# Supplementary material
Source: MDPI journal article supplement (https://www.mdpi.com/2304-6740/11/7/264)

## checkCIF/PLATON report

Structure factors have been supplied for datablock(s) vt-33\_sq

THIS REPORT IS FOR GUIDANCE ONLY. IF USED AS PART OF A REVIEW PROCEDURE FOR PUBLICATION, IT SHOULD NOT REPLACE THE EXPERTISE OF AN EXPERIENCED CRYSTALLOGRAPHIC REFEREE.

No syntax errors found.      CIF dictionary      Interpreting this report

### Datablock: vt-33\_sq

---

|                        |                                 |                                |
|------------------------|---------------------------------|--------------------------------|
| Bond precision:        | C-C = 0.0031 A                  | Wavelength=0.71073             |
| Cell:                  | a=18.3186(3)                    | b=18.3186(3)      c=11.6298(4) |
|                        | alpha=90                        | beta=90      gamma=90          |
| Temperature:           | 290 K                           |                                |
|                        | Calculated                      | Reported                       |
| Volume                 | 3902.63(18)                     | 3902.62(19)                    |
| Space group            | P 42/n                          | P 42/n                         |
| Hall group             | -P 4bc                          | -P 4bc                         |
| Moiety formula         | C15 H12 N4 O4 Zn [+<br>solvent] | ?                              |
| Sum formula            | C15 H12 N4 O4 Zn [+<br>solvent] | C15 H12 N4 O4 Zn               |
| Mr                     | 377.68                          | 377.66                         |
| Dx, g cm <sup>-3</sup> | 1.286                           | 1.286                          |
| Z                      | 8                               | 8                              |
| Mu (mm <sup>-1</sup> ) | 1.281                           | 1.281                          |
| F000                   | 1536.0                          | 1536.0                         |
| F000'                  | 1538.84                         |                                |
| h, k, lmax             | 25, 25, 15                      | 22, 21, 15                     |
| Nref                   | 5261                            | 4505                           |
| Tmin, Tmax             | 0.926, 0.938                    | 0.900, 1.000                   |
| Tmin'                  | 0.880                           |                                |

Correction method= # Reported T Limits: Tmin=0.900 Tmax=1.000

AbsCorr = MULTI-SCAN

Data completeness= 0.856

Theta(max)= 29.164

R(reflections)= 0.0358( 3519)

wR2(reflections)=  
0.0965( 4505)

S = 1.047

Npar= 267

The following ALERTS were generated. Each ALERT has the format

**test-name\_ALERT\_alert-type\_alert-level.**

Click on the hyperlinks for more details of the test.

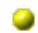

### Alert level C

|                   |                 |                                           |     |       |
|-------------------|-----------------|-------------------------------------------|-----|-------|
| PLAT215_ALERT_3_C | Disordered C101 | has ADP max/min Ratio .....               | 3.8 | Note  |
| PLAT241_ALERT_2_C | High            | 'MainMol' Ueq as Compared to Neighbors of | 02  | Check |
| PLAT242_ALERT_2_C | Low             | 'MainMol' Ueq as Compared to Neighbors of | Zn1 | Check |

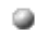

### Alert level G

|                   |                                                  |                |           |
|-------------------|--------------------------------------------------|----------------|-----------|
| PLAT004_ALERT_5_G | Polymeric Structure Found with Maximum Dimension | 2              | Info      |
| PLAT232_ALERT_2_G | Hirshfeld Test Diff (M-X) Zn1 --O1 .             | 13.0           | s.u.      |
| PLAT300_ALERT_4_G | Atom Site Occupancy of N1                        | Constrained at | 0.5 Check |
| PLAT300_ALERT_4_G | Atom Site Occupancy of N101                      | Constrained at | 0.5 Check |
| PLAT300_ALERT_4_G | Atom Site Occupancy of N102                      | Constrained at | 0.5 Check |
| PLAT300_ALERT_4_G | Atom Site Occupancy of N202                      | Constrained at | 0.5 Check |
| PLAT300_ALERT_4_G | Atom Site Occupancy of C101                      | Constrained at | 0.5 Check |
| PLAT300_ALERT_4_G | Atom Site Occupancy of C102                      | Constrained at | 0.5 Check |
| PLAT300_ALERT_4_G | Atom Site Occupancy of C201                      | Constrained at | 0.5 Check |
| PLAT300_ALERT_4_G | Atom Site Occupancy of C202                      | Constrained at | 0.5 Check |
| PLAT300_ALERT_4_G | Atom Site Occupancy of C203                      | Constrained at | 0.5 Check |
| PLAT300_ALERT_4_G | Atom Site Occupancy of C301                      | Constrained at | 0.5 Check |
| PLAT300_ALERT_4_G | Atom Site Occupancy of C401                      | Constrained at | 0.5 Check |
| PLAT300_ALERT_4_G | Atom Site Occupancy of H10A                      | Constrained at | 0.5 Check |
| PLAT300_ALERT_4_G | Atom Site Occupancy of H10B                      | Constrained at | 0.5 Check |
| PLAT300_ALERT_4_G | Atom Site Occupancy of H13A                      | Constrained at | 0.5 Check |
| PLAT300_ALERT_4_G | Atom Site Occupancy of H13B                      | Constrained at | 0.5 Check |
| PLAT300_ALERT_4_G | Atom Site Occupancy of H102                      | Constrained at | 0.5 Check |
| PLAT300_ALERT_4_G | Atom Site Occupancy of H201                      | Constrained at | 0.5 Check |
| PLAT300_ALERT_4_G | Atom Site Occupancy of H202                      | Constrained at | 0.5 Check |
| PLAT300_ALERT_4_G | Atom Site Occupancy of H203                      | Constrained at | 0.5 Check |
| PLAT300_ALERT_4_G | Atom Site Occupancy of H301                      | Constrained at | 0.5 Check |
| PLAT300_ALERT_4_G | Atom Site Occupancy of H401                      | Constrained at | 0.5 Check |
| PLAT301_ALERT_3_G | Main Residue Disorder .....(Resd 1 )             | 23%            | Note      |
| PLAT411_ALERT_2_G | Short Inter H...H Contact H9 ..H203 .            | 2.13           | Ang.      |
|                   | 1/2-y,x,3/2-z =                                  | 8_657          | Check     |
| PLAT605_ALERT_4_G | Largest Solvent Accessible VOID in the Structure | 554            | A**3      |
| PLAT789_ALERT_4_G | Atoms with Negative _atom_site_disorder_group #  | 19             | Check     |
| PLAT822_ALERT_4_G | CIF-embedded .res Contains Negative PART Numbers | 1              | Check     |
| PLAT869_ALERT_4_G | ALERTS Related to the Use of SQUEEZE Suppressed  | !              | Info      |
| PLAT883_ALERT_1_G | No Info/Value for _atom_sites_solution_primary . | Please         | Do !      |
| PLAT899_ALERT_4_G | SHELXL2018 is Deprecated and Succeeded by SHELXL | 2019/3         | Note      |
| PLAT910_ALERT_3_G | Missing # of FCF Reflection(s) Below Theta(Min). | 1              | Note      |
| PLAT912_ALERT_4_G | Missing # of FCF Reflections Above STh/L= 0.600  | 596            | Note      |
| PLAT941_ALERT_3_G | Average HKL Measurement Multiplicity .....       | 2.9            | Low       |
| PLAT950_ALERT_5_G | Calculated (ThMax) and CIF-Reported Hmax Differ  | 3              | Units     |
| PLAT951_ALERT_5_G | Calculated (ThMax) and CIF-Reported Kmax Differ  | 4              | Units     |
| PLAT978_ALERT_2_G | Number C-C Bonds with Positive Residual Density. | 4              | Info      |

---

|    |                      |                                                              |
|----|----------------------|--------------------------------------------------------------|
| 0  | <b>ALERT level A</b> | = Most likely a serious problem - resolve or explain         |
| 0  | <b>ALERT level B</b> | = A potentially serious problem, consider carefully          |
| 3  | <b>ALERT level C</b> | = Check. Ensure it is not caused by an omission or oversight |
| 37 | <b>ALERT level G</b> | = General information/check it is not something unexpected   |
| 1  | ALERT type 1         | CIF construction/syntax error, inconsistent or missing data  |
| 5  | ALERT type 2         | Indicator that the structure model may be wrong or deficient |
| 4  | ALERT type 3         | Indicator that the structure quality may be low              |
| 27 | ALERT type 4         | Improvement, methodology, query or suggestion                |
| 3  | ALERT type 5         | Informative message, check                                   |

---

It is advisable to attempt to resolve as many as possible of the alerts in all categories. Often the minor alerts point to easily fixed oversights, errors and omissions in your CIF or refinement strategy, so attention to these fine details can be worthwhile. In order to resolve some of the more serious problems it may be necessary to carry out additional measurements or structure refinements. However, the purpose of your study may justify the reported deviations and the more serious of these should normally be commented upon in the discussion or experimental section of a paper or in the "special\_details" fields of the CIF. checkCIF was carefully designed to identify outliers and unusual parameters, but every test has its limitations and alerts that are not important in a particular case may appear. Conversely, the absence of alerts does not guarantee there are no aspects of the results needing attention. It is up to the individual to critically assess their own results and, if necessary, seek expert advice.

### **Publication of your CIF in IUCr journals**

A basic structural check has been run on your CIF. These basic checks will be run on all CIFs submitted for publication in IUCr journals (*Acta Crystallographica*, *Journal of Applied Crystallography*, *Journal of Synchrotron Radiation*); however, if you intend to submit to *Acta Crystallographica Section C* or *E* or *IUCrData*, you should make sure that full publication checks are run on the final version of your CIF prior to submission.

### **Publication of your CIF in other journals**

Please refer to the *Notes for Authors* of the relevant journal for any special instructions relating to CIF submission.

---

**PLATON version of 10/05/2023; check.def file version of 10/05/2023**

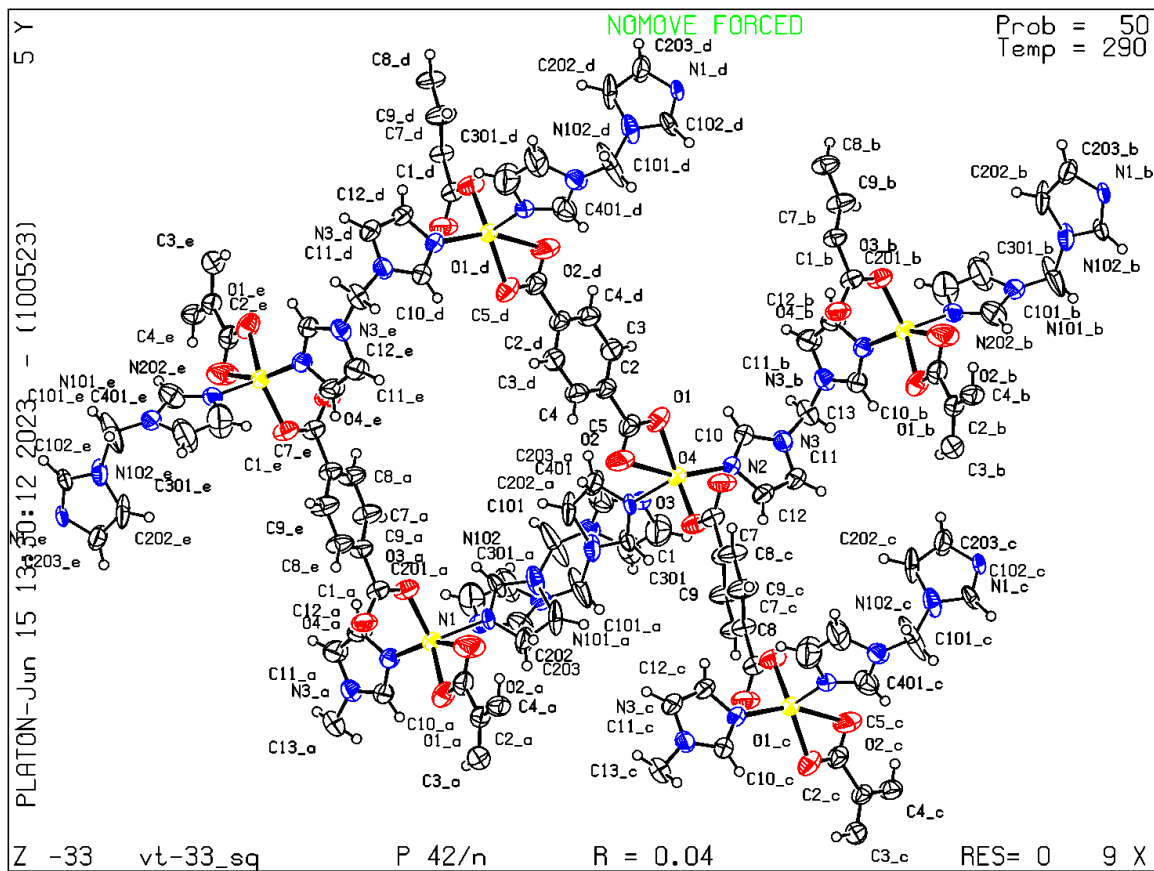

Supplement: s1 [file s1 › CheckCIF_2264504.pdf]
