# Supplementary material
Source: MDPI journal article supplement (https://www.mdpi.com/2304-6740/11/7/264)
Supplement: s1 [file s1]

Archive with 6 entries (6 files):
- Supplementary materials.pdf
- __MACOSX/._Supplementary materials.pdf
- 2264504.cif
- __MACOSX/._2264504.cif
- CheckCIF_2264504.pdf
- __MACOSX/._CheckCIF_2264504.pdf
