# Supplementary material
Source: MDPI journal article supplement (https://www.mdpi.com/2304-6740/11/7/264)
Supplement: s1 [file s1 › 2264504.cif]

 
data_vt-33_sq

_audit_creation_method           SHELXL-2018/3
_shelx_SHELXL_version_number     2018/3
_chemical_name_systematic        ?
_chemical_name_common            ?
_chemical_melting_point          ?
_chemical_formula_moiety         ?
_chemical_formula_sum            'C15 H12 N4 O4 Zn'
_chemical_formula_weight         377.66

loop_
_atom_type_symbol
_atom_type_description
_atom_type_scat_dispersion_real
_atom_type_scat_dispersion_imag
_atom_type_scat_source
C C 0.0033 0.0016 'International Tables Vol C Tables 4.2.6.8 and 6.1.1.4'
H H 0.0000 0.0000 'International Tables Vol C Tables 4.2.6.8 and 6.1.1.4'
N N 0.0061 0.0033 'International Tables Vol C Tables 4.2.6.8 and 6.1.1.4'
O O 0.0106 0.0060 'International Tables Vol C Tables 4.2.6.8 and 6.1.1.4'
Zn Zn 0.2839 1.4301 'International Tables Vol C Tables 4.2.6.8 and 6.1.1.4'

_space_group_crystal_system      tetragonal
_space_group_IT_number           86
_space_group_name_H-M_alt        'P 42/n'
_space_group_name_Hall           '-P 4bc'

_shelx_space_group_comment       
;
The symmetry employed for this shelxl refinement is uniquely defined
by the following loop, which should always be used as a source of
symmetry information in preference to the above space-group names.
They are only intended as comments.
;

loop_
_space_group_symop_operation_xyz
'x, y, z'
'-x+1/2, -y+1/2, z'
'-y, x+1/2, z+1/2'
'y+1/2, -x, z+1/2'
'-x, -y, -z'
'x-1/2, y-1/2, -z'
'y, -x-1/2, -z-1/2'
'-y-1/2, x, -z-1/2'

_cell_length_a                   18.3186(3)
_cell_length_b                   18.3186(3)
_cell_length_c                   11.6298(4)
_cell_angle_alpha                90
_cell_angle_beta                 90
_cell_angle_gamma                90
_cell_volume                     3902.62(19)
_cell_formula_units_Z            8
_cell_measurement_temperature    290(2)
_cell_measurement_reflns_used    5131
_cell_measurement_theta_min      2.3620
_cell_measurement_theta_max      28.6940

_exptl_crystal_description       block
_exptl_crystal_colour            colourless
_exptl_crystal_density_meas      ?
_exptl_crystal_density_method    ?
_exptl_crystal_density_diffrn    1.286
_exptl_crystal_F_000             1536
_exptl_transmission_factor_min   ?
_exptl_transmission_factor_max   ?
_exptl_crystal_size_max          0.100
_exptl_crystal_size_mid          0.050
_exptl_crystal_size_min          0.050
_exptl_absorpt_coefficient_mu    1.281
_shelx_estimated_absorpt_T_min   ?
_shelx_estimated_absorpt_T_max   ?
_exptl_absorpt_correction_type   multi-scan
_exptl_absorpt_correction_T_min  0.89976
_exptl_absorpt_correction_T_max  1.00000
_exptl_absorpt_process_details   
;
CrysAlisPro 1.171.41.123a (Rigaku Oxford Diffraction, 2022)
Empirical absorption correction using spherical harmonics,
implemented in SCALE3 ABSPACK scaling algorithm.
;
_exptl_absorpt_special_details   ?
_diffrn_ambient_temperature      290(2)
_diffrn_radiation_wavelength     0.71073
_diffrn_radiation_type           MoK\a
_diffrn_source                   'sealed X-ray tube'
_diffrn_measurement_device_type  'New Xcalibur, AtlasS2'
_diffrn_measurement_method       '\w scans'
_diffrn_detector_area_resol_mean 10.6
_diffrn_reflns_number            13026
_diffrn_reflns_av_unetI/netI     0.0239
_diffrn_reflns_av_R_equivalents  0.0211
_diffrn_reflns_limit_h_min       -18
_diffrn_reflns_limit_h_max       22
_diffrn_reflns_limit_k_min       -18
_diffrn_reflns_limit_k_max       21
_diffrn_reflns_limit_l_min       -15
_diffrn_reflns_limit_l_max       13
_diffrn_reflns_theta_min         2.074
_diffrn_reflns_theta_max         29.164
_diffrn_reflns_theta_full        25.242
_diffrn_measured_fraction_theta_max 0.856
_diffrn_measured_fraction_theta_full 1.000
_diffrn_reflns_Laue_measured_fraction_max 0.856
_diffrn_reflns_Laue_measured_fraction_full 1.000
_diffrn_reflns_point_group_measured_fraction_max 0.856
_diffrn_reflns_point_group_measured_fraction_full 1.000
_reflns_number_total             4505
_reflns_number_gt                3519
_reflns_threshold_expression     'I > 2\s(I)'
_reflns_Friedel_coverage         0.000
_reflns_Friedel_fraction_max     .
_reflns_Friedel_fraction_full    .

_reflns_special_details          
;
 Reflections were merged by SHELXL according to the crystal
 class for the calculation of statistics and refinement.
 
 Structure factors included contributions from the .fab file.
 
 _reflns_Friedel_fraction is defined as the number of unique
 Friedel pairs measured divided by the number that would be
 possible theoretically, ignoring centric projections and
 systematic absences.
;
_computing_data_collection       'CrysAlisPro 1.171.39.46 (Rigaku OD, 2018)'
_computing_cell_refinement       'CrysAlisPro 1.171.39.46 (Rigaku OD, 2018)'
_computing_data_reduction        'CrysAlisPro 1.171.39.46 (Rigaku OD, 2018)'
_computing_structure_solution    'SHELXT 2014/5 (Sheldrick, 2014)'
_computing_structure_refinement  'SHELXL-2018/3 (Sheldrick, 2018)'
_computing_molecular_graphics    ?
_computing_publication_material  ?
_refine_special_details          ?
_refine_ls_structure_factor_coef Fsqd
_refine_ls_matrix_type           full
_refine_ls_weighting_scheme      calc
_refine_ls_weighting_details     
'w=1/[\s^2^(Fo^2^)+(0.0391P)^2^+1.9681P] where P=(Fo^2^+2Fc^2^)/3'
_atom_sites_solution_primary     ?
_atom_sites_solution_secondary   ?
_atom_sites_solution_hydrogens   geom
_refine_ls_hydrogen_treatment    constr
_refine_ls_extinction_method     none
_refine_ls_extinction_coef       .
_refine_ls_number_reflns         4505
_refine_ls_number_parameters     267
_refine_ls_number_restraints     0
_refine_ls_R_factor_all          0.0487
_refine_ls_R_factor_gt           0.0358
_refine_ls_wR_factor_ref         0.0965
_refine_ls_wR_factor_gt          0.0898
_refine_ls_goodness_of_fit_ref   1.047
_refine_ls_restrained_S_all      1.047
_refine_ls_shift/su_max          0.001
_refine_ls_shift/su_mean         0.000

loop_
_atom_site_label
_atom_site_type_symbol
_atom_site_fract_x
_atom_site_fract_y
_atom_site_fract_z
_atom_site_U_iso_or_equiv
_atom_site_adp_type
_atom_site_occupancy
_atom_site_site_symmetry_order
_atom_site_calc_flag
_atom_site_refinement_flags_posn
_atom_site_refinement_flags_adp
_atom_site_refinement_flags_occupancy
_atom_site_disorder_assembly
_atom_site_disorder_group
Zn1 Zn 0.51081(2) 0.25269(2) 0.74162(2) 0.03820(10) Uani 1 1 d . . . . .
O1 O 0.53986(10) 0.34983(9) 0.80232(16) 0.0593(5) Uani 1 1 d . . . . .
O2 O 0.45049(12) 0.31470(11) 0.9131(2) 0.0913(7) Uani 1 1 d . . . . .
O3 O 0.49587(9) 0.15780(8) 0.81255(14) 0.0533(4) Uani 1 1 d . . . . .
O4 O 0.58247(10) 0.17918(9) 0.94057(17) 0.0657(5) Uani 1 1 d . . . . .
N2 N 0.59503(10) 0.22604(9) 0.63460(17) 0.0454(4) Uani 1 1 d . . . . .
N3 N 0.68946(9) 0.22466(10) 0.52010(17) 0.0471(5) Uani 1 1 d . . . . .
C1 C 0.53384(13) 0.14094(12) 0.9000(2) 0.0470(5) Uani 1 1 d . . . . .
C2 C 0.49904(12) 0.43307(12) 0.9442(2) 0.0450(5) Uani 1 1 d . . . . .
C3 C 0.54247(13) 0.48878(13) 0.9046(2) 0.0515(6) Uani 1 1 d . . . . .
H3 H 0.571585 0.481572 0.840095 0.062 Uiso 1 1 calc R U . . .
C4 C 0.45679(14) 0.44449(13) 1.0399(2) 0.0533(6) Uani 1 1 d . . . . .
H4 H 0.427422 0.407024 1.067685 0.064 Uiso 1 1 calc R U . . .
C5 C 0.49602(14) 0.36028(13) 0.8831(2) 0.0531(6) Uani 1 1 d . . . . .
C7 C 0.51643(13) 0.06787(11) 0.95277(19) 0.0457(5) Uani 1 1 d . . . . .
C8 C 0.46212(15) -0.05133(13) 0.9370(2) 0.0567(7) Uani 1 1 d . . . . .
H8 H 0.436754 -0.085614 0.893605 0.068 Uiso 1 1 calc R U . . .
C9 C 0.47818(16) 0.01602(13) 0.8908(2) 0.0595(7) Uani 1 1 d . . . . .
H9 H 0.462998 0.026851 0.816447 0.071 Uiso 1 1 calc R U . . .
C10 C 0.64081(12) 0.26607(13) 0.5755(2) 0.0497(6) Uani 1 1 d . . . . .
H10 H 0.639613 0.316788 0.572449 0.060 Uiso 1 1 calc R U . . .
C11 C 0.67407(14) 0.15371(14) 0.5454(3) 0.0682(8) Uani 1 1 d . . . . .
H11 H 0.698921 0.112593 0.519541 0.082 Uiso 1 1 calc R U . . .
C12 C 0.61557(14) 0.15522(13) 0.6153(3) 0.0658(8) Uani 1 1 d . . . . .
H12 H 0.592574 0.114346 0.645962 0.079 Uiso 1 1 calc R U . . .
C13 C 0.750000 0.250000 0.4488(3) 0.0554(9) Uani 1 2 d S T P . .
H13A H 0.733457 0.289532 0.399828 0.067 Uiso 0.5 1 calc R U P . .
H13B H 0.766543 0.210467 0.399830 0.067 Uiso 0.5 1 calc R U P . .
C101 C 0.2515(3) 0.2945(5) 0.5128(7) 0.128(4) Uani 0.5 1 d . . P A -1
H10A H 0.248971 0.283146 0.431490 0.153 Uiso 0.5 1 calc R U P A -1
H10B H 0.242943 0.346495 0.521442 0.153 Uiso 0.5 1 calc R U P A -1
N101 N 0.3199(4) 0.2788(3) 0.5518(6) 0.0486(15) Uani 0.5 1 d . . P A -1
C201 C 0.4218(4) 0.2103(4) 0.5505(7) 0.101(2) Uani 0.5 1 d . . P A -1
H201 H 0.456726 0.175389 0.532041 0.121 Uiso 0.5 1 calc R U P A -1
C301 C 0.3583(4) 0.2177(5) 0.4992(10) 0.115(3) Uani 0.5 1 d . . P A -1
H301 H 0.340900 0.188890 0.439414 0.138 Uiso 0.5 1 calc R U P A -1
N102 N 0.1923(3) 0.2538(4) 0.5741(6) 0.0610(17) Uani 0.5 1 d . . P A -1
C102 C 0.1318(2) 0.2804(3) 0.6078(4) 0.0447(11) Uani 0.5 1 d . . P A -1
H102 H 0.118874 0.329089 0.597489 0.054 Uiso 0.5 1 calc R U P A -1
C202 C 0.1884(3) 0.1756(4) 0.6012(5) 0.0745(19) Uani 0.5 1 d . . P A -1
H202 H 0.222983 0.139919 0.584686 0.089 Uiso 0.5 1 calc R U P A -1
C203 C 0.1233(5) 0.1668(4) 0.6558(9) 0.065(2) Uani 0.5 1 d . . P A -1
H203 H 0.104786 0.123558 0.686023 0.078 Uiso 0.5 1 calc R U P A -1
C401 C 0.3693(5) 0.3028(5) 0.6328(7) 0.064(2) Uani 0.5 1 d . . P A -1
H401 H 0.361446 0.343234 0.679621 0.076 Uiso 0.5 1 calc R U P A -1
N1 N 0.0903(5) 0.2337(7) 0.6574(12) 0.0369(17) Uani 0.5 1 d . . P A -1
N202 N 0.4288(6) 0.2626(7) 0.6370(12) 0.042(2) Uani 0.5 1 d . . P A -1

loop_
_atom_site_aniso_label
_atom_site_aniso_U_11
_atom_site_aniso_U_22
_atom_site_aniso_U_33
_atom_site_aniso_U_23
_atom_site_aniso_U_13
_atom_site_aniso_U_12
Zn1 0.03915(15) 0.02986(14) 0.04560(17) -0.00185(10) 0.00156(10) 0.00185(9)
O1 0.0778(12) 0.0447(9) 0.0553(10) -0.0127(8) -0.0047(10) 0.0126(8)
O2 0.0900(15) 0.0561(12) 0.128(2) -0.0405(13) 0.0148(14) -0.0203(11)
O3 0.0729(11) 0.0380(8) 0.0492(10) 0.0071(7) -0.0098(8) -0.0095(7)
O4 0.0684(11) 0.0444(9) 0.0843(13) 0.0111(9) -0.0206(10) -0.0193(8)
N2 0.0426(10) 0.0351(9) 0.0586(12) -0.0086(9) 0.0066(9) 0.0030(7)
N3 0.0368(9) 0.0536(11) 0.0510(11) -0.0095(9) 0.0021(8) 0.0003(8)
C1 0.0574(14) 0.0348(11) 0.0489(13) 0.0002(10) -0.0013(11) -0.0040(10)
C2 0.0494(13) 0.0380(11) 0.0478(13) -0.0107(10) -0.0130(10) 0.0035(9)
C3 0.0527(14) 0.0550(14) 0.0469(13) -0.0135(11) -0.0001(11) 0.0004(11)
C4 0.0586(15) 0.0440(13) 0.0573(15) -0.0081(11) -0.0016(12) -0.0076(10)
C5 0.0573(15) 0.0449(13) 0.0572(15) -0.0122(11) -0.0170(12) 0.0089(11)
C7 0.0577(14) 0.0356(11) 0.0437(12) -0.0005(9) -0.0054(10) -0.0089(9)
C8 0.0816(18) 0.0411(13) 0.0472(14) -0.0004(10) -0.0175(13) -0.0189(12)
C9 0.093(2) 0.0443(13) 0.0413(13) 0.0050(10) -0.0190(13) -0.0198(12)
C10 0.0445(13) 0.0409(12) 0.0637(15) -0.0024(11) 0.0071(11) 0.0024(9)
C11 0.0593(16) 0.0442(14) 0.101(2) -0.0257(14) 0.0222(15) -0.0002(11)
C12 0.0618(16) 0.0360(13) 0.100(2) -0.0167(13) 0.0263(15) -0.0033(10)
C13 0.0380(17) 0.080(3) 0.0484(19) 0.000 0.000 0.0000(16)
C101 0.025(3) 0.238(10) 0.119(5) 0.118(6) 0.017(3) 0.020(5)
N101 0.044(3) 0.045(3) 0.057(3) 0.012(3) -0.005(2) -0.003(2)
C201 0.085(5) 0.103(5) 0.114(6) -0.041(5) -0.027(5) 0.022(4)
C301 0.051(4) 0.122(6) 0.173(9) -0.045(6) -0.018(5) 0.012(4)
N102 0.036(3) 0.078(5) 0.069(4) 0.038(4) 0.010(3) 0.021(3)
C102 0.020(2) 0.062(3) 0.053(3) 0.034(2) 0.0014(19) 0.0041(18)
C202 0.052(3) 0.095(5) 0.077(4) 0.023(4) 0.013(3) 0.052(3)
C203 0.056(4) 0.049(4) 0.090(6) 0.018(4) 0.018(4) 0.022(3)
C401 0.053(4) 0.080(7) 0.058(4) -0.007(4) 0.014(3) -0.008(5)
N1 0.019(4) 0.041(3) 0.050(5) -0.001(3) -0.003(3) 0.010(3)
N202 0.037(6) 0.036(3) 0.053(5) -0.007(3) 0.002(4) -0.003(4)

_geom_special_details            
;
 All esds (except the esd in the dihedral angle between two l.s. planes)
 are estimated using the full covariance matrix.  The cell esds are taken
 into account individually in the estimation of esds in distances, angles
 and torsion angles; correlations between esds in cell parameters are only
 used when they are defined by crystal symmetry.  An approximate (isotropic)
 treatment of cell esds is used for estimating esds involving l.s. planes.
;

loop_
_geom_bond_atom_site_label_1
_geom_bond_atom_site_label_2
_geom_bond_distance
_geom_bond_site_symmetry_2
_geom_bond_publ_flag
Zn1 N202 1.941(15) . ?
Zn1 O3 1.9435(15) . ?
Zn1 O1 1.9870(16) . ?
Zn1 N2 2.0414(18) . ?
Zn1 C5 2.581(2) . ?
O1 C5 1.250(3) . ?
O2 C5 1.231(3) . ?
O3 C1 1.270(3) . ?
O4 C1 1.227(3) . ?
N2 C10 1.309(3) . ?
N2 C12 1.369(3) . ?
N3 C10 1.336(3) . ?
N3 C11 1.362(3) . ?
N3 C13 1.460(3) . ?
C1 C7 1.507(3) . ?
C2 C4 1.372(3) . ?
C2 C3 1.373(3) . ?
C2 C5 1.512(3) . ?
C3 C4 1.382(3) 5_667 ?
C3 H3 0.9300 . ?
C4 H4 0.9300 . ?
C7 C8 1.375(3) 5_657 ?
C7 C9 1.383(3) . ?
C8 C9 1.377(3) . ?
C8 H8 0.9300 . ?
C9 H9 0.9300 . ?
C10 H10 0.9300 . ?
C11 C12 1.346(4) . ?
C11 H11 0.9300 . ?
C12 H12 0.9300 . ?
C13 H13A 0.9700 . ?
C13 H13B 0.9700 . ?
C101 N101 1.363(9) . ?
C101 N102 1.497(8) . ?
C101 H10A 0.9700 . ?
C101 H10B 0.9700 . ?
N101 C401 1.379(11) . ?
N101 C301 1.456(11) . ?
C201 C301 1.314(9) . ?
C201 N202 1.396(15) . ?
C201 H201 0.9300 . ?
C301 H301 0.9300 . ?
N102 C102 1.272(7) . ?
N102 C202 1.469(9) . ?
C102 N1 1.282(15) . ?
C102 H102 0.9300 . ?
C202 C203 1.361(11) . ?
C202 H202 0.9300 . ?
C203 N1 1.367(13) . ?
C203 H203 0.9300 . ?
C401 N202 1.316(13) . ?
C401 H401 0.9300 . ?

loop_
_geom_angle_atom_site_label_1
_geom_angle_atom_site_label_2
_geom_angle_atom_site_label_3
_geom_angle
_geom_angle_site_symmetry_1
_geom_angle_site_symmetry_3
_geom_angle_publ_flag
N202 Zn1 O3 103.9(4) . . ?
N202 Zn1 O1 110.2(4) . . ?
O3 Zn1 O1 133.47(7) . . ?
N202 Zn1 N2 103.0(3) . . ?
O3 Zn1 N2 98.70(7) . . ?
O1 Zn1 N2 103.20(7) . . ?
N202 Zn1 C5 104.3(3) . . ?
O3 Zn1 C5 113.43(8) . . ?
O1 Zn1 C5 28.11(8) . . ?
N2 Zn1 C5 130.57(8) . . ?
C5 O1 Zn1 103.41(16) . . ?
C1 O3 Zn1 118.69(14) . . ?
C10 N2 C12 105.59(19) . . ?
C10 N2 Zn1 132.10(15) . . ?
C12 N2 Zn1 122.28(16) . . ?
C10 N3 C11 107.4(2) . . ?
C10 N3 C13 126.87(18) . . ?
C11 N3 C13 125.66(17) . . ?
O4 C1 O3 124.5(2) . . ?
O4 C1 C7 120.3(2) . . ?
O3 C1 C7 115.21(19) . . ?
C4 C2 C3 119.0(2) . . ?
C4 C2 C5 119.7(2) . . ?
C3 C2 C5 121.3(2) . . ?
C2 C3 C4 120.4(2) . 5_667 ?
C2 C3 H3 119.8 . . ?
C4 C3 H3 119.8 5_667 . ?
C2 C4 C3 120.5(2) . 5_667 ?
C2 C4 H4 119.7 . . ?
C3 C4 H4 119.7 5_667 . ?
O2 C5 O1 123.0(2) . . ?
O2 C5 C2 119.3(2) . . ?
O1 C5 C2 117.7(2) . . ?
O2 C5 Zn1 74.56(15) . . ?
O1 C5 Zn1 48.48(12) . . ?
C2 C5 Zn1 165.7(2) . . ?
C8 C7 C9 118.6(2) 5_657 . ?
C8 C7 C1 121.0(2) 5_657 . ?
C9 C7 C1 120.4(2) . . ?
C7 C8 C9 120.0(2) 5_657 . ?
C7 C8 H8 120.0 5_657 . ?
C9 C8 H8 120.0 . . ?
C8 C9 C7 121.4(2) . . ?
C8 C9 H9 119.3 . . ?
C7 C9 H9 119.3 . . ?
N2 C10 N3 111.3(2) . . ?
N2 C10 H10 124.4 . . ?
N3 C10 H10 124.4 . . ?
C12 C11 N3 106.0(2) . . ?
C12 C11 H11 127.0 . . ?
N3 C11 H11 127.0 . . ?
C11 C12 N2 109.7(2) . . ?
C11 C12 H12 125.1 . . ?
N2 C12 H12 125.1 . . ?
N3 C13 N3 110.8(3) . 2_655 ?
N3 C13 H13A 109.5 . . ?
N3 C13 H13A 109.5 2_655 . ?
N3 C13 H13B 109.5 . . ?
N3 C13 H13B 109.5 2_655 . ?
H13A C13 H13B 108.1 . . ?
N101 C101 N102 113.8(5) . . ?
N101 C101 H10A 108.8 . . ?
N102 C101 H10A 108.8 . . ?
N101 C101 H10B 108.8 . . ?
N102 C101 H10B 108.8 . . ?
H10A C101 H10B 107.7 . . ?
C101 N101 C401 139.7(9) . . ?
C101 N101 C301 117.9(7) . . ?
C401 N101 C301 102.4(7) . . ?
C301 C201 N202 109.7(8) . . ?
C301 C201 H201 125.1 . . ?
N202 C201 H201 125.1 . . ?
C201 C301 N101 108.5(8) . . ?
C201 C301 H301 125.8 . . ?
N101 C301 H301 125.8 . . ?
C102 N102 C202 105.4(5) . . ?
C102 N102 C101 126.0(6) . . ?
C202 N102 C101 128.5(6) . . ?
N102 C102 N1 113.5(7) . . ?
N102 C102 H102 123.2 . . ?
N1 C102 H102 123.2 . . ?
C203 C202 N102 105.0(5) . . ?
C203 C202 H202 127.5 . . ?
N102 C202 H202 127.5 . . ?
C202 C203 N1 106.7(8) . . ?
C202 C203 H203 126.7 . . ?
N1 C203 H203 126.7 . . ?
N202 C401 N101 112.9(10) . . ?
N202 C401 H401 123.5 . . ?
N101 C401 H401 123.5 . . ?
C102 N1 C203 109.3(9) . . ?
C401 N202 C201 106.3(11) . . ?
C401 N202 Zn1 135.8(10) . . ?
C201 N202 Zn1 117.3(7) . . ?

_refine_diff_density_max         0.375
_refine_diff_density_min         -0.320
_refine_diff_density_rms         0.045

_shelx_res_file                  
;
TITL VT-33_auto_a.res in P4(2)/n
    vt-33_sq.res
    created by SHELXL-2018/3 at 19:22:46 on 15-Jun-2023
REM Old TITL VT-33_auto in P4(2)/n
REM SHELXT solution in P4(2)/n
REM R1 0.161,  Rweak 0.003,  Alpha 0.050,  Orientation as input
REM Formula found by SHELXT:  C29 N6 O8 Zn2
CELL  0.71073  18.3186  18.3186  11.6298   90.000   90.000   90.000
ZERR   8   0.0003   0.0003   0.0004    0.000    0.000    0.000
LATT  1
SYMM 1/2-X, 1/2-Y, Z
SYMM -Y, 1/2+X, 1/2+Z
SYMM 1/2+Y, -X, 1/2+Z
SFAC C H N O ZN
UNIT 120 96 32 32 8
LIST 4 ! automatically inserted. Change 6 to 4 for CHECKCIF!!
ACTA
TEMP 17
L.S. 5 0   41
BOND $H
FMAP 2
PLAN 20
ABIN
WGHT    0.039100    1.968100
FVAR       0.21601
ZN1   5    0.510810    0.252687    0.741620    11.00000    0.03915    0.02986 =
         0.04560   -0.00185    0.00156    0.00185
O1    4    0.539859    0.349831    0.802320    11.00000    0.07778    0.04473 =
         0.05527   -0.01273   -0.00468    0.01259
O2    4    0.450487    0.314701    0.913067    11.00000    0.09004    0.05614 =
         0.12772   -0.04047    0.01482   -0.02035
O3    4    0.495870    0.157795    0.812552    11.00000    0.07285    0.03797 =
         0.04920    0.00709   -0.00984   -0.00946
O4    4    0.582475    0.179180    0.940569    11.00000    0.06840    0.04442 =
         0.08435    0.01108   -0.02063   -0.01930

N2    3    0.595025    0.226042    0.634603    11.00000    0.04256    0.03509 =
         0.05857   -0.00859    0.00660    0.00295
N3    3    0.689456    0.224665    0.520102    11.00000    0.03681    0.05359 =
         0.05102   -0.00955    0.00205    0.00034
C1    1    0.533843    0.140945    0.900021    11.00000    0.05742    0.03476 =
         0.04889    0.00022   -0.00129   -0.00404
C2    1    0.499039    0.433069    0.944159    11.00000    0.04941    0.03796 =
         0.04775   -0.01068   -0.01302    0.00347
C3    1    0.542475    0.488785    0.904619    11.00000    0.05271    0.05496 =
         0.04692   -0.01345   -0.00007    0.00036
AFIX  43
H3    2    0.571585    0.481572    0.840095    11.00000   -1.20000
AFIX   0
C4    1    0.456793    0.444486    1.039894    11.00000    0.05859    0.04398 =
         0.05725   -0.00808   -0.00158   -0.00758
AFIX  43
H4    2    0.427422    0.407024    1.067685    11.00000   -1.20000
AFIX   0
C5    1    0.496024    0.360281    0.883064    11.00000    0.05735    0.04488 =
         0.05720   -0.01217   -0.01696    0.00886
C7    1    0.516429    0.067869    0.952774    11.00000    0.05775    0.03563 =
         0.04367   -0.00051   -0.00538   -0.00887
C8    1    0.462116   -0.051332    0.936998    11.00000    0.08164    0.04114 =
         0.04717   -0.00043   -0.01755   -0.01887
AFIX  43
H8    2    0.436754   -0.085614    0.893605    11.00000   -1.20000
AFIX   0
C9    1    0.478185    0.016023    0.890822    11.00000    0.09289    0.04435 =
         0.04135    0.00500   -0.01903   -0.01976
AFIX  43
H9    2    0.462998    0.026851    0.816447    11.00000   -1.20000
AFIX   0
C10   1    0.640805    0.266070    0.575491    11.00000    0.04448    0.04089 =
         0.06369   -0.00237    0.00715    0.00236
AFIX  43
H10   2    0.639613    0.316788    0.572449    11.00000   -1.20000
AFIX   0
C11   1    0.674065    0.153710    0.545374    11.00000    0.05934    0.04417 =
         0.10117   -0.02572    0.02223   -0.00023
AFIX  43
H11   2    0.698921    0.112593    0.519541    11.00000   -1.20000
AFIX   0
C12   1    0.615568    0.155219    0.615335    11.00000    0.06183    0.03599 =
         0.09951   -0.01670    0.02634   -0.00327
AFIX  43
H12   2    0.592574    0.114346    0.645962    11.00000   -1.20000
AFIX   0
C13   1    0.750000    0.250000    0.448820    10.50000    0.03804    0.07984 =
         0.04842    0.00000    0.00000    0.00005
AFIX  23
H13A  2    0.733457    0.289532    0.399828    10.50000   -1.20000
H13B  2    0.766543    0.210467    0.399830    10.50000   -1.20000
AFIX   0
PART -1 10.5
C101  1    0.251507    0.294526    0.512849    10.50000    0.02537    0.23839 =
         0.11898    0.11835    0.01669    0.01994
AFIX  23
H10A  2    0.248971    0.283146    0.431490    10.50000   -1.20000
H10B  2    0.242943    0.346495    0.521442    10.50000   -1.20000
AFIX   0
N101  3    0.319905    0.278762    0.551767    10.50000    0.04362    0.04523 =
         0.05699    0.01227   -0.00499   -0.00269
C201  1    0.421770    0.210281    0.550549    10.50000    0.08528    0.10311 =
         0.11420   -0.04131   -0.02667    0.02209
AFIX  43
H201  2    0.456726    0.175389    0.532041    10.50000   -1.20000
AFIX   0
C301  1    0.358325    0.217735    0.499223    10.50000    0.05078    0.12183 =
         0.17275   -0.04495   -0.01755    0.01248
AFIX  43
H301  2    0.340900    0.188890    0.439414    10.50000   -1.20000
AFIX   0
N102  3    0.192255    0.253836    0.574096    10.50000    0.03564    0.07839 =
         0.06886    0.03781    0.01034    0.02148
C102  1    0.131763    0.280425    0.607821    10.50000    0.01961    0.06164 =
         0.05287    0.03426    0.00136    0.00405
AFIX  43
H102  2    0.118874    0.329089    0.597489    10.50000   -1.20000
AFIX   0
C202  1    0.188433    0.175611    0.601194    10.50000    0.05184    0.09504 =
         0.07663    0.02295    0.01312    0.05239
AFIX  43
H202  2    0.222983    0.139919    0.584686    10.50000   -1.20000
AFIX   0
C203  1    0.123274    0.166758    0.655752    10.50000    0.05606    0.04942 =
         0.09046    0.01818    0.01778    0.02227
AFIX  43
H203  2    0.104786    0.123558    0.686023    10.50000   -1.20000
AFIX   0
C401  1    0.369329    0.302824    0.632832    10.50000    0.05308    0.08003 =
         0.05791   -0.00749    0.01355   -0.00824
AFIX  43
H401  2    0.361446    0.343234    0.679621    10.50000   -1.20000
AFIX   0
N1    3    0.090310    0.233679    0.657399    10.50000    0.01924    0.04137 =
         0.05004   -0.00147   -0.00335    0.00966
N202  3    0.428802    0.262617    0.637036    10.50000    0.03678    0.03552 =
         0.05305   -0.00691    0.00245   -0.00318
PART 0
HKLF 4


REM  VT-33_auto_a.res in P4(2)/n
REM wR2 = 0.0965, GooF = S = 1.047, Restrained GooF = 1.047 for all data
REM R1 = 0.0358 for 3519 Fo > 4sig(Fo) and 0.0487 for all 4505 data
REM 267 parameters refined using 0 restraints

END

WGHT      0.0391      1.9683

REM Highest difference peak  0.375,  deepest hole -0.320,  1-sigma level  0.045
Q1    1   0.5829  0.3766  0.7788  11.00000  0.05    0.37
Q2    1   0.1591  0.1635  0.5621  11.00000  0.05    0.25
Q3    1   0.2500  0.2500  0.4797  10.50000  0.05    0.23
Q4    1   0.5390  0.3811  0.8592  11.00000  0.05    0.23
Q5    1   0.5027  0.3090  0.8765  11.00000  0.05    0.22
Q6    1   0.2151  0.1796  0.5989  11.00000  0.05    0.20
Q7    1   0.2417  0.2997  0.4273  11.00000  0.05    0.20
Q8    1   0.3363  0.1549  0.3604  11.00000  0.05    0.20
Q9    1   0.2522  0.3176  0.4927  11.00000  0.05    0.20
Q10   1   0.5150  0.4565  0.9318  11.00000  0.05    0.20
Q11   1   0.4794  0.0534  0.9349  11.00000  0.05    0.19
Q12   1   0.1310  0.2686  0.5750  11.00000  0.05    0.19
Q13   1   0.4000  0.2274  0.3827  11.00000  0.05    0.19
Q14   1   0.1926  0.2098  0.6159  11.00000  0.05    0.18
Q15   1   0.5707  0.2378  0.6853  11.00000  0.05    0.18
Q16   1   0.4989  0.4095  0.9197  11.00000  0.05    0.18
Q17   1   0.1713  0.1607  0.6448  11.00000  0.05    0.17
Q18   1   0.3687  0.1964  0.3515  11.00000  0.05    0.17
Q19   1   0.1955  0.1348  0.5985  11.00000  0.05    0.17
Q20   1   0.4951  0.4314  1.0047  11.00000  0.05    0.17
;
_shelx_res_checksum              63819

_shelx_hkl_file                  
;
   0   0  -2   65.70    1.49
   0   0  -2   68.03    1.52
   0   0  -3    0.32    0.25
   0   0  -3    0.75    0.28
   0   0  -4  130.45    3.00
   0   0  -4  135.19    2.96
   0   0  -5    0.38    0.35
   0   0  -5   -0.14    0.25
   0   0  -6 2018.22   25.60
   0   0  -6 2013.90   25.46
   0   0  -7    0.20    0.38
   0   0  -7    2.60    0.55
   0   0  -8   89.94    3.26
   0   0  -8   84.58    3.10
   0   0  -9   -0.17    0.49
   0   0  -9   -0.74    0.57
   0   0 -10  169.56    5.19
   0   0 -11   -0.45    0.62
   0   0 -12   12.04    1.55
   0   0 -13    0.59    0.80
   0   0 -14   37.73    2.90
   0  -1  -1 1088.00   11.50
   1   0   1 1384.36   11.37
   0  -1  -2    7.86    0.53
   0   1  -2    6.64    0.41
   0   1   2    6.93    0.44
   0   1   2    7.48    0.50
   1   0  -2    7.06    0.47
   0  -1  -2    7.23    0.45
  -1   0  -2    6.73    0.42
   1   0   2    6.66    0.44
   0  -1  -3  614.54    8.53
   1   0  -3  623.40    8.71
   0   1   3  628.28    8.57
  -1   0  -3  631.92    8.48
   0  -1  -3  619.89    8.67
   1   0   3  647.61    8.56
  -1   0  -3  619.51    8.48
   1   0  -4   16.65    0.98
   0  -1  -4   16.12    0.94
   1   0   4   16.97    0.99
  -1   0  -4   17.10    0.97
   1   0  -4   18.60    1.06
   0   1  -4   17.25    0.92
  -1   0  -4   16.63    0.92
   0  -1  -4   16.96    1.00
  -1   0  -5  132.84    3.24
   0  -1  -5  129.39    3.20
   1   0   5  135.50    3.24
   1   0  -5  133.97    3.36
   1   0  -5  134.60    3.28
   0  -1  -5  132.45    3.32
  -1   0  -5  131.45    3.18
   0   1  -5  128.72    3.13
  -1   0  -6   10.78    0.97
   0   1  -6    7.30    0.82
   0  -1  -6    9.25    0.92
   1   0  -6    8.65    0.91
  -1   0  -6    8.49    0.86
   0  -1  -6    9.63    0.92
   0   1  -6   10.09    0.90
   1   0  -6    9.49    0.92
  -1   0  -7  136.02    3.80
   0   1  -7  139.03    3.96
   1   0  -7  135.97    3.91
   0  -1  -7  135.26    3.83
   1   0  -7  141.03    3.88
   0   1  -7  139.63    3.75
  -1   0  -7  137.77    3.80
   0  -1  -7  138.99    3.90
   0   1  -8    2.24    0.73
  -1   0  -8    2.34    0.62
   0  -1  -8    3.36    0.72
   1   0  -8    2.00    0.59
   0  -1  -8    1.64    0.49
   1   0  -8    3.31    0.63
  -1   0  -8    1.62    0.52
   0   1  -8    2.52    0.59
  -1   0  -9   40.95    2.27
   1   0  -9   44.06    2.42
   0  -1  -9   38.74    2.23
   0   1  -9   41.26    2.32
   0   1  -9   43.21    2.26
   0  -1  -9   42.24    2.32
  -1   0  -9   41.25    2.26
   1   0  -9   40.60    2.25
  -1   0 -10   45.34    2.56
   1   0 -10   51.43    2.76
   0  -1 -10   45.94    2.59
   0   1 -10   44.32    2.56
   0   1 -11   20.94    1.88
  -1   0 -11   20.18    1.84
   0  -1 -11   21.60    1.89
   1   0 -11   19.75    1.83
  -1   0 -12   12.79    1.52
   0  -1 -12   15.47    1.71
   1   0 -12   13.48    1.64
   0   1 -12   14.76    1.73
   1   0 -13    4.86    1.11
   0   1 -13    2.46    0.76
  -1   0 -13    5.37    1.12
   1   0 -14   15.86    2.00
  -1   0 -14   12.55    1.72
   0   1 -14   11.36    1.66
   1  -1   1    8.31    0.32
   1   1   1    7.60    0.39
  -1  -1  -1    7.72    0.37
   1  -1  -2  222.57    3.45
  -1   1   2  224.41    3.46
   1   1   2  215.99    3.23
  -1  -1  -2  215.19    3.22
  -1  -1  -2  214.58    3.43
   1   1   2  218.69    3.45
   1  -1   2  219.89    3.22
  -1   1  -2  212.01    3.19
   1   1   3   41.51    1.29
   1  -1   3   43.41    1.31
   1  -1  -3   39.99    1.37
  -1   1   3   44.21    1.44
  -1  -1  -3   40.46    1.28
  -1  -1  -3   42.79    1.39
   1   1   3   41.46    1.41
  -1   1  -3   40.74    1.25
   1  -1  -4   56.52    1.89
   1  -1  -4   56.37    1.86
   1  -1   4   56.67    1.72
   1   1   4   55.68    1.84
  -1   1   4   53.68    1.82
  -1  -1  -4   54.63    1.74
  -1  -1  -4   56.12    1.80
  -1   1  -4   54.71    1.68
   1   1  -5    0.69    0.38
   1  -1  -5    0.91    0.39
  -1  -1  -5    0.37    0.34
   1   1  -5    0.68    0.34
  -1  -1  -5    0.58    0.32
   1  -1  -5    0.89    0.36
  -1   1  -5    0.01    0.26
   1   1   5    0.60    0.36
  -1  -1  -6    6.09    0.72
   1  -1  -6    6.49    0.77
   1   1  -6    5.87    0.79
  -1   1  -6    5.81    0.73
  -1  -1  -6    6.55    0.77
   1  -1  -6    7.30    0.86
  -1   1  -6    6.65    0.72
   1   1  -6    6.96    0.78
  -1  -1  -7    1.25    0.40
   1  -1  -7    1.93    0.57
  -1   1  -7    2.38    0.60
   1   1  -7    1.78    0.55
   1  -1  -7    2.93    0.60
   1   1  -7    1.57    0.49
  -1  -1  -7    2.88    0.56
  -1   1  -7    1.55    0.42
  -1   1  -8    0.33    0.37
   1  -1  -8    0.08    0.40
   1   1  -8    0.13    0.40
  -1  -1  -8   -0.58    0.42
  -1  -1  -8    0.28    0.46
   1   1  -8   -0.53    0.41
  -1   1  -8    0.80    0.41
   1  -1  -8   -0.16    0.38
   1  -1  -9    2.91    0.67
  -1  -1  -9    1.55    0.53
  -1   1  -9    3.31    0.77
   1   1  -9    2.55    0.72
   1   1  -9    3.01    0.64
  -1  -1  -9    3.84    0.85
  -1   1  -9    3.62    0.76
   1  -1  -9    4.14    0.77
  -1  -1 -10    1.35    0.49
   1  -1 -10    1.66    0.56
   1   1 -10    2.02    0.73
  -1   1 -10    1.88    0.71
  -1  -1 -11    0.56    0.55
   1   1 -11   -1.44    0.84
  -1   1 -11    0.40    0.55
   1  -1 -11   -0.43    0.59
   1  -1 -12   -0.83    0.73
   1   1 -12    0.43    0.67
  -1   1 -12    0.47    0.67
  -1  -1 -12   -0.37    0.63
   1   1 -13    0.74    0.62
  -1   1 -13    0.52    0.66
  -1   1 -14    0.40    0.86
   1   1 -14   -0.63    0.68
  -1   1 -15    0.07    0.83
  -1  -2   0    1.01    0.13
   1   2   0    0.68    0.11
  -2   1  -1  882.80   10.57
   2  -1   1  898.35   10.57
  -1  -2  -1  889.09   10.73
   1   2   1  902.03   10.74
  -2   1  -2  287.34    4.10
   2  -1  -2  302.22    4.41
  -2   1   2  287.80    4.37
   1   2   2  297.58    4.41
   2  -1   2  272.58    4.03
  -1  -2  -2  287.43    4.37
   2  -1  -3  690.25    9.34
  -2   1   3  693.48    9.38
   1   2   3  702.06    9.02
   2  -1   3  695.42    9.03
   1   2   3  698.15    9.38
  -2   1  -3  644.35    8.82
  -1  -2  -3  681.47    9.31
  -1  -2  -4   74.89    2.07
   1   2   4   79.38    2.30
   1   2   4   79.48    2.14
  -2   1   4   78.80    2.29
   2  -1  -4   77.05    2.26
  -1  -2  -4   79.98    2.28
  -2   1  -4   78.47    2.08
   2  -1   4   79.74    2.13
   1   2  -5  201.31    4.02
   1   2   5  188.48    4.28
   1   2   5  201.91    4.13
   2  -1   5  222.30    4.40
   2  -1  -5  190.55    4.25
  -1  -2  -5  195.23    4.03
  -2   1  -5  199.10    4.04
  -1  -2  -5  195.10    4.26
   2  -1  -6   18.51    1.29
  -1  -2  -6   20.24    1.27
  -2   1  -6   21.40    1.31
   1   2  -6   21.44    1.32
   2  -1   6   19.52    1.24
   2  -1  -6   20.44    1.34
  -1  -2  -6   19.01    1.28
  -2   1  -6   19.95    1.21
  -2   1  -7  216.81    5.02
   2  -1  -7  232.44    5.33
   1   2  -7  210.40    5.21
   2  -1  -7  204.84    5.07
  -1  -2  -7  210.83    4.88
   1   2  -7  221.30    4.91
  -1  -2  -7  215.83    5.13
  -2   1  -7  217.82    4.87
   2  -1  -8   18.68    1.53
  -1  -2  -8   13.40    1.21
   1   2  -8   17.31    1.48
  -2   1  -8   14.46    1.29
   2  -1  -8   13.90    1.30
  -1  -2  -8   14.97    1.30
  -2   1  -8   15.61    1.26
   1   2  -8   14.90    1.24
  -2   1  -9   23.34    1.70
  -1  -2  -9   22.05    1.65
   2  -1  -9   21.47    1.73
   1   2  -9   24.95    1.90
   1   2  -9   25.06    1.70
  -2   1  -9   23.67    1.72
   2  -1 -10    7.40    1.10
  -1  -2 -10    8.27    1.10
  -2   1 -10    7.44    1.06
   1   2 -10   10.05    1.32
   1   2 -11   19.55    1.88
   2  -1 -11   19.18    1.80
  -2   1 -11   20.25    1.82
   1   2 -12   35.04    2.64
  -2   1 -12   34.83    2.48
   2  -1 -12   29.87    2.46
   1   2 -13    3.68    0.99
  -2   1 -13    4.88    1.01
  -2   1 -14    1.29    0.96
   1   2 -14    2.03    0.88
  -2   1 -15    3.36    0.96
   2   0   0    3.04    0.26
   2   0   1    8.80    0.42
  -2   0  -1    8.56    0.41
  -2   0   1    8.16    0.42
   0   2   1    9.02    0.45
   2   0  -1    8.47    0.42
   0  -2  -1    9.26    0.44
  -2   0  -2   24.67    0.87
   0   2   2   22.71    0.93
   2   0  -2   24.21    0.93
   0   2  -2   23.35    0.70
   2   0   2   23.20    0.85
   0  -2  -2   23.04    0.89
   0   2  -3  121.41    2.39
   2   0  -3  114.14    2.59
   0   2   3  116.96    2.47
   2   0   3  114.92    2.47
   0  -2  -3  109.14    2.54
  -2   0  -3  112.45    2.40
  -2   0  -4  148.29    3.06
   2   0  -4  144.90    3.31
   0   2   4  147.40    3.18
   0  -2  -4  142.39    3.11
   0   2  -4  141.39    2.93
   2   0   4  144.96    3.13
  -2   0  -4  145.17    3.09
   0  -2  -4  147.28    3.31
   2   0   5   39.41    1.69
   0   2   5   31.57    1.49
  -2   0  -5   35.75    1.52
   2   0  -5   33.76    1.60
   0  -2  -5   30.86    1.45
   0   2  -5   33.58    1.43
  -2   0  -5   32.07    1.46
   0  -2  -5   33.95    1.59
   2   0  -6   55.31    2.20
  -2   0  -6   54.80    2.10
   0  -2  -6   53.01    2.10
   2   0  -6   54.35    2.23
   2   0   6   54.81    2.13
   0  -2  -6   58.01    2.29
  -2   0  -6   54.79    2.12
   0   2  -6   55.76    2.03
   0  -2  -7    2.48    0.59
  -2   0  -7    1.88    0.49
   2   0  -7    2.31    0.62
   0  -2  -7    2.54    0.60
   0   2  -7    1.58    0.41
  -2   0  -7    3.82    0.62
   2   0   7    1.80    0.50
   2   0  -7    1.91    0.51
   2   0  -8   28.34    1.85
  -2   0  -8   26.57    1.70
   2   0  -8   33.45    2.04
   0   2  -8   27.84    1.85
   0  -2  -8   26.71    1.73
  -2   0  -8   26.96    1.70
   0   2  -8   31.83    1.78
   0  -2  -8   29.90    1.86
   0   2  -9  101.10    3.80
  -2   0  -9   99.38    3.57
   0  -2  -9   94.90    3.52
   2   0  -9   95.28    3.70
   2   0  -9   98.13    3.65
  -2   0  -9   99.06    3.58
   0   2  -9  103.15    3.53
  -2   0 -10    2.86    0.67
   0  -2 -10    1.82    0.59
   0   2 -10    2.17    0.66
   2   0 -10    2.28    0.78
   2   0 -11  109.13    4.40
  -2   0 -11  112.69    4.26
   0   2 -11  106.95    4.35
  -2   0 -12    2.24    0.71
   2   0 -12    2.47    0.76
   0   2 -12    4.21    1.01
  -2   0 -13   51.16    3.16
   2   0 -13   58.67    3.49
   0   2 -13   60.46    3.55
   0   2 -14    2.20    1.05
  -2   0 -14    1.84    0.88
   2   0 -14    1.68    1.28
   2   1   0    0.23    0.12
  -2  -1   0    0.05    0.10
  -2  -1  -1 1200.27   14.14
   2   1   1 1194.76   14.16
  -2  -1  -2  131.22    2.10
   2   1   2  127.22    2.12
  -2  -1  -2  127.23    2.44
   1  -2   2  131.55    2.09
  -1   2  -2  129.09    2.07
   2   1   2  130.19    2.46
  -1   2   3  144.18    2.89
   1  -2  -3  143.24    2.97
  -2  -1  -3  136.52    2.57
   1  -2   3  145.40    2.65
   2   1   3  141.43    2.90
  -2  -1  -3  141.98    2.87
  -1   2  -3  140.14    2.55
  -1   2   4   44.43    1.64
   1  -2  -4   46.11    1.71
   1  -2  -4   46.23    1.65
   2   1  -4   47.82    1.77
   1  -2   4   44.63    1.47
  -2  -1  -4   42.39    1.45
  -1   2  -4   45.47    1.45
  -2  -1  -4   44.11    1.63
   2   1   4   43.97    1.63
  -2  -1  -5  218.86    4.33
   1  -2  -5  229.82    4.62
   2   1   5  243.01    4.81
   2   1  -5  228.43    4.81
  -1   2   5  230.72    4.67
   1  -2  -5  240.76    4.87
  -2  -1  -5  223.70    4.55
  -1   2  -5  219.99    4.27
  -2  -1  -6    0.17    0.30
   1  -2  -6    0.16    0.36
   2   1  -6    0.59    0.40
   1  -2  -6    0.11    0.30
   2   1  -6    0.34    0.37
  -1   2  -6    0.48    0.33
   2   1   6   -0.12    0.36
  -2  -1  -6    0.70    0.35
   1  -2  -7   84.18    2.98
  -2  -1  -7   88.03    2.91
   2   1  -7   91.85    3.24
   2   1  -7   89.64    3.03
   2   1   7   88.39    3.05
  -1   2  -7   88.80    2.85
   1  -2  -7   93.20    3.19
  -2  -1  -7   95.58    3.13
  -1   2  -8    1.19    0.58
   2   1  -8   -0.13    0.59
  -2  -1  -8    0.57    0.44
   1  -2  -8    1.31    0.54
   1  -2  -8    1.83    0.59
  -1   2  -8    0.02    0.38
   2   1  -8    1.71    0.59
  -2  -1  -8    0.86    0.49
   1  -2  -9   68.89    3.01
   2   1  -9   65.86    3.06
  -1   2  -9   73.38    3.17
  -2  -1  -9   67.80    2.90
   2   1  -9   73.79    3.09
  -1   2  -9   67.66    2.81
  -2  -1  -9   69.24    3.00
   1  -2 -10    5.24    0.98
  -1   2 -10    5.76    1.03
  -2  -1 -10    3.72    0.81
   2   1 -10    3.81    0.82
  -2  -1 -11   11.10    1.35
  -1   2 -11   13.02    1.50
   2   1 -11   12.91    1.50
  -1   2 -12   19.40    1.95
   2   1 -12   18.68    1.96
  -2  -1 -12   19.42    1.86
   2   1 -13    9.35    1.48
  -1   2 -13   10.00    1.53
  -1   2 -14    3.06    0.98
   2   1 -14    2.66    0.89
   2   2   0 1171.77   13.71
  -2  -2   0 1168.29   13.71
   2  -2   1    3.11    0.25
  -2   2  -1    3.31    0.24
   2   2   1    3.58    0.34
  -2  -2  -1    3.62    0.34
  -2   2  -2 9973.85  111.15
   2  -2   2 9999.00  111.12
   2   2   2 9913.78  111.75
  -2  -2  -2 9899.30  111.76
   2   2   3  419.92    5.88
  -2   2   3  424.88    6.33
   2   2   3  415.35    6.33
  -2   2  -3  411.57    5.83
  -2  -2  -3  424.30    6.30
   2  -2   3  409.96    5.85
  -2  -2  -4  887.63   11.70
   2   2   4  898.77   11.80
  -2   2   4  904.55   12.27
   2  -2  -4  894.90   12.23
   2   2   4  906.48   12.26
  -2  -2  -4  900.19   12.25
  -2   2  -4  902.13   11.67
   2  -2   4  901.49   11.74
  -2   2   5   85.20    2.63
   2   2   5   87.44    2.70
   2  -2  -5   79.17    2.52
  -2  -2  -5   78.55    2.28
   2  -2   5   87.45    2.42
  -2  -2  -5   82.36    2.55
  -2   2  -5   79.53    2.27
   2  -2   6  314.20    5.79
  -2  -2  -6  292.54    5.66
   2   2   6  320.90    6.24
   2  -2  -6  310.62    6.11
   2   2  -6  320.05    5.93
  -2   2   6  315.45    6.24
   2  -2  -6  332.08    6.38
  -2  -2  -6  304.11    6.08
  -2   2  -6  309.60    5.72
   2  -2  -7   42.09    2.08
  -2  -2  -7   40.35    1.90
   2   2   7   42.46    2.11
   2   2  -7   41.24    2.16
   2   2  -7   40.24    1.94
   2  -2  -7   43.63    2.20
  -2  -2  -7   41.34    2.03
  -2   2  -7   41.47    1.90
   2  -2  -8  458.49    8.88
   2   2  -8  538.03    9.41
  -2  -2  -8  459.14    8.53
   2   2  -8  488.66    9.34
  -2   2  -8  485.83    9.00
   2  -2  -8  504.11    9.37
  -2   2  -8  475.23    8.57
  -2  -2  -8  486.35    9.05
  -2   2  -9    2.70    0.57
   2  -2  -9    3.08    0.72
   2   2  -9    4.51    0.88
  -2   2  -9    4.11    0.76
  -2  -2  -9    3.32    0.70
   2   2  -9    3.50    0.72
   2   2 -10  127.75    4.58
   2  -2 -10  121.44    4.39
  -2  -2 -10  118.14    4.11
  -2   2 -10  123.20    4.37
  -2   2 -11   -0.19    0.52
   2   2 -11   -0.30    0.60
  -2   2 -12   74.05    3.71
   2   2 -12   74.12    3.87
  -2   2 -13    0.56    0.62
   2   2 -13   -0.76    0.88
  -2   2 -14   10.91    1.60
   2   2 -14   11.29    1.77
  -2   2 -15    0.36    0.68
  -2  -3   0    0.31    0.15
   2   3   0    0.06    0.13
  -3   2  -1  119.84    2.08
   3  -2   1  119.23    2.07
   2   3  -1  121.13    1.98
  -2  -3  -1  120.58    2.24
   2   3   1  122.76    2.25
   3  -2   2  218.33    3.34
  -3   2  -2  208.79    3.31
  -2  -3  -2  206.98    3.60
   2   3   2  217.16    3.70
  -3   2  -3   55.98    1.52
  -3   2   3   57.99    1.79
   2   3   3   55.57    1.51
  -2  -3  -3   56.47    1.76
   2   3   3   59.44    1.83
   3  -2   3   55.50    1.52
  -3   2  -4  118.73    2.64
   2   3   4  119.03    2.67
  -3   2   4  122.08    3.02
  -2  -3  -4  116.08    2.97
   3  -2   4  123.74    2.71
   2   3   4  119.31    3.02
   2   3   5  114.00    3.25
   3  -2  -5  109.09    3.06
  -3   2   5  108.91    3.11
   2   3   5  111.81    2.84
  -3   2  -5  106.97    2.74
   3  -2   5  108.31    2.77
  -2  -3  -5  107.32    3.03
  -3   2  -6    4.06    0.55
   3  -2  -6    2.84    0.55
  -3   2   6    2.45    0.53
   2   3   6    2.79    0.52
   2   3  -6    3.45    0.56
   2   3   6    3.17    0.67
   3  -2   6    1.52    0.41
  -2  -3  -6    2.90    0.59
   2   3   7  136.78    4.01
   3  -2  -7  134.26    3.99
   3  -2   7  134.85    3.69
   2   3  -7  145.01    3.82
   3  -2  -7  156.47    4.33
  -3   2  -7  130.84    3.52
  -2  -3  -7  140.12    4.04
   3  -2  -8   26.82    1.82
   2   3  -8   24.49    1.66
   2   3  -8   26.15    1.86
   3  -2  -8   23.52    1.70
  -3   2  -8   22.97    1.62
  -3   2  -8   20.61    1.42
  -2  -3  -8   22.78    1.64
   3  -2  -9  111.36    4.03
  -3   2  -9  118.61    3.99
   2   3  -9  113.46    4.18
  -3   2  -9  110.21    3.60
   2   3  -9  115.85    3.81
   2   3 -10   27.39    2.11
  -3   2 -10   29.40    2.08
   3  -2 -10   28.54    2.13
  -3   2 -11   22.72    1.91
   2   3 -11   22.41    2.00
   2   3 -12   25.04    2.27
  -3   2 -12   19.91    1.88
  -3   2 -13    3.66    0.99
   2   3 -13    6.10    1.30
   2   3 -14    0.37    0.75
  -3   2 -14   -0.53    0.74
  -3   2 -15    1.03    0.94
   1   3   0    0.26    0.09
  -1  -3   0    0.31    0.12
   1   3  -1   55.58    0.97
  -3   1  -1   53.68    1.27
   3  -1   1   54.77    1.27
   1   3   1   54.12    1.29
  -1  -3  -1   55.93    1.29
  -3   1  -2   39.56    1.15
   3  -1   2   41.13    1.17
  -3   1   2   39.29    1.25
   3  -1  -2   40.31    1.27
  -1  -3  -2   40.30    1.27
   1   3   2   39.29    1.27
  -3   1  -3   19.78    0.89
   1   3   3   19.62    0.92
   3  -1  -3   19.66    1.02
  -3   1   3   19.48    1.02
   1   3   3   18.28    1.00
   3  -1   3   19.72    0.92
  -1  -3  -3   19.13    1.00
  -3   1  -4    1.13    0.34
   3  -1  -4    0.78    0.34
  -3   1   4    0.96    0.31
   1   3   4    1.13    0.31
  -1  -3  -4    1.34    0.36
   1   3   4    1.31    0.41
   3  -1   4    0.70    0.32
  -3   1  -5   -0.16    0.32
   1   3   5    0.47    0.30
   3  -1  -5    0.55    0.34
  -1  -3  -5    0.33    0.30
   1   3   5    0.21    0.34
   1   3  -5   -0.09    0.27
   3  -1   5    0.14    0.35
   1   3  -6   27.76    1.45
   3  -1  -6   22.73    1.46
   1   3   6   24.21    1.40
   3  -1   6   23.30    1.37
  -3   1  -6   22.62    1.29
  -1  -3  -6   24.93    1.51
  -3   1  -7    5.08    0.71
   3  -1  -7    5.85    0.81
  -3   1  -7    6.18    0.81
   1   3  -7    5.80    0.72
  -1  -3  -7    6.43    0.84
   3  -1   7    5.46    0.74
   3  -1  -7    5.90    0.84
  -3   1  -8    8.40    0.97
  -3   1  -8    6.79    0.91
   3  -1  -8    7.23    0.97
   3  -1  -8    7.84    1.02
  -1  -3  -8    8.24    1.00
   1   3  -8    7.67    0.89
   3  -1   8    7.56    0.96
  -3   1  -9    0.35    0.42
   3  -1  -9   -0.29    0.59
   1   3  -9   -0.60    0.64
  -3   1  -9   -0.80    0.59
   1   3  -9   -0.35    0.48
  -3   1 -10    0.57    0.49
   3  -1 -10    0.22    0.54
   1   3 -10    0.90    0.55
   1   3 -10    0.42    0.47
   3  -1 -11    0.89    0.67
   1   3 -11    1.14    0.74
  -3   1 -11    0.49    0.51
  -3   1 -12    1.57    0.63
   1   3 -12    1.07    0.77
   3  -1 -12    2.15    0.84
   1   3 -13    2.44    0.79
  -3   1 -13    4.26    1.04
   1   3 -14    1.67    0.79
  -3   1 -14    1.52    0.87
  -3   1 -15    2.01    1.05
   3   0   0    0.07    0.16
   3   0   1 1166.97   13.68
  -3   0  -1 1146.25   13.64
   0   3   1 1128.66   13.55
   3   0  -1 1134.61   13.50
  -3   0   1 1123.23   13.53
   0  -3  -1 1121.77   13.52
  -3   0  -2  673.59    8.55
   3   0   2  668.69    8.55
   3   0  -2  655.85    8.66
  -3   0   2  644.55    8.66
   0   3  -2  636.12    7.85
   0   3   2  665.44    8.70
   0  -3  -2  663.35    8.68
  -3   0  -3    8.77    0.65
   3   0  -3    9.49    0.73
   0   3  -3    9.92    0.57
   0   3   3    8.57    0.64
   0  -3  -3    8.15    0.68
   3   0   3    9.22    0.65
   3   0  -4   36.17    1.56
  -3   0  -4   38.08    1.36
   0   3   4   38.27    1.47
  -3   0  -4   37.11    1.45
   0  -3  -4   36.25    1.56
   3   0   4   35.81    1.46
   0   3  -4   36.29    1.27
   3   0  -5  585.36    9.17
   0   3   5  593.58    8.92
  -3   0  -5  590.40    8.64
   3   0   5  600.55    8.91
   0  -3  -5  592.77    9.21
   0   3  -5  591.65    8.46
  -3   0  -5  531.26    8.46
   3   0   6   43.76    1.92
   3   0  -6   40.38    1.96
  -3   0  -6   43.05    1.82
   0   3   6   42.15    1.89
   0  -3  -6   44.53    2.02
   0   3  -6   40.73    1.69
  -3   0  -6   41.16    1.84
   3   0  -7  165.73    4.39
  -3   0  -7  159.55    4.05
   3   0   7  162.29    4.24
   3   0  -7  155.87    4.38
   0  -3  -7  161.65    4.39
   0   3  -7  160.29    3.93
  -3   0  -7  157.88    4.14
  -3   0  -8    0.22    0.40
   3   0  -8    1.05    0.57
  -3   0  -8    0.33    0.45
   0   3  -8    0.19    0.33
   0  -3  -8    0.76    0.43
   3   0   8   -0.48    0.44
   3   0  -8    0.28    0.37
   3   0  -9  100.22    3.84
   0   3  -9  100.10    3.84
  -3   0  -9  103.41    3.60
   3   0  -9  115.71    4.14
  -3   0  -9  101.08    3.63
   0   3  -9  106.11    3.54
   3   0 -10   11.39    1.38
   0   3 -10    9.10    1.26
  -3   0 -10   10.69    1.24
   0   3 -10   13.24    1.32
   0   3 -11   38.11    2.60
  -3   0 -11   37.65    2.40
   3   0 -11   36.27    2.52
   3   0 -12    2.06    0.82
  -3   0 -12    1.97    0.75
   0   3 -12    0.78    0.68
   3   0 -13    8.64    1.47
   0   3 -13    8.20    1.41
  -3   0 -13    9.46    1.41
  -3   0 -14    2.62    0.93
   0   3 -14    3.23    1.08
   3   0 -14    4.34    1.26
   3   1   0  194.61    2.99
  -3  -1   0  186.19    2.97
  -3  -1  -1    0.74    0.21
   3   1   1    0.49    0.23
   3   1   2   92.18    2.05
  -3  -1  -2   87.04    1.98
  -3  -1  -2   89.35    1.51
  -1   3  -2   89.38    1.48
   1  -3   2   88.07    1.50
   3   1   3    0.39    0.29
  -3  -1  -3    0.54    0.27
   3   1  -3    0.98    0.32
  -3  -1  -3    0.90    0.23
  -1   3   3    1.30    0.34
   1  -3  -3    0.95    0.31
  -1   3  -3    0.63    0.21
   1  -3   3    1.21    0.24
  -3  -1  -4    0.42    0.30
  -3  -1  -4    0.61    0.29
   3   1  -4    1.07    0.42
  -1   3   4    0.94    0.33
   1  -3  -4    0.66    0.35
   3   1   4    0.04    0.33
  -1   3  -4    0.52    0.22
   1  -3  -5   18.18    1.25
  -3  -1  -5   15.79    0.96
   3   1  -5   15.82    1.16
  -1   3   5   15.41    1.07
  -3  -1  -5   15.73    1.03
  -1   3  -5   16.03    0.93
   3   1   5   17.20    1.14
   1  -3  -6   62.27    2.46
   3   1  -6   63.27    2.51
  -1   3   6   61.44    2.36
  -3  -1  -6   57.28    2.06
   3   1   6   58.86    2.31
  -1   3  -6   59.54    2.04
  -3  -1  -6   60.73    2.30
  -3  -1  -7    2.23    0.55
   3   1  -7    1.84    0.59
  -1   3   7    1.53    0.44
  -3  -1  -7    1.78    0.51
  -1   3  -7    2.21    0.49
   3   1   7    1.63    0.45
   1  -3  -7    2.43    0.62
  -3  -1  -8    7.42    0.95
   3   1  -8    7.23    0.97
  -3  -1  -8    8.02    0.93
   3   1  -8    8.18    1.01
   3   1   8    7.62    0.98
  -1   3  -8    8.61    0.92
   1  -3  -8    7.22    1.00
   3   1  -9   29.08    2.01
   3   1  -9   23.70    1.86
  -3  -1  -9   24.73    1.71
  -1   3  -9   27.27    1.98
  -1   3  -9   22.69    1.58
   3   1 -10   -0.02    0.52
  -1   3 -10    0.11    0.49
  -3  -1 -10    0.47    0.42
  -1   3 -10    0.50    0.44
   3   1 -11   -0.25    0.68
  -3  -1 -11   -0.52    0.61
  -1   3 -11   -0.24    0.60
  -3  -1 -12    0.11    0.50
   3   1 -12   -0.85    0.76
  -1   3 -12   -0.50    0.70
  -1   3 -13    0.34    0.66
   3   1 -13    0.52    0.68
  -1   3 -14    0.43    0.77
   3   1 -14    1.19    0.91
  -3  -2   0    0.21    0.16
   3   2   0   -0.21    0.19
   2  -3   1   75.23    1.28
   3   2   1   76.65    1.72
  -3  -2  -1   76.04    1.71
  -3  -2  -2   39.54    1.28
  -2   3  -2   37.24    0.92
   3   2   2   40.04    0.94
   2  -3   2   38.25    0.93
   3   2   2   39.31    1.30
  -3  -2  -3 1521.73   18.74
  -2   3  -3 1490.51   17.91
   3   2   3 1501.70   17.99
  -2   3   3 1530.00   18.74
   3   2   3 1536.12   18.79
   2  -3   3 1518.16   17.94
  -2   3   4   71.49    2.18
  -3  -2  -4   69.29    1.81
   3   2   4   66.81    1.83
  -2   3  -4   61.74    1.66
   2  -3   4   69.53    1.83
  -3  -2  -4   66.60    2.09
   3   2   4   69.32    2.17
  -2   3   5   17.62    1.16
   2  -3  -5   17.17    1.25
  -3  -2  -5   19.03    1.04
   2  -3   5   18.77    1.04
  -3  -2  -5   19.94    1.21
  -2   3  -5   18.00    0.98
   3   2   5   17.56    1.17
  -2   3   6   32.69    1.73
  -3  -2  -6   29.00    1.43
   3   2   6   32.76    1.74
   2  -3  -6   35.70    1.87
   3   2  -6   30.86    1.74
   2  -3   6   32.73    1.51
  -2   3  -6   28.45    1.39
  -3  -2  -6   31.84    1.68
   3   2  -7   47.01    2.32
   3   2   7   42.41    2.14
  -3  -2  -7   39.74    1.85
   2  -3  -7   49.73    2.46
  -2   3   7   44.24    2.17
  -3  -2  -7   44.25    2.15
  -2   3  -7   42.59    1.86
   3   2   8   54.45    2.60
   3   2  -8   58.99    2.58
  -3  -2  -8   56.56    2.40
   3   2  -8   59.86    2.81
   2  -3  -8   63.45    2.84
  -2   3  -8   56.41    2.34
  -3  -2  -8   59.98    2.66
   3   2  -9   42.02    2.38
  -2   3  -9   35.16    2.18
   3   2  -9   42.46    2.51
  -3  -2  -9   35.82    2.03
  -2   3  -9   38.05    2.06
  -2   3 -10   11.08    1.18
  -2   3 -10   15.21    1.53
   3   2 -10   14.57    1.56
  -3  -2 -10   13.46    1.36
   3   2 -11   20.01    1.98
  -2   3 -11   22.85    1.98
   3   2 -12    5.32    1.17
  -2   3 -12    5.87    1.13
  -2   3 -13    9.27    1.43
   3   2 -13   10.24    1.61
   3   2 -14    4.14    1.18
  -2   3 -14    4.16    1.11
  -3  -3   0   93.71    1.87
   3   3   0   96.31    1.91
   3   3  -1   33.23    1.00
   3  -3   1   32.46    0.88
   3   3   1   31.56    1.09
  -3  -3  -1   31.48    1.07
  -3   3  -2   25.10    0.82
  -3  -3  -2   23.65    1.02
   3  -3   2   24.69    0.82
   3   3   2   25.61    1.04
  -3  -3  -3   14.85    0.92
  -3   3  -3   13.51    0.68
   3   3   3   14.45    0.69
  -3   3   3   13.13    0.86
   3   3   3   13.78    0.91
   3  -3   3   13.28    0.68
  -3   3  -4   96.19    2.24
   3   3   4   99.20    2.31
  -3   3   4   98.18    2.69
   3   3   4   96.25    2.69
  -3  -3  -4   91.96    2.58
   3  -3   4   98.58    2.29
  -3   3  -5  131.44    2.99
   3   3   5  130.29    3.06
  -3   3   5  135.59    3.51
  -3  -3  -5  136.02    3.48
   3  -3   5  128.67    3.01
   3   3   5  133.98    3.48
   3   3   6   43.96    2.08
  -3   3   6   47.03    2.14
   3  -3   6   48.86    1.96
  -3   3  -6   46.40    1.80
  -3  -3  -6   47.04    2.11
  -3   3  -7    0.32    0.30
  -3  -3  -7    0.55    0.38
  -3   3   7   -0.26    0.43
   3   3   7   -0.37    0.47
   3  -3   7   -0.38    0.39
   3  -3  -7    0.27    0.42
   3   3   8   26.36    1.81
   3   3  -8   26.14    1.68
   3  -3  -8   28.63    1.96
   3   3  -8   25.01    1.85
  -3   3  -8   25.63    1.54
  -3  -3  -8   25.78    1.76
  -3   3  -9   -0.30    0.40
   3   3  -9    0.90    0.66
  -3   3  -9   -0.82    0.65
   3   3  -9   -0.41    0.45
  -3   3 -10    7.29    1.05
   3   3 -10    7.17    1.15
   3   3 -11    1.57    0.73
  -3   3 -11    0.92    0.64
  -3   3 -12    0.53    0.52
   3   3 -12    3.35    0.98
   3   3 -13   -0.66    0.73
  -3   3 -13    0.01    0.69
   3   3 -14    1.40    1.01
  -3   3 -14    0.71    0.73
  -3   3 -15    1.31    0.93
  -3  -4   0    0.14    0.16
   3   4   0    0.28    0.21
   4  -3   1   15.53    0.70
   3   4  -1   14.89    0.66
   3   4   1   16.84    0.81
  -3  -4  -1   16.01    0.77
  -4   3  -2  308.41    4.57
   4  -3   2  310.82    4.59
  -3  -4  -2  313.23    5.02
   3   4   2  310.41    5.03
  -4   3  -3 2002.52   24.06
  -3  -4  -3 2027.83   24.78
   4  -3   3 2051.90   24.09
  -4   3   3 2040.79   24.80
   3   4   3 2047.45   24.84
  -4   3  -4   98.21    2.33
  -4   3   4   97.00    2.74
   3   4   4   95.27    2.31
  -3  -4  -4   90.55    2.61
   3   4   4   97.32    2.76
   4  -3   4   95.28    2.35
  -4   3  -5  395.62    6.40
   3   4   5  398.74    6.48
  -4   3   5  406.03    7.15
   4  -3   5  391.76    6.43
   3   4   5  409.09    7.17
  -3  -4  -5  399.48    7.08
  -4   3  -6   16.98    1.09
  -4   3   6   18.36    1.36
   3   4   6   19.68    1.22
   3   4   6   17.50    1.35
  -3  -4  -6   17.14    1.29
   4  -3   6   19.45    1.21
  -4   3  -7   81.02    2.69
   3   4   7   79.19    3.06
   4  -3   7   86.69    2.96
  -4   3   7   89.87    3.25
  -3  -4  -7   82.74    3.10
  -3  -4  -8    9.81    1.09
  -4   3  -8   10.44    1.02
   4  -3  -8   12.32    1.31
   3   4  -8    9.54    0.99
   4  -3   8   10.53    1.04
   3   4   8   10.28    1.20
  -4   3  -9  142.92    4.22
  -4   3  -9  146.03    4.51
   3   4  -9  160.32    4.76
   3   4  -9  152.07    4.99
  -4   3 -10   15.11    1.52
   3   4 -10   15.06    1.69
   3   4 -11   13.48    1.71
  -4   3 -11   14.75    1.59
   3   4 -12    0.83    0.67
  -4   3 -12   -0.23    0.56
  -4   3 -13   15.32    1.82
   3   4 -13   15.64    1.90
  -4   3 -14    2.97    0.99
   3   4 -14    3.93    1.17
  -4   3 -15    1.51    0.79
   2   4   0 1710.68   19.86
  -2  -4   0 1707.93   19.85
  -4   2  -1  537.57    7.18
   4  -2   1  555.10    7.19
   2   4  -1  540.36    6.76
  -2  -4  -1  547.10    7.21
   2   4   1  534.81    7.19
   4  -2   2  113.69    2.29
  -4   2  -2  112.22    2.28
  -4   2   2  115.38    2.49
   2   4   2  114.92    2.51
  -2  -4  -2  116.17    2.48
  -2  -4  -3    3.54    0.48
   4  -2   3    2.98    0.38
  -4   2  -3    3.15    0.40
  -4   2   3    4.62    0.56
   2   4   3    3.02    0.47
  -4   2  -4  430.20    6.56
   2   4   4  433.44    6.57
  -4   2   4  428.41    7.08
   2   4   4  422.19    7.11
   4  -2   4  434.65    6.62
  -2  -4  -4  434.48    7.10
  -4   2  -5   75.51    2.27
   2   4   5   89.90    2.98
   4  -2  -5   73.38    2.53
  -4   2   5   79.33    2.64
   2   4   5   78.53    2.34
   4  -2   5   81.89    2.38
  -2  -4  -5   76.95    2.58
  -4   2  -6   96.70    2.83
   2   4  -6  100.82    2.81
   2   4   6  104.47    2.98
   2   4   6   97.58    3.20
   4  -2  -6   96.48    3.15
  -4   2   6  100.27    3.26
  -2  -4  -6  101.28    3.21
   4  -2   6  100.60    2.91
  -4   2  -7  128.40    3.54
   2   4   7  129.05    3.97
   2   4   7  134.35    3.72
   4  -2   7  135.77    3.72
   2   4  -7  130.13    3.54
   4  -2  -7  123.67    3.87
  -2  -4  -7  130.74    3.94
  -4   2  -8   24.96    1.58
   4  -2  -8   25.67    1.82
   2   4  -8   26.33    1.62
   4  -2  -8   23.56    1.74
   4  -2   8   22.99    1.56
  -4   2  -8   24.68    1.64
  -2  -4  -8   24.83    1.75
   4  -2   9   29.96    1.89
   4  -2  -9   29.06    2.05
   2   4  -9   29.86    2.12
  -4   2  -9   30.20    1.95
  -4   2  -9   31.57    1.90
   2   4  -9   29.38    1.85
  -4   2 -10   17.60    1.59
   2   4 -10   17.13    1.72
   2   4 -10   14.26    1.38
  -4   2 -11   97.26    3.97
   2   4 -11  105.96    4.51
  -4   2 -12   -1.55    0.78
   2   4 -12   -0.53    0.64
  -4   2 -13    9.02    1.39
   2   4 -13    7.85    1.46
  -4   2 -14   -1.00    0.74
   2   4 -14    0.02    0.67
  -4   2 -15   12.48    1.76
  -1  -4   0   -0.24    0.14
   1   4   0    0.26    0.12
   4  -1   1  842.26   10.44
   1   4  -1  827.71    9.62
  -4   1  -1  819.50   10.43
  -4   1   1  832.61   10.29
   1   4   1  829.23   10.31
  -1  -4  -1  823.47   10.27
   4  -1   2 1571.40   18.74
  -4   1  -2 1558.29   18.75
  -4   1   2 1562.59   18.89
  -1  -4  -2 1546.94   18.87
   4  -1   3  355.00    5.52
  -4   1  -3  352.67    5.50
  -4   1   3  355.88    5.82
   1   4   3  364.63    5.88
   4  -1  -3  365.32    5.80
  -1  -4  -3  358.63    5.80
  -4   1  -4    1.22    0.30
   1   4   4    2.26    0.41
  -4   1   4    1.36    0.38
   4  -1  -4    1.04    0.37
   1   4   4    2.26    0.49
  -1  -4  -4    1.72    0.41
   4  -1   4    1.31    0.38
  -4   1  -5  452.22    7.30
   1   4  -5  451.76    6.91
   1   4   5  460.43    7.76
   4  -1  -5  443.31    7.68
   1   4   5  461.46    7.37
   4  -1   5  465.51    7.39
  -1  -4  -5  456.83    7.77
  -4   1  -6   58.33    2.17
   4  -1  -6   56.08    2.33
   1   4   6   55.32    2.17
   1   4  -6   61.47    2.16
   4  -1   6   57.52    2.19
  -1  -4  -6   55.90    2.33
   4  -1  -7   18.58    1.45
   1   4   7   20.43    1.40
   4  -1   7   20.72    1.42
  -4   1  -7   22.65    1.43
  -1  -4  -7   20.35    1.49
  -4   1  -7   20.73    1.39
   1   4  -7   21.28    1.31
  -4   1  -8   13.30    1.20
   4  -1  -8   11.13    1.18
   4  -1   8   11.95    1.17
   4  -1  -8   12.21    1.20
  -4   1  -8   12.09    1.13
   1   4  -8   11.78    1.08
  -1  -4  -8   12.69    1.26
  -4   1  -9    3.45    0.71
  -4   1  -9    2.16    0.62
   4  -1  -9    1.54    0.61
   4  -1   9    2.39    0.63
   1   4  -9    2.15    0.58
  -4   1 -10    1.00    0.53
   1   4 -10    3.35    0.87
   4  -1 -10    0.36    0.52
   1   4 -10    1.57    0.45
   1   4 -11   10.70    1.47
  -4   1 -11   10.22    1.26
   4  -1 -11    9.25    1.41
   4  -1 -12   17.82    1.94
   1   4 -12   15.51    1.87
  -4   1 -12   15.75    1.65
  -4   1 -13    5.55    1.09
   1   4 -13    4.74    1.10
   1   4 -14   13.55    2.12
  -4   1 -14   14.20    1.77
  -4   1 -15    5.66    1.25
   4   0   0 6487.71   68.60
  -4   0   0 6019.62   67.74
   0   4   0 5972.87   67.77
   0  -4   0 6029.87   67.73
   4   0   1 2738.50   31.13
  -4   0  -1 2749.68   31.10
  -4   0   1 2662.41   30.82
   0   4   1 2624.09   30.82
   4   0  -1 2733.54   30.79
   0  -4  -1 2614.28   30.80
   4   0   2  993.62   12.12
  -4   0   2  928.36   12.10
   0   4   2  943.42   12.15
   4   0  -2  950.86   12.09
   0  -4  -2  938.19   12.08
  -4   0  -3  375.90    5.76
   4   0  -3  365.88    5.90
   0   4  -3  357.94    4.96
   0  -4  -3  369.73    5.90
   4   0   3  373.09    5.76
  -4   0  -4 1514.53   19.03
  -4   0  -4 1489.31   18.44
   0   4   4 1578.43   19.11
   4   0  -4 1491.55   19.37
   0  -4  -4 1513.92   19.41
   4   0   4 1565.87   19.15
   0   4  -4 1479.77   18.24
  -4   0  -5    7.58    0.74
   4   0  -5    5.88    0.70
  -4   0  -5    8.57    0.73
   0   4   5    7.33    0.77
   0  -4  -5    7.93    0.82
   4   0   5    8.25    0.82
   0   4  -5    8.66    0.67
  -4   0  -6  915.17   13.06
   4   0  -6  897.86   13.46
  -4   0  -6  907.26   12.68
   0   4   6  916.82   13.14
   0  -4  -6  936.49   13.58
   0   4  -6  885.12   12.35
   4   0   6  882.73   13.00
  -4   0  -7    4.58    0.71
  -4   0  -7    5.18    0.69
   0   4   7    4.90    0.72
   4   0  -7    4.27    0.78
   0  -4  -7    4.91    0.75
   4   0   7    4.80    0.67
   0   4  -7    5.48    0.69
  -4   0  -8  271.94    5.94
   4   0   8  279.28    6.30
   4   0  -8  297.36    6.61
   4   0  -8  269.71    6.52
   0   4  -8  282.79    5.84
  -4   0  -8  285.72    6.27
   0  -4  -8  292.32    6.66
  -4   0  -9   -0.62    0.58
   4   0  -9   -0.39    0.54
  -4   0  -9   -0.51    0.46
   0   4  -9    0.26    0.35
   4   0   9    0.35    0.48
  -4   0 -10  151.83    4.68
   4   0 -10  155.87    5.15
   0   4 -10  155.56    5.18
   0   4 -10  149.07    4.50
   4   0 -11   -0.12    0.67
   0   4 -11    0.62    0.57
  -4   0 -11    0.76    0.50
   0   4 -12   53.09    3.28
   4   0 -12   51.28    3.20
  -4   0 -12   49.74    2.90
   4   0 -13    3.98    1.11
  -4   0 -13    2.59    0.94
   0   4 -13    1.90    0.91
   0   4 -14   22.53    2.32
  -4   0 -14   26.26    2.37
   4   1   0    0.04    0.10
   4   1   0    0.21    0.23
  -4  -1   0   -0.30    0.20
   4   1   1   49.59    1.41
   4   1  -1   47.62    1.23
  -4  -1  -1   48.49    1.39
   4   1   2  559.59    7.84
  -4  -1  -2  559.38    7.81
   1  -4  -2  562.91    7.82
   4   1  -2  549.51    7.78
  -4  -1  -2  575.59    6.75
  -4  -1  -3  934.16   12.12
  -4  -1  -3  890.55   11.13
   4   1  -3  916.95   12.24
   1  -4  -3  945.28   12.30
  -1   4  -3  910.60   11.04
   4   1   3  921.42   12.05
  -4  -1  -4   50.70    1.81
  -1   4   4   56.45    1.88
   1  -4  -4   56.59    2.06
  -4  -1  -4   49.86    1.48
   4   1  -4   51.57    1.95
  -1   4  -4   51.69    1.44
   4   1   4   52.22    1.86
  -4  -1  -5  170.14    3.92
  -1   4   5  181.84    4.03
   1  -4  -5  185.67    4.30
  -4  -1  -5  163.69    3.44
   4   1  -5  179.25    4.24
  -1   4  -5  168.29    3.37
   4   1   5  171.88    3.97
   4   1  -6   19.62    1.41
  -1   4   6   18.58    1.28
  -4  -1  -6   19.36    1.14
   4   1   6   20.12    1.36
   1  -4  -6   19.12    1.37
  -4  -1  -6   18.70    1.27
  -1   4  -6   18.20    1.06
   4   1  -7  116.20    3.74
  -1   4   7  114.27    3.59
  -4  -1  -7  109.73    3.17
   1  -4  -7  120.68    3.82
  -4  -1  -7  117.35    3.56
   4   1   7  108.21    3.47
  -1   4  -7  109.91    3.08
  -1   4   8   20.04    1.53
   4   1   8   19.93    1.55
  -4  -1  -8   19.07    1.38
   4   1  -8   18.37    1.55
  -1   4  -8   17.88    1.27
  -4  -1  -8   19.11    1.46
   1  -4  -8   21.57    1.66
   4   1   9   33.82    2.12
  -4  -1  -9   32.33    1.93
   4   1  -9   33.45    2.23
   4   1  -9   39.45    2.26
  -1   4  -9   35.22    1.92
  -1   4 -10   39.89    2.51
  -4  -1 -10   36.22    2.17
   4   1 -10   41.82    2.63
  -1   4 -10   37.89    2.14
   4   1 -11    7.32    1.20
  -1   4 -11    7.60    1.18
  -4  -1 -11    7.88    1.11
  -4  -1 -12    0.87    0.63
  -1   4 -12    0.35    0.58
   4   1 -12    1.50    0.85
  -1   4 -13    9.66    1.60
   4   1 -13    6.89    1.28
   4   1 -14    8.58    1.49
  -1   4 -14    7.62    1.48
  -4  -2   0   89.01    1.95
   4   2   0   88.77    1.95
   2  -4   1  347.53    4.40
  -4  -2  -1  364.30    5.30
   4   2   1  363.24    5.30
  -4  -2  -2    3.99    0.43
   4   2   2    4.12    0.49
  -2   4  -2    3.55    0.24
   4   2   2    3.89    0.26
   2  -4   2    4.26    0.28
  -4  -2  -3  205.50    3.94
  -2   4  -3  198.59    3.10
   4   2   3  203.14    3.19
   2  -4   3  210.76    3.18
   4   2   3  192.37    3.76
  -2   4  -4    0.74    0.22
  -4  -2  -4    1.18    0.36
  -2   4   4    1.01    0.37
   2  -4   4    1.14    0.30
   4   2   4    0.71    0.35
  -4  -2  -5  186.76    4.17
  -2   4   5  189.41    4.23
  -4  -2  -5  173.23    3.52
   2  -4   5  185.89    3.61
   2  -4  -5  189.11    4.43
   4   2  -5  186.44    4.38
   4   2   5  183.05    4.18
  -2   4  -5  173.04    3.43
  -2   4  -6    0.73    0.32
  -4  -2  -6    0.29    0.31
  -4  -2  -6    0.04    0.33
   4   2  -6    0.49    0.41
  -2   4   6    0.91    0.48
   4   2   6    0.59    0.51
   2  -4  -6    0.41    0.35
   2  -4  -7  208.81    5.31
  -4  -2  -7  167.56    4.05
  -2   4   7  182.13    4.74
   4   2  -7  172.77    4.80
  -2   4  -7  173.27    4.01
   4   2   7  174.96    4.64
  -4  -2  -7  177.09    4.57
  -4  -2  -8    0.72    0.45
  -2   4  -8    1.08    0.39
  -4  -2  -8    0.53    0.34
   4   2  -8    0.54    0.42
  -2   4   8    0.65    0.43
   2  -4  -8    1.13    0.40
   4   2   8    1.34    0.52
   4   2  -9   89.93    3.46
   4   2   9   84.84    3.47
  -4  -2  -9   85.19    3.14
   4   2  -9   90.05    3.70
  -2   4  -9   85.60    3.08
  -2   4 -10    2.16    0.55
   4   2 -10    1.95    0.76
  -4  -2 -10    2.10    0.61
  -2   4 -10    1.09    0.53
   4   2 -11   28.87    2.30
  -2   4 -11   26.03    2.14
  -2   4 -12    0.03    0.59
   4   2 -12    0.64    0.67
  -2   4 -13   20.86    2.13
   4   2 -13   20.36    2.21
   4   2 -14   -0.59    0.79
  -2   4 -14    0.33    0.74
   4   3   0   -0.03    0.23
  -4  -3   0    0.14    0.19
   4   3  -1  108.20    2.29
   3  -4   1  111.46    1.93
  -4  -3  -1  119.34    2.46
   4   3   1  121.85    2.48
  -3   4  -2  483.65    6.22
  -4  -3  -2  485.72    7.08
   4   3   2  487.01    7.12
   3  -4   2  480.22    6.20
  -4  -3  -3  321.48    5.48
  -3   4  -3  315.13    4.62
   4   3   3  326.02    4.64
   4   3   3  335.14    5.55
   3  -4   3  318.33    4.65
  -4  -3  -4  497.49    7.82
  -3   4  -4  488.22    6.86
   4   3   4  483.78    6.94
  -3   4   4  502.11    7.81
   3  -4   4  486.73    6.91
   4   3   4  477.17    7.80
  -4  -3  -5  218.04    4.67
  -3   4  -5  207.54    3.91
   4   3   5  204.97    4.01
  -3   4   5  213.77    4.68
   3  -4   5  211.47    4.01
   4   3   5  209.70    4.63
  -3   4  -6    0.62    0.28
  -4  -3  -6    1.15    0.49
  -3   4   6    0.87    0.42
   4   3   6    1.10    0.47
   3  -4  -6    0.22    0.37
   3  -4   6    1.26    0.39
   3  -4   7  285.36    5.62
  -3   4   7  292.00    6.40
   4   3  -7  286.19    6.54
   3  -4  -7  304.13    6.62
  -4  -3  -7  284.37    6.21
   4   3   7  279.97    6.28
  -3   4  -7  279.12    5.52
  -3   4  -8    0.65    0.41
  -4  -3  -8    0.25    0.45
  -3   4   8    0.17    0.37
   4   3  -8   -0.58    0.58
   4   3   8    0.23    0.48
   3  -4  -8   -0.37    0.54
   4   3  -9   26.06    1.99
   4   3  -9   23.45    1.73
   4   3   9   25.85    1.92
  -3   4  -9   25.19    1.63
  -3   4 -10    5.14    0.82
  -3   4 -10    7.05    1.20
   4   3 -10    7.15    1.13
  -3   4 -11   66.05    3.38
   4   3 -11   64.87    3.54
  -3   4 -12    0.26    0.54
   4   3 -12    0.82    0.71
   4   3 -13   13.08    1.81
  -3   4 -13   14.93    1.79
  -3   4 -14    4.75    1.20
   4   3 -14    4.56    1.28
  -4  -4   0  929.14   11.72
   4   4   0  927.14   11.75
   4  -4   1  125.56    2.31
   4   4  -1  128.91    2.51
  -4  -4  -1  126.38    2.65
   4   4   1  128.39    2.68
  -4   4  -2 1148.08   13.89
   4   4   2 1161.12   14.69
   4  -4   2 1132.44   13.86
  -4  -4  -2 1144.43   14.63
  -4   4  -3  144.47    2.72
  -4  -4  -3  144.45    3.30
   4  -4   3  148.39    2.75
   4   4   3  151.31    3.36
  -4   4  -4 1534.16   18.77
  -4  -4  -4 1517.45   19.83
  -4   4   4 1546.10   19.83
   4   4   4 1539.22   18.78
   4  -4   4 1552.49   18.83
   4   4   4 1526.01   19.85
  -4   4  -5   77.89    2.16
  -4  -4  -5   81.92    2.70
   4   4   5   75.26    2.17
  -4   4   5   81.02    2.71
   4   4   5   74.95    2.61
   4  -4   5   73.86    2.16
  -4   4  -6  816.50   11.57
  -4   4   6  847.36   12.77
   4   4   6  820.28   11.77
  -4  -4  -6  849.27   12.79
   4   4   6  807.65   12.63
   4  -4   6  828.99   11.75
  -4  -4  -7    2.09    0.54
  -4   4  -7    2.60    0.53
  -4   4   7    3.04    0.70
   4  -4   7    1.84    0.49
   4   4   7    1.91    0.55
   4  -4  -7    1.81    0.48
  -4   4  -8  351.18    6.83
   4  -4   8  362.60    7.02
   4   4   8  365.03    7.81
   4   4  -8  372.07    8.05
  -4   4  -9    1.76    0.54
   4   4  -9    0.66    0.61
   4   4  -9    2.78    0.69
   4   4   9    2.11    0.76
  -4   4 -10  143.51    4.40
   4   4 -10  157.75    5.41
  -4   4 -10  156.48    4.99
   4   4 -11    2.69    0.92
  -4   4 -11    1.22    0.58
  -4   4 -12   48.09    3.02
   4   4 -12   47.78    3.16
   4   4 -13    0.58    0.76
  -4   4 -13    0.32    0.77
  -4   4 -14   16.19    1.91
  -4   4 -15    1.69    0.98
   4   5   0    0.28    0.23
  -4  -5   0    0.08    0.20
   4   5  -1   47.97    1.39
   5  -4   1   47.75    1.40
  -4  -5  -1   48.97    1.55
   4   5   1   49.35    1.57
   4   5  -2   10.15    0.64
  -5   4  -2    8.61    0.60
  -4  -5  -2   10.82    0.77
   5  -4   2   10.21    0.62
   4   5   2   10.20    0.75
  -5   4  -3    6.28    0.54
   5  -4   3    5.93    0.53
  -4  -5  -3    5.88    0.65
   4   5   3    6.20    0.69
  -4  -5  -4  259.65    5.15
  -5   4  -4  250.00    4.42
  -5   4   4  263.76    5.18
   5  -4   4  245.98    4.38
   4   5   4  263.36    5.20
  -5   4  -5  133.73    3.10
  -4  -5  -5  131.71    3.65
   4   5   5  134.35    3.13
  -5   4   5  135.73    3.72
   4   5   5  134.08    3.68
   5  -4   5  136.73    3.16
  -5   4  -6    0.38    0.26
  -4  -5  -6    0.44    0.44
   4   5   6    0.45    0.28
  -5   4   6    0.03    0.35
   5  -4   6    0.17    0.29
   4   5   6    0.32    0.38
  -5   4  -7   65.66    2.38
   4   5   7   66.14    2.47
  -5   4   7   70.79    2.95
   4   5   7   65.53    2.87
  -4  -5  -7   69.27    2.83
   5  -4   7   69.28    2.50
  -5   4  -8   42.87    2.05
   4   5   8   43.10    2.43
   5  -4   8   46.84    2.20
  -5   4  -9   33.17    1.91
   5  -4   9   33.76    1.99
   4   5   9   31.08    2.20
   4   5  -9   30.94    1.93
   4   5 -10   27.65    2.26
  -5   4 -11   19.97    1.84
   4   5 -11   23.09    2.19
  -5   4 -12   -0.21    0.57
   4   5 -12   -0.60    0.80
  -5   4 -13    1.73    0.77
   4   5 -13    0.24    0.71
  -5   4 -14    4.19    1.10
  -5   4 -15    0.86    0.87
  -3  -5   0   25.35    0.92
   3   5   0   24.15    0.90
   3   5  -1   88.76    1.83
   5  -3   1   90.86    2.06
  -3  -5  -1   88.65    2.06
   3   5   1   94.44    2.12
  -5   3  -2   22.41    0.97
  -3  -5  -2   27.89    1.18
   5  -3   2   25.61    1.03
   3   5   2   26.03    1.16
  -3  -5  -3   11.64    0.87
   5  -3   3   10.21    0.70
  -5   3  -3   10.78    0.70
  -5   3   3   11.44    0.85
   3   5   3   11.50    0.86
  -5   3  -4   35.77    1.40
  -5   3   4   36.46    1.66
   5  -3   4   35.75    1.39
  -3  -5  -4   37.51    1.65
   3   5   4   37.78    1.69
  -5   3  -5   49.64    1.80
  -5   3   5   52.62    2.16
   3   5   5   50.69    1.82
   3   5   5   49.38    2.14
  -3  -5  -5   51.56    2.12
   5  -3   5   49.19    1.81
  -5   3  -6   54.81    2.07
   3   5   6   58.84    2.16
   3   5   6   59.34    2.54
  -5   3   6   62.71    2.57
   5  -3   6   58.35    2.15
  -3  -5  -6   59.07    2.46
  -3  -5  -7   12.23    1.20
  -5   3  -7   13.04    1.08
  -5   3   7   13.46    1.26
   3   5   7   13.34    1.12
   5  -3   7   12.99    1.10
   3   5   7   11.87    1.23
  -5   3  -8    5.70    0.78
   3   5  -8    6.74    0.84
   5  -3   8    8.11    1.02
   3   5   8    7.19    1.04
  -5   3  -9    6.37    0.88
   5  -3   9    8.52    1.04
   3   5  -9    7.82    1.04
   3   5 -10    0.76    0.65
  -5   3 -10    0.35    0.57
   3   5 -10    1.25    0.55
   3   5 -11    6.15    1.18
  -5   3 -11    6.59    1.07
   3   5 -12    0.82    0.64
  -5   3 -12    0.89    0.64
  -5   3 -13    0.26    0.59
   3   5 -13    0.11    0.64
  -5   3 -14    2.49    1.05
  -5   3 -15   -0.97    0.72
  -2  -5   0    0.02    0.14
   2   5   0   -0.04    0.15
   5  -2   1  195.48    3.43
   2   5  -1  199.91    2.93
  -2  -5  -1  192.79    3.32
   2   5   1  201.96    3.39
   5  -2   2  463.47    6.67
  -5   2  -2  466.59    6.66
  -5   2   2  461.46    6.80
  -2  -5  -2  461.06    6.79
   2   5   2  473.19    6.86
   5  -2   3  859.08   11.21
  -5   2  -3  854.61   11.22
  -5   2   3  850.01   11.64
  -2  -5  -3  836.87   11.58
   2   5   3  837.50   11.62
  -5   2  -4  287.42    4.98
  -5   2   4  291.37    5.42
   2   5   4  288.15    5.45
   5  -2   4  272.51    4.85
  -2  -5  -4  279.48    5.34
  -5   2  -5  177.74    3.86
  -5   2   5  177.49    4.31
   2   5   5  187.57    4.48
   2   5   5  180.89    3.87
   5  -2   5  168.82    3.78
  -2  -5  -5  172.04    4.19
  -5   2  -6    0.81    0.33
   2   5   6    1.54    0.40
  -5   2   6    1.50    0.52
   2   5  -6    1.32    0.40
  -2  -5  -6    2.02    0.54
   2   5   6    1.04    0.47
   5  -2   6    1.84    0.50
  -5   2  -7  101.17    3.16
   2   5   7  103.32    3.57
   2   5  -7  108.56    3.10
   5  -2  -7  102.40    3.53
   2   5   7  111.60    3.40
  -2  -5  -7  106.93    3.60
   5  -2   7  104.83    3.25
  -5   2  -8    1.02    0.39
  -5   2  -8    0.95    0.49
   2   5   8    1.45    0.51
   5  -2  -8    2.31    0.74
   5  -2   8    1.93    0.58
   2   5  -8    1.49    0.46
  -5   2  -9  191.54    5.09
   5  -2   9  183.47    5.07
  -5   2  -9  196.29    5.21
   2   5  -9  199.12    5.00
  -5   2 -10    7.55    1.10
   2   5 -10    6.00    1.07
   5  -2  10    6.52    0.99
   2   5 -10    8.63    1.05
   2   5 -11   51.18    3.13
  -5   2 -11   51.30    2.81
  -5   2 -12   -0.09    0.51
   2   5 -12   -1.30    0.89
  -5   2 -13    7.03    1.27
   2   5 -13    7.20    1.43
  -5   2 -14    0.08    0.74
   2   5 -14    0.98    0.89
  -5   2 -15    4.18    1.14
   5  -1   0   68.99    1.81
  -1  -5   0   73.46    1.44
   1   5   0   75.09    1.46
   1   5  -1   43.29    0.86
  -1  -5   1   44.79    0.87
  -5   1  -1   45.92    1.41
   5  -1   1   45.26    1.39
  -5   1   1   44.92    1.26
   1   5   1   43.61    1.26
  -1  -5  -1   42.11    1.21
   5  -1   2  409.66    6.06
  -5   1  -2  401.10    6.02
  -5   1   2  411.40    6.09
  -1  -5  -2  399.57    6.03
   1   5   2  404.08    6.11
  -5   1  -3   70.49    2.00
   5  -1   3   73.45    2.03
   1   5   3   80.77    2.40
   5  -1  -3   71.50    2.11
  -5   1   3   71.78    2.15
  -1  -5  -3   73.74    2.16
  -5   1  -4   54.54    1.83
  -5   1   4   54.88    2.03
   1   5   4   55.94    2.04
   5  -1  -4   53.12    1.96
   5  -1   4   49.05    1.69
  -1  -5  -4   52.40    1.97
  -5   1  -5   49.51    1.91
   5  -1  -5   51.53    2.14
   1   5  -5   50.87    1.65
   1   5   5   48.71    2.11
   1   5   5   51.95    1.94
   5  -1   5   50.00    1.93
  -1  -5  -5   54.02    2.15
  -5   1  -6   35.60    1.71
   1   5  -6   36.78    1.54
   1   5   6   39.91    1.83
   5  -1  -6   38.37    1.95
  -1  -5  -6   36.23    1.92
   5  -1   6   36.44    1.74
  -5   1  -7    4.05    0.68
   1   5   7    3.78    0.67
   5  -1  -7    3.40    0.70
  -5   1  -7    3.24    0.58
  -1  -5  -7    4.01    0.74
   1   5  -7    3.61    0.56
   5  -1   7    4.50    0.70
  -5   1  -8    8.85    1.01
   1   5   8   10.58    1.13
   5  -1  -8    7.14    1.04
  -5   1  -8   10.01    1.03
  -1  -5  -8    8.36    1.09
   1   5  -8    7.79    0.84
   5  -1   8    9.46    1.08
  -5   1  -9    0.29    0.38
   5  -1  -9   -0.48    0.55
  -5   1  -9   -0.53    0.49
   5  -1   9   -0.56    0.54
   1   5  -9    0.18    0.34
   5  -1 -10    3.60    0.91
  -5   1 -10    2.44    0.65
   5  -1  10    2.82    0.74
   1   5 -10    2.23    0.54
   5  -1 -11    0.15    0.69
   1   5 -11   -0.52    0.62
  -5   1 -11    0.21    0.43
  -5   1 -12    4.55    1.05
   1   5 -12    4.70    1.14
   1   5 -13    0.32    0.72
  -5   1 -13    1.31    0.70
  -5   1 -14   -0.16    0.54
   1   5 -14    2.34    1.07
  -5   1 -15   -1.01    0.79
   0  -5   0    0.02    0.14
   5   0   0    0.13    0.25
  -5   0   0    0.13    0.12
   0   5   0    0.52    0.18
   5   0   1   58.13    1.64
  -5   0  -1   59.79    1.66
   5   0  -1   57.95    1.41
  -5   0   1   58.34    1.46
   0   5   1   56.58    1.45
   0  -5  -1   54.06    1.40
   5   0   2  204.07    3.71
  -5   0  -2  204.04    3.70
  -5   0   2  204.24    3.67
   0   5   2  199.27    3.68
   5   0  -2  201.71    3.62
   0  -5  -2  201.70    3.64
   5   0   3   48.49    1.67
  -5   0  -3   50.46    1.68
   5   0  -3   50.48    1.73
   0  -5  -3   50.53    1.74
   0   5  -3   48.06    1.10
  -5   0  -4  160.71    3.58
   5   0  -4  160.98    3.73
   0  -5  -4  168.50    3.81
   0   5  -4  159.06    2.84
   5   0   4  165.68    3.57
  -5   0  -5  104.54    2.93
   5   0  -5  100.94    3.06
   0   5   5  105.58    2.93
  -5   0  -5  105.70    2.57
   0   5  -5  101.68    2.39
   5   0   5  106.27    2.95
   0  -5  -5  102.98    3.10
  -5   0  -6    1.71    0.47
  -5   0  -6    2.10    0.46
   0   5   6    2.25    0.49
   5   0  -6    2.63    0.61
   0  -5  -6    2.29    0.58
   0   5  -6    2.14    0.41
   5   0   6    2.22    0.50
  -5   0  -7   95.31    3.15
   0   5   7   92.75    3.16
   5   0  -7   94.16    3.37
  -5   0  -7   89.50    2.81
   5   0   7   92.27    3.12
   0   5  -7   87.07    2.65
   0  -5  -7   97.91    3.41
  -5   0  -8   62.93    2.69
   0   5   8   63.81    2.77
   5   0   8   68.92    2.87
  -5   0  -8   64.65    2.55
   5   0  -8   67.35    3.00
   0  -5  -8   71.60    3.07
   0   5  -8   65.59    2.46
   5   0  -9   78.98    3.44
   5   0   9   75.22    3.20
  -5   0  -9   77.14    2.96
   0   5  -9   76.42    2.86
   5   0 -10   10.57    1.33
  -5   0 -10   13.35    1.34
   0   5 -10   10.50    1.09
   5   0  10   10.30    1.29
   5   0 -11   42.92    2.80
  -5   0 -11   41.70    2.46
   0   5 -11   38.63    2.68
  -5   0 -12    9.90    1.30
   5   0 -12   10.10    1.46
   0   5 -12   10.31    1.53
  -5   0 -13    2.57    0.83
   5   0 -13    2.33    0.98
   0   5 -13    2.15    1.09
   0   5 -14    6.50    1.39
   5   1   0    1.27    0.36
   5   1   0    1.74    0.21
   1  -5   0    1.02    0.19
   5   1   1   17.77    0.90
   5   1  -1   17.87    0.74
   1  -5  -1   17.21    0.77
  -5  -1  -1   17.59    0.88
   5   1   2   41.88    1.48
  -5  -1  -2   44.47    1.50
   1  -5  -2   42.09    1.45
   5   1  -2   43.91    1.44
  -5  -1  -3  117.92    2.79
   5   1   3  116.64    2.80
   1  -5  -3  123.01    2.95
   5   1  -3  115.83    2.83
  -5  -1  -3  111.64    1.97
  -1   5  -3  115.18    1.90
  -5  -1  -4   37.80    1.61
  -5  -1  -4   35.61    1.18
   5   1  -4   38.51    1.69
   1  -5  -4   40.07    1.78
  -1   5  -4   37.42    1.13
   5   1   4   37.86    1.61
  -5  -1  -5    3.97    0.60
  -1   5   5    3.73    0.59
  -5  -1  -5    3.05    0.41
   5   1  -5    3.08    0.57
  -1   5  -5    2.99    0.40
   5   1   5    3.32    0.57
   1  -5  -5    2.79    0.53
  -5  -1  -6   17.98    1.27
  -1   5   6   20.47    1.35
  -5  -1  -6   17.69    1.07
   5   1  -6   20.72    1.45
   5   1   6   20.08    1.36
  -1   5  -6   17.71    1.02
   1  -5  -6   18.27    1.36
  -5  -1  -7   -0.05    0.36
   5   1  -7   -0.95    0.61
  -5  -1  -7   -0.11    0.34
  -1   5   7   -0.08    0.34
   5   1   7    0.50    0.46
   1  -5  -7    0.09    0.43
  -1   5  -7   -0.12    0.26
  -5  -1  -8   15.03    1.32
   5   1   8   14.36    1.34
  -1   5   8   16.12    1.43
   5   1  -8   17.60    1.55
  -5  -1  -8   16.22    1.25
  -1   5  -8   14.24    1.10
   1  -5  -8   18.86    1.59
  -5  -1  -9    0.16    0.40
   5   1  -9    0.04    0.52
   5   1   9    0.74    0.53
  -1   5  -9    0.18    0.33
  -1   5 -10    4.74    0.77
  -5  -1 -10    5.90    0.96
   5   1 -10    5.85    1.07
   5   1  10    5.62    0.95
   5   1 -11    2.73    0.86
  -5  -1 -11    3.44    0.83
  -1   5 -11    3.48    0.93
   5   1 -12   -0.41    0.82
  -1   5 -12    0.11    0.63
  -5  -1 -12   -0.17    0.57
   5   1 -13    0.59    0.84
  -1   5 -13    0.68    0.80
  -1   5 -14   -0.97    0.79
   5   2   0    0.45    0.26
  -5  -2   0   -0.04    0.24
  -5  -2  -1  177.65    3.37
   5   2   1  181.51    3.41
  -2   5  -2  273.88    3.51
  -5  -2  -2  283.26    4.77
   5   2   2  283.45    4.76
   2  -5   2  268.80    3.50
  -5  -2  -3  841.10   11.51
   5   2   3  851.97   11.55
  -2   5  -3  833.00   10.11
   5   2   4    0.90    0.39
  -5  -2  -4    0.91    0.37
  -2   5  -4    1.30    0.25
   5   2  -4    0.77    0.32
   2  -5   4    1.57    0.29
   2  -5  -4    0.92    0.41
  -5  -2  -5  342.78    6.31
   2  -5  -5  347.57    6.64
  -5  -2  -5  326.66    5.35
  -2   5   5  349.91    6.36
   5   2  -5  353.90    6.63
   5   2   5  340.37    6.33
  -2   5  -5  334.25    5.31
  -5  -2  -6  121.04    3.51
   2  -5  -6  128.14    3.90
  -2   5   6  121.78    3.54
  -5  -2  -6  112.42    2.86
   5   2  -6  115.97    3.63
   5   2   6  122.63    3.54
  -2   5  -6  107.51    2.68
  -5  -2  -7  496.51    8.88
   5   2  -7  515.32    9.34
  -5  -2  -7  451.59    7.80
   2  -5  -7  521.26    9.40
  -2   5   7  503.21    8.95
   5   2   7  477.28    8.80
  -2   5  -7  469.50    7.75
  -2   5  -8    8.64    0.86
  -5  -2  -8    7.83    0.99
   5   2  -8    8.40    1.08
  -2   5   8    9.58    1.13
  -5  -2  -8    8.56    0.93
   5   2   8    9.01    1.11
   5   2   9  108.50    3.98
   5   2  -9  113.42    4.21
  -5  -2  -9  101.90    3.41
  -2   5  -9  102.97    3.32
  -2   5 -10   -0.11    0.36
   5   2 -10    0.86    0.69
   5   2  10   -0.51    0.57
   5   2 -11   61.97    3.44
  -2   5 -11   59.54    3.31
   5   2 -12    7.15    1.41
  -2   5 -12    5.83    1.17
   5   2 -13    6.05    1.26
  -2   5 -13    7.35    1.37
  -2   5 -14    0.37    0.64
  -5  -3   0  191.83    3.51
   5   3   0  195.96    3.54
   5   3  -1    0.96    0.27
   5   3   1    1.55    0.36
   3  -5   1    1.41    0.20
  -5  -3  -1    1.27    0.31
   5   3   2   18.64    1.02
  -5  -3  -2   17.89    0.99
   3  -5   2   17.58    0.61
  -5  -3  -3  121.09    2.98
  -3   5  -3  120.12    2.17
   5   3   3  119.55    2.16
   5   3   3  127.24    3.06
   3  -5   3  123.35    2.21
  -3   5  -4    3.70    0.38
  -5  -3  -4    3.99    0.58
   5   3   4    2.60    0.43
   5   3   4    4.20    0.43
   3  -5   4    4.17    0.41
  -5  -3  -5    2.48    0.50
  -3   5  -5    1.51    0.30
  -3   5   5    1.69    0.44
   5   3   5    2.35    0.60
   3  -5   5    1.88    0.34
  -3   5  -6   26.38    1.25
  -5  -3  -6   25.46    1.57
   3  -5   6   27.32    1.32
  -3   5   6   27.26    1.64
   3  -5  -6   30.48    1.83
   5   3  -6   26.19    1.68
   5   3   6   25.38    1.60
  -3   5  -7   67.54    2.29
  -5  -3  -7   74.43    2.90
   3  -5  -7   77.54    3.15
   5   3  -7   75.82    3.11
  -3   5   7   74.94    2.93
   5   3   7   72.84    2.90
  -5  -3  -8   42.82    2.31
   5   3   8   39.13    2.27
  -3   5   8   42.52    2.35
   5   3  -8   42.11    2.44
  -3   5  -8   40.41    1.88
  -3   5  -9   -0.35    0.42
   5   3  -9   -0.41    0.51
   5   3   9    0.11    0.48
  -3   5 -10    0.81    0.46
   5   3 -10    0.62    0.60
   5   3  10   -0.11    0.54
   5   3 -11   -0.43    0.55
  -3   5 -11    0.22    0.53
   5   3 -12    0.84    0.67
  -3   5 -12    1.21    0.76
  -3   5 -13    0.17    0.78
   5   3 -13   -0.92    0.81
  -3   5 -14    3.03    1.13
   5   4   0    0.28    0.26
  -5  -4   0    0.24    0.21
  -5  -4  -1   14.15    0.84
   4  -5   1   12.41    0.62
   5   4  -1   14.85    0.83
   5   4   1   14.75    0.85
   5   4   2   53.74    1.80
   4  -5   2   49.57    1.28
  -5  -4  -2   53.19    1.79
  -4   5  -3  192.04    3.23
   4  -5   3  199.12    3.27
  -5  -4  -3  194.57    4.08
   5   4   3  195.21    4.06
  -4   5  -4  106.44    2.35
  -5  -4  -4  108.95    3.06
   5   4   4  109.98    2.38
   4  -5   4  110.52    2.39
   5   4   4  112.19    3.10
  -5  -4  -5  130.06    3.58
  -4   5  -5  124.42    2.78
  -4   5   5  127.24    3.55
   5   4   5  125.62    2.88
   5   4   5  122.90    3.51
   4  -5   5  124.13    2.84
  -5  -4  -6   94.95    3.18
  -4   5  -6   87.89    2.47
  -4   5   6   96.55    3.20
   4  -5   6   88.62    2.55
   5   4   6   90.54    3.14
  -4   5  -7    6.35    0.70
  -5  -4  -7    6.96    0.89
  -4   5   7    7.27    0.96
   5   4   7    8.37    1.05
   4  -5   7    7.36    0.79
   4  -5  -7    5.29    0.86
  -4   5  -8   69.62    2.54
   4  -5   8   74.72    2.69
   5   4  -8   75.66    3.33
   5   4   8   78.90    3.30
  -4   5  -9   17.36    1.34
   5   4   9   19.15    1.71
   5   4  -9   22.16    1.91
  -4   5 -10   17.94    1.46
   5   4  10   19.99    1.88
   5   4 -10   22.11    2.00
  -4   5 -11    7.47    1.21
   5   4 -11    6.29    1.18
  -4   5 -12    2.61    0.84
   5   4 -12    2.88    1.00
  -4   5 -13    6.35    1.33
   5   4 -13    5.44    1.23
  -4   5 -14    3.69    1.09
  -5  -5   0   26.50    1.13
   5   5   0   26.66    1.15
  -5  -5  -1    0.95    0.32
   5   5  -1    0.89    0.28
   5  -5   1    0.62    0.22
   5   5   1    1.09    0.34
   5   5  -2    1.27    0.29
   5  -5   2    0.74    0.23
  -5  -5  -2    0.69    0.30
   5   5   2    1.51    0.40
  -5   5  -3  136.55    2.70
  -5  -5  -3  129.30    3.26
   5  -5   3  130.47    2.65
   5   5   3  135.44    3.32
  -5  -5  -4   73.94    2.51
  -5   5  -4   71.93    1.94
   5   5   4   70.66    1.90
   5   5   4   72.57    2.48
   5  -5   4   71.35    1.92
  -5   5  -5    9.75    0.74
  -5  -5  -5   10.03    1.00
  -5   5   5   10.88    1.02
   5   5   5    9.84    0.75
   5   5   5   11.18    1.03
   5  -5   5   10.71    0.81
  -5  -5  -6  142.50    4.06
  -5   5  -6  135.55    3.27
   5   5   6  138.50    3.39
  -5   5   6  143.56    4.09
   5  -5   6  139.84    3.38
   5   5   6  141.66    4.11
  -5  -5  -7   -0.39    0.36
  -5   5  -7    0.33    0.31
   5   5   7   -0.32    0.41
  -5   5   7    0.25    0.39
   5   5   7   -0.46    0.49
   5  -5   7    0.41    0.39
  -5   5  -8   22.17    1.44
   5  -5   8   24.78    1.55
   5   5   8   23.44    1.86
  -5   5  -9    9.45    1.01
   5   5  -9   11.53    1.45
   5   5   9    9.00    1.23
   5  -5   9    9.52    1.06
  -5   5 -10   42.37    2.25
   5   5  10   44.90    2.78
   5   5 -10   47.28    2.95
  -5   5 -11    1.15    0.62
   5   5 -11    0.68    0.63
  -5   5 -12    5.02    1.07
   5   5 -12    4.62    1.22
   5   5 -13    1.69    0.91
  -5   5 -13    0.38    0.57
  -5   5 -14    1.98    0.93
  -5  -6   0    0.23    0.22
   5   6   0   -0.09    0.22
  -5  -6  -1  303.04    5.21
   5   6  -1  311.13    4.99
   6  -5   1  305.32    4.93
   5   6   1  311.10    5.25
  -5  -6  -2    0.35    0.30
   6  -5   2    0.37    0.23
   5   6  -2   -0.01    0.19
   5   6   2    0.52    0.30
  -6   5  -3  249.16    4.30
  -5  -6  -3  240.20    4.90
   6  -5   3  246.35    4.27
   5   6   3  253.60    4.99
   6  -5   4   76.52    2.14
  -5  -6  -4   74.60    2.59
  -6   5  -4   77.30    2.14
  -6   5   4   78.73    2.66
   5   6   4   80.17    2.67
  -5  -6  -5  722.65   11.32
  -6   5  -5  712.36   10.21
  -6   5   5  740.33   11.42
   5   6   5  715.78   10.16
   6  -5   5  713.01   10.23
   5   6   5  714.03   11.33
  -5  -6  -6   14.23    1.25
  -6   5  -6   13.07    0.98
   5   6   6   13.19    0.98
  -6   5   6   14.76    1.26
   5   6   6   13.71    1.28
   6  -5   6   14.06    1.02
  -5  -6  -7  174.45    4.88
  -6   5  -7  163.11    4.00
  -6   5   7  169.07    4.85
   5   6   7  170.12    4.15
   5   6   7  159.78    4.76
   6  -5   7  163.15    4.06
  -6   5  -8    1.94    0.48
   5   6   8    2.27    0.54
   6  -5   8    1.51    0.51
   5   6   8    2.31    0.78
  -6   5  -9   64.69    2.69
   5   6  -9   70.69    2.93
   5   6   9   68.44    3.34
   6  -5   9   66.40    2.80
   5   6 -10   -0.53    0.62
   5   6  10    0.37    0.65
   6  -5  10    0.38    0.54
   5   6 -11   52.84    3.31
  -6   5 -11   51.99    2.94
   5   6 -12    2.71    0.98
  -6   5 -12    2.14    0.84
  -6   5 -13    4.07    0.96
   5   6 -13    6.12    1.41
  -6   5 -14    2.31    1.05
  -6   5 -15    6.64    1.47
  -4  -6   0  118.04    2.49
   4   6   0  116.28    2.49
   6  -4   1   66.57    1.82
   4   6   1   64.83    1.87
   4   6  -1   62.53    1.66
  -4  -6  -1   64.18    1.86
   4   6  -2   51.08    1.47
   6  -4   2   55.07    1.66
  -4  -6  -2   55.93    1.84
   4   6   2   55.88    1.86
  -6   4  -3  695.99    9.62
   6  -4   3  704.27    9.62
  -4  -6  -3  699.01   10.25
   4   6   3  713.44   10.32
   6  -4   4    0.35    0.28
  -4  -6  -4    1.26    0.44
  -6   4  -4    0.98    0.30
  -6   4   4    1.35    0.42
   4   6   4    1.47    0.48
  -4  -6  -5    0.59    0.41
   6  -4   5    0.17    0.30
  -6   4  -5    0.05    0.26
   4   6   5    0.55    0.30
  -6   4   5    0.45    0.38
   4   6   5    0.49    0.42
  -4  -6  -6    4.55    0.74
  -6   4  -6    4.22    0.60
   4   6   6    4.92    0.63
  -6   4   6    4.78    0.76
   4   6   6    5.21    0.82
   6  -4   6    4.73    0.64
  -6   4  -7   14.20    1.12
  -6   4   7   18.16    1.52
   4   6   7   16.60    1.23
  -4  -6  -7   16.05    1.36
   4   6   7   16.59    1.49
   6  -4   7   18.48    1.30
  -6   4  -8    1.98    0.54
   4   6   8    1.51    0.49
   4   6   8    1.88    0.58
   6  -4   8    1.30    0.49
  -6   4  -9  210.29    5.28
   6  -4   9  214.02    5.45
   4   6  -9  213.42    5.33
   4   6   9  217.63    6.16
  -6   4 -10   14.61    1.48
   4   6 -10   15.80    1.77
   6  -4  10   16.71    1.50
   4   6 -10   18.78    1.58
  -6   4 -11    0.37    0.54
   4   6 -11    1.71    0.89
  -6   4 -12    1.33    0.74
   4   6 -12    1.97    1.00
  -6   4 -13   13.80    1.74
   4   6 -13   13.97    1.93
  -6   4 -14    1.59    0.84
  -6   4 -15   14.67    1.92
  -3  -6   0    0.37    0.21
   3   6   0    0.31    0.20
  -3  -6   1  117.03    2.21
   6  -3   1  117.31    2.59
  -3  -6  -1  114.67    2.48
   3   6  -1  111.83    2.18
   3   6   1  110.02    2.42
   3   6  -2  197.77    3.18
  -6   3  -2  196.67    3.69
  -3  -6  -2  197.12    3.82
   6  -3   2  203.00    3.72
   3   6   2  201.39    3.88
  -3  -6  -3  791.26   11.16
   6  -3   3  772.92   10.65
  -6   3  -3  785.61   10.68
  -6   3   3  805.40   11.19
   3   6   3  792.43   11.19
  -6   3  -4  117.76    2.87
   6  -3   4  117.75    2.86
  -6   3   4  117.50    3.22
   3   6   4  113.11    3.16
  -3  -6  -4  114.78    3.14
  -6   3  -5   17.87    1.09
   3   6   5   18.45    1.11
  -6   3   5   18.91    1.33
  -3  -6  -5   18.50    1.28
   6  -3   5   18.90    1.15
   3   6   5   18.97    1.35
  -6   3  -6   34.40    1.66
   3   6   6   43.84    2.32
   3   6   6   39.33    1.78
  -6   3   6   39.24    2.06
   6  -3   6   36.73    1.74
  -3  -6  -6   39.40    2.03
  -3  -6  -7    8.93    1.07
  -6   3  -7    8.80    0.91
   3   6   7    8.73    0.92
  -6   3   7    8.63    1.02
   6  -3   7    8.11    0.88
   3   6   7    7.06    0.95
   3   6  -7    7.36    0.79
  -6   3  -8   35.88    1.92
   3   6  -8   36.24    1.86
   3   6   8   38.81    2.07
   3   6   8   34.88    2.23
   6  -3   8   37.04    2.02
  -6   3  -9   17.84    1.45
   3   6  -9   20.13    1.50
   6  -3   9   21.89    1.69
  -6   3  -9   18.58    1.52
   6  -3  10   27.44    1.97
  -6   3 -10   30.30    2.05
   3   6 -10   27.03    1.83
   3   6 -11    1.11    0.71
  -6   3 -11    2.26    0.71
   3   6 -12    2.64    0.82
  -6   3 -12    3.14    0.87
   3   6 -13    1.19    0.97
  -6   3 -13    0.81    0.66
  -6   3 -14    3.38    1.00
  -6   3 -15   -0.66    0.60
  -2  -6   0  533.63    7.05
   2   6   0  545.16    7.07
   6  -2   1  180.85    3.45
  -2  -6   1  182.89    2.79
  -2  -6  -1  181.72    3.24
   2   6  -1  182.09    2.78
   2   6   1  183.12    3.28
   6  -2   2 2532.87   30.25
  -6   2  -2 2550.65   30.26
   2   6  -2 2552.78   29.09
  -6   2   2 2541.58   30.27
  -2  -6  -2 2546.53   30.30
   2   6   2 2586.72   30.32
   6  -2   3  987.39   13.00
  -6   2  -3  987.92   13.02
  -6   2   3  991.08   13.32
  -2  -6  -3  977.27   13.27
   2   6   3  991.44   13.35
  -6   2  -4 1815.70   22.57
   6  -2   4 1797.39   22.54
  -6   2   4 1837.53   23.13
  -2  -6  -4 1817.17   23.06
   2   6   4 1812.01   23.12
  -6   2  -5   51.40    1.95
   2   6   5   50.89    1.93
   2   6   5   50.84    2.20
  -6   2   5   52.48    2.22
  -2  -6  -5   50.36    2.15
   6  -2   5   50.07    1.92
  -6   2  -6  245.68    5.13
   2   6   6  234.69    5.56
   2   6  -6  243.18    4.66
  -6   2   6  258.87    5.80
   2   6   6  252.40    5.20
   6  -2   6  247.05    5.18
  -2  -6  -6  252.74    5.66
  -6   2  -7   57.45    2.35
   2   6   7   58.29    2.67
   2   6  -7   58.51    2.18
   2   6   7   56.94    2.37
  -2  -6  -7   55.68    2.60
   6  -2   7   55.08    2.34
  -6   2  -8  284.43    6.21
   2   6   8  278.51    6.31
  -6   2  -8  291.30    6.14
   2   6  -8  287.42    5.85
   6  -2   8  276.16    6.23
  -6   2  -9   31.36    1.95
   6  -2   9   35.79    2.28
  -6   2  -9   30.05    1.91
   2   6   9   30.54    2.00
   2   6  -9   33.18    1.86
  -6   2 -10  209.16    5.58
   6  -2  10  198.26    5.60
   2   6 -10  201.05    5.24
  -6   2 -11    7.72    1.12
   2   6 -11    9.59    1.42
  -6   2 -12   34.22    2.40
   2   6 -12   37.64    2.86
   2   6 -13    2.11    0.96
  -6   2 -13    1.48    0.83
  -6   2 -14    5.33    1.16
  -6   2 -15    0.69    0.61
   6  -1   0   -0.41    0.29
  -1  -6   0    0.04    0.13
   1   6   0    0.38    0.19
  -1  -6   1  692.12    8.24
   6  -1   1  704.01    9.51
  -6   1  -1  710.79    9.54
  -6   1   1  693.37    9.07
  -1  -6  -1  661.06    8.91
   1   6  -1  704.07    8.27
   6  -1   2   40.47    1.47
   1   6  -2   39.07    0.79
  -6   1  -2   40.42    1.47
  -6   1   2   39.63    1.43
   1   6   2   40.49    1.45
  -1  -6  -2   39.04    1.41
   6  -1   3  143.99    3.19
  -6   1  -3  142.04    3.17
   1   6   3  144.83    3.35
  -6   1   3  140.61    3.29
  -1  -6  -3  140.23    3.23
  -6   1  -4   81.04    2.40
   6  -1   4   80.58    2.39
  -6   1   4   78.91    2.53
   1   6  -4   78.21    1.78
   6  -1  -4   81.32    2.54
   1   6   4   76.76    2.49
  -1  -6  -4   78.85    2.51
  -6   1  -5  332.77    6.07
   1   6   5  334.02    6.45
   6  -1  -5  329.14    6.37
   1   6  -5  337.59    5.32
   1   6   5  328.54    6.04
  -1  -6  -5  342.58    6.50
   6  -1   5  335.23    6.11
  -6   1  -6   32.87    1.69
   1   6   6   32.86    1.70
   6  -1  -6   30.24    1.76
   6  -1   6   32.66    1.71
  -1  -6  -6   34.43    1.88
   1   6  -6   31.25    1.37
  -6   1  -7   91.31    3.09
   6  -1  -7   91.10    3.36
   1   6   7   94.10    3.17
  -6   1  -7   92.56    2.88
   1   6  -7   88.87    2.65
   6  -1   7   91.23    3.11
  -1  -6  -7   95.82    3.44
  -6   1  -8   13.67    1.24
   6  -1  -8   15.59    1.46
   1   6   8   15.98    1.37
  -6   1  -8   15.83    1.26
   6  -1   8   14.07    1.30
   1   6  -8   16.64    1.19
   6  -1  -9    7.47    1.14
  -6   1  -9    8.25    0.99
   6  -1   9    9.21    1.19
   1   6  -9    8.14    0.91
  -6   1 -10    0.59    0.47
   6  -1 -10    0.16    0.54
   1   6 -10    0.41    0.46
   6  -1  10   -0.72    0.55
   6  -1  11   23.68    1.98
  -6   1 -11   28.47    2.03
   6  -1 -11   25.30    2.20
   1   6 -11   25.05    2.20
  -6   1 -12   10.87    1.34
   1   6 -12   12.58    1.72
   1   6 -13   18.29    2.08
  -6   1 -13   13.35    1.57
  -6   1 -14    4.30    1.07
   1   6 -14    4.20    1.34
   6   0   0  262.18    4.54
  -6   0   0  264.85    3.72
   0   6   0  263.60    3.74
   0  -6   0  264.89    3.69
  -6   0  -1  125.25    2.79
   6   0   1  125.52    2.80
   0   6   1  125.65    2.49
  -6   0   1  126.07    2.47
   0  -6  -1  132.68    2.49
  -6   0  -2    2.88    0.43
   6   0   2    3.43    0.49
   6   0  -2    3.60    0.44
  -6   0   2    2.90    0.41
   0  -6  -2    3.71    0.44
   6   0   3    5.42    0.62
  -6   0  -3    5.31    0.59
   6   0  -3    5.77    0.64
   0   6  -3    5.24    0.29
   0  -6  -3    4.28    0.53
  -6   0  -4   41.62    1.69
   6   0  -4   38.22    1.70
   0  -6  -4   38.55    1.72
   0   6  -4   38.35    1.10
   6   0   4   41.23    1.70
  -6   0  -5   36.38    1.69
   6   0  -5   33.78    1.75
  -6   0  -5   35.61    1.36
   0   6   5   35.06    1.66
   6   0   5   34.15    1.67
   0   6  -5   33.11    1.20
   0  -6  -5   35.56    1.80
  -6   0  -6    6.33    0.79
  -6   0  -6    6.56    0.67
   6   0  -6    5.83    0.86
   0   6   6    7.25    0.83
   0   6  -6    6.40    0.60
   6   0   6    6.64    0.84
   0  -6  -6    5.52    0.77
  -6   0  -7  156.99    4.24
   0   6   7  161.07    4.33
  -6   0  -7  153.66    3.76
   6   0  -7  155.69    4.53
   6   0   7  151.57    4.20
   0  -6  -7  159.96    4.56
   0   6  -7  152.02    3.56
  -6   0  -8    9.31    1.05
   0   6   8    8.51    1.03
  -6   0  -8    8.95    0.92
   6   0  -8    7.38    1.05
   6   0   8    8.84    1.07
   0   6  -8    7.52    0.81
   6   0  -9  100.52    3.94
  -6   0  -9   93.95    3.28
   6   0   9   96.15    3.71
   0   6  -9   88.84    3.04
   6   0 -10   54.85    3.07
  -6   0 -10   53.72    2.60
   6   0  10   49.88    2.76
   0   6 -10   51.13    2.41
   6   0 -11    7.93    1.35
  -6   0 -11    5.41    0.93
   6   0  11    5.85    1.04
   6   0 -12   -0.31    0.60
  -6   0 -12   -0.01    0.45
   0   6 -12   -0.05    0.65
   6   0 -13   29.27    2.60
   0   6 -13   29.87    2.66
  -6   0 -13   26.98    2.23
   0   6 -14    3.47    1.02
   6   1   0    0.10    0.28
   6   1   0   -0.04    0.13
   1  -6   0    0.13    0.14
   6   1   1  131.43    2.89
  -6  -1  -1  129.77    2.87
   1  -6  -1  131.35    2.60
   6   1  -1  127.76    2.43
   6   1   2    0.93    0.36
  -6  -1  -2    0.69    0.32
   6   1  -2    1.20    0.32
   1  -6  -2    0.81    0.29
  -1   6  -3  441.72    5.47
  -6  -1  -3  457.90    7.20
   6   1   3  472.53    7.22
  -6  -1  -3  445.93    5.64
   6   1  -3  444.81    7.05
   1  -6  -3  465.32    7.25
  -6  -1  -4  104.01    2.88
   6   1  -4  101.09    2.88
  -6  -1  -4  101.30    2.06
  -1   6  -4   93.63    1.82
   6   1   4  111.15    2.95
   1  -6  -4  105.87    2.99
  -6  -1  -5  246.95    5.07
  -1   6   5  233.61    4.96
  -6  -1  -5  228.93    4.07
   6   1  -5  231.50    5.11
   6   1   5  245.13    5.06
  -1   6  -5  231.39    3.91
   1  -6  -5  237.84    5.22
  -6  -1  -6  186.54    4.51
  -6  -1  -6  170.94    3.67
  -1   6   6  183.11    4.47
   6   1  -6  184.09    4.69
   6   1   6  180.77    4.47
  -1   6  -6  172.09    3.54
   1  -6  -6  189.10    4.81
  -6  -1  -7   45.31    2.20
  -1   6   7   46.27    2.23
   6   1  -7   45.60    2.34
  -6  -1  -7   42.49    1.80
  -1   6  -7   45.97    1.77
   6   1   7   43.57    2.18
   1  -6  -7   48.48    2.42
  -6  -1  -8    9.28    1.06
  -1   6   8   10.40    1.16
  -6  -1  -8    8.74    0.88
   6   1  -8    9.67    1.17
   6   1   8    9.18    1.13
  -1   6  -8    8.64    0.87
   6   1   9   68.03    3.14
   6   1  -9   74.90    3.40
  -6  -1  -9   69.88    2.74
  -1   6  -9   65.96    2.56
  -1   6 -10    9.56    1.03
  -6  -1 -10   10.66    1.15
   6   1 -10   10.87    1.46
   6   1  10    9.89    1.31
  -6  -1 -11    0.09    0.45
   6   1 -11    1.40    0.77
   6   1  11   -0.52    0.72
   6   1 -12    6.34    1.27
  -1   6 -12    7.38    1.39
   6   1 -13   11.15    1.69
  -1   6 -13   12.05    1.76
  -1   6 -14    3.19    1.20
   6   2   0  339.13    5.49
   6   2   1   61.93    1.89
  -6  -2  -1   62.18    1.89
   6   2  -1   65.67    1.91
   6   2   2  488.85    7.49
   6   2  -2  492.44    7.24
  -6  -2  -2  498.87    7.52
  -6  -2  -3  387.35    6.48
   6   2   3  373.21    6.39
  -2   6  -3  367.84    4.87
   2  -6  -3  373.18    6.43
   6   2  -3  372.60    6.37
  -6  -2  -4 1517.28   19.42
  -2   6  -4 1472.58   17.60
   6   2  -4 1527.23   19.58
   2  -6  -4 1541.51   19.64
   6   2   4 1436.62   19.27
  -2   6  -5   38.68    1.29
  -6  -2  -5   40.48    1.87
   2  -6  -5   40.02    1.97
   6   2  -5   38.11    1.90
  -2   6   5   41.96    1.90
   6   2   5   42.60    1.94
  -6  -2  -6  878.78   13.20
  -2   6   6  895.33   13.25
   2  -6  -6  946.01   13.94
   6   2  -6  853.91   13.47
   6   2   6  868.48   13.20
  -2   6  -6  848.17   11.68
  -2   6  -7    0.21    0.26
  -6  -2  -7    0.73    0.44
  -2   6   7   -0.33    0.35
  -6  -2  -7    0.22    0.29
   6   2  -7    0.91    0.51
   2  -6  -7   -0.10    0.51
   6   2   7   -0.44    0.49
  -6  -2  -8  290.08    6.59
  -6  -2  -8  276.84    5.67
   6   2  -8  290.07    6.90
  -2   6   8  295.84    6.73
   6   2   8  275.79    6.54
  -2   6  -8  269.39    5.39
  -2   6  -9    6.09    0.77
   6   2  -9    7.29    1.14
   6   2   9    7.98    1.09
   6   2  10  145.08    4.94
   6   2 -10  153.49    5.27
  -2   6 -10  132.01    3.95
   6   2 -11    1.66    0.69
   6   2  11    1.16    0.68
   6   2 -12   63.60    3.73
  -2   6 -12   61.34    3.57
   6   2 -13    1.87    1.01
  -2   6 -13    1.26    0.96
  -2   6 -14   19.79    2.24
  -6  -3   0    0.01    0.25
   6   3   0    0.07    0.25
  -6  -3  -1  135.85    3.03
   6   3  -1  140.31    3.03
   6   3   1  134.50    3.06
  -6  -3  -2    2.38    0.44
   6   3   2    2.57    0.50
   3  -6   2    2.14    0.22
   6   3   3   18.67    1.15
  -6  -3  -3   18.54    1.13
  -3   6  -3   17.25    0.64
   6   3   3   18.76    0.66
   3  -6   3   16.59    0.64
  -3   6  -4   60.26    1.48
  -6  -3  -4   60.30    2.20
   6   3   4   59.47    2.17
   3  -6   4   57.98    1.50
  -6  -3  -5  391.05    7.16
  -3   6  -5  379.56    5.79
   3  -6  -5  390.73    7.41
  -3   6   5  392.28    7.16
   3  -6   5  395.38    5.99
   6   3   5  393.91    7.18
  -3   6  -6  328.77    5.54
  -6  -3  -6  337.27    6.79
   3  -6   6  334.09    5.69
  -3   6   6  349.60    6.88
   3  -6  -6  353.12    7.16
   6   3  -6  343.79    7.07
   6   3   6  341.79    6.85
  -3   6  -7  122.68    3.14
  -6  -3  -7  131.81    4.02
   3  -6  -7  149.01    4.56
  -3   6   7  130.47    4.05
   6   3  -7  132.88    4.26
   6   3   7  128.78    4.02
  -3   6  -8   19.19    1.25
   6   3  -8   21.98    1.78
   6   3   8   20.10    1.67
  -3   6  -9    0.09    0.32
   6   3  -9   -0.41    0.59
   6   3   9   -0.85    0.62
  -3   6 -10    0.25    0.42
   6   3 -10    2.14    0.86
   6   3  10    1.82    0.75
   6   3 -11    9.02    1.37
   6   3  11    7.44    1.22
   6   3 -12   17.69    2.06
  -3   6 -12   20.19    2.04
   6   3 -13   31.35    2.74
  -3   6 -13   26.15    2.41
  -3   6 -14    1.64    0.90
  -6  -4   0    6.63    0.61
   6   4   0    6.30    0.62
   6   4   1  186.31    3.77
  -6  -4  -1  182.17    3.70
   6   4  -1  186.66    3.67
   6   4   2    7.27    0.73
   4  -6   2    6.14    0.42
  -6  -4  -2    7.46    0.70
   4  -6   3    0.41    0.18
   6   4   3    0.13    0.31
  -4   6  -3    0.14    0.17
  -6  -4  -3    0.17    0.27
   6   4   3    0.61    0.20
  -6  -4  -4   30.39    1.58
  -4   6  -4   31.01    1.09
   6   4   4   29.93    1.08
   6   4   4   29.85    1.58
   4  -6   4   29.84    1.09
  -6  -4  -5  394.62    7.40
  -4   6  -5  389.86    6.05
  -4   6   5  413.26    7.45
   6   4   5  401.99    6.21
   6   4   5  408.83    7.44
   4  -6   5  408.60    6.19
  -6  -4  -6   18.84    1.41
  -4   6  -6   17.36    1.00
  -4   6   6   20.96    1.49
   4  -6   6   20.17    1.15
   6   4   6   18.42    1.44
  -6  -4  -7  189.56    5.04
  -4   6  -7  179.46    4.03
   4  -6  -7  200.99    5.45
   4  -6   7  187.64    4.19
  -4   6   7  191.14    5.10
   6   4  -7  198.31    5.37
   6   4   7  190.94    5.09
  -4   6  -8   -0.01    0.28
   6   4  -8   -0.39    0.61
   6   4   8   -0.24    0.57
  -4   6  -9   35.85    1.88
   6   4   9   45.74    2.71
   6   4  -9   39.74    2.57
  -4   6 -10   28.30    1.79
   6   4 -10   31.15    2.43
   6   4  10   28.11    2.24
   6   4 -11   18.51    1.95
   6   4  11   17.18    1.82
   6   4 -12    2.05    0.84
  -4   6 -12    1.98    0.86
   6   4 -13    4.61    1.19
  -4   6 -13    1.42    0.74
  -4   6 -14    0.90    0.76
   6   5   0    0.17    0.26
  -6  -5   0    0.10    0.22
   5  -6   1  109.47    2.27
  -6  -5  -1  108.57    2.72
   6   5  -1  106.90    2.60
   6   5   1  104.90    2.69
   6   5  -2    9.53    0.75
   5  -6   2    9.87    0.59
   6   5   2   10.66    0.84
  -6  -5  -2    9.97    0.83
  -5   6  -3  177.95    3.19
   5  -6   3  179.16    3.18
  -6  -5  -3  181.78    4.10
   6   5   3  182.20    4.13
  -6  -5  -4    1.78    0.47
   5  -6   4    1.12    0.27
   6   5   4    1.15    0.41
  -5   6  -4    1.69    0.32
   6   5   4    1.82    0.31
  -6  -5  -5  732.31   11.33
  -5   6  -5  689.92    9.76
  -5   6   5  738.89   11.33
   6   5   5  705.46    9.79
   5  -6   5  711.65    9.87
   6   5   5  707.15   11.25
  -6  -5  -6    1.03    0.47
  -5   6  -6    1.47    0.37
  -5   6   6    1.95    0.58
   6   5   6    1.03    0.28
   6   5   6    1.45    0.57
   5  -6   6    2.06    0.44
  -6  -5  -7   88.06    3.33
  -5   6  -7   81.81    2.56
  -5   6   7   86.22    3.31
   5  -6   7   83.45    2.67
   6   5   7   85.26    3.32
  -5   6  -8   14.09    1.12
   5  -6   8   13.05    1.13
   6   5   8   12.25    1.32
  -5   6  -9  106.70    3.40
   6   5   9  112.75    4.48
   6   5  -9  117.39    4.51
  -5   6 -10    4.19    0.78
   6   5 -10    4.45    0.97
   6   5  10    6.01    1.12
   6   5 -11   19.97    2.05
   6   5  11   17.92    1.91
  -5   6 -12    0.82    0.57
   6   5 -12    1.88    0.83
   6   5 -13    5.89    1.36
  -5   6 -13    6.78    1.26
  -5   6 -14    0.81    0.83
  -6  -6   0  731.56   10.26
   6   6   0  748.35   10.37
   6   6  -1   -0.23    0.33
  -6  -6  -1    0.51    0.29
   6  -6   1   -0.08    0.23
   6   6   1    0.45    0.33
   6   6  -2  202.34    3.91
   6  -6   2  199.36    3.59
  -6  -6  -2  198.91    4.26
   6   6   2  206.26    4.29
   6   6   3    2.66    0.52
   6  -6   3    3.55    0.43
  -6  -6  -3    3.01    0.52
  -6   6  -4 1268.14   16.12
   6  -6   4 1268.70   16.13
  -6  -6  -4 1300.77   17.61
   6   6   4 1299.83   17.62
  -6  -6  -5   23.65    1.52
  -6   6  -5   22.57    1.15
   6   6   5   23.78    1.16
  -6   6   5   22.38    1.51
   6   6   5   23.80    1.56
   6  -6   5   23.43    1.18
  -6   6  -6  770.26   11.13
  -6  -6  -6  796.40   12.66
  -6   6   6  816.21   12.79
   6   6   6  781.55   11.19
   6  -6   6  783.61   11.26
   6   6   6  784.36   12.67
  -6   6  -7    6.33    0.73
   6   6   7    7.87    0.81
   6   6   7    6.15    0.93
   6  -6   7    6.11    0.74
  -6   6  -8   98.56    3.10
   6  -6   8  104.69    3.36
   6   6   8   99.52    3.89
  -6   6  -9   26.47    1.66
   6  -6   9   26.46    1.73
   6   6   9   31.57    2.37
  -6   6 -10  128.14    4.03
   6   6  10  135.25    5.04
   6   6 -10  146.92    5.39
   6   6 -11    9.31    1.47
   6   6  11   12.09    1.59
  -6   6 -12   39.86    2.80
   6   6 -12   41.93    3.12
  -6   6 -13    0.73    0.73
   6   6 -13    0.58    0.82
  -6   6 -14    4.43    1.24
  -6  -7   0    0.46    0.28
   6   7   0    0.52    0.32
   7  -6   1  125.08    2.85
  -6  -7  -1  124.88    3.07
   6   7  -1  121.89    2.90
   6   7   1  126.33    3.11
   7  -6   2   24.41    1.13
   6   7  -2   24.25    1.16
  -6  -7  -2   25.45    1.37
   6   7   2   23.61    1.34
   7  -6   3    4.42    0.50
   6   7  -3    2.96    0.43
  -6  -7  -3    3.58    0.60
   6   7   3    3.93    0.64
  -7   6  -4   13.92    0.90
   7  -6   4   13.81    0.90
  -6  -7  -4   15.60    1.21
   6   7   4   13.29    1.13
  -6  -7  -5  167.74    4.46
  -7   6  -5  166.03    3.63
  -7   6   5  173.18    4.50
   6   7   5  161.97    3.54
   7  -6   5  149.80    3.39
   6   7   5  169.45    4.50
  -6  -7  -6   32.61    1.94
  -7   6  -6   29.75    1.47
  -7   6   6   33.17    2.00
   6   7   6   30.83    1.51
   7  -6   6   34.11    1.60
   6   7   6   34.04    2.04
  -7   6  -7   -0.21    0.33
   6   7   7    0.21    0.29
   6   7   7    0.78    0.53
   7  -6   7    0.43    0.33
  -7   6  -8   24.11    1.51
   6   7   8   25.23    1.60
   6   7   8   25.33    1.95
   7  -6   8   23.87    1.54
  -7   6  -9   -0.21    0.33
   7  -6   9    0.35    0.50
   6   7   9    1.12    0.67
   6   7 -10    5.30    1.09
   6   7  10    5.80    1.18
   7  -6  10    5.69    0.95
   6   7 -11    2.62    1.00
   6   7  11    2.03    0.91
   6   7 -12    2.75    0.88
  -7   6 -12   -0.11    0.60
  -7   6 -13    0.89    0.77
  -7   6 -14    7.29    1.41
  -5  -7   0   72.04    1.99
   5   7   0   68.83    1.99
   7  -5   1   18.02    0.99
   5   7  -1   16.32    0.88
  -5  -7  -1   16.88    0.99
   5   7   1   16.72    1.01
  -5  -7  -2    5.15    0.60
   5   7  -2    5.12    0.50
   7  -5   2    5.06    0.55
   5   7   2    5.08    0.59
  -7   5  -3    0.14    0.26
   5   7  -3    0.27    0.22
  -5  -7  -3    0.06    0.26
   7  -5   3    0.33    0.28
   5   7   3    0.80    0.40
  -5  -7  -4   30.99    1.67
   7  -5   4   26.51    1.27
  -7   5  -4   25.67    1.25
  -7   5   4   27.59    1.57
   5   7   4   28.49    1.59
  -5  -7  -5   75.53    2.79
  -7   5  -5   73.40    2.29
  -7   5   5   77.91    2.85
   5   7   5   74.37    2.81
   7  -5   5   67.50    2.20
  -5  -7  -6    3.27    0.64
  -7   5  -6    4.14    0.63
  -7   5   6    4.18    0.73
   5   7   6    4.07    0.59
   5   7   6    4.20    0.78
   7  -5   6    2.94    0.52
  -7   5  -7    6.95    0.82
   5   7   7    7.97    0.85
   7  -5   7    8.72    0.91
   5   7   7    8.36    1.12
  -7   5  -8    4.68    0.72
   5   7   8    4.92    0.75
   7  -5   8    4.84    0.79
   5   7   8    5.07    0.95
  -7   5  -9   10.70    1.09
   7  -5   9   11.50    1.26
   5   7  -9   10.36    1.15
   5   7   9   10.41    1.38
   7  -5  10    3.33    0.79
   5   7 -10    1.87    0.58
   5   7  10    2.18    0.77
   5   7 -11    4.30    1.01
  -7   5 -11    4.02    0.95
  -7   5 -12    4.72    1.03
   5   7 -12    5.89    1.32
   5   7 -13    2.04    0.92
  -7   5 -13    1.61    0.97
  -7   5 -14    1.39    0.90
  -4  -7   0   -0.13    0.20
   4   7   0   -0.22    0.23
  -4  -7   1  514.33    7.23
   7  -4   1  527.14    7.72
   4   7  -1  524.03    7.26
  -4  -7  -1  519.24    7.63
   4   7   1  526.90    7.70
   4   7  -2   21.22    0.91
   7  -4   2   21.72    1.09
  -4  -7  -2   20.89    1.13
   4   7   2   20.76    1.15
   7  -4   3  599.16    8.81
  -4  -7  -3  614.66    9.31
   4   7  -3  614.30    8.31
  -7   4  -3  613.63    8.87
  -7   4   3  617.22    9.37
   4   7   3  610.06    9.37
   7  -4   4   23.24    1.22
  -4  -7  -4   23.15    1.40
  -7   4  -4   23.06    1.21
  -7   4   4   24.64    1.45
   4   7   4   24.83    1.47
  -4  -7  -5  138.93    3.89
  -7   4  -5  135.75    3.36
  -7   4   5  142.30    3.94
   7  -4   5  135.49    3.34
   4   7   5  139.00    3.92
  -4  -7  -6    4.14    0.79
  -7   4  -6    3.69    0.57
   4   7   6    2.71    0.49
  -7   4   6    2.55    0.61
   7  -4   6    3.19    0.53
   4   7   6    3.38    0.73
  -7   4  -7  200.15    4.70
   4   7   7  193.97    4.69
  -7   4   7  206.63    5.50
   4   7   7  211.17    5.74
   7  -4   7  193.84    4.69
  -4  -7  -7  201.24    5.36
  -7   4  -8    0.91    0.40
   4   7   8    1.20    0.45
   4   7   8    0.50    0.53
   4   7  -8    0.80    0.39
   7  -4   8   -0.03    0.41
  -7   4  -9   65.82    2.79
   4   7  -9   63.70    2.70
   4   7   9   63.80    3.25
   7  -4   9   62.94    2.80
   4   7   9   68.38    2.94
  -7   4 -10    0.22    0.43
   4   7 -10    0.53    0.48
   7  -4  10    0.82    0.57
   7  -4  11   33.06    2.24
  -7   4 -11   33.86    2.34
   4   7 -11   34.36    2.71
  -7   4 -12    2.72    0.88
   4   7 -12    3.03    1.11
   4   7 -13   15.28    2.01
  -7   4 -13   11.52    1.55
  -7   4 -14    0.06    0.70
  -3  -7   0    2.29    0.33
   3   7   0    2.11    0.28
   7  -3   1   30.73    1.31
  -3  -7   1   27.32    0.95
   3   7  -1   28.49    0.98
  -3  -7  -1   29.48    1.17
   3   7   1   28.46    1.18
  -7   3  -2  513.13    7.63
   7  -3   2  510.73    7.59
   3   7  -2  499.66    6.67
  -3  -7  -2  495.26    7.56
   3   7   2  507.31    7.65
  -3  -7  -3   16.97    1.09
   7  -3   3   15.06    0.96
  -7   3  -3   18.43    1.05
   3   7  -3   16.84    0.76
  -7   3   3   15.14    1.03
   3   7   3   16.62    1.10
   7  -3   4  210.20    4.29
  -7   3  -4  212.54    4.31
  -7   3   4  213.51    4.69
  -3  -7  -4  218.63    4.70
   3   7   4  210.01    4.68
  -7   3  -5   30.29    1.50
  -7   3   5   29.85    1.70
  -3  -7  -5   25.41    1.49
   7  -3   5   30.19    1.48
   3   7   5   29.36    1.71
  -3  -7  -6    0.72    0.35
  -7   3  -6    0.88    0.39
   3   7   6    0.37    0.35
  -7   3   6    0.32    0.38
   3   7   6    0.73    0.45
   7  -3   6    0.63    0.37
  -3  -7  -7    3.24    0.73
  -7   3  -7    3.71    0.64
  -7   3   7    4.71    0.79
   3   7   7    3.24    0.59
   7  -3   7    3.43    0.65
   3   7   7    2.79    0.64
   3   7  -7    3.17    0.58
  -7   3  -8  101.62    3.41
   3   7   8  104.56    3.95
   3   7   8  103.56    3.51
   3   7  -8  105.52    3.23
   7  -3   8  100.80    3.44
  -7   3  -9    0.62    0.43
   3   7   9    1.15    0.46
  -7   3  -9    0.79    0.45
   7  -3   9    1.26    0.53
   3   7  -9    1.31    0.42
  -7   3 -10    0.16    0.45
   7  -3  10   -0.24    0.54
   3   7 -10   -0.28    0.35
  -7   3 -11    0.26    0.60
   7  -3  11    0.66    0.53
   3   7 -12   18.44    2.08
  -7   3 -12   11.36    1.42
   3   7 -13   -0.42    0.80
  -7   3 -13    1.67    0.77
  -7   3 -14    4.65    1.12
  -7   3 -15    2.42    0.97
   7  -2   0   -0.14    0.29
  -2  -7   0    0.07    0.16
   2   7   0   -0.30    0.21
  -2  -7   1    8.54    0.46
   7  -2   1    8.49    0.70
  -2  -7  -1    7.58    0.56
   2   7  -1    8.86    0.47
   2   7   1    9.27    0.65
   7  -2   2  127.39    2.96
   2   7  -2  125.39    2.08
  -7   2  -2  121.11    2.91
  -7   2   2  125.00    2.88
  -2  -7  -2  125.28    2.86
   2   7   2  124.91    2.89
   7  -2   3    9.56    0.78
  -7   2  -3    9.71    0.79
  -7   2   3    8.80    0.79
   2   7   3    8.83    0.78
  -2  -7  -3    9.53    0.81
  -2  -7  -4    2.45    0.48
   7  -2   4    2.39    0.47
  -7   2  -4    3.40    0.50
  -7   2   4    2.97    0.56
   2   7   4    1.68    0.47
  -7   2  -5   35.13    1.65
   2   7   5   33.29    1.80
  -7   2   5   31.94    1.76
  -2  -7  -5   32.31    1.74
   7  -2   5   30.23    1.52
  -7   2  -6   17.32    1.23
   2   7   6   18.62    1.27
   2   7   6   18.34    1.45
   2   7  -6   17.41    1.01
  -7   2   6   19.66    1.48
   7  -2   6   16.92    1.23
  -2  -7  -6   18.86    1.45
  -7   2  -7   25.11    1.59
   2   7  -7   27.54    1.48
   2   7   7   25.87    1.62
  -2  -7  -7   27.57    1.85
   7  -2   7   24.52    1.58
  -7   2  -8    0.27    0.36
  -7   2  -8    0.93    0.47
   2   7   8    0.76    0.43
   2   7  -8    0.71    0.33
   7  -2   8    1.48    0.55
  -7   2  -9   72.42    2.90
   2   7  -9   65.56    2.59
   7  -2   9   68.52    3.00
  -7   2 -10   36.67    2.17
   7  -2  10   36.73    2.37
   2   7 -10   35.03    1.99
  -7   2 -11   10.75    1.34
   7  -2  11    9.06    1.33
  -7   2 -12    9.87    1.31
   2   7 -12   12.43    1.73
   2   7 -13    0.89    0.76
  -7   2 -13   -0.37    0.57
  -7   2 -14    9.36    1.45
  -7   2 -15    0.43    0.67
   7  -1   0    3.86    0.56
  -1  -7   0    3.00    0.31
   1   7   0    2.79    0.30
   7  -1   1   26.59    1.25
  -1  -7   1   24.35    0.66
  -7   1   1   23.74    1.00
   1   7  -1   25.77    0.70
  -1  -7  -1   26.12    1.01
   1   7   1   25.68    1.04
   7  -1   2   66.49    2.08
  -7   1  -2   71.61    2.14
   1   7   2   72.17    2.14
  -7   1   2   65.81    1.94
  -1  -7  -2   67.81    1.96
   7  -1   3   19.27    1.12
  -7   1  -3   21.17    1.17
   1   7   3   20.42    1.21
  -7   1   3   19.79    1.16
  -1  -7  -3   19.39    1.13
  -7   1  -4   90.79    2.67
   7  -1   4   94.05    2.70
   7  -1  -4   91.28    2.76
   1   7   4   86.60    2.76
   1   7  -4   88.11    1.82
  -7   1   4   90.01    2.80
  -1  -7  -4   92.11    2.78
  -7   1  -5   19.32    1.24
   1   7   5   18.34    1.32
   1   7  -5   19.32    0.91
   7  -1  -5   18.64    1.31
  -1  -7  -5   20.88    1.40
   7  -1   5   17.54    1.15
  -7   1  -6   15.35    1.19
   7  -1  -6   11.82    1.15
   1   7   6   14.01    1.15
  -1  -7  -6   14.75    1.25
   1   7  -6   13.49    0.87
   7  -1   6   16.32    1.24
  -7   1  -7    0.65    0.39
   7  -1  -7    2.26    0.69
   1   7   7    0.73    0.35
  -7   1  -7    1.40    0.41
   7  -1   7    1.11    0.49
   1   7  -7    0.84    0.34
  -1  -7  -7    1.61    0.49
  -7   1  -8    6.26    0.89
   7  -1  -8    6.41    1.03
  -7   1  -8    4.94    0.78
   1   7   8    7.12    0.97
   1   7  -8    5.47    0.68
   7  -1   8    5.64    0.89
   7  -1  -9    1.19    0.66
  -7   1  -9   -0.12    0.42
   7  -1   9    1.39    0.71
   1   7  -9    0.60    0.35
  -7   1 -10    1.39    0.56
   7  -1 -10    1.85    0.82
   1   7 -10    1.29    0.48
   7  -1  10    1.33    0.59
  -7   1 -11    5.49    0.92
   7  -1  11    6.23    1.11
   1   7 -11    6.23    0.96
  -7   1 -12    0.65    0.46
   1   7 -12    1.17    0.80
  -7   1 -13    4.58    0.97
   1   7 -13    2.95    0.82
  -7   1 -14    1.28    0.77
   0  -7   0    0.24    0.14
   7   0   0    0.53    0.34
  -7   0   0    0.09    0.14
   7   0   1  481.42    7.26
  -7   0  -1  484.93    7.29
  -7   0  -1  464.42    5.72
  -7   0   1  460.07    6.60
   0  -7  -1  476.94    6.60
   7   0   2  290.86    5.19
  -7   0  -2  288.11    5.14
   7   0  -2  292.10    4.85
  -7   0   2  288.02    4.93
   0  -7  -2  288.45    4.91
   7   0   3 1116.23   14.75
  -7   0  -3 1107.95   14.74
   7   0  -3 1102.42   14.60
   0  -7  -3 1077.87   14.60
  -7   0  -4   21.87    1.28
   7   0   4   21.40    1.28
   7   0  -4   18.34    1.20
  -7   0  -4   19.62    0.82
   0   7  -4   19.55    0.70
   0  -7  -4   21.00    1.29
  -7   0  -5  456.29    7.73
   7   0  -5  444.75    7.87
  -7   0  -5  440.81    6.54
   7   0   5  428.80    7.51
   0   7  -5  433.07    6.20
   0  -7  -5  450.02    7.95
  -7   0  -6    0.45    0.33
   0   7   6    0.41    0.30
   7   0  -6    0.47    0.43
  -7   0  -6    0.59    0.31
   0  -7  -6    0.48    0.37
   7   0   6    0.57    0.38
   0   7  -6    0.30    0.23
  -7   0  -7  118.75    3.68
   7   0  -7  113.32    3.84
   0   7   7  113.05    3.61
  -7   0  -7  112.82    3.06
   7   0   7  114.05    3.63
   0   7  -7  110.97    2.86
   0  -7  -7  113.60    3.86
  -7   0  -8   34.07    2.01
   7   0  -8   34.41    2.20
  -7   0  -8   32.59    1.72
   0   7   8   32.29    1.99
   7   0   8   34.47    2.05
   0   7  -8   31.93    1.59
  -7   0  -9  169.78    4.48
   7   0  -9  179.58    5.48
   7   0   9  167.00    5.04
   0   7  -9  158.12    4.13
   7   0 -10   -0.56    0.59
  -7   0 -10    0.69    0.49
   0   7 -10    0.15    0.37
   7   0  10   -0.20    0.60
  -7   0 -11   35.42    2.19
   7   0 -11   35.71    2.61
   7   0  11   28.87    2.29
   0   7 -11   31.15    2.00
   7   0 -12    0.88    0.79
  -7   0 -12   -0.12    0.51
   0   7 -12   -0.35    0.72
   0   7 -13   15.23    1.95
  -7   0 -13   14.76    1.86
   7   1   0   27.73    1.28
   1  -7   0   24.68    0.81
   7   1   1   59.44    1.94
  -7  -1  -1   58.75    1.93
   7   1  -1   58.56    1.53
   1  -7  -1   59.01    1.61
   7   1   2   38.58    1.59
  -7  -1  -2   43.93    1.69
   7   1  -2   41.06    1.46
   1  -7  -2   42.63    1.52
   7   1   3   29.78    1.46
  -7  -1  -3   31.52    1.49
   7   1  -3   30.64    1.42
   1  -7  -3   33.38    1.52
  -7  -1  -4  183.12    4.11
   7   1   4  174.51    4.02
  -1   7  -4  168.97    2.60
  -7  -1  -4  169.39    2.80
   7   1  -4  173.33    4.04
   1  -7  -4  171.44    4.10
  -7  -1  -5   41.21    1.92
  -7  -1  -5   36.45    1.27
   7   1  -5   39.74    1.93
  -1   7  -5   37.09    1.15
   1  -7  -5   38.41    1.93
   7   1   5   37.78    1.82
  -7  -1  -6   20.14    1.40
  -1   7   6   23.00    1.51
  -7  -1  -6   19.81    1.06
   7   1  -6   20.59    1.52
  -1   7  -6   21.02    1.01
   7   1   6   20.83    1.45
   1  -7  -6   21.80    1.55
  -7  -1  -7    6.67    0.92
  -1   7  -7    5.71    0.59
  -7  -1  -7    4.29    0.58
   7   1  -7    5.09    0.86
  -1   7   7    4.49    0.75
   1  -7  -7    3.69    0.71
   7   1   7    4.75    0.78
  -1   7  -8    6.16    0.72
   7   1  -8    5.28    0.93
  -7  -1  -8    5.43    0.70
   7   1   8    5.96    0.93
  -1   7  -9    0.18    0.39
  -7  -1  -9   -0.12    0.38
   7   1  -9   -0.32    0.69
   7   1   9    0.00    0.48
  -1   7 -10   12.11    1.13
   7   1 -10   11.88    1.49
  -7  -1 -10   13.19    1.24
   7   1  10   13.79    1.56
  -1   7 -11    0.12    0.38
   7   1 -11    2.96    0.97
  -7  -1 -11    1.52    0.67
   7   1  11    0.34    0.70
   7   1 -12    8.37    1.46
   7   1  12    9.48    1.42
   7   1 -13    0.65    0.85
  -1   7 -13    1.41    0.90
  -1   7 -14    2.04    0.98
   7   2   0   -0.04    0.14
   7   2   0    0.45    0.35
   7   2   1   18.15    1.07
   2  -7  -1   16.31    0.83
   7   2  -1   16.75    0.80
   7   2  -1   15.13    0.96
  -7  -2  -1   16.15    1.00
   7   2   2  300.02    5.43
   2  -7  -2  298.90    5.16
   7   2  -2  299.29    5.06
  -7  -2  -2  300.44    5.42
  -7  -2  -3   49.55    1.92
   7   2   3   50.32    1.94
   2  -7  -3   49.42    1.88
   7   2  -3   48.05    1.83
  -2   7  -4   56.96    1.26
   7   2   4   58.48    2.20
  -7  -2  -4   60.95    2.27
   2  -7  -4   64.29    2.37
   7   2  -4   59.42    2.26
  -2   7  -5   63.23    1.60
  -7  -2  -5   67.39    2.52
   2  -7  -5   75.60    2.91
   7   2  -5   66.81    2.57
   7   2   5   64.93    2.47
  -7  -2  -6  136.99    3.92
  -2   7  -6  127.68    2.81
  -2   7   6  137.23    3.90
   7   2  -6  135.94    4.04
   7   2   6  129.95    3.84
   2  -7  -6  148.16    4.25
  -7  -2  -7   62.49    2.69
   7   2  -7   62.08    2.82
  -2   7   7   61.88    2.69
   7   2   7   63.58    2.74
  -2   7  -7   56.82    1.93
   2  -7  -7   65.03    2.90
   7   2  -8   55.42    2.82
  -2   7  -8   54.32    2.07
   7   2   8   54.57    2.68
   7   2  -9   11.31    1.39
   7   2   9   11.42    1.32
  -2   7  -9   11.59    1.04
  -2   7 -10    6.25    0.80
   7   2 -10    8.55    1.29
   7   2  10    8.10    1.28
  -2   7 -11    5.42    0.86
   7   2 -11    7.11    1.23
   7   2  11   10.46    1.48
   7   2 -12    2.94    0.93
   7   2  12    2.55    1.01
   7   2 -13    0.64    0.72
  -2   7 -13    0.71    0.66
  -2   7 -14    8.92    1.64
   7   3   0    9.79    0.80
   7   3   1    3.86    0.57
  -7  -3  -1    3.98    0.53
   7   3  -1    4.87    0.59
  -7  -3  -2   71.81    2.30
   3  -7   2   73.82    1.31
   7   3   2   75.83    2.34
   7   3   3   15.61    1.11
  -7  -3  -3   12.96    1.00
   3  -7   3   14.15    0.54
  -7  -3  -4   48.40    2.03
  -3   7  -4   46.79    1.20
   3  -7  -4   49.57    2.10
   3  -7   4   47.25    1.25
   7   3  -4   48.74    2.05
   7   3   4   47.85    2.03
  -3   7  -5   79.01    1.88
  -7  -3  -5   81.94    2.84
   3  -7   5   78.15    1.94
   3  -7  -5   79.71    2.93
   7   3  -5   75.34    2.81
   7   3   5   78.50    2.80
  -7  -3  -6   42.00    2.10
  -3   7  -6   40.55    1.45
   3  -7  -6   40.76    2.20
  -3   7   6   42.54    2.12
   7   3  -6   44.21    2.26
   7   3   6   38.68    2.05
  -7  -3  -7    2.61    0.69
  -3   7  -7    2.18    0.42
   7   3  -7    2.79    0.78
  -3   7   7    2.66    0.69
   7   3   7    3.34    0.77
   3  -7  -7    4.06    0.92
  -3   7  -8   78.84    2.54
   7   3  -8   85.11    3.55
   7   3   8   79.29    3.30
  -3   7  -9   13.54    1.11
   7   3  -9   15.72    1.61
   7   3   9   14.11    1.52
  -3   7 -10   12.70    1.19
   7   3 -10   14.44    1.64
   7   3  10   12.78    1.59
  -3   7 -11    0.82    0.43
   7   3 -11    0.14    0.63
   7   3  11    0.45    0.60
   7   3 -12    0.98    0.77
   7   3  12    1.35    0.78
  -3   7 -13    3.67    1.03
   7   3 -13    3.13    1.00
  -3   7 -14    2.99    1.04
   7   4   0    0.26    0.30
  -7  -4   0    0.11    0.26
   7   4   1  123.32    3.06
  -7  -4  -1  119.00    2.99
   7   4  -1  125.52    3.01
   7   4   2    3.92    0.59
  -7  -4  -2    3.39    0.51
   4  -7   2    3.45    0.32
   7   4  -2    4.71    0.60
   4  -7   3  413.64    5.63
  -7  -4  -3  422.53    7.28
   7   4   3  410.89    7.17
   7   4   3  423.97    5.48
   7   4   4    9.27    0.93
  -4   7  -4    7.44    0.50
  -7  -4  -4    9.15    0.91
   7   4   4    8.78    0.54
   4  -7   4    8.35    0.55
  -7  -4  -5  654.52   10.53
  -4   7  -5  635.59    8.69
   7   4   5  653.48   10.55
   4  -7   5  643.63    8.82
  -7  -4  -6    5.20    0.78
  -4   7  -6    4.37    0.50
   7   4  -6    4.55    0.77
  -4   7   6    4.64    0.78
   4  -7   6    4.63    0.54
   4  -7  -6    6.20    0.90
   7   4   6    5.44    0.86
  -4   7  -7  196.01    4.13
  -7  -4  -7  209.30    5.46
  -4   7   7  211.79    5.45
   4  -7  -7  216.12    5.73
   7   4  -7  214.84    5.69
   7   4   7  202.00    5.40
  -4   7  -8    3.01    0.54
   7   4  -8    4.31    0.94
   7   4   8    2.70    0.71
  -4   7  -9  196.10    4.68
   7   4  -9  214.46    6.26
   7   4   9  206.47    5.94
  -4   7 -10    4.56    0.71
   7   4 -10    7.61    1.29
   7   4  10    4.06    1.07
   7   4 -11   44.38    3.00
   7   4  11   39.73    2.79
   7   4 -12    0.62    0.64
   7   4  12    0.69    0.65
   7   4 -13   16.16    2.06
  -4   7 -13   17.67    2.05
  -4   7 -14    0.90    0.75
  -7  -5   0   33.89    1.48
   7   5   0   35.89    1.53
   7   5  -1    2.56    0.48
  -7  -5  -1    1.31    0.38
   7   5   1    2.13    0.48
   5  -7   2   23.19    0.89
  -7  -5  -2   23.16    1.30
   7   5  -2   22.63    1.21
   7   5   2   22.55    1.30
  -7  -5  -3   26.54    1.47
   5  -7   3   26.88    0.99
   7   5   3   28.21    1.53
  -7  -5  -4   34.55    1.77
  -5   7  -4   32.51    1.16
   7   5   4   33.15    1.14
   7   5   4   30.56    1.63
   5  -7   4   34.52    1.20
  -7  -5  -5   47.83    2.20
  -5   7  -5   43.25    1.48
   7   5   5   44.81    1.53
   5  -7   5   43.20    1.51
   7   5   5   45.64    2.18
  -7  -5  -6   18.90    1.48
  -5   7  -6   17.10    0.99
  -5   7   6   20.73    1.54
   7   5   6   17.80    1.45
   5  -7   6   18.79    1.08
  -5   7  -7    1.97    0.42
   5  -7   7    1.62    0.46
   7   5   7    1.90    0.69
  -5   7  -8    0.21    0.39
   7   5  -8    0.61    0.54
   7   5   8    0.56    0.55
   5  -7   8    0.10    0.34
  -5   7  -9   16.40    1.24
   7   5  -9   18.44    1.78
   7   5   9   18.79    1.76
  -5   7 -10   11.65    1.14
   7   5 -10   14.18    1.69
   7   5  10   13.16    1.65
   7   5 -11    1.70    0.82
   7   5  11    2.13    0.91
   7   5 -12    3.53    1.06
   7   5  12    5.52    1.23
   7   5 -13   -1.34    1.07
  -5   7 -13    0.24    0.66
  -5   7 -14    0.16    0.72
   7   6   0   -0.04    0.29
  -7  -6   0    0.44    0.34
  -7  -6  -1    2.29    0.45
   6  -7   1    3.45    0.44
   7   6  -1    2.84    0.48
   7   6   1    1.65    0.41
   6  -7   2    0.24    0.25
  -7  -6  -2    0.12    0.27
   7   6  -2   -0.06    0.27
   7   6   2   -0.40    0.33
   7   6  -3   42.40    1.72
   7   6   3   47.29    2.03
   6  -7   3   44.57    1.42
  -7  -6  -3   46.58    2.00
  -6   7  -4  108.73    2.53
   6  -7   4  116.39    2.60
  -7  -6  -4  119.10    3.51
   7   6   4  117.40    3.48
  -7  -6  -5   47.20    2.23
  -6   7  -5   46.41    1.62
   7   6   5   45.96    1.60
   6  -7   5   50.07    1.71
   7   6   5   45.98    2.22
  -7  -6  -6   37.70    2.10
  -6   7  -6   37.84    1.57
  -6   7   6   42.39    2.23
   7   6   6   37.82    1.60
   7   6   6   38.33    2.16
   6  -7   6   38.51    1.61
  -6   7  -7   46.09    1.88
   6  -7   7   49.38    1.99
   7   6   7   46.17    2.49
  -6   7  -8   66.53    2.47
   6  -7   8   77.18    2.73
   7   6   8   69.62    3.26
  -6   7  -9    5.80    0.83
   7   6  -9    7.37    1.22
   7   6   9    8.15    1.23
   6  -7   9    8.82    1.00
  -6   7 -10   15.64    1.35
   7   6 -10   22.45    2.10
   7   6  10   20.75    2.03
   7   6 -11    5.92    1.14
   7   6  11    6.11    1.22
   7   6 -12    5.16    1.22
  -6   7 -13    0.86    0.76
  -6   7 -14    7.71    1.46
  -7  -7   0  259.26    4.94
   7   7   0  253.55    4.89
   7  -7   1    7.48    0.65
  -7  -7  -1    7.38    0.73
   7   7  -1    7.00    0.69
   7   7   1    7.11    0.75
  -7  -7  -2  132.97    3.46
   7   7  -2  133.57    3.16
   7  -7   2  127.05    2.84
   7   7   2  132.78    3.47
   7   7  -3   32.51    1.48
   7  -7   3   34.70    1.35
  -7  -7  -3   32.51    1.71
   7   7   3   33.54    1.73
  -7   7  -4   87.87    2.34
   7  -7   4   78.60    2.22
  -7  -7  -4   83.84    2.93
   7   7   4   82.06    2.92
  -7  -7  -5   10.46    1.09
  -7   7  -5   11.54    0.86
  -7   7   5   10.71    1.14
   7   7   5   11.14    0.81
   7   7   5   10.12    1.13
   7  -7   5    9.94    0.79
  -7  -7  -6   83.20    3.24
  -7   7  -6   81.48    2.47
  -7   7   6   84.85    3.27
   7   7   6   82.18    2.48
   7   7   6   85.63    3.32
   7  -7   6   83.19    2.53
  -7   7  -7    0.22    0.31
   7   7   7    0.02    0.30
   7  -7   7    0.14    0.32
   7   7   7    0.52    0.52
  -7   7  -8   81.08    2.79
   7   7   8   86.14    3.70
   7  -7   8   83.78    2.92
  -7   7  -9    0.64    0.36
   7   7   9    1.09    0.73
   7  -7   9    0.50    0.46
  -7   7 -10    4.53    0.83
   7   7 -10    7.99    1.38
   7   7  10    4.55    1.10
   7  -7  10    5.12    0.86
   7   7 -11    8.49    1.47
   7   7  11    6.58    1.31
   7   7 -12   11.66    1.80
  -7   7 -13    0.43    0.70
  -7   7 -14    7.87    1.40
  -7  -8   0    0.54    0.36
   7   8   0   -0.26    0.34
   8  -7   1  636.18    9.33
  -7  -8  -1  646.90    9.78
   7   8  -1  661.61    9.59
   7   8   1  635.39    9.79
   8  -7   2   47.30    1.72
  -7  -8  -2   49.23    2.05
   7   8  -2   50.08    1.82
   7   8   2   46.66    2.01
   7   8  -3  192.97    4.01
  -7  -8  -3  190.53    4.55
   8  -7   3  182.70    3.80
   7   8   3  178.37    4.37
   7   8  -4   80.66    2.46
  -7  -8  -4   80.71    2.93
   8  -7   4   76.24    2.30
   7   8   4   76.28    2.87
  -7  -8  -5  305.47    6.61
  -8   7  -5  293.73    5.49
  -8   7   5  303.99    6.59
   7   8   5  310.47    6.69
   8  -7   5  299.49    5.52
  -8   7  -6    2.64    0.49
   7   8   6    3.02    0.52
   8  -7   6    2.89    0.55
   7   8   6    3.59    0.75
  -8   7  -7  208.25    4.70
   7   8   7  212.42    4.75
   8  -7   7  211.34    4.81
   7   8   7  211.69    5.85
  -8   7  -8   16.31    1.27
   7   8   8   15.75    1.26
   7   8   8   15.75    1.65
   8  -7   8   17.51    1.34
  -8   7  -9   27.91    1.76
   8  -7   9   27.11    1.79
   7   8   9   29.64    2.38
   8  -7  10    1.29    0.61
   7   8  10    1.63    0.91
   7   8  11   38.70    2.87
   7   8 -11   38.89    3.01
   7   8 -12    1.06    0.86
  -8   7 -13   12.16    1.66
  -8   7 -14   -1.21    0.79
  -6  -8   0   46.83    1.72
   6   8   0   46.90    1.74
   6   8  -1    4.16    0.51
  -6  -8  -1    4.51    0.59
   8  -6   1    3.50    0.51
   6   8   1    5.53    0.65
   8  -6   2    7.88    0.71
   6   8  -2    8.18    0.68
  -6  -8  -2    8.74    0.84
   6   8   2    8.60    0.85
   6   8  -3    9.73    0.76
   6   8   3   10.09    0.93
  -6  -8  -3   10.09    0.95
   8  -6   3    9.48    0.78
  -8   6  -4    9.38    0.79
   6   8  -4    8.47    0.75
  -6  -8  -4   10.38    1.04
   8  -6   4   10.22    0.83
   6   8   4   10.97    1.07
  -6  -8  -5   93.99    3.27
  -8   6  -5   86.59    2.62
  -8   6   5   88.15    3.19
   6   8   5   94.65    3.30
   8  -6   5   88.39    2.63
  -6  -8  -6    6.86    0.96
   8  -6   6    6.67    0.76
  -8   6  -6    7.22    0.77
   6   8   6    5.94    0.72
  -8   6   6    5.66    0.85
   6   8   6    5.50    0.92
  -8   6  -7   51.12    2.16
   6   8   7   54.87    2.24
   8  -6   7   54.61    2.26
   6   8   7   51.33    2.70
  -8   6  -8   -0.48    0.44
   6   8   8   -0.35    0.47
   6   8   8    0.46    0.52
   8  -6   8   -0.34    0.45
  -8   6  -9    9.41    1.06
   6   8   9   10.60    1.14
   8  -6   9   10.90    1.19
   6   8   9   11.63    1.48
   6   8  10    8.48    1.39
   8  -6  10    7.14    1.04
   8  -6  11   22.09    1.87
   6   8 -11   26.42    2.48
  -8   6 -12    0.09    0.54
   6   8 -12    1.28    0.87
  -8   6 -13   16.28    1.88
  -8   6 -14   -0.62    0.68
  -5  -8   0    0.01    0.21
   5   8   0   -0.01    0.25
   8  -5   1   46.83    1.74
   5   8  -1   48.05    1.58
  -5  -8  -1   46.67    1.73
   5   8   1   47.04    1.74
   5   8  -2  127.49    2.73
   8  -5   2  123.11    2.99
  -5  -8  -2  119.72    3.12
   5   8   2  123.41    3.18
   5   8  -3    0.12    0.21
   8  -5   3    0.20    0.26
  -5  -8  -3    0.77    0.38
   5   8   3    0.67    0.46
   8  -5   4   71.42    2.28
  -5  -8  -4   71.01    2.62
  -8   5  -4   69.14    2.25
  -8   5   4   74.18    2.67
   5   8   4   73.07    2.66
  -5  -8  -5  148.49    4.11
   8  -5   5  138.83    3.49
  -8   5  -5  137.67    3.48
  -8   5   5  144.16    4.12
   5   8   5  137.70    4.03
  -5  -8  -6    3.52    0.66
   8  -5   6    2.71    0.57
  -8   5  -6    2.71    0.55
   5   8   6    2.38    0.46
  -8   5   6    2.08    0.47
   5   8   6    4.04    0.78
  -8   5  -7   19.85    1.37
   5   8   7   18.72    1.33
   8  -5   7   21.59    1.45
   5   8   7   21.49    1.75
  -8   5  -8   11.76    1.13
   5   8   8   11.37    1.12
   8  -5   8   11.40    1.16
   5   8   8   10.10    1.38
  -8   5  -9   15.87    1.38
   5   8  -9   15.91    1.36
   5   8   9   14.43    1.34
   5   8   9   13.37    1.52
   8  -5   9   17.45    1.49
   5   8 -10   16.46    1.49
   5   8  10   15.43    1.74
   8  -5  10   15.76    1.54
  -8   5 -11    5.08    0.98
   8  -5  11    5.02    0.99
  -8   5 -12   14.69    1.67
   5   8 -12   16.41    2.08
  -8   5 -13    0.62    0.72
  -8   5 -14    5.38    1.18
  -4  -8   0 1255.63   15.70
   4   8   0 1254.39   15.75
  -4  -8   1   19.42    0.90
   8  -4   1   18.29    1.07
  -4  -8  -1   17.78    1.00
   4   8  -1   18.67    0.89
   4   8   1   17.32    0.98
   8  -4   2 1419.51   18.01
  -4  -8  -2 1389.55   18.05
   4   8  -2 1399.32   17.11
   4   8   2 1421.48   18.16
   8  -4   3   62.94    2.10
  -4  -8  -3   66.58    2.31
   4   8  -3   68.00    1.75
  -8   4  -3   67.71    2.18
  -8   4   3   66.23    2.31
   4   8   3   66.61    2.34
  -4  -8  -4  412.75    7.36
   8  -4   4  400.73    6.83
  -8   4  -4  409.75    6.88
  -8   4   4  413.77    7.44
   4   8   4  404.35    7.38
   8  -4   5   12.97    1.04
  -4  -8  -5   12.01    1.12
  -8   4  -5   10.95    0.91
  -8   4   5   11.76    1.11
   4   8   5   11.93    1.13
  -8   4  -6  390.28    7.13
   4   8   6  385.18    7.03
   4   8   6  397.65    7.99
  -8   4   6  407.68    8.03
  -4  -8  -6  407.25    7.95
   8  -4   6  390.47    7.15
  -8   4  -7    4.88    0.73
   4   8   7    3.81    0.61
   4   8   7    3.96    0.81
   8  -4   7    4.28    0.75
  -8   4  -8  184.71    4.84
   4   8  -8  187.35    4.54
   4   8   8  191.45    5.58
   4   8   8  192.13    4.96
   8  -4   8  188.73    4.90
   4   8   9   31.73    2.30
   4   8  -9   30.69    1.84
   4   8   9   32.13    2.04
   8  -4   9   29.89    1.97
   8  -4  10   56.06    2.98
  -8   4 -10   61.36    2.93
   4   8 -10   57.54    2.63
  -8   4 -11   15.40    1.56
   8  -4  11   13.42    1.49
  -8   4 -12   28.82    2.21
   4   8 -12   27.81    2.56
   4   8 -13   -1.13    0.97
  -8   4 -13   -0.07    0.53
  -8   4 -14    8.74    1.44
   8  -3   0   -0.02    0.28
  -3  -8   0   -0.08    0.22
   3   8   0    0.12    0.20
   8  -3   1  415.10    6.74
  -3  -8   1  412.02    5.81
   3   8  -1  419.76    5.85
  -3  -8  -1  414.80    6.32
   3   8   1  423.48    6.43
   3   8  -2  189.51    3.10
  -3  -8  -2  189.13    3.85
   8  -3   2  185.98    3.92
  -8   3   2  190.75    3.93
   3   8   2  184.19    3.88
   8  -3   3  916.34   12.67
  -3  -8  -3  934.83   12.88
   3   8  -3  919.71   11.36
  -8   3  -3  928.89   12.71
  -8   3   3  908.52   12.89
   3   8   3  892.54   12.85
  -3  -8  -4    2.43    0.48
   8  -3   4    2.84    0.49
  -8   3  -4    2.65    0.51
  -8   3   4    2.71    0.52
   3   8   4    2.71    0.59
  -3  -8  -5    8.54    0.92
   8  -3   5    9.98    0.92
  -8   3  -5    9.39    0.87
  -8   3   5    9.55    1.02
   3   8   5    7.81    0.97
  -8   3  -6   11.43    1.01
  -3  -8  -6   11.66    1.11
   3   8   6   13.63    1.10
  -8   3   6   12.38    1.20
   8  -3   6   12.49    1.08
   3   8   6   12.41    1.23
  -8   3  -7  184.52    4.68
   3   8   7  186.47    5.22
   3   8   7  185.91    4.67
   3   8  -7  183.57    4.07
   8  -3   7  185.18    4.69
  -8   3  -8   41.76    2.17
   3   8   8   40.78    2.46
   3   8  -8   47.13    2.09
   3   8   8   39.54    2.14
   8  -3   8   44.98    2.28
  -8   3  -9   21.68    1.59
   8  -3   9   19.30    1.61
   3   8  -9   17.63    1.35
  -8   3 -10    0.70    0.44
   3   8 -10    0.36    0.37
   8  -3  10    0.64    0.57
  -8   3 -11   20.31    1.76
   8  -3  11   18.64    1.79
  -8   3 -12   -0.74    0.60
   3   8 -12   -0.66    0.81
   8  -3  12   -0.23    0.62
   3   8 -13   14.70    2.01
  -8   3 -13   15.31    1.68
  -8   3 -14    1.31    0.71
   8  -2   0   18.07    1.12
  -2  -8   0   19.29    0.82
   2   8   0   18.87    0.83
  -2  -8  -1  112.38    2.48
   8  -2   1  109.92    2.82
  -2  -8   1  106.09    1.98
  -8   2   1  112.05    2.52
   2   8   1  111.25    2.51
   2   8  -1  106.96    1.99
   2   8  -2   65.82    1.34
  -2  -8  -2   65.10    2.01
   8  -2   2   66.84    2.17
  -8   2  -2   63.31    2.12
  -8   2   2   63.76    2.02
   2   8   2   67.56    2.07
  -2  -8  -3    6.76    0.67
   8  -2   3    7.40    0.74
   2   8  -3    9.03    0.44
  -8   2  -3    9.82    0.84
  -8   2   3    8.46    0.81
   2   8   3    7.30    0.74
   8  -2   4    0.67    0.34
  -2  -8  -4    1.52    0.43
  -8   2  -4    0.53    0.34
  -8   2   4    0.18    0.29
   2   8   4    0.35    0.38
  -2  -8  -5    1.96    0.52
   8  -2   5    2.02    0.48
  -8   2  -5    2.03    0.48
  -8   2   5    1.71    0.48
   2   8   5    3.30    0.66
  -2  -8  -6    3.20    0.63
   8  -2   6    2.13    0.52
  -8   2  -6    2.89    0.57
  -8   2   6    2.13    0.56
   2   8   6    3.21    0.60
   2   8  -6    3.02    0.45
   2   8   6    2.66    0.62
  -8   2  -7   38.01    2.01
   2   8   7   38.89    2.01
   2   8  -7   38.10    1.61
   8  -2   7   36.23    1.96
  -2  -8  -7   35.65    2.13
  -8   2  -8   48.43    2.39
   2   8   8   45.77    2.36
  -8   2  -8   49.17    2.19
   2   8  -8   45.29    1.93
   8  -2   8   46.22    2.35
  -8   2  -9    5.77    0.85
   8  -2   9    6.31    0.97
   2   8  -9    5.99    0.79
  -8   2 -10    1.61    0.55
   2   8 -10    0.48    0.43
   8  -2  10    1.38    0.65
   8  -2  11   82.49    3.78
  -8   2 -11   85.98    3.56
  -8   2 -12    0.80    0.66
   8  -2  12    0.70    0.61
  -8   2 -13   17.12    1.75
   2   8 -13   14.98    1.96
  -8   2 -14    1.90    0.88
  -1  -8   0    0.22    0.16
   8  -1   0    0.06    0.32
  -8   1   0    0.29    0.19
   1   8   0    0.11    0.17
   8  -1   1  222.18    4.42
  -1  -8   1  215.46    3.10
  -8   1   1  226.26    3.91
   1   8   1  232.47    3.99
   1   8  -1  225.14    3.18
  -1  -8  -1  226.23    3.87
   8  -1   2   15.09    1.05
  -8   1  -2   15.77    1.03
   1   8   2   21.67    1.13
  -8   1   2   15.54    0.94
  -1  -8  -2   13.61    0.88
   8  -1   3  175.55    3.91
   1   8  -3  168.86    2.31
  -8   1  -3  174.88    3.92
   1   8   3  172.59    3.87
  -8   1   3  173.38    3.89
  -1  -8  -3  178.58    3.87
   8  -1   4   24.08    1.37
  -8   1  -4   24.08    1.37
   1   8   4   25.10    1.48
   1   8  -4   24.82    0.83
  -8   1   4   23.59    1.41
  -1  -8  -4   23.98    1.40
  -8   1  -5   13.59    1.09
   1   8  -5   13.67    0.71
  -1  -8  -5   14.61    1.20
   8  -1   5   14.07    1.13
   8  -1   6    5.32    0.77
  -8   1  -6    5.25    0.73
   1   8   6    7.34    0.88
  -8   1  -6    7.37    0.68
   8  -1  -6    6.26    0.86
  -1  -8  -6    5.88    0.89
   1   8  -6    6.48    0.57
  -8   1  -7   57.75    2.51
   8  -1  -7   53.29    2.61
   1   8   7   57.52    2.50
  -8   1  -7   56.37    2.11
  -1  -8  -7   57.80    2.72
   8  -1   7   57.18    2.52
   1   8  -7   52.21    1.84
  -8   1  -8   30.17    1.90
   8  -1  -8   30.44    2.07
  -8   1  -8   30.80    1.66
   1   8   8   32.75    2.01
   1   8  -8   27.33    1.44
   8  -1   8   30.01    1.93
  -8   1  -9    8.68    1.00
   8  -1  -9    8.83    1.19
   1   8  -9    6.10    0.80
   8  -1   9    7.97    1.12
  -8   1 -10   12.02    1.22
   1   8 -10   11.60    1.10
   8  -1  10   11.11    1.36
  -8   1 -11    7.33    1.09
   1   8 -11    6.43    0.98
   8  -1  11    6.64    1.20
  -8   1 -12   13.03    1.46
   8  -1  12   14.60    1.77
  -8   1 -13    0.35    0.50
   1   8 -13   -0.11    0.72
  -8   1 -14    5.74    1.18
   8   0   0 1143.00   14.88
  -8   0   0 1083.73   13.43
   0  -8   0 1125.06   13.40
   0  -8   1  216.30    2.87
   8   0   1  222.16    4.42
  -8   0  -1  222.27    4.46
  -8   0  -1  214.53    3.00
  -8   0   1  214.75    3.77
   0  -8  -1  219.18    3.74
  -8   0  -2 2317.76   27.92
   8   0   2 2251.36   27.85
   0  -8  -2 2237.28   27.26
   8   0   3  107.75    2.99
  -8   0  -3  112.78    3.06
   8   0  -3  111.51    2.89
   0  -8  -3  111.84    2.94
   8   0   4  312.04    5.88
  -8   0  -4  306.97    5.88
   8   0  -4  301.46    5.80
  -8   0  -4  297.63    4.37
   0   8  -4  302.93    3.94
   0  -8  -4  298.04    5.87
  -8   0  -5   21.53    1.40
  -8   0  -5   20.59    0.94
   8   0  -5   18.62    1.34
   0   8  -5   19.28    0.78
   0  -8  -5   22.04    1.47
   8   0   5   19.22    1.34
  -8   0  -6  352.77    6.85
   8   0  -6  330.32    6.94
  -8   0  -6  337.60    5.57
   8   0   6  327.63    6.70
   0   8  -6  331.43    5.23
   0  -8  -6  343.92    7.11
  -8   0  -7   14.66    1.29
   8   0  -7   14.08    1.37
   0   8   7   15.76    1.32
  -8   0  -7   15.73    1.08
   0  -8  -7   16.05    1.44
   8   0   7   14.72    1.33
   0   8  -7   13.93    0.90
  -8   0  -8  406.09    7.12
   8   0  -8  393.99    8.48
   0   8  -8  381.33    6.68
   8   0   8  397.01    8.11
   8   0  -9   44.21    2.65
  -8   0  -9   40.23    2.02
   8   0   9   39.46    2.36
   0   8  -9   40.49    1.90
   8   0 -10   36.78    2.61
  -8   0 -10   39.69    2.15
   0   8 -10   34.26    1.87
   8   0  10   38.62    2.47
   0   8 -11    7.68    0.98
   8   0 -11    7.73    1.32
  -8   0 -11    8.41    1.10
   8   0  11    8.99    1.35
   8   0 -12   41.80    3.05
   8   0  12   37.52    2.69
  -8   0 -12   37.01    2.34
   0   8 -13   -0.05    0.65
   8   1   0    0.04    0.31
   1  -8   0   -0.07    0.14
   1  -8   1  112.68    1.66
   8   1  -1  108.58    2.98
   8   1   1  114.33    2.96
  -8  -1  -1  113.99    2.99
   8   1  -1  115.51    2.37
   1  -8  -1  113.71    2.45
   8   1   2   15.91    1.06
  -8  -1  -2   14.66    1.02
   8   1  -2   14.81    0.88
   1  -8  -2   15.34    0.94
   8   1   3  355.64    6.43
  -8  -1  -3  365.50    6.46
   8   1  -3  355.43    6.15
   1  -8  -3  353.51    6.22
  -8  -1  -4   17.86    1.25
   8   1   4   16.49    1.16
  -1   8  -4   17.04    0.49
   8   1  -4   16.87    1.18
   1  -8  -4   18.04    1.25
  -1   8  -5   43.25    1.16
  -8  -1  -5   43.41    2.02
  -8  -1  -5   39.50    1.24
   8   1  -5   43.42    2.05
   8   1   5   39.50    1.92
   1  -8  -5   43.76    2.09
  -1   8  -6    0.29    0.23
   8   1   6    0.64    0.54
  -8  -1  -6    0.51    0.41
  -8  -1  -6    0.29    0.21
   8   1  -6    0.24    0.42
   1  -8  -6    0.74    0.53
  -8  -1  -7   55.16    2.51
  -8  -1  -7   48.55    1.82
   8   1  -7   50.89    2.56
  -1   8   7   53.95    2.50
  -1   8  -7   46.17    1.62
   8   1   7   50.72    2.45
   1  -8  -7   52.45    2.62
   8   1  -8   18.34    1.63
  -8  -1  -8   17.56    1.18
  -1   8  -8   15.43    1.00
   8   1   8   18.60    1.61
  -8  -1  -9   27.86    1.62
   8   1  -9   27.91    2.13
  -1   8  -9   21.75    1.30
   8   1   9   26.49    1.99
  -1   8 -10    4.76    0.72
   8   1 -10    5.29    1.11
  -8  -1 -10    4.58    0.81
   8   1  10    3.86    0.83
   8   1 -11   18.58    1.97
  -1   8 -11   16.50    1.38
   8   1  11   18.38    1.88
   8   1 -12   -0.64    0.65
   8   1  12    0.67    0.67
   8   1 -13    3.74    1.18
  -1   8 -13    4.27    1.14
   8   2   0    7.48    0.44
   2  -8   0    7.06    0.49
   8   2   0    8.55    0.78
   2  -8  -1   29.56    1.18
   2  -8   1   28.02    0.75
   8   2  -1   26.98    1.04
  -8  -2  -1   29.28    1.43
   8   2  -1   29.97    1.46
   8   2   1   28.59    1.42
   8   2   2  117.21    3.12
  -8  -2  -2  122.72    3.17
   2  -8  -2  113.79    2.83
   8   2  -2  114.51    2.73
   8   2   3    6.81    0.79
  -8  -2  -3    6.93    0.77
   8   2  -3    6.31    0.69
   2  -8  -3    7.77    0.81
   8   2   4   11.02    1.02
  -8  -2  -4   11.70    1.01
  -2   8  -4   10.96    0.42
   2  -8  -4   13.79    1.13
   8   2  -4   11.52    0.99
  -8  -2  -5   67.84    2.58
  -2   8  -5   60.69    1.45
   8   2  -5   63.51    2.53
   8   2   5   60.22    2.42
   2  -8  -5   67.81    2.65
  -2   8  -6    3.59    0.42
   8   2   6    4.61    0.80
  -8  -2  -6    3.62    0.67
   8   2  -6    3.43    0.67
  -2   8   6    3.23    0.72
   2  -8  -6    4.20    0.79
  -2   8  -7  146.58    3.25
  -8  -2  -7  162.72    4.60
  -2   8   7  162.50    4.62
   8   2  -7  161.45    4.77
   8   2   7  159.80    4.60
   2  -8  -7  168.91    4.95
  -2   8  -8   26.66    1.38
   8   2  -8   29.55    2.07
   8   2   8   27.79    1.93
  -2   8  -9    4.93    0.67
   8   2  -9    4.84    1.00
   8   2   9    4.69    0.93
  -2   8 -10    7.78    0.91
   8   2 -10    9.74    1.41
   8   2  10    7.43    1.16
  -2   8 -11   29.82    1.89
   8   2  11   36.97    2.66
   8   2 -11   38.12    2.82
   8   2 -12   -0.22    0.75
   8   2  12    0.63    0.60
   8   2 -13   17.92    2.18
  -2   8 -13   14.55    1.97
   8   3   0    0.08    0.16
   8   3   0    0.40    0.31
   8   3   1  115.88    3.07
   8   3   1  118.23    1.77
   8   3  -1  116.03    2.52
   8   3  -1  116.65    3.03
  -8  -3  -1  117.02    3.08
   8   3   2   12.15    0.99
   3  -8   2   11.47    0.40
  -8  -3  -2   12.35    0.99
   8   3  -2   10.81    0.77
   8   3   3  157.30    3.89
  -8  -3  -3  159.19    3.89
   3  -8  -3  157.72    3.77
   8   3  -3  158.98    3.71
   3  -8   3  153.57    2.22
   8   3   4   61.17    2.39
  -8  -3  -4   64.06    2.47
  -3   8  -4   58.68    1.26
   3  -8   4   62.10    1.34
   3  -8  -4   67.19    2.50
   8   3  -4   64.05    2.39
  -8  -3  -5  102.37    3.30
  -3   8  -5   95.14    2.01
   3  -8  -5  104.17    3.43
   8   3  -5  101.68    3.31
   8   3   5   93.12    3.11
  -3   8  -6   23.04    1.03
  -8  -3  -6   27.66    1.74
  -3   8   6   25.97    1.69
   8   3  -6   23.51    1.66
   3  -8  -6   26.72    1.89
   8   3   6   24.11    1.70
  -3   8  -7  291.95    5.14
   3  -8  -7  313.71    7.17
   8   3  -7  301.67    6.98
   8   3   7  295.78    6.77
  -3   8  -8    6.72    0.70
   8   3  -8    7.84    1.10
   8   3   8    8.71    1.17
  -3   8  -9    1.83    0.45
   8   3  -9    1.46    0.71
   8   3   9    1.35    0.59
  -3   8 -10    1.26    0.51
   8   3 -10    3.54    0.92
   8   3  10    2.08    0.74
   8   3 -11   16.67    1.90
   8   3  11   19.75    2.00
   8   3 -12    6.75    1.35
   8   3  12    7.68    1.37
   8   3 -13    4.93    1.28
  -3   8 -13    5.54    1.18
  -3   8 -14   -0.03    0.72
   8   4   0  128.53    3.23
   8   4  -1   16.77    1.09
  -8  -4  -1   19.32    1.18
   8   4   1   21.34    1.27
  -8  -4  -2  853.83   12.28
   8   4  -2  860.16   12.09
   8   4   2  844.44   12.22
   4  -8   2  846.96   10.31
   8   4   3    4.94    0.68
  -8  -4  -3    4.93    0.69
   8   4   3    5.07    0.29
   4  -8   3    5.05    0.35
  -4   8  -4  700.62    8.99
   8   4   4  719.15   11.19
  -8  -4  -4  752.38   11.35
   4  -8   4  712.20    9.05
  -8  -4  -5   25.55    1.63
  -4   8  -5   21.52    0.91
   4  -8  -5   24.61    1.63
   4  -8   5   25.23    1.04
   8   4  -5   24.38    1.62
   8   4   5   25.29    1.66
  -4   8  -6  524.54    7.63
  -8  -4  -6  538.44    9.61
   4  -8   6  533.21    7.79
  -4   8   6  541.40    9.61
   4  -8  -6  545.58    9.94
   8   4  -6  526.76    9.73
   8   4   6  522.42    9.55
  -4   8  -7    4.03    0.52
   8   4  -7    3.66    0.79
   8   4   7    3.54    0.84
  -4   8  -8  314.82    5.86
   8   4  -8  346.02    7.97
   8   4   8  338.14    7.67
  -4   8  -9    2.26    0.51
   8   4  -9    2.04    0.83
   8   4   9    0.96    0.62
  -4   8 -10   36.44    1.92
   8   4  10   36.28    2.54
   8   4 -10   34.79    2.57
   8   4 -11    0.26    0.63
   8   4  11   -0.50    0.66
   8   4  12   39.39    2.97
   8   4 -12   45.17    3.23
   8   4 -13   -1.60    0.89
  -4   8 -13    0.34    0.71
  -4   8 -14   18.16    2.18
   8   5   0    0.07    0.31
  -8  -5   0    0.19    0.30
   8   5   1    2.91    0.56
  -8  -5  -1    3.18    0.53
   8   5  -1    3.46    0.56
   8   5  -2   71.39    2.32
   5  -8   2   67.69    1.60
  -8  -5  -2   65.90    2.37
   8   5   2   65.91    2.37
   5  -8   3  135.56    2.50
   8   5   3  134.75    3.65
  -8  -5  -3  138.15    3.72
  -8  -5  -4   71.26    2.68
   8   5   4   66.40    1.58
   5  -8   4   65.37    1.67
   8   5   4   64.63    2.57
  -8  -5  -5  111.96    3.56
  -5   8  -5  103.23    2.34
   8   5   5  106.23    2.39
   5  -8   5  109.92    2.46
   8   5   5  103.75    3.46
  -8  -5  -6    9.89    1.11
  -5   8  -6   11.87    0.79
  -5   8   6   11.15    1.17
   5  -8   6   11.86    0.83
   8   5   6   11.11    1.19
  -5   8  -7    0.91    0.30
   8   5  -7   -0.24    0.57
   8   5   7    0.99    0.60
   5  -8   7    1.08    0.37
  -5   8  -8   22.15    1.30
   8   5  -8   22.52    1.88
   8   5   8   22.28    1.84
  -5   8  -9   18.85    1.31
   8   5  -9   19.63    1.88
   8   5   9   19.40    1.80
  -5   8 -10    5.04    0.81
   8   5 -10    3.83    1.00
   8   5  10    2.48    0.90
   8   5 -11   14.80    1.81
   8   5  11   11.89    1.64
   8   5 -12    1.05    0.78
   8   5  12    2.67    1.00
  -5   8 -13    1.10    0.71
  -5   8 -14    4.65    1.30
  -8  -6   0    8.49    0.81
   8   6   0   10.07    0.88
   6  -8   1  161.55    3.16
  -8  -6  -1  163.20    3.89
   8   6  -1  161.39    3.75
   8   6   1  164.06    3.90
   6  -8   2   32.12    1.17
  -8  -6  -2   31.51    1.62
   8   6  -2   32.23    1.55
   8   6   2   32.33    1.66
   8   6  -3   23.80    1.34
   6  -8   3   28.41    1.09
  -8  -6  -3   29.73    1.66
   8   6   3   25.87    1.54
  -8  -6  -4   30.29    1.75
   8   6   4   29.71    1.09
   6  -8   4   30.95    1.19
   8   6   4   31.43    1.77
  -8  -6  -5   78.78    2.99
  -6   8  -5   68.14    1.96
   8   6   5   74.39    2.00
   8   6   5   70.53    2.88
   6  -8   5   76.60    2.09
  -6   8  -6    0.57    0.27
   8   6   6    0.51    0.25
   8   6   6    0.54    0.42
   6  -8   6   -0.12    0.28
  -6   8  -7   93.53    2.69
   6  -8   7  105.88    2.91
   8   6   7   99.50    3.81
  -6   8  -8   39.59    1.81
   6  -8   8   42.40    1.94
   8   6  -8   41.22    2.58
   8   6   8   37.74    2.43
  -6   8  -9   26.70    1.58
   8   6  -9   27.56    2.25
   8   6   9   31.69    2.34
  -6   8 -10    1.83    0.56
   8   6 -10    1.60    0.79
   8   6  10    1.78    0.73
   8   6 -11    4.99    1.21
   8   6  11    4.07    1.03
   8   6 -12    2.75    1.07
   8   6  12    4.10    1.10
  -6   8 -13    8.05    1.50
  -6   8 -14    0.69    0.82
   8   7   0   -0.22    0.33
  -8  -7   0    0.08    0.29
   7  -8   1  177.84    3.58
  -8  -7  -1  176.46    4.15
   8   7  -1  187.79    4.10
   8   7   1  183.87    4.23
  -8  -7  -2   15.05    1.16
   7  -8   2   15.34    0.88
   8   7  -2   15.74    1.09
   8   7   2   15.76    1.19
   8   7  -3  229.02    4.74
  -8  -7  -3  232.26    5.21
   8   7   3  228.01    5.17
   7  -8   3  225.47    4.08
   7  -8   4   23.19    1.11
  -8  -7  -4   26.91    1.68
   8   7   4   22.78    1.54
  -8  -7  -5  185.95    4.90
  -7   8  -5  170.39    3.64
   8   7   5  179.13    3.58
   7  -8   5  178.47    3.69
   8   7   5  191.34    5.02
  -7   8  -6    0.40    0.34
   8   7   6   -0.09    0.28
   7  -8   6   -0.12    0.26
   8   7   6   -0.09    0.46
  -7   8  -7  151.15    3.67
   8   7   7  154.74    3.78
   8   7   7  158.19    4.93
   7  -8   7  157.95    3.81
  -7   8  -8   12.18    1.03
   8   7   8   15.49    1.60
   7  -8   8   11.82    1.08
  -7   8  -9    5.62    0.78
   8   7  -9    4.43    1.02
   8   7   9    5.01    1.09
   7  -8   9    5.45    0.82
  -7   8 -10    0.07    0.38
   8   7 -10   -1.43    0.88
   8   7  10    1.42    0.95
   8   7 -11   26.46    2.46
   8   7  11   22.46    2.24
   8   7 -12    1.88    0.82
   8   7  12    0.53    0.80
  -7   8 -13    9.11    1.46
  -7   8 -14    2.18    1.00
  -8  -8   0  479.37    7.98
   8   8   0  494.11    8.05
  -8  -8  -1   67.20    2.41
   8  -8   1   66.98    2.11
   8   8   1   71.14    2.48
   8   8  -1   68.40    2.33
  -8  -8  -2  431.37    7.70
   8   8  -2  428.38    7.23
   8  -8   2  432.65    6.79
   8   8   2  432.55    7.68
   8   8  -3   36.73    1.66
   8  -8   3   35.75    1.46
  -8  -8  -3   35.91    1.88
   8   8   3   34.77    1.89
   8   8  -4  289.57    5.64
  -8  -8  -4  307.93    6.50
   8  -8   4  289.86    5.19
   8   8   4  293.38    6.37
  -8  -8  -5    6.39    0.93
   8  -8   5    4.74    0.60
  -8   8  -5    5.89    0.66
   8   8   5    5.52    0.61
   8   8   5    6.10    0.95
  -8   8  -6  309.11    5.77
   8   8   6  317.61    5.74
   8   8   6  318.17    7.24
   8  -8   6  324.77    5.89
  -8   8  -7    0.00    0.34
   8   8   7    0.36    0.31
   8   8   7    1.51    0.75
   8  -8   7    0.41    0.33
  -8   8  -8  122.23    3.51
   8   8   8  121.10    3.57
   8  -8   8  122.49    3.60
   8   8   8  127.66    4.65
  -8   8  -9    0.24    0.39
   8  -8   9   -0.73    0.56
   8   8   9    0.55    0.69
   8  -8  10   39.65    2.24
   8   8 -10   46.27    3.14
   8   8  10   52.06    3.39
   8   8 -11   -0.59    0.70
   8   8  11   -0.35    0.68
   8   8 -12   19.24    2.24
   8   8  12   13.69    1.93
  -8   8 -13    0.72    0.81
  -8   8 -14    8.72    1.56
  -8  -9   0    0.46    0.35
   8   9   0    0.54    0.38
   8   9  -1    2.83    0.56
   9  -8   1    2.01    0.48
  -8  -9  -1    2.17    0.48
   8   9   1    3.38    0.63
  -8  -9  -2   10.26    0.98
   8   9  -2   10.11    0.90
   9  -8   2    9.37    0.83
   8   9   2    9.62    1.00
   8   9  -3   75.40    2.45
   9  -8   3   73.41    2.30
  -8  -9  -3   80.65    2.91
   8   9   3   68.26    2.60
   8   9  -4   24.44    1.39
   9  -8   4   24.48    1.31
  -8  -9  -4   26.39    1.72
   8   9   4   23.28    1.63
   8   9  -5   10.13    0.93
   9  -8   5    8.67    0.83
   8   9   5   11.08    1.23
   9  -8   6    7.50    0.84
  -9   8  -6    7.11    0.82
   8   9   6    7.41    0.77
   8   9   6    9.34    1.17
  -9   8  -7    0.25    0.33
   8   9   7    0.21    0.29
   8   9   7    0.71    0.66
   9  -8   7    0.00    0.38
  -9   8  -8    9.75    1.00
   8   9   8   10.07    1.05
   8   9   8   11.81    1.44
   9  -8   8   10.10    1.03
  -9   8  -9    2.45    0.53
   9  -8   9    2.01    0.62
   8   9   9    0.95    0.58
   9  -8  10    7.07    1.03
   8   9  10    8.02    1.48
   8   9 -11   -0.23    0.76
   8   9  11    0.29    0.65
   9  -8  11   -0.24    0.60
   8   9 -12    5.71    1.40
   8   9  12    4.53    1.22
  -9   8 -13    0.65    0.71
  -7  -9   0    8.17    0.78
   7   9   0    9.23    0.83
  -7  -9  -1    2.40    0.52
   9  -7   1    2.43    0.51
   7   9  -1    2.63    0.48
   7   9   1    1.69    0.43
   9  -7   2   52.83    1.93
  -7  -9  -2   52.69    2.16
   7   9  -2   50.51    1.86
   7   9   2   56.30    2.26
   7   9  -3    2.86    0.48
  -7  -9  -3    2.71    0.60
   9  -7   3    2.99    0.48
   7   9   3    1.92    0.55
   7   9  -4   20.51    1.18
   9  -7   4   19.64    1.20
  -7  -9  -4   22.02    1.53
   7   9   4   19.87    1.47
   9  -7   5   18.10    1.19
  -7  -9  -5   19.12    1.45
  -9   7  -5   15.58    1.11
   7   9  -5   16.02    1.13
  -9   7   5   17.48    1.46
   7   9   5   17.42    1.47
   9  -7   6    0.22    0.38
  -9   7  -6    0.27    0.30
   7   9   6    0.45    0.35
   7   9   6    0.86    0.46
  -9   7  -7   21.31    1.41
   7   9   7   19.90    1.37
   9  -7   7   21.40    1.45
   7   9   7   21.57    1.84
  -9   7  -8    1.36    0.43
   7   9   8    0.36    0.37
   9  -7   8    0.92    0.49
   7   9   8   -0.69    0.68
  -9   7  -9    0.65    0.46
   7   9   9   -0.48    0.42
   9  -7   9   -0.07    0.44
   7   9   9   -0.47    0.68
   7   9  10   15.13    1.83
   9  -7  10   14.87    1.53
   7   9 -11   10.16    1.63
   7   9  11    9.92    1.53
   9  -7  11   10.17    1.32
   7   9 -12    1.05    0.82
  -9   7 -13    5.76    1.28
  -6  -9   0    0.14    0.24
   6   9   0   -0.24    0.33
  -6  -9  -1  665.67    9.91
   9  -6   1  659.80    9.88
   6   9   1  673.51    9.99
   6   9  -1  670.63    9.56
   9  -6   2   -0.24    0.27
  -6  -9  -2    0.73    0.27
   6   9  -2    0.05    0.28
   6   9   2    0.03    0.36
   6   9  -3   32.04    1.37
   9  -6   3   31.16    1.49
  -6  -9  -3   32.24    1.69
   6   9   3   34.49    1.80
   9  -6   4   69.29    2.33
  -6  -9  -4   71.98    2.74
  -9   6  -4   69.28    2.37
   6   9  -4   70.78    2.16
  -9   6   4   70.02    2.73
   6   9   4   69.91    2.72
  -6  -9  -5  389.06    7.68
   9  -6   5  367.01    6.69
  -9   6  -5  370.45    6.71
  -9   6   5  393.38    7.73
   6   9   5  368.02    7.56
   9  -6   6   -0.03    0.36
  -9   6  -6   -0.19    0.28
   6   9   6    0.21    0.29
   6   9   6    0.53    0.51
  -9   6  -7   64.67    2.52
   6   9   7   61.58    2.46
   9  -6   7   63.70    2.53
   6   9   7   63.01    3.06
  -9   6  -8    0.06    0.41
   6   9   8   -0.07    0.39
   6   9   8   -0.38    0.62
   9  -6   8   -0.26    0.46
  -9   6  -9   40.35    2.20
   6   9   9   43.18    2.78
   6   9   9   38.19    2.19
   9  -6   9   37.11    2.15
   9  -6  10    3.73    0.79
   6   9  10    4.33    1.01
   9  -6  11   31.93    2.24
  -9   6 -12    1.40    0.81
   6   9 -12   -0.74    0.69
  -9   6 -13    7.39    1.29
  -5  -9   0  546.72    8.08
   5   9   0  552.39    8.14
   9  -5   1    1.23    0.39
  -5  -9   1    2.13    0.39
  -5  -9  -1    1.58    0.37
   5   9  -1    1.52    0.33
   5   9   1    1.44    0.38
   9  -5   2  215.94    4.45
  -5  -9  -2  215.05    4.52
   5   9  -2  221.62    3.98
   5   9   2  213.36    4.57
   5   9  -3   30.22    1.22
  -5  -9  -3   30.95    1.62
   9  -5   3   29.65    1.47
   5   9   3   30.94    1.64
   9  -5   4   57.94    2.15
  -5  -9  -4   57.95    2.39
  -9   5  -4   61.05    2.21
   5   9  -4   59.68    1.81
  -9   5   4   63.27    2.51
   5   9   4   57.07    2.42
   9  -5   5    0.34    0.34
  -5  -9  -5    0.01    0.30
  -9   5  -5   -0.04    0.36
  -9   5   5    0.15    0.34
   5   9   5    1.10    0.64
  -5  -9  -6  221.19    5.58
  -9   5  -6  215.51    4.88
  -9   5   6  221.03    5.64
   9  -5   6  209.10    4.80
   5   9   6  212.02    5.58
  -9   5  -7    0.60    0.42
   5   9   7    0.70    0.42
   5   9   7    0.13    0.48
   9  -5   7    1.02    0.47
  -9   5  -8    2.08    0.55
   5   9   8    1.58    0.57
   5   9   8    0.98    0.61
   9  -5   8    1.50    0.65
   5   9   9    0.27    0.55
   5   9  -9    0.05    0.38
   9  -5   9    0.92    0.51
   5   9 -10   40.67    2.39
   9  -5  10   34.76    2.27
  -9   5 -11    2.07    0.76
   9  -5  11    2.82    0.88
  -9   5 -12    6.95    1.22
   5   9 -12    9.99    1.66
   9  -5  12    7.94    1.25
  -9   5 -13   -0.54    0.70
  -4  -9   0    0.18    0.25
   9  -4   0   -0.03    0.34
   4   9   0   -0.07    0.24
  -4  -9   1   33.28    1.22
   9  -4   1   36.59    1.64
  -4  -9  -1   36.86    1.48
   4   9  -1   39.22    1.32
   4   9   1   38.78    1.54
   9  -4   2    8.15    0.78
   4   9  -2    6.67    0.53
  -4  -9  -2    7.11    0.72
   4   9   2    7.79    0.76
   9  -4   3  111.25    3.04
  -4  -9  -3  114.34    3.18
  -9   4  -3  107.33    3.03
   4   9  -3  111.70    2.35
  -9   4   3  114.33    3.21
   4   9   3  115.38    3.23
   9  -4   4    0.51    0.37
  -4  -9  -4    0.22    0.39
   4   9  -4    0.37    0.26
  -9   4  -4    0.42    0.32
  -9   4   4    0.45    0.35
   4   9   4    0.95    0.44
  -4  -9  -5   16.30    1.33
   9  -4   5   14.54    1.12
  -9   4  -5   16.60    1.18
  -9   4   5   14.76    1.27
   4   9   5   14.09    1.28
  -4  -9  -6    5.06    0.83
   9  -4   6    3.92    0.68
  -9   4  -6    4.13    0.63
  -9   4   6    3.56    0.77
   4   9   6    3.80    0.75
  -9   4  -7   27.64    1.69
   4   9   7   31.03    2.11
   4   9   7   25.90    1.63
   9  -4   7   24.99    1.63
  -9   4  -8   35.75    2.03
   4   9   8   37.95    2.44
   4   9  -8   36.17    1.82
   4   9   8   36.11    2.06
   9  -4   8   36.06    2.06
   9  -4   9    7.87    1.09
   4   9  -9    9.20    1.05
  -9   4 -10    8.18    1.12
   4   9 -10    5.70    0.82
   9  -4  10    8.13    1.10
  -9   4 -11    1.44    0.59
   9  -4  11    0.64    0.56
   9  -4  12   24.24    2.13
  -9   4 -12   27.61    2.16
  -9   4 -13    2.13    0.86
   9  -3   0   11.72    0.94
  -3  -9   0   11.73    0.71
   3   9   0   11.23    0.71
  -3  -9   1   17.75    0.79
   9  -3   1   17.31    1.12
  -3  -9  -1   17.66    0.96
   3   9  -1   19.59    0.84
   3   9   1   18.59    1.01
   3   9  -2   11.45    0.60
  -3  -9  -2   13.24    0.92
   9  -3   2   11.71    0.95
  -9   3   2   12.50    0.92
   3   9   2   12.69    0.92
  -3  -9  -3    0.93    0.33
  -9   3  -3    1.91    0.48
   3   9  -3    0.99    0.21
   9  -3   3    1.45    0.45
  -9   3   3    1.30    0.36
   3   9   3    1.26    0.41
  -3  -9  -4    0.31    0.36
   9  -3   4   -0.21    0.35
  -9   3  -4    0.25    0.28
   3   9  -4    0.37    0.21
  -9   3   4    0.46    0.32
   3   9   4    0.53    0.37
   9  -3   5   34.29    1.76
  -9   3  -5   34.37    1.74
   3   9   5   36.51    2.08
  -9   3   5   34.84    1.92
  -3  -9  -5   32.23    1.81
  -3  -9  -6    6.07    0.86
   9  -3   6    3.98    0.65
  -9   3  -6    6.11    0.81
  -9   3   6    5.04    0.80
   3   9   6    5.63    0.90
  -9   3  -7    7.22    0.86
   3   9   7    6.93    0.89
   3   9  -7    7.41    0.74
   9  -3   7    8.07    0.96
   3   9   7    5.37    0.98
  -9   3  -8   10.08    1.12
   3   9   8   12.48    1.22
   3   9  -8   11.63    0.99
   9  -3   8   11.47    1.21
  -9   3  -9   11.48    1.19
   3   9  -9   11.33    1.07
   9  -3   9   11.23    1.25
  -9   3 -10   13.67    1.35
   9  -3  10   13.05    1.43
   3   9 -10   12.57    1.18
  -9   3 -11   10.52    1.31
   9  -3  11   12.24    1.51
  -9   3 -12   -0.19    0.53
   9  -3  12   -0.11    0.67
  -9   3 -13    2.88    0.91
   9  -2   0   -0.10    0.33
  -2  -9   0    0.11    0.17
   2   9   0    0.24    0.24
  -2  -9  -1 1344.05   16.72
  -2  -9   1 1333.03   15.90
   9  -2   1 1371.52   17.65
  -9   2   1 1332.81   16.80
   2   9  -1 1332.00   15.96
   2   9  -2    5.35    0.34
  -2  -9  -2    5.43    0.59
   9  -2   2    5.39    0.68
  -9   2  -2    5.26    0.68
  -9   2   2    3.90    0.51
   2   9   2    4.45    0.58
   2   9  -3 1020.01   12.05
   9  -2   3  999.75   14.10
  -9   2  -3 1031.44   14.22
  -9   2   3 1009.00   14.08
   2   9   3 1064.61   14.36
  -2  -9  -3  994.83   13.91
   9  -2   4   27.51    1.53
  -9   2  -4   24.19    1.42
   2   9  -4   26.64    0.83
   2   9   4   27.86    1.61
  -9   2   4   28.71    1.63
  -2  -9  -4   26.15    1.51
   9  -2   5   54.30    2.26
  -9   2  -5   59.13    2.34
   2   9  -5   55.96    1.53
   2   9   5   54.91    2.45
  -9   2   5   58.53    2.50
  -2  -9  -5   57.04    2.43
  -2  -9  -6   15.63    1.19
  -9   2  -6   16.32    1.29
   2   9  -6   19.27    1.02
   2   9   6   15.86    1.40
   9  -2   6   15.39    1.24
  -9   2  -7  210.79    5.23
   2   9   7  201.13    5.07
   2   9  -7  197.56    4.05
   9  -2   7  202.79    5.12
   2   9   8   20.26    1.58
  -9   2  -8   20.16    1.39
   9  -2   8   20.46    1.62
   2   9  -8   19.42    1.18
  -9   2  -9   44.74    2.21
   9  -2   9   43.75    2.48
   2   9  -9   44.32    1.98
  -9   2 -10    7.42    0.98
   9  -2  10    7.33    1.13
   2   9 -10    6.22    0.83
  -9   2 -11   17.57    1.57
   9  -2  11   18.07    1.90
  -9   2 -12    3.08    0.86
   9  -2  12    1.91    0.94
  -9   2 -13   12.58    1.47
   2   9 -13   15.10    2.04
  -1  -9   0  419.14    5.93
   9  -1   0  427.33    7.22
  -9   1   0  408.66    6.01
   1   9   0  470.92    6.34
  -1  -9  -1    4.18    0.46
  -1  -9   1    4.38    0.31
   9  -1   1    4.64    0.63
  -9   1   1    4.74    0.49
   1   9  -1    4.36    0.33
   1   9   1    3.67    0.46
   9  -1   2  173.24    3.99
  -9   1  -2  178.65    4.07
   1   9   2  168.88    3.65
  -9   1   2  174.29    3.70
  -1  -9  -2  171.84    3.61
   9  -1   3    3.59    0.57
  -1  -9  -3    4.30    0.62
  -9   1  -3    3.11    0.56
  -9   1   3    2.47    0.46
   1   9   3    3.95    0.56
   9  -1   4   34.38    1.71
  -9   1  -4   33.52    1.70
   1   9  -4   33.94    0.77
   1   9   4   32.91    1.74
  -9   1   4   35.00    1.77
   1   9  -4   32.40    0.79
  -1  -9  -4   36.75    1.78
  -9   1  -5   22.92    1.48
   9  -1   5   19.61    1.37
  -1  -9  -5   21.76    1.46
   1   9  -5   20.30    0.78
  -9   1  -6  174.95    4.56
  -9   1  -6  177.31    3.64
  -1  -9  -6  178.35    4.81
   1   9  -6  168.90    3.20
   9  -1   6  169.21    4.44
  -9   1  -7   13.82    1.28
   1   9   7   13.40    1.23
  -9   1  -7   12.72    0.99
   1   9  -7   13.30    0.86
   9  -1   7   12.48    1.22
  -9   1  -8   -0.06    0.35
   1   9  -8    0.34    0.27
   9  -1   8    0.25    0.49
  -9   1  -9    7.32    0.88
   1   9  -9    7.22    0.83
   9  -1   9    8.49    1.13
  -9   1 -10   10.09    1.11
   9  -1  10    9.29    1.21
   1   9 -10    9.65    0.99
  -9   1 -11    0.48    0.41
   9  -1  11   -0.56    0.66
  -9   1 -12    7.18    1.12
   9  -1  12    7.56    1.31
  -9   1 -13    3.43    0.85
   1   9 -13    5.96    1.28
   0  -9   0    0.26    0.18
   9   0   0    1.27    0.47
  -9   0   0    0.34    0.17
   0  -9   1  180.16    2.53
   9   0  -1  178.93    4.12
   9   0   1  176.72    4.03
  -9   0  -1  176.45    2.66
  -9   0   1  175.00    3.38
   0  -9  -1  184.02    3.38
  -9   0  -2   14.02    1.05
   9   0   2   13.07    1.03
   0  -9  -2   14.49    0.92
  -9   0  -3    8.96    0.87
   9   0   3    7.83    0.81
   0  -9  -3    9.26    0.85
   9   0   4   30.94    1.66
  -9   0  -4   33.37    1.71
   9   0  -4   30.20    1.59
  -9   0  -4   29.57    0.88
   0  -9  -4   31.49    1.66
   0   9  -5    1.24    0.20
   9   0   5    0.62    0.38
  -9   0  -5    1.41    0.41
   9   0  -5    1.19    0.49
  -9   0  -5    1.36    0.27
   0  -9  -5    1.05    0.45
  -9   0  -6   53.87    2.42
   9   0  -6   50.65    2.42
  -9   0  -6   50.38    1.64
   0  -9  -6   51.76    2.48
   0   9  -6   48.18    1.40
   9   0   6   48.55    2.28
  -9   0  -7   51.75    2.48
   0   9   7   48.46    2.38
   9   0  -7   49.11    2.51
  -9   0  -7   50.89    1.84
   9   0   7   50.74    2.47
   0   9  -7   49.40    1.65
   9   0  -8   12.48    1.42
  -9   0  -8   12.13    0.99
   0   9  -8   12.27    0.90
   9   0   8   12.21    1.32
   0   9  -9    5.47    0.69
   9   0  -9    4.59    0.94
  -9   0  -9    5.79    0.81
   9   0   9    4.72    0.89
   0   9 -10    0.40    0.39
   9   0 -10    1.35    0.74
  -9   0 -10    2.06    0.57
   9   0  10    1.32    0.74
  -9   0 -11    0.51    0.48
   9   0 -11   -0.04    0.61
   9   0  11   -0.29    0.70
   9   0  12   47.26    3.04
   9   0  13    3.50    1.04
   9   1   0   26.00    1.39
   1  -9   0   24.55    0.88
   9   1  -1    5.29    0.68
   9   1   1    4.92    0.67
  -9  -1  -1    6.01    0.71
   1  -9   1    4.26    0.25
   1  -9  -1    4.23    0.46
   9   1   2   40.97    1.83
  -9  -1  -2   42.15    1.84
   9   1  -2   39.82    1.51
   1  -9  -2   40.64    1.57
   9   1   3   18.45    1.26
  -9  -1  -3   19.75    1.32
   9   1  -3   19.50    1.18
   1  -9  -3   18.16    1.16
   9   1   4    9.69    0.98
  -9  -1  -4   10.99    1.03
   9   1  -4   11.21    0.99
   1  -9  -4    9.06    0.90
  -1   9  -5    0.07    0.11
   9   1   5   -0.18    0.38
  -9  -1  -5    0.63    0.40
   9   1  -5    0.16    0.33
   1  -9  -5    0.46    0.33
  -9  -1  -6   50.47    2.38
  -1   9  -6   46.58    1.34
  -9  -1  -6   47.02    1.51
   9   1  -6   51.59    2.43
   9   1   6   46.65    2.27
   1  -9  -6   50.89    2.46
  -1   9  -7   43.32    1.50
  -9  -1  -7   43.37    1.64
  -1   9   7   45.73    2.33
   9   1  -7   44.83    2.42
   9   1   7   46.31    2.39
   9   1  -8   13.54    1.43
  -9  -1  -8   13.74    1.02
   9   1   8   13.91    1.38
  -1   9  -8   13.14    0.93
  -1   9  -9    0.08    0.30
   9   1  -9   -0.57    0.68
  -9  -1  -9    0.67    0.43
   9   1   9   -0.24    0.46
  -1   9 -10    8.61    0.93
   9   1 -10   10.47    1.45
   9   1  10    6.75    1.17
   9   1 -11    2.40    0.82
   9   1  11    1.40    0.70
   9   1 -12    1.60    0.89
   9   1  12    0.07    0.60
   9   1 -13    0.77    0.74
   9   1  13    2.35    1.08
   9   2   0   -0.84    0.39
   2  -9   0   -0.17    0.18
   9   2  -1  930.53   13.07
  -9  -2  -1  935.55   13.14
   9   2   1  929.52   13.05
   2  -9  -1  904.72   12.01
   9   2  -1  922.81   11.79
   2  -9   1  912.37   10.86
   9   2   2   47.28    1.99
   9   2  -2   46.65    1.66
   2  -9  -2   46.89    1.75
  -9  -2  -2   51.38    2.07
   9   2   3  418.67    7.47
  -9  -2  -3  427.33    7.52
   9   2  -3  421.82    7.05
   2  -9  -3  415.44    7.18
   9   2   4    7.80    0.89
  -9  -2  -4   10.09    0.98
   9   2  -4    9.07    0.90
   2  -9  -4    7.36    0.85
  -9  -2  -5  267.89    5.86
  -2   9  -5  258.36    3.62
   9   2  -5  259.72    5.75
   9   2   5  256.30    5.77
   2  -9  -5  266.35    5.95
   9   2   6    0.21    0.39
  -2   9  -6    0.25    0.17
  -9  -2  -6    0.19    0.34
   9   2  -6    0.39    0.38
   2  -9  -6    0.51    0.38
  -2   9  -7  446.50    6.70
   9   2  -7  458.28    9.02
   9   2   7  442.34    8.75
  -2   9  -8    0.17    0.25
   9   2  -8    0.24    0.52
   9   2   8    0.79    0.48
  -2   9  -9   42.79    1.84
   9   2  -9   49.26    2.87
   9   2   9   45.51    2.66
  -2   9 -10    8.31    0.87
   9   2 -10   10.70    1.54
   9   2  10   10.42    1.47
   9   2 -11   30.97    2.58
   9   2  11   28.03    2.45
   9   2 -12    2.42    0.93
   9   2  12    2.18    0.90
   9   2 -13   24.46    2.48
   9   2  13   21.91    2.28
   9   3   0    6.83    0.46
   9   3   0    7.39    0.80
   9   3  -1    9.15    0.66
  -9  -3  -1    8.49    0.85
   9   3  -1    9.17    0.89
   9   3   1    8.40    0.87
   9   3   2   41.51    1.88
   9   3  -2   36.99    1.79
  -9  -3  -2   38.12    1.79
   3  -9  -2   39.29    1.63
   9   3  -2   37.98    1.53
   9   3   3    1.17    0.48
  -9  -3  -3    0.90    0.44
   9   3  -3    0.92    0.39
   3  -9  -3    1.12    0.39
   9   3   4   75.66    2.79
  -9  -3  -4   83.77    2.92
   3  -9  -4   81.45    2.84
   9   3  -4   77.98    2.73
   9   3   5    4.52    0.79
  -9  -3  -5    3.48    0.65
  -3   9  -5    3.88    0.32
   9   3  -5    4.95    0.77
   3  -9  -5    5.75    0.89
   9   3   6    7.81    1.02
  -3   9  -6    7.24    0.53
  -9  -3  -6    5.52    0.83
   9   3  -6    7.39    0.96
   3  -9  -6    7.63    1.06
  -3   9  -7   89.98    2.29
   9   3  -7  102.90    3.77
   9   3   7   94.67    3.60
  -3   9  -8   30.60    1.39
   9   3  -8   31.92    2.24
   9   3   8   28.24    2.05
  -3   9  -9   31.45    1.56
   9   3  -9   34.12    2.43
   9   3   9   35.49    2.38
  -3   9 -10   19.55    1.35
   9   3 -10   21.45    2.04
   9   3  10   21.64    1.98
   9   3 -11    2.14    0.83
   9   3  11    4.93    1.12
   9   3 -12    4.16    1.21
   9   3  12    2.34    0.98
   9   3  13    1.58    0.92
   9   4   0    0.13    0.40
  -9  -4  -1  119.88    3.30
   9   4  -1  114.46    3.18
   9   4   1  118.76    3.31
   9   4  -2   21.75    1.33
  -9  -4  -2   22.37    1.38
   4  -9   2   21.07    0.69
   9   4   2   21.03    1.35
  -9  -4  -3   16.17    1.22
   9   4   3   15.72    1.22
   4  -9   3   15.04    0.54
  -9  -4  -4   27.62    1.66
   9   4   4   28.12    1.70
   4  -9  -4   27.33    1.64
   9   4  -4   28.21    1.63
   4  -9   4   27.72    0.85
   9   4   5   10.22    1.08
  -9  -4  -5   11.77    1.17
  -4   9  -5   10.16    0.56
   4  -9   5   10.05    0.60
   9   4  -5   10.07    1.06
   4  -9  -5   10.99    1.14
  -9  -4  -6  268.11    6.29
  -4   9  -6  261.84    4.34
   4  -9  -6  287.97    6.64
   9   4  -6  276.89    6.42
   9   4   6  266.50    6.27
  -4   9  -7   61.53    1.88
   9   4  -7   60.51    2.94
   9   4   7   60.88    2.87
  -4   9  -8    4.73    0.57
   9   4  -8    4.16    0.90
   9   4   8    5.27    1.01
  -4   9  -9   -0.02    0.27
   9   4  -9    0.04    0.57
   9   4   9    0.25    0.63
  -4   9 -10    5.62    0.81
   9   4 -10    4.98    1.09
   9   4  10    4.51    1.03
   9   4 -11    4.99    1.15
   9   4  11    7.10    1.42
   9   4 -12   20.75    2.24
   9   4  12   24.59    2.34
   9   4  13    2.16    1.03
   9   5   0  129.29    3.44
   9   5   1   82.11    2.70
  -9  -5  -1   84.58    2.74
   9   5  -1   78.27    2.59
   9   5   2   28.51    1.60
   5  -9   2   28.88    0.97
   9   5  -2   30.18    1.57
  -9  -5  -2   29.58    1.62
   9   5   3   64.75    2.53
   5  -9   3   62.81    1.46
   9   5  -3   66.30    2.42
  -9  -5  -3   63.29    2.52
   9   5   3   62.00    1.22
   9   5   4  198.86    4.94
  -9  -5  -4  211.71    5.07
   5  -9   4  200.89    3.32
  -5   9  -5   14.90    0.75
  -9  -5  -5   14.09    1.27
   5  -9   5   13.91    0.75
   9   5   5   14.40    1.28
  -5   9  -6  116.44    2.58
   5  -9   6  116.33    2.72
   5  -9  -6  120.56    4.12
   9   5  -6  119.38    4.02
   9   5   6  115.36    3.97
  -5   9  -7   18.81    1.05
   9   5  -7   20.37    1.72
   9   5   7   16.89    1.58
  -5   9  -8    1.78    0.40
   9   5  -8    2.00    0.73
   9   5   8    2.79    0.89
  -5   9  -9    4.20    0.64
   9   5  -9    4.87    1.09
   9   5   9    3.18    0.88
  -5   9 -10   29.96    1.71
   9   5 -10   33.00    2.56
   9   5  10   28.28    2.36
   9   5 -11    1.57    0.98
   9   5  11    0.35    0.79
   9   5 -12   14.53    1.86
   9   5  12   10.35    1.63
  -9  -6   0    0.03    0.27
   9   6   0   -0.09    0.36
   9   6   1  568.82    9.25
  -9  -6  -1  580.31    9.30
   9   6  -1  559.82    9.06
   9   6   2   43.73    2.01
  -9  -6  -2   42.16    1.97
   6  -9   2   40.96    1.31
   9   6  -2   41.87    1.87
   9   6   3  385.37    7.42
   6  -9   3  397.69    5.76
   9   6  -3  396.22    7.12
  -9  -6  -3  410.65    7.57
   9   6   4    0.36    0.43
   6  -9   4    0.46    0.19
  -9  -6  -4    0.73    0.41
   9   6   4    0.43    0.18
  -9  -6  -5  415.11    8.13
   9   6   5  397.68    5.96
   6  -9   5  405.33    6.14
   9   6   5  392.96    7.95
  -6   9  -6   93.12    2.39
   6  -9   6   92.96    2.44
   9   6   6   87.78    3.45
  -6   9  -7  149.03    3.40
   6  -9   7  159.53    3.68
   9   6  -7  157.19    5.00
   9   6   7  153.01    4.87
  -6   9  -8    8.41    0.80
   9   6  -8    7.96    1.23
   6  -9   8    8.50    0.86
   9   6   8    8.21    1.22
  -6   9  -9   62.75    2.37
   9   6  -9   67.13    3.55
   9   6   9   68.60    3.46
   9   6 -10    0.29    0.59
   9   6  10   -0.41    0.73
   9   6 -11   36.46    2.82
   9   6  11   33.01    2.77
   9   6 -12    5.98    1.29
   9   6  12    9.08    1.59
  -9  -7   0  104.62    3.14
   9   7   0  103.31    3.10
   7  -9   1   75.35    2.11
   9   7  -1   76.68    2.57
  -9  -7  -1   72.47    2.60
   9   7   1   71.19    2.57
   7  -9   2   21.63    1.02
  -9  -7  -2   24.65    1.52
   9   7  -2   23.04    1.37
   9   7   2   22.27    1.46
   9   7  -3    6.25    0.78
  -9  -7  -3    6.43    0.84
   9   7   3    8.95    1.01
   7  -9   3    7.65    0.62
   9   7  -4   11.72    1.04
  -9  -7  -4   13.75    1.23
   7  -9   4   12.32    0.78
   9   7   4   12.69    1.20
   9   7   5   21.41    1.03
   7  -9   5   21.05    1.09
   9   7   5   19.60    1.58
  -7   9  -6    1.73    0.38
   9   7   6    1.80    0.36
   9   7   6    2.11    0.68
   7  -9   6    1.27    0.34
  -7   9  -7    2.56    0.48
   7  -9   7    2.17    0.52
   9   7   7    3.08    0.85
  -7   9  -8   -0.41    0.36
   9   7   8   -0.47    0.64
   7  -9   8    0.05    0.32
  -7   9  -9    1.72    0.42
   9   7  -9    2.05    0.80
   9   7   9    1.98    0.79
   7  -9   9    1.92    0.57
   9   7 -10    3.56    1.01
   9   7  10    2.33    0.84
   9   7 -11    1.77    0.91
   9   7  11    6.08    1.36
   9   7 -12   -0.47    0.86
   9   7  12    0.45    0.78
  -9  -8   0   -0.24    0.33
   9   8   0   -0.14    0.37
   8  -9   1    0.29    0.28
  -9  -8  -1   -0.16    0.28
   9   8  -1    0.22    0.35
   9   8   1    0.23    0.38
   9   8  -2    0.70    0.40
  -9  -8  -2    0.03    0.33
   8  -9   2    0.39    0.27
   9   8   2    0.71    0.43
   9   8  -3    5.52    0.72
   8  -9   3    4.28    0.53
  -9  -8  -3    6.46    0.87
   9   8   3    5.00    0.81
   9   8  -4   30.68    1.64
   8  -9   4   30.21    1.34
  -9  -8  -4   31.80    1.91
   9   8   4   29.46    1.81
   8  -9   5    1.01    0.35
   9   8   5    0.99    0.59
   9   8   5    1.63    0.37
  -8   9  -6   16.95    1.09
   9   8   6   18.31    1.09
   8  -9   6   17.89    1.15
   9   8   6   21.87    1.76
  -8   9  -7   37.12    1.70
   9   8   7   39.97    1.77
   8  -9   7   41.33    1.82
   9   8   7   42.25    2.53
  -8   9  -8    7.00    0.79
   9   8   8    8.37    1.27
   8  -9   8    7.25    0.84
  -8   9  -9   16.24    1.27
   8  -9   9   20.66    1.46
   9   8   9   16.84    1.84
   9   8 -10   18.57    2.05
   9   8  10   20.06    2.06
   9   8 -11    1.91    1.00
   9   8  11   -0.90    0.65
   9   8 -12   18.69    2.23
   9   8  12   16.04    2.02
  -9  -9   0  594.30    9.58
   9   9   0  580.15    9.49
   9  -9   1   12.32    0.94
   9   9  -1    9.74    0.93
  -9  -9  -1   10.31    1.00
   9   9   1   10.91    1.04
   9  -9   2  123.67    3.08
   9   9  -2  125.39    3.42
  -9  -9  -2  122.61    3.65
   9   9   2  120.40    3.64
  -9  -9  -3    9.14    1.00
   9   9  -3    8.60    0.87
   9  -9   3    9.15    0.80
   9   9   3    8.72    1.03
   9   9  -4   80.99    2.74
  -9  -9  -4   78.48    3.11
   9  -9   4   81.72    2.42
   9   9   4   81.69    3.18
   9   9  -5   12.42    1.08
   9  -9   5   10.09    0.88
   9   9   5    9.65    1.19
   9   9   6  104.47    2.90
   9  -9   6  111.74    3.10
   9   9   6  109.34    4.07
  -9   9  -7    1.41    0.43
   9   9   7    1.17    0.37
   9  -9   7    0.88    0.38
   9   9   7    1.27    0.71
  -9   9  -8   23.28    1.47
   9   9   8   22.29    1.47
   9  -9   8   21.61    1.47
   9   9   8   24.41    2.06
  -9   9  -9    3.62    0.68
   9   9   9    5.75    1.19
   9  -9   9    5.83    0.86
   9  -9  10   22.16    1.70
   9   9 -10   22.18    2.20
   9   9  10   18.90    2.06
   9   9 -11    0.01    0.77
   9   9  11    2.80    1.13
  -9 -10   0   -0.03    0.34
   9  10   0    0.34    0.37
  -9 -10  -1  511.59    8.87
  10  -9   1  503.47    8.30
   9  10   1  508.03    8.80
   9  10  -1  510.95    8.56
  -9 -10  -2   62.14    2.56
  10  -9   2   58.71    2.16
   9  10  -2   63.07    2.35
   9  10   2   61.33    2.56
   9  10  -3  158.27    3.94
  -9 -10  -3  163.02    4.49
  10  -9   3  154.90    3.73
   9  10   3  142.45    4.16
   9  10  -4   -0.08    0.33
  10  -9   4    0.75    0.39
   9  10   4    0.05    0.42
   9  10  -5   80.13    2.77
  10  -9   5   84.83    2.68
   9  10   5   81.68    3.40
  10  -9   6    8.96    0.92
   9  10  -6    8.29    0.96
   9  10   6    8.59    0.85
   9  10   6    9.56    1.22
 -10   9  -7  121.23    3.54
   9  10   7  121.20    3.45
  10  -9   7  132.50    3.69
   9  10   7  127.95    4.67
 -10   9  -8    1.22    0.44
   9  10   8    0.08    0.43
   9  10   8   -1.21    0.78
  10  -9   8   -0.28    0.35
  10  -9   9   71.73    2.96
   9  10   9   73.32    3.84
  10  -9  10    0.56    0.47
   9  10  10    1.71    1.03
   9  10 -11    5.92    1.33
   9  10  11    5.19    1.21
  -8 -10   0   32.40    1.65
   8  10   0   32.78    1.66
  -8 -10  -1    2.66    0.55
  10  -8   1    2.33    0.49
   8  10   1    2.92    0.58
   8  10  -1    2.66    0.54
   8  10  -2    0.31    0.27
  10  -8   2    0.39    0.32
  -8 -10  -2    0.37    0.33
   8  10   2    0.74    0.39
   8  10  -3    7.95    0.80
  10  -8   3    7.54    0.80
  -8 -10  -3    8.24    0.96
   8  10   3    7.23    0.90
  -8 -10  -4    7.27    0.97
   8  10  -4    5.58    0.71
  10  -8   4    5.63    0.70
   8  10   4    5.47    0.82
   8  10  -5   28.21    1.53
  10  -8   5   28.18    1.51
   8  10   5   28.95    1.97
  10  -8   6    7.65    0.80
   8  10  -6    7.47    0.87
 -10   8  -6    7.90    0.87
   8  10   6    7.46    0.81
   8  10   6    8.31    1.13
 -10   8  -7   20.26    1.40
   8  10   7   20.17    1.39
   8  10   7   21.41    1.86
  10  -8   7   21.28    1.45
 -10   8  -8   27.50    1.70
   8  10   8   27.43    1.70
   8  10   8   32.06    2.39
  10  -8   8   28.37    1.77
   8  10   9   18.92    1.56
  10  -8   9   20.58    1.61
   8  10   9   18.19    1.94
   8  10  10    3.56    0.97
  10  -8  10    0.72    0.57
   8  10  11   13.31    1.83
  10  -8  11   13.35    1.43
 -10   8 -13    4.17    1.15
  -7 -10   0    0.14    0.30
   7  10   0   -0.10    0.28
  10  -7   1    8.06    0.82
  -7 -10  -1    8.44    0.86
   7  10   1    9.51    0.92
   7  10  -1    8.70    0.78
  10  -7   2   19.25    1.22
  -7 -10  -2   21.11    1.38
   7  10  -2   19.92    1.16
   7  10   2   19.93    1.31
  10  -7   3    1.15    0.43
   7  10  -3    1.12    0.35
  -7 -10  -3    1.40    0.49
   7  10   3    0.64    0.45
   7  10  -4    1.00    0.39
  -7 -10  -4    0.36    0.39
  10  -7   4    0.43    0.36
   7  10   4    0.05    0.38
 -10   7  -5    0.20    0.30
   7  10  -5   -0.29    0.28
  -7 -10  -5   -0.18    0.39
  10  -7   5    0.18    0.38
   7  10   5    0.78    0.52
 -10   7  -6   55.31    2.30
  10  -7   6   56.79    2.29
   7  10   6   59.04    2.90
 -10   7  -7   24.70    1.58
   7  10   7   25.77    1.59
   7  10   7   27.91    2.08
  10  -7   7   24.65    1.59
 -10   7  -8    0.11    0.40
   7  10   8    0.63    0.41
  10  -7   8    1.44    0.55
   7  10   8    0.24    0.58
   7  10   9    6.22    0.96
   7  10   9    6.35    1.17
  10  -7   9    6.27    0.98
   7  10  10   11.16    1.56
  10  -7  10   10.71    1.28
   7  10  11    2.95    0.92
  10  -7  11    1.75    0.74
 -10   7 -12   19.05    1.90
  10  -7  12   17.57    1.78
 -10   7 -13    0.51    0.59
  -6 -10   0 1101.86   14.80
  10  -6   0 1097.43   15.40
   6  10   0 1132.68   14.89
  -6 -10  -1    3.58    0.57
  10  -6   1    3.95    0.61
   6  10   1    4.50    0.61
   6  10  -1    3.49    0.47
  10  -6   2  270.87    5.37
  -6 -10  -2  276.58    5.57
   6  10  -2  278.46    4.92
   6  10   2  272.30    5.56
   6  10  -3   36.82    1.46
  10  -6   3   39.08    1.77
  -6 -10  -3   37.04    1.86
   6  10   3   37.32    1.89
  -6 -10  -4  367.08    7.14
  10  -6   4  347.83    6.46
   6  10  -4  350.78    5.87
 -10   6   4  353.65    7.12
   6  10   4  350.59    7.11
  -6 -10  -5   24.17    1.69
  10  -6   5   25.13    1.49
 -10   6  -5   24.49    1.48
   6  10  -5   25.20    1.27
 -10   6   5   24.77    1.75
   6  10   5   24.46    1.73
 -10   6  -6  220.68    5.05
   6  10   6  213.14    5.70
  10  -6   6  201.99    4.80
 -10   6  -7   11.89    1.12
   6  10   7   12.41    1.13
   6  10   7   12.03    1.39
  10  -6   7   12.33    1.16
 -10   6  -8  100.89    3.50
   6  10   8  104.64    3.57
   6  10   8  113.62    4.58
  10  -6   8  107.08    3.65
   6  10   9    0.50    0.60
  10  -6   9    2.66    0.74
   6  10  10   29.39    2.49
  10  -6  10   26.26    1.93
  10  -6  11    0.14    0.53
  10  -6  12   25.84    2.14
 -10   6 -12   26.48    2.19
   6  10 -12   27.56    2.71
  10  -5   0   -0.26    0.32
  -5 -10   0    0.35    0.28
   5  10   0   -0.05    0.25
  -5 -10   1  523.89    7.74
  10  -5   1  525.82    8.57
   5  10  -1  527.67    7.77
  -5 -10  -1  534.43    8.22
   5  10   1  535.71    8.28
  10  -5   2    8.20    0.81
  -5 -10  -2    8.06    0.79
   5  10  -2    7.32    0.61
   5  10   2    7.94    0.81
  -5 -10  -3  166.20    4.15
  10  -5   3  170.30    4.06
   5  10  -3  174.87    3.37
 -10   5   3  170.68    4.26
   5  10   3  173.08    4.27
  10  -5   4   48.50    2.04
  -5 -10  -4   50.28    2.26
 -10   5  -4   47.39    2.05
   5  10  -4   46.96    1.56
 -10   5   4   50.09    2.27
   5  10   4   44.15    2.15
  10  -5   5  235.56    5.24
  -5 -10  -5  256.54    5.91
   5  10  -5  256.42    4.56
 -10   5  -5  249.46    5.40
 -10   5   5  252.44    5.94
   5  10   5  251.22    5.93
 -10   5  -6    1.91    0.50
  10  -5   6    2.69    0.59
   5  10   6    1.52    0.63
 -10   5  -7   34.34    1.92
   5  10   7   37.91    2.49
   5  10   7   33.55    1.89
  10  -5   7   37.41    2.01
 -10   5  -8   -0.02    0.39
   5  10   8    0.53    0.47
   5  10   8    1.12    0.68
  10  -5   8   -0.40    0.49
   5  10   9   73.46    3.66
   5  10  -9   70.69    2.74
  10  -5   9   66.75    3.03
  10  -5  10    5.92    1.02
 -10   5 -11    9.22    1.23
  10  -5  11    7.15    1.22
 -10   5 -12    0.01    0.53
  10  -5  12    0.36    0.65
  10  -4   0    5.92    0.77
  -4 -10   0    5.15    0.54
   4  10   0    5.89    0.61
  10  -4   1    7.35    0.82
  -4 -10  -1    7.42    0.69
  -4 -10   1    6.80    0.57
   4  10  -1    7.52    0.59
   4  10   1    6.77    0.66
   4  10  -2  141.17    2.79
  -4 -10  -2  147.80    3.50
  10  -4   2  145.22    3.65
 -10   4   2  139.30    3.51
   4  10   2  144.85    3.55
   4  10  -3   22.32    0.94
  10  -4   3   22.99    1.39
  -4 -10  -3   22.50    1.37
 -10   4   3   23.64    1.42
   4  10   3   22.86    1.40
  10  -4   4    8.32    0.89
  -4 -10  -4    8.40    0.92
   4  10  -4    9.52    0.62
 -10   4  -4    9.20    0.93
 -10   4   4    8.68    0.96
   4  10   4    7.52    0.92
  -4 -10  -5    4.52    0.78
  10  -4   5    3.02    0.56
 -10   4  -5    4.26    0.71
   4  10  -5    4.32    0.47
 -10   4   5    3.39    0.72
   4  10   5    3.07    0.68
  -4 -10  -6    0.83    0.40
  10  -4   6    0.43    0.38
 -10   4  -6    1.41    0.47
 -10   4   6    0.76    0.49
   4  10   6    0.85    0.47
  10  -4   7    5.53    0.86
 -10   4  -7    5.91    0.91
   4  10   7    6.43    0.87
   4  10   7    5.32    0.91
   4  10   8    1.33    0.47
   4  10   8    1.85    0.75
   4  10  -8    1.85    0.51
  10  -4   8    2.50    0.65
   4  10  -9   48.04    2.15
  10  -4   9   49.15    2.60
 -10   4 -10    1.26    0.67
  10  -4  10    1.04    0.59
 -10   4 -11   17.62    1.64
  10  -4  11   16.73    1.76
 -10   4 -12    0.42    0.66
  10  -4  12   -0.13    0.67
  -3 -10   0    0.58    0.25
  10  -3   0    0.03    0.35
   3  10   0   -0.15    0.24
  -3 -10   1   22.37    0.92
  10  -3   1   21.47    1.31
  -3 -10  -1   26.69    1.23
   3  10  -1   23.61    0.96
   3  10   1   26.40    1.25
   3  10  -2  108.21    2.13
  -3 -10  -2  109.93    2.90
  10  -3   2  112.28    3.17
 -10   3   2  108.82    2.95
   3  10   2  110.58    2.97
  10  -3   3   98.80    2.99
   3  10  -3   97.05    1.91
  -3 -10  -3   98.18    2.91
 -10   3  -3   91.06    2.93
 -10   3   3   97.21    2.96
   3  10   3   96.32    2.97
  10  -3   4   78.30    2.70
  -3 -10  -4   78.10    2.76
 -10   3  -4   82.38    2.78
   3  10  -4   80.24    1.73
   3  10   4   76.01    2.82
 -10   3   4   75.39    2.75
  10  -3   5   30.24    1.70
   3  10  -5   27.53    1.05
 -10   3  -5   30.48    1.71
   3  10   5   31.33    1.91
 -10   3   5   31.78    1.89
  -3 -10  -5   31.59    1.87
  -3 -10  -6    2.86    0.65
  10  -3   6    3.08    0.65
 -10   3  -6    2.21    0.48
 -10   3   6    3.83    0.80
   3  10  -6    2.86    0.40
   3  10   6    3.30    0.71
  10  -3   7    1.24    0.50
 -10   3  -7    2.78    0.63
   3  10   7    1.56    0.46
   3  10   7    2.11    0.71
   3  10  -7    1.87    0.40
   3  10  -8   12.51    0.96
  10  -3   8   12.10    1.28
 -10   3  -9    7.18    0.94
   3  10  -9    8.00    0.82
  10  -3   9    7.80    1.07
 -10   3 -10   20.36    1.61
  10  -3  10   21.46    1.86
 -10   3 -11    7.88    1.11
  10  -3  11    7.96    1.30
 -10   3 -12    7.90    1.15
  10  -3  12    5.46    1.09
  10  -3  13    2.71    0.97
  -2 -10   0 1217.43   14.99
  10  -2   0 1198.90   16.52
 -10   2   0 1214.07   15.16
  -2 -10  -1   14.03    0.84
  -2 -10   1   12.35    0.62
  10  -2   1   11.81    0.99
 -10   2   1   12.00    0.83
   2  10   1   11.95    0.83
   2  10  -1   13.72    0.66
  -2 -10  -2  956.05   12.88
  10  -2   2  956.18   13.53
   2  10   2  935.38   13.02
 -10   2   2  930.04   12.96
   2  10  -2  946.17   11.32
  -2 -10  -3    3.27    0.52
   2  10  -3    1.80    0.19
 -10   2  -3    1.58    0.45
  10  -2   3    2.10    0.55
 -10   2   3    2.82    0.56
   2  10   3    1.69    0.49
  10  -2   4  496.77    8.41
 -10   2  -4  493.33    8.43
   2  10  -4  488.04    6.08
   2  10   4  465.79    8.37
 -10   2   4  491.08    8.52
  -2 -10  -4  440.95    7.93
  10  -2   5    1.12    0.44
  -2 -10  -5    0.10    0.35
   2  10  -5    0.78    0.21
 -10   2  -5    1.32    0.43
 -10   2   5    1.53    0.41
   2  10   5    0.57    0.50
   2  10  -5    0.72    0.23
 -10   2  -6   84.05    3.06
  10  -2   6   77.92    2.94
   2  10  -6   80.85    2.00
  -2 -10  -6   81.61    3.21
  10  -2   7    5.79    0.88
 -10   2  -7    6.76    0.94
   2  10   7    6.36    0.89
   2  10  -7    5.36    0.55
 -10   2  -8  137.72    3.71
  10  -2   8  129.50    4.27
   2  10  -8  132.93    3.24
 -10   2  -9    2.33    0.58
   2  10  -9    1.46    0.44
  10  -2   9    2.51    0.75
 -10   2 -10   67.84    2.84
  10  -2  10   65.15    3.25
 -10   2 -11    0.41    0.52
  10  -2  11   -0.88    0.74
 -10   2 -12   14.85    1.50
  10  -2  12   15.47    1.75
  10  -2  13    0.36    0.80
  -1 -10   0    0.31    0.19
  10  -1   0    1.23    0.47
 -10   1   0    0.22    0.19
   1  10   0    0.88    0.26
  -1 -10  -1  585.00    8.19
  10  -1  -1  586.03    9.38
  -1 -10   1  571.43    7.22
  10  -1   1  594.37    9.27
   1  10  -1  569.10    7.32
 -10   1  -1  576.95    7.46
   1  10   1  575.98    8.27
 -10   1   1  568.18    8.23
  -1 -10  -2    4.94    0.56
  10  -1   2    6.52    0.78
 -10   1  -2    5.98    0.76
 -10   1   2    6.47    0.67
   1  10   2    5.97    0.64
  10  -1   3   61.75    2.35
 -10   1  -3   63.58    2.41
   1  10   3   60.95    2.25
 -10   1   3   61.49    2.26
  -1 -10  -3   62.17    2.24
 -10   1  -4    8.27    0.90
  -1 -10  -4    6.76    0.80
  10  -1   4    8.59    0.93
 -10   1  -5  234.25    5.35
  10  -1   5  219.68    5.19
   1  10  -5  222.99    3.20
  -1 -10  -5  224.20    5.33
 -10   1  -6   13.31    1.23
 -10   1  -6   13.66    0.85
   1  10  -6   12.47    0.66
  -1 -10  -6   15.18    1.35
  10  -1   6   14.14    1.25
  10  -1   7    9.86    1.13
   1  10   7    8.70    1.00
 -10   1  -7   10.91    0.87
   1  10  -7   10.40    0.71
 -10   1  -8    1.05    0.43
  10  -1   8    0.67    0.51
   1  10  -8    0.70    0.29
 -10   1  -9   37.95    1.91
   1  10  -9   36.52    1.69
  10  -1   9   41.93    2.49
 -10   1 -10    6.44    0.82
  10  -1  10    5.74    1.03
 -10   1 -11   10.75    1.20
  10  -1  11    9.03    1.34
 -10   1 -12    4.19    0.88
  10  -1  12    4.82    1.10
  10  -1  13    4.18    1.09
  10   0   0  351.72    6.51
   0 -10   0  345.16    5.02
   0 -10   1   14.96    0.52
  10   0  -1   14.17    1.13
  10   0   1   13.63    1.09
 -10   0  -1   15.33    0.59
   0 -10  -1   13.79    0.81
  10   0   2    6.37    0.76
 -10   0  -2    7.65    0.87
   0 -10  -2    7.53    0.70
 -10   0  -3   18.64    1.30
  10   0   3   19.28    1.32
   0 -10  -3   17.13    1.16
  10   0   4   27.21    1.61
 -10   0  -4   26.45    1.60
 -10   0  -4   25.55    0.69
   0 -10  -4   26.76    1.56
  10   0   5    3.14    0.68
 -10   0  -5    3.59    0.62
 -10   0  -5    3.10    0.34
  10   0  -5    3.92    0.74
   0 -10  -5    2.58    0.59
   0  10  -6   20.43    0.78
 -10   0  -6   21.26    1.55
  10   0  -6   19.53    1.52
 -10   0  -6   20.58    0.97
   0 -10  -6   20.95    1.60
  10   0   6   20.96    1.56
  10   0   7   15.27    1.40
  10   0  -7   13.83    1.41
 -10   0  -7   14.13    0.95
   0  10  -7   13.03    0.75
   0  10  -8    7.42    0.65
  10   0  -8    7.55    1.11
 -10   0  -8    8.25    0.78
  10   0   8    9.40    1.21
  10   0  -9   46.81    2.80
 -10   0  -9   48.17    2.07
   0  10  -9   45.04    1.80
  10   0   9   46.93    2.75
 -10   0 -10    0.03    0.40
  10   0  10   -0.84    0.69
 -10   0 -11   17.98    1.50
  10   0  11   17.10    1.82
  10   0  12    0.69    0.78
  10   0  13   20.80    2.23
  10   1   0    0.51    0.42
   1 -10   0   -0.29    0.19
  10   1   1  202.45    4.58
  10   1  -1  203.89    4.63
   1 -10   1  199.58    2.78
   1 -10  -1  202.14    3.75
 -10  -1  -2   18.06    1.26
  10   1   2   18.84    1.30
   1 -10  -2   19.97    1.12
  10   1   3   22.83    1.48
 -10  -1  -3   21.71    1.41
  10   1  -3   22.35    1.27
   1 -10  -3   23.34    1.34
  10   1   4   14.51    1.22
 -10  -1  -4   15.00    1.25
  10   1  -4   13.86    1.11
   1 -10  -4   15.07    1.18
  10   1   5   18.72    1.43
 -10  -1  -5   19.16    1.42
  10   1  -5   16.75    1.32
   1 -10  -5   18.27    1.40
  -1  10  -6    0.43    0.15
  10   1   6    0.01    0.37
 -10  -1  -6   -0.09    0.45
  10   1  -6   -0.63    0.52
   1 -10  -6    0.00    0.44
  -1  10  -7   43.13    1.36
  10   1  -7   46.05    2.50
  10   1   7   40.96    2.34
  -1  10  -8   20.54    1.05
  10   1  -8   22.67    1.87
  10   1   8   21.64    1.77
  -1  10  -9   41.60    1.71
  10   1  -9   41.56    2.65
  10   1   9   43.03    2.61
  10   1 -10    2.24    0.76
  10   1  10    2.23    0.87
  10   1 -11    1.30    0.79
  10   1  11    0.48    0.58
  10   1 -12    2.60    0.90
  10   1  12    2.68    0.97
  10   1  13    2.40    0.94
  10   2   0 1680.84   21.77
   2 -10   0 1663.87   19.89
  10   2   1   77.25    2.62
  10   2  -1   72.32    2.55
 -10  -2  -1   71.74    2.58
  10   2  -1   70.32    1.86
   2 -10  -1   74.80    2.05
   2 -10   1   73.46    1.37
  10   2   2  689.02   10.82
 -10  -2  -2  715.39   10.92
  10   2  -2  697.42   10.84
  10   2  -2  699.92    9.88
   2 -10  -2  677.64   10.04
  10   2   3   38.43    1.90
 -10  -2  -3   39.08    1.93
  10   2  -3   41.10    1.76
   2 -10  -3   37.95    1.76
  10   2   4  309.04    6.43
 -10  -2  -4  317.39    6.54
  10   2  -4  311.66    6.18
   2 -10  -4  317.36    6.35
  10   2   5   14.13    1.27
 -10  -2  -5   15.54    1.31
  10   2  -5   17.12    1.37
   2 -10  -5   15.39    1.30
 -10  -2  -6  363.38    7.56
  -2  10  -6  355.10    4.88
  10   2  -6  359.23    7.51
   2 -10  -6  360.38    7.62
  10   2   6  343.77    7.28
  -2  10  -7    0.37    0.22
  10   2  -7    0.18    0.49
  10   2   7    0.43    0.47
  -2  10  -8  102.47    2.57
  10   2  -8  111.65    4.21
  10   2   8  107.53    4.05
  -2  10  -9    8.68    0.79
  10   2  -9   10.76    1.41
  10   2   9    9.68    1.32
  10   2 -10   49.41    3.07
  10   2  10   46.43    2.87
  10   2 -11    2.20    0.86
  10   2  11    1.40    0.81
  10   2 -12   25.81    2.46
  10   2  12   29.41    2.58
  10   2  13    4.08    1.25
  10   3   0    0.01    0.34
  10   3   0    0.01    0.17
   3 -10   0    0.00    0.23
  10   3   1   68.32    2.52
   3 -10   1   68.19    1.50
  10   3  -1   67.70    1.87
   3 -10  -1   68.70    2.03
  10   3  -1   68.86    2.51
 -10  -3  -1   64.72    2.46
  10   3   2   14.57    1.18
   3 -10  -2   14.98    1.03
  10   3  -2   14.39    0.93
  10   3  -2   14.93    1.17
 -10  -3  -2   17.45    1.27
  10   3   3  147.33    4.04
 -10  -3  -3  152.07    4.10
   3 -10  -3  156.34    3.93
  10   3  -3  146.98    3.65
  10   3   4    0.13    0.43
 -10  -3  -4   -0.02    0.33
  10   3  -4    0.11    0.37
   3 -10  -4   -0.64    0.49
  10   3   5    3.35    0.72
 -10  -3  -5    3.98    0.72
  10   3  -5    4.30    0.76
   3 -10  -5    3.24    0.67
  -3  10  -6   55.79    1.36
  10   3  -6   55.77    2.63
   3 -10  -6   60.59    2.81
  10   3   6   55.59    2.65
  -3  10  -7   59.23    1.66
  10   3  -7   57.33    2.83
  10   3   7   57.65    2.85
  -3  10  -8    6.61    0.60
  10   3  -8    6.08    1.05
  10   3   8    5.35    1.02
  -3  10  -9   25.40    1.33
  10   3  -9   27.23    2.21
  10   3   9   27.95    2.16
  10   3 -10    0.79    0.62
  10   3  10    2.07    0.79
  10   3 -11    2.06    0.77
  10   3  11    2.11    0.76
  10   3 -12   19.29    2.17
  10   3  12   19.13    2.11
  10   3  13    8.25    1.51
  10   4   0  552.19    7.49
  10   4   0  566.61    9.18
  10   4   1   51.11    2.19
  10   4   1   48.92    1.05
  10   4  -1   49.16    1.63
 -10  -4  -1   49.83    2.16
  10   4  -1   49.66    2.09
   4 -10   2   66.44    1.30
  10   4   2   68.22    2.58
 -10  -4  -2   71.57    2.65
  10   4  -2   63.95    2.44
  10   4  -2   68.44    2.19
  10   4   3    3.38    0.68
 -10  -4  -3    3.06    0.62
  10   4  -3    1.71    0.40
   4 -10  -3    3.58    0.61
  10   4   4  105.50    3.48
 -10  -4  -4  110.67    3.57
   4 -10  -4  105.82    3.43
  10   4  -4  107.65    3.35
 -10  -4  -5   97.96    3.47
   4 -10  -5   97.71    3.48
  10   4  -5   89.70    3.26
  10   4   5   92.50    3.41
  -4  10  -6   31.51    1.05
  10   4  -6   33.91    2.08
   4 -10  -6   34.59    2.24
  10   4   6   31.12    2.01
  -4  10  -7    6.74    0.56
  10   4  -7    7.03    1.04
  10   4   7    6.47    0.99
  -4  10  -8   30.35    1.33
  10   4  -8   35.37    2.38
  10   4   8   34.24    2.32
  -4  10  -9   11.18    0.91
  10   4  -9   12.77    1.55
  10   4   9   14.04    1.61
  10   4 -10    5.73    1.18
  10   4  10    2.95    0.85
  10   4 -11   26.11    2.43
  10   4  11   29.27    2.48
  10   4 -12    0.45    0.69
  10   4  12    1.51    0.82
  10   5   0    0.17    0.40
  10   5  -1  110.72    3.28
 -10  -5  -1  117.91    3.46
  10   5   1  109.58    3.34
 -10  -5  -2   83.97    2.91
  10   5  -2   79.46    2.76
   5 -10   2   80.53    1.71
  10   5   2   81.84    2.89
  10   5  -3  161.84    4.20
 -10  -5  -3  170.27    4.45
  10   5   3  170.63    4.46
   5 -10   3  161.96    2.64
 -10  -5  -4    2.44    0.62
  10   5   4    2.47    0.63
   5 -10   4    2.16    0.32
 -10  -5  -5  182.82    4.98
   5 -10  -5  187.31    5.08
   5 -10   5  187.65    3.21
  10   5  -5  174.44    4.81
  10   5   5  170.20    4.79
  10   5   6    0.68    0.54
  -5  10  -6    0.06    0.18
  10   5  -6    0.18    0.44
   5 -10  -6   -0.05    0.41
  -5  10  -7    8.26    0.65
  10   5  -7    8.99    1.20
  10   5   7    8.14    1.16
  -5  10  -8    1.85    0.37
  10   5  -8    2.71    0.78
  10   5   8    1.99    0.62
  -5  10  -9   25.25    1.37
  10   5  -9   26.39    2.22
  10   5   9   26.89    2.22
  10   5 -10    5.57    1.19
  10   5  10    4.42    1.04
  10   5 -11   12.88    1.79
  10   5  11    8.73    1.40
  10   5 -12    0.18    0.67
  10   5  12   -0.16    0.75
  10   6   0  742.62   11.46
 -10  -6  -1   32.34    1.76
  10   6  -1   31.81    1.70
  10   6   1   30.87    1.71
   6 -10   2  408.66    5.94
 -10  -6  -2  424.71    7.77
  10   6  -2  412.71    7.45
  10   6   2  418.96    7.76
 -10  -6  -3    5.30    0.75
  10   6  -3    6.29    0.85
   6 -10   3    6.50    0.49
  10   6   3    6.81    0.92
  10   6   4  398.43    7.94
 -10  -6  -4  423.53    8.09
  10   6   4  407.67    5.42
   6 -10   4  390.80    5.74
  10   6   5    0.83    0.52
   6 -10   5    0.80    0.24
  -6  10  -6  244.57    4.31
  10   6  -6  248.96    6.27
   6 -10   6  254.93    4.46
  10   6   6  256.25    6.37
  -6  10  -7    1.72    0.34
  10   6  -7    2.29    0.74
  10   6   7    3.65    0.93
   6 -10   7    2.66    0.46
  -6  10  -8   38.28    1.62
  10   6  -8   42.35    2.67
  10   6   8   40.88    2.59
  -6  10  -9   -0.07    0.32
  10   6  -9    0.00    0.56
  10   6   9    0.55    0.63
  10   6 -10   72.87    3.92
  10   6  10   73.49    3.84
  10   6 -11    2.37    0.93
  10   6  11    1.73    0.92
  10   6 -12   17.05    2.14
  10   6  12   14.22    1.93
  10   7   0    0.00    0.38
  10   7  -1    7.06    0.84
   7 -10   1    5.94    0.58
 -10  -7  -1    7.39    0.87
  10   7   1    6.39    0.82
   7 -10   2   15.76    0.88
  10   7  -2   17.88    1.28
 -10  -7  -2   18.91    1.38
  10   7   2   17.07    1.35
  10   7  -3   23.45    1.48
 -10  -7  -3   22.23    1.55
   7 -10   3   21.46    0.98
  10   7   3   21.29    1.53
   7 -10   4   18.26    0.92
 -10  -7  -4   18.02    1.47
  10   7  -4   16.72    1.29
  10   7   4   18.57    0.81
  10   7   4   15.87    1.41
  10   7   5    1.89    0.60
  10   7   5    1.74    0.31
   7 -10   5    2.00    0.39
   7 -10   6    8.28    0.71
  10   7   6    9.13    1.21
  -7  10  -7   11.60    0.87
   7 -10   7   12.96    0.95
  10   7   7   13.22    1.47
  -7  10  -8    0.47    0.31
  10   7  -8    0.95    0.64
   7 -10   8    0.04    0.32
  10   7   8    1.01    0.76
  10   7  -9    5.47    1.17
  10   7   9    4.85    1.04
  10   7 -10    0.75    0.75
  10   7  10    1.10    0.75
  10   7 -11    0.78    0.96
  10   7  11   -0.77    0.82
  10   7 -12    9.09    1.70
  10   7  12    7.57    1.50
  10   8   0  135.27    3.79
 -10  -8  -1    9.74    1.02
  10   8  -1    9.38    0.96
   8 -10   1    9.25    0.77
  10   8   1   11.59    1.13
 -10  -8  -2    2.07    0.55
  10   8  -2    2.56    0.61
   8 -10   2    2.23    0.43
  10   8   2    0.73    0.37
   8 -10   3    6.56    0.61
  10   8  -3    5.73    0.74
 -10  -8  -3    5.86    0.85
  10   8   3    5.69    0.86
  10   8  -4    4.85    0.73
   8 -10   4    5.57    0.57
  10   8   4    5.75    0.89
  10   8  -5   23.07    1.58
  10   8   5   22.99    1.08
  10   8   5   26.87    1.90
   8 -10   5   23.87    1.20
  10   8   6   13.10    0.88
   8 -10   6   12.45    0.92
  10   8   6   11.96    1.35
  -8  10  -7    9.52    0.84
   8 -10   7    8.18    0.78
  10   8   7    9.86    1.29
  -8  10  -8    2.93    0.49
   8 -10   8    3.99    0.70
  10   8   8    0.83    0.60
  10   8  -9   13.89    1.67
   8 -10   9   12.09    1.11
  10   8   9   13.15    1.65
  10   8 -10    1.58    0.90
  10   8  10    1.23    0.72
  10   8 -11   14.35    1.99
  10   8  11   12.48    1.90
  10   9   0    0.54    0.44
   9 -10   1  220.62    4.53
 -10  -9  -1  219.98    5.20
  10   9   1  224.20    5.25
  10   9  -1  219.98    5.07
  10   9  -2   24.59    1.52
   9 -10   2   23.48    1.23
 -10  -9  -2   24.13    1.60
  10   9   2   22.37    1.56
 -10  -9  -3  100.84    3.51
  10   9  -3  100.81    3.18
  10   9   3   98.81    3.50
   9 -10   3   98.51    2.68
  10   9  -4    2.38    0.56
  10   9   4    1.23    0.45
   9 -10   4    2.08    0.45
  10   9  -5   93.42    3.17
  10   9   5   90.14    2.40
  10   9   5   88.01    3.57
   9 -10   5   90.78    2.62
  10   9  -6   16.41    1.37
  10   9   6   16.80    1.05
  10   9   6   19.15    1.71
   9 -10   6   18.94    1.22
  10   9   7   25.38    1.39
  10   9   7   24.61    2.04
   9 -10   7   25.17    1.44
  -9  10  -8    0.79    0.36
   9 -10   8    1.14    0.53
  10   9   8    1.65    0.73
   9 -10   9   34.35    1.94
  10   9   9   33.08    2.62
  10   9 -10    1.09    0.95
   9 -10  10    0.83    0.47
  10   9  10    1.99    0.96
  10   9 -11   10.38    1.68
  10   9  11   10.44    1.70
 -10 -10   0  357.92    7.09
  10  10   0  362.41    7.06
 -10 -10  -1   32.53    1.85
  10 -10   1   34.35    1.66
  10  10  -1   34.90    1.83
  10  10   1   35.79    1.95
  10 -10   2  251.25    5.03
 -10 -10  -2  258.83    5.91
  10  10   2  253.76    5.91
  10  10  -2  259.36    5.57
  10  10  -3    5.97    0.77
  10 -10   3    7.52    0.77
  10  10   3    6.70    0.94
  10  10  -4   90.76    3.06
  10 -10   4   91.16    2.71
  10  10   4   87.78    3.47
  10  10  -5    0.39    0.42
  10 -10   5   -0.68    0.38
  10  10   5   -0.34    0.53
  10  10  -6  119.60    3.72
  10  10   6  119.58    3.14
  10  10   6  120.23    4.44
  10 -10   6  119.46    3.33
  10  10  -7    0.18    0.44
  10  10   7    0.20    0.37
  10 -10   7    0.46    0.34
  10  10   7    0.46    0.67
  10 -10   8   79.57    2.89
  10  10   8   85.62    4.04
  10  10   9   -0.16    0.66
  10 -10   9   -0.34    0.42
  10  10 -10   11.80    1.71
  10  10  10   14.38    1.90
  10  10 -11    0.02    0.83
  10  10  11   -0.33    0.70
 -10 -11   0    0.25    0.39
  11 -10   0    0.11    0.37
  10  11   0   -0.13    0.42
 -10 -11  -1    1.87    0.50
  11 -10   1    1.61    0.43
  10  11  -1    1.27    0.48
  10  11   1    1.11    0.41
 -10 -11  -2    6.34    0.90
  11 -10   2    6.31    0.75
  10  11  -2    7.21    0.88
  10  11   2    7.66    1.01
  10  11  -3    3.42    0.60
  11 -10   3    3.15    0.55
  10  11   3    1.93    0.57
  10  11  -4   28.02    1.66
  11 -10   4   26.48    1.48
  10  11   4   25.68    1.88
  10  11  -5    4.52    0.71
  11 -10   5    4.89    0.70
  10  11   5    3.32    0.80
  11 -10   6    2.10    0.46
  10  11  -6    2.99    0.65
  10  11   6    2.22    0.55
  10  11   6    2.21    0.75
  10  11  -7    0.15    0.40
  10  11   7   -0.03    0.39
  10  11   7    0.22    0.67
  11 -10   7   -0.23    0.34
  10  11  -8    6.81    0.92
  10  11   8   12.57    1.67
  11 -10   8    9.81    1.06
  10  11   9    1.12    0.73
  11 -10   9    2.52    0.70
  10  11  10   10.24    1.63
  -9 -11   0   66.68    2.56
  11  -9   0   66.14    2.57
   9  11   0   69.56    2.61
  -9 -11  -1   -0.34    0.40
  11  -9   1    0.05    0.36
   9  11  -1   -0.44    0.39
   9  11   1   -0.12    0.39
  -9 -11  -2   -0.03    0.31
  11  -9   2    0.35    0.41
   9  11  -2    0.25    0.36
   9  11   2    0.56    0.47
  11  -9   3    7.54    0.84
  -9 -11  -3    6.01    0.89
   9  11  -3    6.43    0.77
   9  11   3    6.53    0.89
   9  11  -4    1.99    0.52
  11  -9   4    1.54    0.46
   9  11   4    2.54    0.75
   9  11  -5   43.47    2.00
  11  -9   5   42.51    1.96
   9  11   5   44.31    2.53
  11  -9   6    3.42    0.61
   9  11  -6    4.22    0.73
   9  11   6    3.56    0.63
   9  11   6    5.24    0.97
   9  11  -7    0.69    0.52
   9  11   7    0.05    0.40
   9  11   7    0.14    0.54
  11  -9   7    0.47    0.39
 -11   9  -8    1.28    0.54
   9  11   8    0.67    0.64
  11  -9   8    0.84    0.42
  11  -9   9   10.83    1.20
   9  11   9   10.39    1.58
  11  -9  10   -0.25    0.49
   9  11  10    0.30    0.68
   9  11  11    4.77    1.27
  11  -8   0   -0.12    0.34
  -8 -11   0   -0.14    0.28
   8  11   0    0.30    0.36
  -8 -11  -1  179.79    4.41
  11  -8   1  184.90    4.41
   8  11  -1  185.51    4.26
   8  11   1  182.75    4.48
  11  -8   2   82.06    2.72
  -8 -11  -2   82.94    2.94
   8  11  -2   85.05    2.66
   8  11   2   78.95    2.78
   8  11  -3  101.07    2.92
  -8 -11  -3   98.36    3.38
  11  -8   3  100.10    3.06
   8  11   3  100.40    3.45
  -8 -11  -4    0.45    0.50
   8  11  -4    0.21    0.34
  11  -8   4    0.22    0.31
   8  11   4   -0.86    0.54
   8  11  -5  136.25    3.53
  11  -8   5  133.54    3.69
   8  11   5  134.02    4.41
   8  11  -6    0.82    0.43
  11  -8   6    0.68    0.41
   8  11   6    0.40    0.65
   8  11  -7   91.31    3.03
 -11   8  -7   88.41    3.15
   8  11   7   93.02    3.12
  11  -8   7   94.47    3.25
   8  11   7   95.29    4.00
 -11   8  -8    0.80    0.50
   8  11   8    1.05    0.44
  11  -8   8    0.10    0.43
   8  11   8    1.29    0.82
   8  11   9   44.24    3.20
  11  -8   9   39.53    2.26
   8  11  10   -2.03    1.09
  11  -8  10   -0.04    0.44
   8  11  11    9.73    1.56
  11  -8  11   10.72    1.37
  11  -7   0  258.15    5.54
  -7 -11   0  254.49    5.12
   7  11   0  260.50    5.20
  -7 -11  -1    2.70    0.53
  11  -7   1    2.92    0.60
   7  11  -1    3.23    0.49
   7  11   1    2.88    0.56
  11  -7   2  136.32    3.66
  -7 -11  -2  141.30    3.82
   7  11  -2  136.79    3.35
   7  11   2  143.24    3.89
  11  -7   3   36.83    1.80
   7  11  -3   32.83    1.50
  -7 -11  -3   35.50    1.92
   7  11   3   33.01    1.86
  11  -7   4   94.63    2.99
  -7 -11  -4   96.65    3.39
   7  11  -4   93.07    2.66
 -11   7   4   95.56    3.43
   7  11   4   99.64    3.50
   7  11  -5    0.26    0.35
  11  -7   5    1.76    0.54
   7  11   5    0.82    0.62
   7  11  -6   78.88    2.54
 -11   7  -6   74.78    2.83
   7  11   6   69.09    3.20
  11  -7   6   78.81    2.87
  11  -7   7    3.16    0.66
 -11   7  -7    3.00    0.60
   7  11   7    3.33    0.64
   7  11   7    2.16    0.85
 -11   7  -8  110.94    3.72
   7  11   8  111.11    4.55
   7  11   8  107.80    3.62
  11  -7   8  104.40    3.66
   7  11   9    1.28    0.77
  11  -7   9    1.67    0.59
  11  -7  10   15.36    1.53
   7  11  10   15.45    1.92
  11  -7  11   -0.10    0.59
 -11   7 -12    3.86    1.03
  11  -7  12    2.88    0.84
  -6 -11   0    0.34    0.36
  11  -6   0    0.11    0.42
   6  11   0    0.15    0.26
  -6 -11  -1    4.29    0.59
  11  -6   1    3.96    0.65
   6  11   1    6.04    0.73
   6  11  -1    5.28    0.60
  11  -6   2    0.88    0.45
  -6 -11  -2   -0.25    0.34
   6  11  -2    0.34    0.32
   6  11   2    0.53    0.42
   6  11  -3   16.03    0.96
  11  -6   3   16.95    1.22
  -6 -11  -3   16.85    1.28
   6  11   3   16.84    1.31
  11  -6   4    4.46    0.70
  -6 -11  -4    5.48    0.79
   6  11  -4    5.06    0.58
 -11   6   4    4.51    0.77
   6  11   4    5.85    0.88
  -6 -11  -5   19.22    1.56
  11  -6   5   17.77    1.30
   6  11  -5   16.70    1.02
 -11   6  -5   16.51    1.30
 -11   6   5   16.93    1.45
   6  11   5   18.52    1.54
 -11   6  -6   59.19    2.51
   6  11  -6   59.64    2.06
   6  11   6   65.12    3.07
  11  -6   6   61.56    2.55
  11  -6   7    0.12    0.36
 -11   6  -7    0.02    0.39
   6  11   7    0.22    0.42
   6  11   7   -0.23    0.50
   6  11   8    1.08    0.51
  11  -6   8    0.49    0.48
   6  11   8   -0.12    0.67
   6  11   9    2.37    0.91
  11  -6   9    3.16    0.80
  11  -6  10   15.07    1.52
   6  11  10   15.44    1.85
 -11   6 -11   -0.15    0.51
  11  -6  11   -0.20    0.66
 -11   6 -12   12.00    1.50
  11  -6  12    9.55    1.43
  -5 -11   0   84.72    2.37
  11  -5   0   86.33    2.88
   5  11   0   78.23    2.27
  -5 -11   1   20.36    1.06
  11  -5   1   20.09    1.33
  -5 -11  -1   20.38    1.20
   5  11  -1   20.55    1.06
   5  11   1   19.98    1.21
  11  -5   2   44.89    2.00
  -5 -11  -2   43.25    1.88
   5  11  -2   43.08    1.51
   5  11   2   43.86    1.93
  -5 -11  -3    2.79    0.55
  11  -5   3    2.84    0.59
   5  11  -3    2.67    0.37
 -11   5   3    3.52    0.68
   5  11   3    3.40    0.60
  11  -5   4    1.69    0.49
  -5 -11  -4    1.72    0.50
   5  11  -4    1.66    0.33
 -11   5   4    1.83    0.47
   5  11   4    2.34    0.59
  -5 -11  -5   41.01    2.18
  11  -5   5   38.82    1.95
   5  11  -5   39.32    1.46
 -11   5  -5   40.74    2.03
 -11   5   5   36.10    2.09
   5  11   5   38.77    2.21
   5  11  -6   -0.03    0.28
 -11   5  -6   -0.05    0.36
  11  -5   6    0.56    0.40
   5  11   6    0.46    0.47
  11  -5   7   -0.19    0.41
 -11   5  -7    0.04    0.32
   5  11   7    0.45    0.40
   5  11   7   -0.32    0.50
   5  11  -8   -0.12    0.33
   5  11   8    0.37    0.65
  11  -5   8   -0.27    0.44
   5  11   9    8.36    1.31
   5  11  -9    8.43    0.96
  11  -5   9    7.84    1.13
  11  -5  10    3.18    0.82
 -11   5 -11    9.75    1.26
  11  -5  11    8.32    1.39
  11  -5  12    3.02    0.89
  11  -5  13    4.53    1.06
  -4 -11   0   -0.04    0.21
  11  -4   0    0.16    0.35
   4  11   0   -0.15    0.25
  -4 -11   1  643.97    8.75
  11  -4   1  636.34   10.07
  -4 -11  -1  639.83    9.37
   4  11   1  647.96    9.47
   4  11  -1  611.25    8.64
   4  11  -2    1.58    0.29
  -4 -11  -2    1.45    0.40
  11  -4   2    2.06    0.52
 -11   4   2    2.17    0.49
   4  11   2    1.55    0.42
  -4 -11  -3  433.53    7.56
   4  11  -3  416.59    6.00
  11  -4   3  415.32    7.57
 -11   4   3  425.46    7.64
   4  11   3  426.97    7.62
  -4 -11  -4   -0.02    0.37
  11  -4   4   -0.02    0.34
 -11   4  -4   -0.22    0.30
   4  11  -4    0.15    0.19
 -11   4   4   -0.16    0.33
   4  11   4   -0.18    0.44
  -4 -11  -5  121.40    3.87
  11  -4   5  118.54    3.61
 -11   4  -5  123.01    3.70
   4  11  -5  125.33    2.58
 -11   4   5  124.59    3.99
   4  11   5  118.24    3.95
 -11   4  -6    0.50    0.47
   4  11  -6    1.01    0.31
  11  -4   6    0.71    0.47
   4  11   6    1.27    0.58
 -11   4  -7   59.56    2.68
   4  11  -7   63.20    2.06
   4  11   7   58.95    2.63
   4  11   7   60.92    3.03
  11  -4   7   59.93    2.69
  11  -4   8    9.56    1.19
   4  11  -8   10.55    0.99
   4  11   8   11.54    1.49
   4  11  -9   65.55    2.43
  11  -4   9   60.32    2.98
 -11   4 -10    0.39    0.40
  11  -4  10    0.49    0.50
 -11   4 -11   26.00    1.93
  11  -4  11   24.60    2.11
  11  -4  12    4.23    1.01
  11  -4  13    7.98    1.40
  11  -3   0  533.82    8.97
  -3 -11   0  526.04    7.58
   3  11   0  533.92    7.73
  -3 -11  -1   -0.26    0.27
  -3 -11   1    0.38    0.22
  11  -3   1   -0.24    0.36
 -11   3   1    0.17    0.25
   3  11  -1    0.27    0.22
   3  11   1    0.45    0.27
  -3 -11  -2  206.34    4.35
  11  -3   2  204.00    4.72
 -11   3   2  205.66    4.42
   3  11   2  202.52    4.40
   3  11  -2  202.71    3.30
  -3 -11  -3    1.52    0.43
   3  11  -3    1.97    0.25
  11  -3   3    1.22    0.43
 -11   3   3    2.00    0.43
   3  11   3    1.72    0.50
   3  11  -4  214.45    3.30
  11  -3   4  209.53    4.96
  -3 -11  -4  210.57    5.02
 -11   3  -4  218.76    5.10
 -11   3   4  211.02    5.09
   3  11   4  226.23    5.40
  -3 -11  -5    2.09    0.58
  11  -3   5    1.44    0.52
   3  11  -5    1.67    0.26
 -11   3  -5    0.83    0.40
 -11   3   5    2.11    0.61
   3  11   5    1.62    0.54
   3  11  -6   23.14    0.98
 -11   3  -6   21.67    1.55
   3  11   6   21.54    1.69
   3  11  -6   22.20    0.99
 -11   3   6   19.24    1.61
  11  -3   6   21.30    1.54
  11  -3   7    5.79    0.85
   3  11  -7    7.50    0.66
  11  -3   8   48.40    2.56
   3  11  -8   48.33    1.82
 -11   3  -9    0.32    0.38
  11  -3   9    0.04    0.56
   3  11  -9    0.01    0.32
 -11   3 -10   12.52    1.24
  11  -3  10   11.08    1.44
 -11   3 -11    5.72    0.96
  11  -3  11    4.55    1.00
  11  -3  12    1.11    0.63
  11  -3  13    0.87    0.82
  -2 -11   0    0.21    0.19
  11  -2   0   -0.16    0.41
 -11   2   0    0.47    0.27
   2  11   0    0.42    0.25
  -2 -11  -1    9.14    0.72
  -2 -11   1    8.39    0.51
  11  -2   1    8.49    0.92
  11  -2  -1    7.31    0.88
 -11   2   1    9.69    0.78
   2  11   1    9.34    0.76
   2  11  -1    9.31    0.57
  -2 -11  -2   14.67    0.99
  11  -2   2   13.17    1.14
   2  11   2   14.09    1.05
 -11   2   2   13.39    0.98
   2  11  -2   12.55    0.52
  11  -2   3   41.92    2.00
  -2 -11  -3   42.56    1.88
 -11   2  -3   42.04    2.03
 -11   2   3   43.23    1.96
   2  11   3   44.59    1.97
  11  -2   4   10.71    1.09
  -2 -11  -4    9.05    0.96
 -11   2  -4   13.49    1.20
 -11   2   4   10.09    1.00
   2  11   4    9.28    0.96
  11  -2   5    0.51    0.48
  -2 -11  -5    0.41    0.32
 -11   2  -5    0.25    0.43
   2  11  -5    0.47    0.14
 -11   2   5    0.04    0.39
   2  11  -5    0.50    0.16
   2  11   5    1.23    0.61
 -11   2  -6    9.40    1.05
  -2 -11  -6    9.20    1.11
  11  -2   6   10.04    1.13
   2  11  -6    9.49    0.56
  11  -2   7    5.09    0.91
 -11   2  -7    5.61    0.66
   2  11  -7    4.60    0.48
 -11   2  -8    1.53    0.45
   2  11  -8    1.49    0.36
  11  -2   8    1.14    0.55
 -11   2  -9   14.55    1.19
  11  -2   9   13.80    1.47
   2  11  -9   15.04    1.04
 -11   2 -10   66.26    2.75
  11  -2  10   63.45    3.28
 -11   2 -11   -0.48    0.46
  11  -2  11    0.90    0.67
  11  -2  12   21.72    2.28
  11  -2  13    0.29    0.73
  -1 -11   0   77.82    1.85
 -11   1   0   74.11    1.92
  11  -1   0   76.70    2.71
  -1 -11  -1    3.50    0.46
  11  -1   1    4.01    0.67
  11  -1  -1    4.00    0.71
  -1 -11   1    3.20    0.27
 -11   1   1    3.95    0.51
 -11   1  -1    3.53    0.36
  11  -1   2   26.35    1.58
 -11   1  -2   27.46    0.80
 -11   1   2   25.89    1.34
  -1 -11  -2   27.46    1.35
  -1 -11  -3    2.86    0.50
 -11   1   3    3.43    0.58
  11  -1   3    3.16    0.61
 -11   1  -3    4.57    0.70
  11  -1   4    6.45    0.88
  -1 -11  -4    5.19    0.73
 -11   1  -4    7.70    0.93
  11  -1   5   -0.32    0.45
  -1 -11  -5   -0.32    0.52
 -11   1  -5    0.98    0.47
 -11   1  -5    0.32    0.21
   1  11  -6    2.87    0.26
  11  -1   6    3.74    0.77
 -11   1  -6    2.87    0.65
 -11   1  -6    3.61    0.44
  -1 -11  -6    4.27    0.75
  11  -1   7    1.38    0.58
   1  11  -7    2.22    0.30
 -11   1  -7    3.13    0.48
 -11   1  -8   16.24    1.09
   1  11  -8   17.27    0.97
  11  -1   8   17.09    1.58
   1  11  -9    4.16    0.54
 -11   1  -9    4.90    0.70
  11  -1   9    3.21    0.75
 -11   1 -10   -0.80    0.49
  11  -1  10   -0.03    0.54
 -11   1 -11    4.73    0.81
  11  -1  11    4.21    0.96
  11  -1  12    4.01    1.15
  11  -1  13    7.95    1.60
  11   0   0    0.71    0.38
   0 -11   0    0.21    0.16
   0 -11   1  904.48   10.79
  11   0   1  909.68   13.40
  11   0  -1  931.82   13.56
   0 -11  -1  898.91   11.89
  11   0   2    0.06    0.39
 -11   0  -2   -0.29    0.32
   0 -11  -2   -0.06    0.26
 -11   0  -3  418.13    7.65
  11   0   3  391.27    7.46
   0 -11  -3  398.28    7.04
 -11   0  -4    5.79    0.82
  11   0   4    5.83    0.83
   0 -11  -4    5.41    0.73
  11   0   5  300.95    6.51
 -11   0  -5  319.22    6.69
 -11   0  -5  296.12    4.14
   0 -11  -5  303.21    6.54
   0  11  -6    9.88    0.39
  11   0   6   11.56    1.21
 -11   0  -6   11.05    0.65
   0 -11  -6    9.95    1.12
   0  11  -7   95.01    1.99
 -11   0  -7   94.18    2.39
  11   0   7   95.20    3.60
   0  11  -8   12.39    0.77
 -11   0  -8   12.06    0.91
  11   0   8   12.29    1.40
   0  11  -9   71.54    2.19
 -11   0  -9   68.03    2.42
  11   0   9   66.76    3.28
  11   0  10    0.53    0.65
  11   0  11   36.92    2.66
  11   0  12    2.56    1.03
  11   0  13    5.56    1.26
  11   1   0   20.06    1.35
   1 -11   0   17.28    0.77
  11   1   1   23.92    1.51
  11   1  -1   24.64    1.54
   1 -11   1   23.17    0.65
   1 -11  -1   21.78    1.07
 -11  -1  -2  189.34    4.64
  11   1   2  180.45    4.52
   1 -11  -2  169.84    3.79
 -11  -1  -3    0.11    0.32
  11   1   3    0.49    0.37
   1 -11  -3    0.23    0.30
  11   1   4  109.68    3.56
 -11  -1  -4  116.78    3.65
  11   1  -4  112.78    3.33
   1 -11  -4  110.00    3.40
  11   1   5   33.41    1.96
 -11  -1  -5   35.17    2.01
  11   1  -5   30.25    1.81
   1 -11  -5   33.21    1.92
  11   1  -6   21.45    1.64
   1 -11  -6   20.47    1.62
  11   1   6   20.53    1.58
  -1  11  -7    8.36    0.51
  11   1   7    7.98    1.10
  11   1  -7    8.74    1.12
  -1  11  -8   42.56    1.42
  11   1  -8   42.56    2.57
  11   1   8   41.03    2.49
  -1  11  -9    6.43    0.62
  11   1  -9    8.78    1.30
  11   1   9    9.29    1.29
  11   1 -10   21.39    2.11
  11   1  10   17.27    1.79
  11   1 -11    5.02    1.09
  11   1  11    5.01    1.07
  11   1  12    1.95    1.05
  11   1  13    0.61    0.88
  11   2   0   -0.36    0.39
   2 -11   0    0.12    0.21
  11   2  -1   78.24    2.80
  11   2   1   83.78    2.87
   2 -11   1   79.67    1.46
   2 -11  -1   79.06    2.18
  11   2   2    9.28    0.97
 -11  -2  -2   10.54    1.08
  11   2  -2   10.48    1.05
  11   2  -2   10.23    0.83
   2 -11  -2    9.31    0.82
  11   2   3   38.09    1.99
 -11  -2  -3   41.34    2.06
  11   2  -3   38.92    1.74
   2 -11  -3   39.08    1.82
  11   2   4   21.78    1.58
 -11  -2  -4   22.80    1.57
  11   2  -4   24.48    1.50
   2 -11  -4   24.28    1.56
  11   2   5   81.85    3.18
 -11  -2  -5   82.37    3.17
  11   2  -5   82.05    3.04
   2 -11  -5   84.16    3.16
  11   2   6    9.98    1.17
  11   2  -6   10.56    1.17
   2 -11  -6   12.08    1.29
  -2  11  -7   13.78    0.64
  11   2   7   14.04    1.46
  11   2  -7   12.76    1.38
  -2  11  -8   40.11    1.37
  11   2  -8   42.37    2.57
  11   2   8   44.30    2.63
  -2  11  -9    6.10    0.62
  11   2  -9    5.04    1.03
  11   2   9    7.33    1.17
  11   2 -10   13.26    1.65
  11   2  10   15.91    1.76
  11   2 -11    4.46    1.10
  11   2  11    3.87    1.02
  11   2 -12    7.26    1.40
  11   2  12    8.47    1.57
  11   3   0    1.04    0.52
   3 -11   0    1.22    0.27
  11   3   1   45.39    2.12
  11   3  -1   41.13    2.02
  11   3  -1   42.32    1.45
   3 -11  -1   43.21    1.61
   3 -11   1   43.31    1.11
  11   3   2   55.17    2.38
 -11  -3  -2   60.05    2.48
  11   3  -2   55.92    2.39
   3 -11  -2   54.39    2.03
  11   3  -2   53.32    1.88
  11   3   3    8.92    1.01
 -11  -3  -3    9.32    1.01
  11   3  -3    9.16    0.87
   3 -11  -3    9.29    0.92
  11   3   4   28.88    1.81
 -11  -3  -4   26.62    1.73
  11   3  -4   26.97    1.60
   3 -11  -4   27.74    1.72
  11   3   5   40.41    2.23
  11   3  -5   45.23    2.23
   3 -11  -5   40.23    2.19
  11   3  -6   79.47    3.20
  11   3   6   67.91    2.91
   3 -11  -6   82.45    3.35
  11   3   7   14.89    1.54
  -3  11  -7   13.19    0.64
  11   3  -7   13.69    1.42
  -3  11  -8   52.06    1.60
  11   3  -8   53.53    2.93
  11   3   8   50.87    2.83
  -3  11  -9    0.07    0.24
  11   3  -9   -0.67    0.74
  11   3   9   -0.12    0.58
  11   3 -10    2.28    0.82
  11   3  10    3.62    1.02
  11   3 -11   -0.23    0.67
  11   3  11    0.20    0.79
  11   3 -12    7.49    1.55
  11   3  12    7.75    1.48
  11   4   0   -0.15    0.44
  11   4   0    0.11    0.17
   4 -11   0    0.01    0.19
  11   4   1  398.28    7.48
   4 -11  -1  380.70    6.39
  11   4  -1  387.05    6.11
 -11  -4  -1  410.53    7.57
  11   4  -1  389.38    7.36
   4 -11   2  164.23    2.38
  11   4   2  167.53    4.42
   4 -11   2  163.36    2.45
   4 -11  -2  161.72    3.87
  11   4  -2  167.59    3.72
 -11  -4  -2  168.81    4.43
  11   4  -2  164.47    4.31
  11   4   3  699.56   11.54
  11   4  -3  702.13   11.35
 -11  -4  -3  743.13   11.67
  11   4  -3  700.05   10.75
   4 -11  -3  693.69   10.95
  11   4   4   -0.07    0.45
 -11  -4  -4    0.29    0.45
  11   4  -4   -0.08    0.40
   4 -11  -4   -0.55    0.48
  11   4   5  469.29    9.24
  11   4  -5  483.65    9.04
   4 -11  -5  551.80   10.02
  11   4  -6   24.80    1.78
  11   4   6   23.96    1.80
  -4  11  -7   52.41    1.43
  11   4  -7   51.03    2.74
  11   4   7   55.31    2.88
  -4  11  -8    5.44    0.54
  11   4  -8    6.28    1.09
  11   4   8    6.85    1.19
  11   4  -9   96.37    4.22
  11   4   9   99.15    4.22
  11   4 -10    6.07    1.25
  11   4  10    4.80    1.11
  11   4 -11   35.54    2.82
  11   4  11   36.93    2.85
  11   4 -12   -0.49    0.70
  11   4  12   -1.15    0.87
  11   5   0    0.93    0.27
  11   5   0    0.81    0.44
  11   5   1    0.18    0.15
  11   5  -1    0.03    0.23
  11   5  -1    0.04    0.37
 -11  -5  -1    0.03    0.33
  11   5   1    0.25    0.43
  11   5   2   79.35    2.96
  11   5  -2   85.51    2.57
  11   5  -2   86.58    3.01
   5 -11   2   81.30    1.68
 -11  -5  -2   90.50    3.14
  11   5   3    1.35    0.55
   5 -11   3    1.00    0.18
 -11  -5  -3    0.12    0.38
  11   5  -3    1.22    0.53
  11   5  -3    0.48    0.30
  11   5   4   33.51    2.00
 -11  -5  -4   35.28    2.06
   5 -11  -4   33.06    1.93
  11   5  -4   32.76    1.83
   5 -11   4   34.48    0.85
  11   5   5    3.90    0.77
  11   5  -5    5.42    0.84
   5 -11  -5    5.17    0.85
  11   5   6   -0.12    0.52
  11   5  -6   -0.12    0.44
  -5  11  -7   -0.35    0.23
  11   5  -7   -0.01    0.46
  11   5   7    0.47    0.51
  -5  11  -8   44.50    1.56
  11   5  -8   43.78    2.71
  11   5   8   43.78    2.70
  11   5  -9   13.32    1.64
  11   5   9   12.89    1.60
  11   5 -10   13.04    1.71
  11   5  10   17.40    1.90
  11   5 -11   -0.22    0.70
  11   5  11   -0.54    0.93
  11   5 -12   -0.74    0.71
  11   5  12   -0.85    0.80
  11   6   0    0.37    0.43
  11   6  -1   36.41    1.92
 -11  -6  -1   35.54    1.94
  11   6   1   40.50    2.04
  11   6  -2   -0.10    0.40
   6 -11   2   -0.16    0.19
 -11  -6  -2    0.09    0.36
  11   6   2    0.11    0.43
 -11  -6  -3   -0.14    0.40
  11   6  -3    0.45    0.41
   6 -11   3    0.19    0.18
  11   6   3   -0.34    0.40
  11   6  -4    5.86    0.88
  11   6   4    7.60    1.04
   6 -11   4    8.08    0.50
   6 -11  -5   39.14    2.25
  11   6  -5   36.03    2.10
  11   6   5   36.30    2.18
   6 -11   5   39.48    1.22
  11   6   6    2.60    0.85
  11   6  -6    1.72    0.62
   6 -11   6    1.64    0.31
  -6  11  -7    1.38    0.33
  11   6  -7    0.41    0.52
  11   6   7    0.74    0.57
  -6  11  -8   46.73    1.67
  11   6  -8   45.50    2.84
  11   6   8   43.47    2.76
  11   6  -9   -0.01    0.60
  11   6   9   -0.42    0.68
  11   6 -10   21.22    2.16
  11   6  10   22.45    2.21
  11   6 -11    3.22    1.05
  11   6  11    3.74    1.19
  11   6 -12    9.26    1.67
  11   7   0  194.76    4.86
 -11  -7  -1    0.58    0.37
   7 -11   1    0.90    0.30
  11   7  -1    0.29    0.37
  11   7   1    1.64    0.54
 -11  -7  -2  277.37    6.15
   7 -11   2  261.82    4.40
  11   7  -2  256.77    5.72
  11   7   2  256.17    5.94
  11   7  -3    4.33    0.72
 -11  -7  -3    5.44    0.87
   7 -11   3    4.64    0.47
  11   7   3    6.30    0.93
  11   7   4  169.01    4.88
  11   7  -4  170.43    4.57
  11   7   4  171.13    2.73
   7 -11   4  167.85    3.15
  11   7   5    0.80    0.54
   7 -11   5    0.56    0.25
  11   7   6   15.31    1.52
   7 -11   6   16.07    0.91
  11   7  -7    3.26    0.84
  11   7   7    2.97    0.87
   7 -11   7    3.62    0.49
  -7  11  -8    6.87    0.69
  11   7  -8    7.81    1.26
  11   7   8    6.15    1.84
  11   7  -9    2.57    0.93
  11   7   9    2.84    0.82
  11   7 -10   22.20    2.22
  11   7  10   17.78    2.01
  11   7 -11    1.03    0.77
  11   7  11    5.58    1.23
  11   8   0   -0.59    0.48
  11   8  -1  667.55   10.77
  11   8   1  643.11   10.82
 -11  -8  -1  665.27   10.95
   8 -11   1  636.05    9.40
  11   8   2    7.21    0.94
  11   8  -2    8.84    0.96
   8 -11   2    7.01    0.65
 -11  -8  -2    8.87    1.01
  11   8   3  295.95    6.67
   8 -11   3  297.82    5.00
  11   8  -3  294.21    6.27
   8 -11   4    8.82    0.68
  11   8   4    8.69    1.09
  11   8  -4    9.12    1.02
  11   8   4   10.34    0.62
  11   8  -5  192.73    5.01
  11   8   5  193.20    3.48
   8 -11   5  197.58    3.83
  11   8   5  190.36    5.45
  11   8   6    7.57    1.14
   8 -11   6    8.22    0.72
  11   8   7   38.57    2.55
   8 -11   7   41.66    1.71
  11   8  -8    8.28    1.29
  11   8   8    5.93    1.18
   8 -11   8    7.70    0.80
  11   8  -9   38.39    2.79
  11   8   9   31.51    2.50
  11   8 -10    1.58    0.92
  11   8  10   -0.16    0.66
  11   8 -11   46.06    3.34
  11   8  11   46.42    3.33
  11   9   0    1.74    0.51
  11   9  -1    5.32    0.81
 -11  -9  -1    4.71    0.78
   9 -11   1    4.47    0.60
  11   9   1    3.99    0.70
 -11  -9  -2   26.71    1.78
  11   9  -2   24.87    1.61
   9 -11   2   27.18    1.33
  11   9   2   25.89    1.75
  11   9  -3   16.22    1.31
   9 -11   3   16.74    1.05
  11   9   3   17.75    1.53
  11   9  -4    8.84    1.01
   9 -11   4    8.75    0.75
  11   9   4    7.95    1.08
  11   9   5   15.73    1.55
  11   9  -5   16.73    1.39
  11   9   5   17.07    0.92
   9 -11   5   17.13    1.04
  11   9  -6    3.36    0.74
  11   9   6    3.94    0.50
   9 -11   6    3.08    0.49
  11   9   6    3.40    0.75
   9 -11   7    0.36    0.31
  11   9   7    0.27    0.61
   9 -11   8    0.99    0.45
  11   9   8   -0.08    0.69
  11   9  -9   13.83    1.77
  11   9   9   12.63    1.70
   9 -11   9   12.28    1.10
  11   9 -10    0.95    0.87
  11   9  10    1.07    0.89
  11   9 -11    6.52    1.44
  11   9  11    6.01    1.39
  11  10   0   -0.42    0.39
  11  10  -1    4.11    0.75
 -11 -10  -1    2.75    0.66
  10 -11   1    3.53    0.57
  11  10   1    4.33    0.76
  11  10  -2    3.69    0.72
  10 -11   2    4.55    0.66
  11  10   2    3.78    0.82
  11  10  -3    0.49    0.38
  10 -11   3    0.33    0.34
  11  10   3    0.76    0.58
  11  10  -4   23.67    1.59
  10 -11   4   24.45    1.31
  11  10   4   20.52    1.68
  10 -11   5   18.15    1.16
  11  10  -5   21.51    1.54
  11  10   5   19.33    1.06
  11  10   5   19.48    1.72
  10 -11   6    1.04    0.45
  11  10  -6   -0.24    0.36
  11  10   6    0.58    0.30
  11  10   6    1.60    0.71
  11  10  -7    4.09    0.78
  10 -11   7    4.09    0.64
  11  10   7    4.82    1.06
  10 -11   8   15.09    1.20
  11  10   8   14.59    1.75
  11  10   9    0.80    0.66
  11  10 -10   13.25    1.85
  11  10  10   14.75    1.90
  11  10 -11    2.64    1.35
  11 -11   0  208.44    4.93
  11  11   0  207.86    5.23
 -11 -11  -1   61.63    2.72
  11 -11   1   60.02    2.35
  11  11  -1   62.15    2.63
  11  11   1   64.95    2.77
  11 -11   2  150.19    3.80
  11  11   2  148.54    4.52
  11  11  -2  148.14    4.20
  11 -11   3    0.82    0.44
  11  11  -3    0.05    0.44
  11  11   3    0.13    0.43
  11  11  -4   46.41    2.24
  11 -11   4   42.00    1.87
  11  11   4   46.64    2.60
  11  11  -5   52.25    2.42
  11 -11   5   53.26    2.12
  11  11   5   50.89    2.87
  11  11  -6   94.27    3.43
  11  11   6   95.34    2.77
  11  11   6   96.97    4.10
  11 -11   6   95.08    2.99
  11  11  -7   -0.11    0.39
  11  11   7    1.05    0.63
  11 -11   7    0.48    0.43
  11  11  -8   47.43    2.49
  11  11   8   46.82    3.08
  11 -11   8   48.11    2.22
  11  11   9   -0.91    0.83
  11  11 -10   10.91    1.60
  11  11  10   10.13    1.67
  12 -11   0   -0.23    0.37
  11  12   0   -0.15    0.41
  12 -11   1  161.27    4.24
  11  12  -1  155.29    4.40
  11  12   1  164.00    4.66
  12 -11   2    0.13    0.40
  11  12   2    0.23    0.43
  11  12  -2    0.18    0.38
  11  12  -3   98.88    3.35
  12 -11   3   98.78    3.11
  11  12   3   88.07    3.48
  11  12  -4    4.05    0.76
  11  12   4    4.13    0.94
  12 -11   4    4.15    0.65
  11  12  -5  112.64    3.66
  12 -11   5  114.40    3.40
  11  12   5  121.12    4.51
  11  12  -6    2.63    0.61
  12 -11   6    1.86    0.51
  11  12   6    1.71    0.63
  11  12  -7   87.10    3.31
  12 -11   7   82.84    2.98
  11  12   7   95.54    4.26
  11  12  -8    3.28    0.72
  11  12   8    1.27    0.65
  12 -11   8    2.58    0.61
  11  12  -9   23.72    1.82
  11  12   9   25.56    2.43
  12 -10   0    9.15    1.03
  10  12   0   10.16    1.05
 -10 -12  -1   85.51    3.13
  12 -10   1   86.02    2.97
  10  12   1   87.22    3.18
  10  12  -1   70.51    2.01
  12 -10   2   18.38    1.30
 -10 -12  -2   17.89    1.45
  10  12  -2   18.69    1.37
  10  12   2   19.24    1.52
  12 -10   3   28.85    1.64
  10  12  -3   32.74    1.78
  10  12   3   30.73    2.02
  10  12  -4   -0.20    0.31
  12 -10   4    0.74    0.47
  10  12   4    0.53    0.59
  10  12  -5   16.13    1.29
  12 -10   5   16.68    1.28
  10  12   5   17.93    1.69
  12 -10   6    1.23    0.55
  10  12  -6    0.42    0.38
  10  12   6    0.18    0.33
  10  12   6   -0.20    0.55
  10  12  -7    3.42    0.72
  12 -10   7    4.00    0.74
  10  12   7    3.77    1.01
  10  12  -8    4.76    0.85
  10  12   8    3.90    1.09
  12 -10   8    2.73    0.66
  10  12  -9   19.56    1.59
  12 -10   9   23.79    1.75
  10  12   9   24.81    2.36
  10  12  10    0.26    0.71
  -9 -12   0    0.21    0.42
  12  -9   0    0.70    0.51
   9  12   0    0.79    0.49
  12  -9   1   -0.11    0.35
  -9 -12  -1   -0.21    0.46
   9  12  -1   -0.22    0.32
   9  12   1    0.21    0.43
  -9 -12  -2    0.84    0.40
  12  -9   2    0.28    0.36
   9  12   2   -0.14    0.37
   9  12  -2    0.18    0.35
  12  -9   3   22.62    1.47
   9  12  -3   26.28    1.51
   9  12   3   22.44    1.68
  12  -9   4   39.29    1.94
   9  12  -4   41.18    1.91
   9  12   4   40.04    2.33
   9  12  -5    5.12    0.73
  12  -9   5    5.96    0.79
   9  12   5    4.58    0.93
   9  12  -6   17.41    1.29
  12  -9   6   16.93    1.36
   9  12   6   17.64    1.69
  12  -9   7    0.18    0.42
   9  12  -7    0.28    0.37
   9  12   7    0.30    0.37
   9  12   7    0.72    0.57
   9  12  -8   10.45    1.10
   9  12   8   14.16    1.74
  12  -9   8   11.44    1.18
   9  12  -9    0.21    0.40
  12  -9   9    1.10    0.61
   9  12   9   -0.68    0.71
  12  -9  10    7.48    1.09
   9  12  10    5.75    1.23
  -8 -12   0  209.69    4.80
  12  -8   0  211.55    5.11
   8  12   0  222.01    4.92
  12  -8   1   30.56    1.73
  -8 -12  -1   28.76    1.64
   8  12  -1   28.88    1.56
   8  12   1   29.10    1.66
  -8 -12  -2  159.26    4.28
  12  -8   2  152.17    4.06
   8  12  -2  152.75    3.75
   8  12   2  158.86    4.33
  -8 -12  -3   11.16    1.14
  12  -8   3    9.98    1.01
   8  12  -3   10.52    0.93
   8  12   3   12.01    1.18
   8  12  -4  164.89    3.92
  12  -8   4  160.01    4.21
   8  12   4  159.60    4.78
   8  12  -5    7.14    0.79
  12  -8   5    7.19    0.86
   8  12   5    8.40    1.14
   8  12  -6  154.55    3.84
  12  -8   6  146.26    4.19
   8  12   6  147.21    4.95
  12  -8   7    0.10    0.48
   8  12  -7    0.67    0.43
 -12   8  -7    0.44    0.45
   8  12   7    0.14    0.36
   8  12   7    0.82    0.59
   8  12  -8   33.59    1.85
   8  12   8   37.27    2.69
  12  -8   8   33.94    2.07
   8  12   9    0.25    0.72
  12  -8   9   -0.73    0.54
   8  12  10   41.91    3.08
  12  -8  10   36.93    2.38
   8  12  11    3.20    1.16
  12  -8  11    0.33    0.53
  -7 -12   0    0.11    0.25
  12  -7   0   -0.31    0.41
   7  12   0    0.10    0.29
  12  -7   1  205.63    4.87
  -7 -12  -1  199.59    4.59
   7  12  -1  199.30    4.33
   7  12   1  198.87    4.62
  12  -7   2    6.64    0.85
  -7 -12  -2    8.30    0.91
   7  12  -2    8.04    0.79
   7  12   2    6.79    0.86
  -7 -12  -3  176.79    4.69
   7  12  -3  184.71    3.94
  12  -7   3  176.81    4.49
   7  12   3  180.56    4.76
  12  -7   4    3.56    0.64
   7  12  -4    4.19    0.55
  -7 -12  -4    4.50    0.80
 -12   7   4    6.16    0.95
   7  12   4    3.60    0.73
   7  12  -5   48.52    1.86
  12  -7   5   44.97    2.18
   7  12   5   48.04    2.56
   7  12  -6    4.53    0.63
 -12   7  -6    3.53    0.67
  12  -7   6    4.45    0.78
   7  12   6    4.95    0.99
   7  12  -7  156.75    3.84
 -12   7  -7  151.28    4.46
   7  12   7  149.44    4.30
   7  12   7  160.57    5.33
  12  -7   7  149.69    4.41
   7  12  -8    0.04    0.33
   7  12   8   -0.08    0.38
  12  -7   8    0.41    0.49
   7  12   8    0.07    0.67
   7  12   9   22.93    2.19
  12  -7   9   20.28    1.68
  12  -7  10    0.71    0.68
   7  12  10    0.32    0.71
  12  -7  11   13.41    1.59
  12  -7  12    0.22    0.57
  -6 -12   0   27.74    1.41
  12  -6   0   27.64    1.69
   6  12   0   27.80    1.39
  12  -6   1   12.31    1.12
  -6 -12  -1   11.57    0.97
   6  12  -1   11.74    0.89
   6  12   1   13.33    1.06
  12  -6   2   26.91    1.61
   6  12  -2   29.53    1.36
  -6 -12  -2   30.60    1.67
   6  12   2   28.19    1.62
  -6 -12  -3   16.94    1.31
  12  -6   3   16.89    1.31
   6  12  -3   18.02    1.02
 -12   6   3   18.28    1.38
   6  12   3   18.61    1.41
  12  -6   4   36.95    1.93
   6  12  -4   38.61    1.51
  -6 -12  -4   41.91    2.17
 -12   6   4   38.94    2.13
   6  12   4   38.02    2.13
   6  12  -5   35.66    1.46
  12  -6   5   33.87    1.89
   6  12   5   33.07    2.10
   6  12  -6    1.15    0.37
 -12   6  -6    0.06    0.43
  12  -6   6   -0.38    0.46
   6  12   6    0.20    0.52
  12  -6   7    9.47    1.11
   6  12  -7    7.69    0.77
   6  12   7    9.16    1.07
   6  12   7    9.11    1.35
  12  -6   8    3.50    0.78
   6  12   8    2.70    0.86
  12  -6   9    6.22    1.02
   6  12   9    8.20    1.34
  12  -6  10    2.24    0.78
 -12   6 -11   13.72    1.52
  12  -6  11   13.74    1.58
  12  -6  12   -0.52    0.66
  12  -5   0   -0.25    0.42
  -5 -12   0    0.16    0.25
   5  12   0    0.59    0.33
  -5 -12   1   21.82    1.13
  -5 -12  -1   23.54    1.30
  12  -5   1   23.15    1.50
   5  12  -1   23.58    1.16
   5  12   1   24.01    1.35
  -5 -12  -2   16.80    1.18
   5  12  -2   15.46    0.90
  12  -5   2   14.49    1.20
 -12   5   2   17.45    1.25
   5  12   2   14.82    1.17
   5  12  -3    5.21    0.52
  -5 -12  -3    4.54    0.69
  12  -5   3    4.48    0.72
 -12   5   3    4.89    0.78
   5  12   3    6.32    0.85
  -5 -12  -4  130.31    3.95
   5  12  -4  132.57    2.77
  12  -5   4  124.88    3.73
 -12   5   4  131.85    4.03
   5  12   4  121.68    3.87
  12  -5   5    3.92    0.71
  -5 -12  -5    5.76    0.87
   5  12  -5    4.15    0.48
 -12   5  -5    4.21    0.73
 -12   5   5    4.37    0.81
   5  12   5    3.30    0.76
 -12   5  -6    1.74    0.53
   5  12  -6    2.56    0.40
  12  -5   6    2.14    0.64
   5  12   6    2.04    0.77
   5  12  -7    0.65    0.35
  12  -5   7    0.30    0.44
   5  12   7    0.16    0.53
   5  12   8    9.34    1.34
   5  12  -8    9.37    0.83
  12  -5   8    9.05    1.14
  12  -5   9    2.01    0.66
 -12   5 -10   10.66    1.20
  12  -5  10    9.79    1.34
  12  -5  11   -0.12    0.71
  12  -5  12    4.25    1.08
  12  -5  13    0.13    0.64
  12  -4   0  295.83    6.25
  -4 -12   0  296.50    5.13
   4  12   0  308.81    5.32
  -4 -12  -1    0.45    0.31
  -4 -12   1    0.65    0.29
  12  -4   1    0.94    0.45
   4  12   1    0.63    0.34
   4  12  -1    0.32    0.22
  -4 -12  -2  618.00    9.52
  12  -4   2  603.35   10.03
 -12   4   2  608.35    9.66
   4  12  -2  598.47    8.24
   4  12   2  619.10    9.64
  -4 -12  -3    0.21    0.31
   4  12  -3    0.01    0.20
  12  -4   3    0.78    0.47
 -12   4   3    0.23    0.31
   4  12   3    0.17    0.37
   4  12  -4  168.37    2.96
  12  -4   4  161.50    4.37
  -4 -12  -4  165.52    4.46
 -12   4  -4  174.90    4.61
   4  12   4  167.35    4.58
 -12   4   4  168.30    4.57
  -4 -12  -5    0.14    0.38
  12  -4   5    0.69    0.45
   4  12  -5    0.33    0.20
 -12   4  -5   -0.46    0.40
 -12   4   5    0.25    0.38
   4  12   5   -0.54    0.56
  12  -4   6  102.25    3.57
   4  12  -6  107.53    2.37
 -12   4  -6  101.70    3.59
   4  12   6  100.65    3.83
   4  12  -7    1.91    0.37
  12  -4   7    2.62    0.72
   4  12   7    1.21    0.68
   4  12  -7    2.36    0.42
   4  12  -8  103.53    2.80
  12  -4   8  102.86    3.84
 -12   4  -9    0.62    0.38
  12  -4   9   -0.17    0.49
 -12   4 -10   53.25    2.59
  12  -4  10   50.03    2.89
  12  -4  11    0.68    0.57
  12  -4  12    9.15    1.49
  12  -4  13    0.68    0.75
  -3 -12   0    0.31    0.25
  12  -3   0    0.23    0.37
 -12   3   0    0.08    0.25
   3  12   0    0.82    0.33
  -3 -12  -1  194.42    3.97
  -3 -12   1  192.26    3.42
  12  -3  -1  184.10    4.83
  12  -3   1  194.23    4.73
 -12   3   1  190.88    4.09
   3  12   1  197.01    4.11
   3  12  -1  199.27    3.52
  -3 -12  -2    0.83    0.36
  12  -3   2    1.46    0.50
 -12   3   2    0.77    0.42
   3  12  -2    1.06    0.22
   3  12   2    0.88    0.31
  12  -3   3  233.71    5.46
  -3 -12  -3  235.50    5.17
   3  12   3  274.16    5.81
 -12   3   3  239.62    5.30
   3  12  -3  244.01    3.57
  12  -3   4   11.12    1.11
  -3 -12  -4   10.79    1.07
   3  12  -4   10.29    0.47
 -12   3  -4    8.73    1.00
 -12   3   4   10.96    1.10
   3  12   4   10.88    1.09
   3  12  -5   50.10    1.20
  -3 -12  -5   51.74    2.47
  12  -3   5   45.76    2.27
 -12   3  -5   53.49    2.47
   3  12  -5   49.69    1.24
   3  12   5   44.89    2.35
 -12   3   5   49.01    2.46
   3  12  -6    0.12    0.19
  12  -3   6    0.52    0.43
   3  12   6    0.64    0.51
   3  12  -6    0.36    0.20
   3  12  -7   54.92    1.61
   3  12  -7   54.79    1.64
  12  -3   7   51.21    2.57
 -12   3  -8    0.44    0.36
   3  12  -8    0.38    0.29
  12  -3   8   -0.27    0.58
 -12   3  -9   28.44    1.69
  12  -3   9   25.89    2.05
 -12   3 -10   -0.29    0.46
  12  -3  10    0.46    0.54
  12  -3  11    7.36    1.29
  12  -3  12    6.03    1.30
  12  -3  13    2.15    0.82
  -2 -12   0  112.68    2.51
  12  -2   0  112.43    3.51
 -12   2   0  112.46    2.65
   2  12   0  121.08    2.72
  -2 -12  -1    0.27    0.26
  -2 -12   1    0.18    0.15
  12  -2   1   -0.52    0.42
  12  -2  -1    0.40    0.42
 -12   2  -1    0.33    0.21
 -12   2   1    0.09    0.22
   2  12   1    0.04    0.27
   2  12  -1    0.42    0.20
  -2 -12  -2   12.89    0.96
  12  -2   2   11.72    1.12
   2  12  -2   13.51    0.57
 -12   2   2   11.94    0.97
   2  12   2   12.70    0.99
  -2 -12  -3    4.54    0.66
  12  -2   3    4.58    0.79
 -12   2  -3    3.38    0.70
 -12   2   3    4.56    0.68
   2  12   3    3.56    0.61
  -2 -12  -4   -0.07    0.39
  12  -2   4    0.88    0.53
 -12   2  -4    0.04    0.33
 -12   2   4    0.44    0.37
   2  12   4   -0.15    0.47
 -12   2  -5   44.83    2.28
  12  -2   5   44.14    2.25
  -2 -12  -5   43.18    2.20
   2  12  -6    1.05    0.19
  12  -2   6    0.02    0.44
   2  12  -6    1.10    0.19
  12  -2   7    0.36    0.63
 -12   2  -7    1.38    0.37
   2  12  -7    1.62    0.27
 -12   2  -8   13.00    1.02
  12  -2   8   14.15    1.46
   2  12  -8   12.73    0.79
 -12   2  -9   13.16    1.11
  12  -2   9   13.82    1.56
 -12   2 -10    0.95    0.43
  12  -2  10   -0.63    0.62
  12  -2  11   36.22    2.66
  12  -2  12    0.18    0.65
  12  -2  13    8.79    1.56
  -1 -12   0    0.25    0.18
 -12   1   0    0.17    0.21
  12  -1   0    0.98    0.60
  -1 -12  -1   30.24    1.29
 -12   1  -1   29.42    1.02
 -12   1   1   27.78    1.31
  12  -1   1   32.59    1.80
  12  -1  -1   29.68    1.76
  -1 -12   1   30.55    0.91
  12  -1   2   16.94    1.31
  -1 -12  -2   15.06    1.02
 -12   1  -2   15.32    0.60
 -12   1   2   14.06    1.04
 -12   1  -3   28.82    1.78
  12  -1   3   31.39    1.83
  -1 -12  -3   28.24    1.52
  -1 -12  -4    9.57    0.98
  12  -1   4    9.24    1.06
 -12   1  -4   10.32    1.06
  12  -1   5    3.60    0.70
  -1 -12  -5    4.06    0.79
 -12   1  -5    3.32    0.33
 -12   1  -5    4.00    0.74
  12  -1   6    6.62    0.92
 -12   1  -6    8.51    0.59
   1  12  -7    2.65    0.27
  12  -1   7    2.65    0.74
 -12   1  -7    2.49    0.41
   1  12  -8    4.95    0.46
 -12   1  -8    5.07    0.63
  12  -1   8    5.77    1.03
 -12   1  -9   13.48    1.05
  12  -1   9   13.25    1.53
 -12   1 -10    6.88    0.86
  12  -1  10    7.79    1.34
  12  -1  11    1.10    0.69
  12  -1  12    3.14    0.98
  12  -1  13   -0.70    0.69
  12   0   0  798.49   12.36
   0 -12   0  792.69   10.26
  12   0   1    7.67    0.95
   0 -12   1    7.90    0.41
  12   0  -1    7.63    0.91
   0 -12  -1    8.67    0.68
  12   0   2  403.05    7.68
   0 -12  -2  397.64    6.70
  12   0   3    0.74    0.39
 -12   0  -3    0.43    0.32
   0 -12  -3    0.55    0.40
 -12   0  -4  331.24    6.91
  12   0   4  306.31    6.70
   0 -12  -4  305.98    6.37
  12   0   5    2.04    0.66
   0 -12  -5    2.25    0.59
  12   0   6  142.87    4.45
   0  12  -7    0.32    0.12
  12   0   7    0.26    0.51
   0  12  -8   57.89    1.51
  12   0   8   54.79    2.91
  12   0   9    0.40    0.62
  12   0  10   71.32    3.63
  12   0  11    2.07    0.83
  12   0  12   13.10    1.80
  12   0  13    0.96    0.84
  12   1   0   -0.26    0.46
   1 -12   0   -0.10    0.18
  12   1   1  111.36    3.51
  12   1  -1  111.88    3.55
   1 -12   1  115.30    1.86
   1 -12  -1  114.59    2.70
  12   1  -2    3.20    0.66
 -12  -1  -2    3.45    0.64
  12   1   2    2.28    0.59
   1 -12  -2    1.94    0.41
 -12  -1  -3   90.61    3.23
  12   1   3   83.20    3.10
   1 -12  -3   84.33    2.77
 -12  -1  -4   15.82    1.38
  12   1   4   18.38    1.47
   1 -12  -4   16.04    1.27
  12   1   5   64.42    2.85
  12   1  -5   70.30    2.81
   1 -12  -5   71.13    2.90
  12   1   6    2.12    0.65
  12   1  -6    2.05    0.61
  12   1   7    1.25    0.63
  12   1  -7    2.84    0.73
  -1  12  -8    5.94    0.44
  12   1  -8    5.05    0.98
  12   1   8    4.88    0.99
  12   1  -9   25.03    2.15
  12   1   9   27.31    2.17
  12   1  10    9.16    1.41
  12   1  11   12.45    1.61
  12   1  12    1.96    0.87
  12   2   0   13.40    1.18
   2 -12   0   14.79    0.77
  12   2  -1    3.80    0.73
  12   2   1    3.31    0.68
   2 -12   1    3.24    0.26
   2 -12  -1    2.65    0.45
 -12  -2  -2  176.34    4.65
  12   2  -2  169.29    4.57
  12   2   2  169.93    4.58
   2 -12  -2  162.62    3.79
  12   2   3    0.08    0.42
 -12  -2  -3    0.04    0.32
  12   2  -3    0.50    0.34
   2 -12  -3    0.20    0.34
  12   2   4   27.04    1.80
 -12  -2  -4   30.80    1.91
  12   2  -4   29.80    1.68
   2 -12  -4   25.27    1.60
  12   2   5   16.76    1.47
  12   2  -5   17.53    1.41
   2 -12  -5   17.28    1.42
  12   2   6    4.63    0.88
  12   2  -6    5.58    0.90
  12   2   7    9.35    1.24
  12   2  -7   10.99    1.32
  -2  12  -8    0.62    0.21
  12   2  -8    0.30    0.47
  12   2   8    0.85    0.79
  12   2  -9   23.43    2.11
  12   2   9   22.78    2.01
  12   2 -10    1.41    0.72
  12   2  10    1.68    0.82
  12   2 -11   14.56    1.87
  12   2  11   15.21    1.81
  12   2 -12    2.88    0.96
  12   2  12    4.31    1.13
  12   3   0    0.07    0.42
   3 -12   0   -0.17    0.24
  12   3   1   86.97    3.12
  12   3  -1   79.03    2.95
  12   3  -1   79.08    2.10
   3 -12   1   80.37    1.63
   3 -12  -1   83.24    2.33
  12   3   2   57.41    2.54
 -12  -3  -2   62.05    2.65
  12   3  -2   57.75    2.52
  12   3  -2   59.69    2.04
   3 -12  -2   54.34    2.07
  12   3   3   23.37    1.63
 -12  -3  -3   24.65    1.66
  12   3  -3   21.57    1.59
  12   3  -3   24.48    1.42
   3 -12  -3   24.52    1.50
  12   3   4    0.19    0.52
  12   3  -4    0.13    0.42
   3 -12  -4    0.43    0.37
  12   3   5   38.74    2.27
  12   3  -5   37.22    2.05
   3 -12  -5   39.03    2.19
  12   3  -6   19.97    1.62
  12   3   6   18.04    1.59
  12   3  -7   34.16    2.24
  12   3   7   36.58    2.34
  -3  12  -8    8.01    0.51
  12   3  -8    7.60    1.20
  12   3   8    8.52    1.28
  12   3  -9    1.79    0.78
  12   3   9    1.32    0.74
  12   3 -10    2.12    0.82
  12   3  10    4.01    1.03
  12   3 -11    6.04    1.32
  12   3  11    4.98    1.14
  12   3 -12    4.23    1.24
  12   3  12    4.81    1.28
  12   4   0  475.51    6.51
   4 -12   0  470.56    7.06
  12   4   0  461.33    8.58
  12   4   1   71.59    2.85
   4 -12  -1   69.59    2.23
  12   4  -1   70.85    2.04
   4 -12   1   74.05    1.71
  12   4  -1   73.33    2.82
  12   4   2  389.37    7.72
   4 -12  -2  385.53    6.95
  12   4  -2  389.00    6.59
  12   4  -2  384.84    7.61
 -12  -4  -2  407.40    7.87
  12   4   3   45.44    2.33
  12   4  -3   48.53    2.04
   4 -12  -3   51.22    2.32
 -12  -4  -3   47.61    2.40
  12   4  -3   46.60    2.34
  12   4   4  403.71    8.27
  12   4  -4  419.05    7.78
   4 -12  -4  433.66    8.27
  12   4   5   -0.48    0.53
  12   4  -5    0.53    0.40
   4 -12  -5    0.00    0.42
  12   4  -6   88.26    3.46
  12   4   6   82.86    3.44
  12   4   7    1.99    0.76
  12   4  -7    1.82    0.67
  -4  12  -8   79.47    1.84
  12   4  -8   85.47    3.82
  12   4   8   76.19    3.64
  12   4  -9    3.93    0.94
  12   4   9    3.53    0.89
  12   4 -10   39.28    2.85
  12   4  10   39.83    2.83
  12   4 -11   -1.04    0.87
  12   4  11    0.49    0.67
  12   4 -12   10.63    1.71
  12   4  12    7.56    1.51
  12   5   0    0.40    0.24
  12   5   0   -0.01    0.42
  12   5   1   64.04    2.70
  12   5  -1   59.76    2.59
  12   5   1   65.57    1.32
  12   5  -1   65.34    2.02
  12   5   2   10.34    1.14
   5 -12   2   11.10    0.52
 -12  -5  -2    8.83    1.04
  12   5  -2   11.50    1.17
  12   5  -2   11.50    0.92
   5 -12  -2    8.95    0.88
  12   5   3    4.99    0.87
  12   5  -3    5.54    0.83
  12   5  -3    5.39    0.68
   5 -12  -3    5.25    0.78
  12   5   4   20.49    1.64
  12   5  -4   14.72    1.36
  12   5  -4   16.60    1.34
   5 -12  -4   16.56    1.38
  12   5   5   -0.26    0.47
  12   5  -5    0.27    0.44
   5 -12  -5   -0.48    0.43
  12   5   6    6.04    1.01
  12   5  -6    5.99    0.95
  12   5  -7   21.97    1.86
  12   5   7   20.86    1.87
  12   5  -8    1.81    0.82
  12   5   8    1.20    0.70
  12   5  -9   18.21    1.88
  12   5   9   22.67    2.10
  12   5 -10    8.61    1.40
  12   5  10    7.70    1.36
  12   5 -11   -0.99    0.78
  12   5  11    0.25    0.77
  12   6   0    5.49    0.82
  12   6   1   41.63    2.19
  12   6   1   40.55    1.19
  12   6  -1   43.45    2.19
 -12  -6  -1   44.24    2.24
  12   6   2  117.34    3.83
  12   6  -2  112.23    3.65
 -12  -6  -2  122.16    3.92
   6 -12   2  120.28    2.34
   6 -12   3   12.22    0.56
  12   6   3   12.81    1.32
  12   6  -3   11.24    1.15
  12   6  -3   12.11    1.06
  12   6   4   30.00    2.00
  12   6  -4   30.12    1.87
   6 -12  -4   30.97    1.91
  12   6  -4   29.82    1.82
   6 -12   4   30.73    0.86
  12   6   5    2.42    0.69
  12   6  -5    2.63    0.68
   6 -12  -5    2.12    0.63
   6 -12   5    1.97    0.24
  12   6   6    1.34    0.60
  12   6  -6    0.94    0.58
  12   6  -7    1.18    0.58
  12   6   7    1.14    0.60
  12   6  -8    0.36    0.54
  12   6   8    1.14    0.72
  12   6  -9   17.61    1.87
  12   6   9   19.37    1.98
  12   6 -10    1.56    0.92
  12   6  10    1.34    0.79
  12   6 -11   20.02    2.19
  12   6  11   18.23    2.15
  12   7   0    0.23    0.42
   7 -12   1  123.74    2.84
 -12  -7  -1  133.38    4.09
  12   7  -1  123.11    3.83
  12   7   1  125.84    3.95
   7 -12   2    7.77    0.59
  12   7  -2    7.70    1.01
  12   7   2    5.59    0.85
  12   7  -3  125.93    3.93
   7 -12   3  134.04    2.60
  12   7   3  127.67    4.18
  12   7  -4    0.00    0.44
  12   7   4    0.26    0.47
   7 -12   4    0.12    0.16
  12   7   5    9.19    1.18
  12   7  -5    6.10    0.90
  12   7  -5    8.36    1.07
   7 -12   5    8.08    0.55
  12   7   6   10.36    1.32
   7 -12   6   11.38    0.72
  12   7  -6   10.30    1.29
  12   7  -7    6.71    1.16
  12   7   7    4.89    1.00
  12   7  -8    0.28    0.56
  12   7   8   -1.57    0.77
  12   7  -9   28.86    2.45
  12   7   9   29.05    2.40
  12   7 -10    0.03    0.64
  12   7  10   -0.79    0.67
  12   7 -11    6.59    1.36
  12   7  11    6.68    1.36
  12   8   0  402.16    7.94
  12   8   1    1.60    0.56
   8 -12   1    1.56    0.39
  12   8  -1    1.02    0.53
 -12  -8  -1    2.35    0.67
  12   8   2  327.29    7.17
  12   8  -2  327.85    6.92
   8 -12   2  333.02    5.45
  12   8   3   -0.09    0.52
   8 -12   3    0.51    0.23
  12   8  -3    0.79    0.40
  12   8   4  175.50    5.20
   8 -12   4  179.28    3.43
  12   8  -4  174.86    4.83
  12   8   4  184.38    2.88
  12   8  -5   12.65    1.27
  12   8   5   11.02    1.26
   8 -12   5   13.37    0.80
  12   8  -6   19.56    1.63
  12   8   6   22.39    1.92
   8 -12   6   21.59    1.06
  12   8  -7   -0.10    0.59
  12   8   7   -0.47    0.63
   8 -12   7    0.53    0.31
  12   8  -8   58.15    3.31
  12   8   8   57.79    3.33
  12   8  -9    1.83    0.91
  12   8   9    1.35    0.92
  12   8 -10   48.26    3.29
  12   8  10   43.75    3.15
  12   8 -11    1.70    0.96
  12   9   0    0.54    0.42
  12   9   1   -0.33    0.40
   9 -12   1   -0.11    0.30
  12   9  -1    0.36    0.49
  12   9   2   62.23    2.83
  12   9  -2   59.95    2.62
   9 -12   2   59.21    1.98
  12   9   3    0.14    0.48
  12   9  -3    0.11    0.40
   9 -12   3    0.19    0.27
   9 -12   4   11.79    0.84
  12   9   4   13.04    1.40
  12   9   4   12.29    0.69
  12   9  -4   13.16    1.26
   9 -12   5    0.11    0.27
  12   9   5   -0.19    0.64
  12   9  -5   -0.03    0.40
  12   9   5    0.67    0.26
  12   9  -6    1.67    0.60
   9 -12   6    1.95    0.43
  12   9   6    0.31    0.51
  12   9  -7   -0.15    0.46
  12   9   7    0.48    0.55
   9 -12   7    0.31    0.34
  12   9  -8    2.09    0.75
  12   9   8    0.42    0.65
  12   9  -9   -0.12    0.66
  12   9   9    0.89    0.70
  12   9 -10   10.59    1.67
  12   9  10   10.52    1.58
  12   9 -11   -0.08    0.72
  12  10   0    2.68    0.71
  10 -12   1   78.92    2.57
  12  10   1   78.66    3.17
  12  10  -1   77.21    3.05
  10 -12   2   13.68    0.99
  12  10  -2   15.03    1.31
  12  10   2   13.68    1.37
  12  10  -3    0.38    0.40
  10 -12   3    0.98    0.36
  12  10   3    1.17    0.64
  12  10  -4   19.40    1.52
  10 -12   4   21.38    1.22
  12  10   4   21.77    1.75
  12  10   5    0.68    0.50
  10 -12   5    1.07    0.41
  12  10  -5    1.59    0.63
  12  10   5    0.94    0.24
  12  10  -6    3.80    0.79
  12  10   6    3.51    1.04
  10 -12   6    2.70    0.50
  12  10  -7    6.54    1.02
  10 -12   7    8.07    0.82
  12  10   7    5.53    1.15
  12  10  -8    0.99    0.60
  12  10   8    0.08    0.69
  12  10  -9    8.65    1.47
  12  10   9    7.84    1.43
  12  10 -10    1.23    0.86
  12  10  10    4.52    1.25
  11 -12   0   -0.10    0.38
  12  11   0    1.27    0.56
  11 -12   1  133.29    3.63
  12  11  -1  135.45    4.17
  12  11   1  135.27    4.29
  11 -12   2   18.00    1.24
  12  11   2   18.27    1.59
  12  11  -2   18.32    1.46
  12  11  -3   35.26    2.06
  11 -12   3   32.68    1.62
  12  11   3   36.48    2.29
  12  11  -4   40.12    2.21
  11 -12   4   39.90    1.77
  12  11   4   37.78    2.40
  11 -12   5   61.01    2.24
  12  11  -5   59.01    2.70
  12  11   5   62.31    2.00
  12  11   5   62.32    3.22
  12  11  -6    0.80    0.53
  11 -12   6    0.67    0.36
  12  11   6    0.66    0.76
  12  11  -7   13.46    1.37
  11 -12   7   16.40    1.20
  12  11   7   14.69    1.75
  12  11  -8    1.61    0.50
  12  11   8    2.33    0.88
  12  11  -9   15.27    1.55
  12  11   9   12.48    1.83
  12  11 -10    1.18    0.98
  12 -12   0  189.86    4.84
  12  12   0  203.21    5.35
  12 -12   1    0.17    0.34
  12  12   1   -0.18    0.51
  12  12  -1    1.29    0.56
  12 -12   2   54.60    2.26
  12  12   2   53.03    2.75
  12  12  -2   53.48    2.54
  12  12  -3    0.28    0.42
  12 -12   3    0.14    0.37
  12  12   3   -0.73    0.63
  12  12  -4  112.72    3.78
  12 -12   4  107.61    3.24
  12  12   4  108.83    4.24
  12  12  -5    2.29    0.64
  12 -12   5    2.91    0.56
  12  12   5    1.78    0.68
  12  12  -6   49.54    2.49
  12  12   6   48.62    2.98
  12 -12   6   49.88    2.14
  12  12  -7    3.13    0.65
  12  12   7    5.40    1.22
  12 -12   7    4.52    0.72
  12  12  -8    9.62    1.17
  12  12   8   12.53    1.62
  12  12  -9    0.90    0.43
  12  12   9    3.10    0.99
  12  12 -10   21.31    2.41
  13 -12   0    0.80    0.60
  12  13   0   -0.21    0.42
  13 -12   1    3.02    0.68
  12  13   1    1.61    0.63
  12  13  -1    3.02    0.70
  13 -12   2    1.89    0.54
  12  13  -2    2.17    0.61
  12  13   2    2.66    0.77
  12  13  -3   38.32    2.17
  13 -12   3   36.70    1.94
  12  13   3   38.53    2.42
  12  13  -4    1.40    0.57
  12  13   4    2.27    0.76
  13 -12   4    2.58    0.64
  12  13  -5    0.33    0.42
  13 -12   5    0.46    0.32
  12  13   5    1.19    0.63
  12  13  -6    1.94    0.55
  13 -12   6    1.28    0.47
  12  13   6    3.64    0.97
  12  13  -7    1.02    0.56
  12  13   7    0.08    0.63
  12  13  -8    2.15    0.67
  12  13   8    0.48    0.72
  12  13   9   -0.21    0.81
  13 -11   0   -0.17    0.41
  11  13   0    0.32    0.43
  13 -11   1   -0.22    0.44
  11  13  -1    0.65    0.50
  11  13   1    0.26    0.45
  13 -11   2    3.00    0.61
  11  13  -2    1.51    0.50
  11  13   2    3.76    0.76
  11  13  -3   10.32    1.09
  13 -11   3   12.88    1.19
  11  13   3   11.22    1.31
  11  13  -4    6.49    0.87
  13 -11   4    6.78    0.87
  11  13   4    4.96    0.97
  11  13  -5    4.09    0.69
  13 -11   5    4.10    0.74
  11  13   5    5.95    1.14
  11  13  -6    2.04    0.60
  13 -11   6    2.56    0.65
  11  13   6    1.16    0.61
  11  13  -7   12.99    1.30
  13 -11   7   14.88    1.31
  11  13   7   12.66    1.66
  11  13  -8    7.83    1.03
  11  13   8    7.93    1.40
  11  13   9    2.25    0.92
  13 -10   0    0.26    0.44
  10  13   0   -0.08    0.37
  13 -10   1   35.09    1.94
 -10 -13  -1   33.40    1.96
  10  13  -1   37.34    1.98
  10  13   1   35.82    2.06
  13 -10   2   -0.06    0.34
  10  13   2    0.81    0.51
  10  13  -2   -0.46    0.49
  10  13  -3  152.98    4.13
  13 -10   3  154.98    4.24
  10  13   3  146.96    4.67
  10  13  -4    0.32    0.37
  13 -10   4   -0.35    0.34
  10  13   4   -0.62    0.58
  10  13  -5   74.15    2.77
  13 -10   5   72.53    2.81
  10  13   5   74.95    3.49
  10  13  -6    2.62    0.59
  13 -10   6    2.17    0.65
  10  13   6    2.12    0.74
  10  13  -7   48.70    2.28
  13 -10   7   43.65    2.26
  10  13   7   47.45    3.03
  10  13  -8   -0.36    0.45
  10  13   8    0.76    0.73
  13 -10   8    0.37    0.51
  13 -10   9   14.03    1.38
  10  13   9   12.17    1.73
  -9 -13   0   24.55    1.57
  13  -9   0   28.28    1.80
   9  13   0   27.06    1.65
  13  -9   1    7.51    0.94
  -9 -13  -1    7.14    0.86
   9  13   1    8.28    0.96
   9  13  -1    9.33    0.97
  13  -9   2   91.45    3.16
  -9 -13  -2   92.52    3.32
   9  13  -2   89.78    2.96
   9  13   2   94.15    3.39
  13  -9   3    0.04    0.40
   9  13  -3    0.77    0.40
   9  13   3    1.39    0.54
  13  -9   4  161.28    4.36
   9  13  -4  161.73    4.06
   9  13   4  160.02    4.95
   9  13  -5    0.89    0.44
  13  -9   5    0.81    0.53
   9  13   5    0.01    0.54
   9  13  -6   85.63    2.88
  13  -9   6   86.46    3.20
   9  13   6   80.67    3.73
   9  13  -7    0.18    0.33
  13  -9   7   -0.17    0.46
   9  13   7   -0.23    0.64
   9  13  -8   56.74    2.43
   9  13   8   49.51    3.21
  13  -9   8   54.76    2.66
   9  13   9    1.50    0.98
  13  -9   9    0.88    0.62
   9  13  10   29.48    2.62
  13  -9  10   23.65    1.89
  13  -8   0   -0.47    0.48
  -8 -13   0    0.59    0.41
   8  13   0    0.17    0.35
  13  -8   1   -0.16    0.42
  -8 -13  -1   -0.10    0.32
   8  13  -1    0.10    0.31
   8  13   1   -0.31    0.41
  13  -8   2    4.44    0.79
  -8 -13  -2    4.14    0.73
   8  13  -2    4.11    0.61
   8  13   2    4.95    0.85
  13  -8   3    4.63    0.79
  -8 -13  -3    5.29    0.85
   8  13  -3    4.02    0.59
   8  13   3    3.82    0.74
   8  13  -4    0.33    0.34
  13  -8   4    0.13    0.38
   8  13   4    0.15    0.47
   8  13  -5    4.96    0.70
  13  -8   5    6.44    0.92
   8  13   5    6.24    1.01
   8  13  -6   41.23    1.84
  13  -8   6   40.63    2.20
   8  13   6   41.58    2.60
  13  -8   7    6.51    0.94
   8  13  -7    8.38    0.88
   8  13   7    6.30    0.93
   8  13   7   10.01    1.43
   8  13  -8   15.39    1.19
  13  -8   8   14.30    1.42
   8  13   8   18.37    1.99
  13  -8   9    0.30    0.44
   8  13   9    1.76    0.87
  13  -8  10    3.49    0.85
   8  13  10    2.97    1.02
  -7 -13   0    5.64    0.71
  13  -7   0    5.16    0.81
   7  13   0    6.03    0.72
  13  -7   1   11.74    1.15
  -7 -13  -1   11.37    1.01
   7  13   1   11.81    1.06
   7  13  -1   13.40    1.03
  -7 -13  -2    0.10    0.30
  13  -7   2    0.81    0.40
   7  13  -2    0.29    0.30
   7  13   2    0.25    0.39
  13  -7   3   18.67    1.42
   7  13  -3   18.59    1.12
  -7 -13  -3   19.53    1.49
 -13   7   3   18.29    1.48
   7  13   3   19.14    1.50
   7  13  -4    6.18    0.68
  13  -7   4    6.31    0.85
   7  13   4    7.00    1.01
   7  13  -5   10.22    0.85
  13  -7   5   10.46    1.11
   7  13   5   11.07    1.28
   7  13  -6    1.10    0.42
  13  -7   6    0.39    0.43
   7  13   6    1.18    0.61
   7  13  -7   39.43    1.73
   7  13   7   45.20    2.84
  13  -7   7   34.36    2.02
   7  13  -8    1.89    0.50
  13  -7   8    1.79    0.66
   7  13   8    1.68    0.90
  13  -7   9    4.58    0.96
   7  13   9    3.65    0.93
  13  -7  10   -0.28    0.59
   7  13  10   -0.16    0.69
  13  -7  11    3.93    0.96
  13  -6   0   -0.03    0.40
  -6 -13   0   -0.04    0.25
   6  13   0   -0.01    0.35
  -6 -13  -1  162.98    3.99
  13  -6   1  163.89    4.44
   6  13   1  169.58    4.13
   6  13  -1  163.80    3.67
  13  -6   2   32.57    1.87
   6  13  -2   34.06    1.46
  -6 -13  -2   33.81    1.77
   6  13   2   31.31    1.76
  13  -6   3  197.64    5.04
  -6 -13  -3  206.30    5.07
   6  13  -3  213.02    4.07
 -13   6   3  206.38    5.18
   6  13   3  211.00    5.20
  13  -6   4   23.15    1.60
   6  13  -4   23.87    1.16
  -6 -13  -4   22.82    1.65
 -13   6   4   21.24    1.62
   6  13   4   22.91    1.69
   6  13  -5  113.44    2.73
  13  -6   5  106.79    3.62
   6  13   5  106.54    3.96
   6  13  -6    9.79    0.76
  13  -6   6    8.21    1.05
   6  13   6   10.50    1.32
   6  13  -7  130.66    3.14
   6  13   7  137.36    4.95
  13  -6   7  115.00    3.94
   6  13  -8    0.52    0.28
   6  13   8    0.66    0.65
  13  -6   8    0.13    0.56
   6  13   9   46.35    3.12
  13  -6   9   42.51    2.58
  13  -6  10    0.22    0.54
  13  -6  11   15.41    1.77
  13  -6  12   -0.79    0.86
  13  -5   0  130.47    3.96
  -5 -13   0  128.60    3.14
   5  13   0  136.67    3.31
  13  -5  -1   23.03    1.69
  -5 -13  -1   22.45    1.30
  13  -5   1   21.62    1.52
   5  13   1   22.30    1.34
   5  13  -1   23.24    1.19
  -5 -13  -2  151.55    3.89
  13  -5   2  145.29    4.15
 -13   5   2  146.03    3.93
   5  13   2  147.28    3.93
   5  13  -2  145.89    3.09
   5  13  -3    3.89    0.46
  -5 -13  -3    3.46    0.61
  13  -5   3    4.72    0.84
 -13   5   3    3.42    0.65
   5  13   3    3.22    0.66
   5  13  -4  110.00    2.41
  -5 -13  -4  107.75    3.60
  13  -5   4  103.30    3.50
 -13   5   4  106.55    3.65
   5  13   4   98.97    3.56
   5  13  -5    0.41    0.26
  13  -5   5    0.72    0.50
   5  13   5    0.30    0.45
  13  -5   6   97.15    3.54
   5  13  -6  102.11    2.40
   5  13   6   99.27    3.92
   5  13  -7    6.22    0.60
  13  -5   7    5.47    0.92
   5  13  -7    6.87    0.66
   5  13   7    5.34    0.97
   5  13  -8   48.27    1.76
   5  13   8   45.47    2.88
  13  -5   8   45.36    2.58
  13  -5   9    1.66    0.74
  13  -5  10   30.11    2.27
  13  -5  11   -0.85    0.69
  13  -5  12    1.35    0.75
  13  -5  13   -0.75    0.72
  -4 -13   0   -0.28    0.28
  13  -4   0   -0.07    0.45
   4  13   0   -0.07    0.25
  13  -4  -1    0.23    0.37
  -4 -13  -1    0.08    0.26
  13  -4   1   -0.45    0.47
  -4 -13   1   -0.01    0.21
 -13   4   1   -0.06    0.27
   4  13   1    0.81    0.40
   4  13  -1    0.28    0.26
  -4 -13  -2   17.85    1.21
  13  -4   2   14.92    1.28
 -13   4   2   16.37    1.22
   4  13   2   16.00    1.20
   4  13  -2   16.80    0.85
   4  13  -3    1.45    0.27
  -4 -13  -3    1.61    0.50
  13  -4   3    0.72    0.44
 -13   4   3    1.47    0.45
   4  13   3    1.40    0.54
   4  13  -4   25.47    0.90
  13  -4   4   25.26    1.68
  -4 -13  -4   25.95    1.67
   4  13   4   27.68    1.88
 -13   4   4   23.87    1.67
   4  13  -5    3.46    0.35
  -4 -13  -5    2.03    0.67
  13  -4   5    2.23    0.61
 -13   4   5    3.65    0.78
   4  13   5    2.70    0.71
  13  -4   6   13.35    1.34
   4  13  -6   15.36    0.74
   4  13  -6   14.29    0.75
   4  13   6   12.20    1.38
   4  13  -7   20.56    0.94
   4  13   7   20.76    1.82
   4  13  -7   21.32    1.02
  13  -4   7   19.67    1.63
   4  13  -8   42.45    1.54
  13  -4   8   45.95    2.60
 -13   4  -9    1.34    0.48
  13  -4   9    1.66    0.56
  13  -4  10   18.25    1.80
  13  -4  11    1.64    0.83
  13  -4  12    6.79    1.30
  13  -4  13   -0.59    0.80
  -3 -13   0   14.02    0.86
  13  -3   0   16.46    1.36
 -13   3   0   14.82    0.96
   3  13   0   14.89    0.94
  -3 -13  -1    7.40    0.69
  13  -3  -1    6.74    0.93
  13  -3   1    8.55    1.00
  -3 -13   1    8.19    0.59
 -13   3   1    7.27    0.75
   3  13  -1    7.98    0.61
   3  13   1    7.13    0.73
  -3 -13  -2   71.62    2.45
  13  -3   2   79.72    2.97
 -13   3   2   73.91    2.56
   3  13   2   80.25    2.74
   3  13  -2   73.29    1.69
  -3 -13  -3    5.36    0.75
  13  -3   3    6.22    0.91
 -13   3   3    5.26    0.73
   3  13   3    5.85    0.85
   3  13  -3    6.07    0.36
  13  -3   4    1.39    0.53
  -3 -13  -4    1.49    0.53
 -13   3  -4    1.03    0.50
 -13   3   4    0.88    0.44
   3  13   4    0.45    0.41
  -3 -13  -5    0.20    0.35
  13  -3   5    0.62    0.48
 -13   3   5    0.30    0.36
   3  13   5    1.15    0.59
   3  13  -6    0.12    0.14
  13  -3   6   -0.09    0.46
   3  13  -6    0.17    0.15
   3  13  -7    0.46    0.20
  13  -3   7    0.09    0.46
   3  13  -7    0.22    0.17
  13  -3   8   -0.06    0.54
   3  13  -8   -0.14    0.23
 -13   3  -8    0.71    0.35
 -13   3  -9   37.84    1.86
  13  -3   9   30.76    2.28
  13  -3  10   -0.11    0.56
  13  -3  11    4.64    1.13
  13  -3  12    0.47    0.78
  13  -3  13    1.10    0.66
  13  -2   0    0.51    0.43
  -2 -13   0    0.13    0.20
 -13   2   0   -0.03    0.26
   2  13   0    0.16    0.26
  -2 -13  -1  585.98    8.61
   2  13  -1  582.55    7.85
   2  13   1  573.33    8.77
 -13   2  -1  577.10    8.07
 -13   2   1  573.80    8.83
  -2 -13   1  588.71    7.72
  13  -2   1  587.58   10.08
  13  -2  -1  596.88   10.26
  13  -2   2   21.13    1.54
  -2 -13  -2   21.72    1.27
   2  13   2   22.15    1.34
 -13   2  -2   22.69    0.89
 -13   2   2   22.04    1.36
  13  -2   3  258.23    5.97
  -2 -13  -3  258.25    5.45
 -13   2   3  257.72    5.59
  13  -2   4    0.66    0.49
  -2 -13  -4    0.11    0.37
 -13   2  -4    0.24    0.35
 -13   2   4   -0.57    0.48
  13  -2   5  139.39    4.32
  -2 -13  -5  147.07    4.38
  13  -2   6   15.64    1.44
 -13   2  -6   16.04    0.85
   2  13  -7   91.68    1.58
   2  13  -7   92.95    1.57
 -13   2  -7   98.39    2.51
  13  -2   7   91.38    3.61
  13  -2   8    0.98    0.62
   2  13  -8    1.00    0.24
 -13   2  -8    1.33    0.39
 -13   2  -9   89.71    2.81
  13  -2   9   92.02    3.94
  13  -2  10    0.95    0.69
  13  -2  11   15.45    1.76
  13  -2  12    0.79    0.68
  13  -2  13   11.92    1.78
  -1 -13   0  216.51    3.76
 -13   1   0  209.03    3.93
  13  -1   0  218.98    5.31
  -1 -13  -1    0.39    0.26
 -13   1  -1    0.36    0.19
 -13   1   1    0.51    0.22
  13  -1   1    0.93    0.51
  -1 -13   1    0.09    0.15
  13  -1  -1    0.66    0.56
  13  -1   2  118.69    3.75
  -1 -13  -2  113.40    3.05
 -13   1  -2  107.05    1.92
  13  -1  -2  116.90    3.85
  13  -1   3    1.31    0.53
  -1 -13  -3    0.38    0.31
  13  -1   4  121.68    3.93
  -1 -13  -4  115.97    3.46
  13  -1   5    2.53    0.61
  -1 -13  -5    1.71    0.51
 -13   1  -5    1.16    0.15
  13  -1   6   60.78    2.90
 -13   1  -6   64.92    1.50
  13  -1   7    3.76    1.10
 -13   1  -7    3.26    0.40
   1  13  -8   20.60    0.70
 -13   1  -8   19.39    1.07
  13  -1   8   20.32    1.81
 -13   1  -9    2.04    0.40
  13  -1   9    4.25    1.01
  13  -1  10   17.83    1.85
  13  -1  11    2.94    0.92
  13  -1  12    2.75    0.96
  13   0   0    0.86    0.56
   0 -13   0    0.60    0.21
  13   0   1   12.08    1.18
   0 -13   1   10.64    0.48
  13   0  -1   11.15    1.15
   0 -13  -1   12.36    0.83
  13   0  -2    1.87    0.61
  13   0   2    1.54    0.60
   0 -13  -2    1.66    0.37
 -13   0  -3    6.22    0.91
  13   0   3    6.08    0.92
   0 -13  -3    5.37    0.73
  13   0   4   77.61    3.12
   0 -13  -4   74.70    2.84
  13   0   5   10.85    1.22
   0 -13  -5   10.71    1.14
  13   0   6    0.86    0.60
  13   0   7    2.54    0.70
  13   0   8   30.55    2.23
  13   0   9   -0.34    0.63
  13   0  10   29.88    2.39
  13   0  11    3.12    1.06
  13   0  12    4.85    1.13
  13   1   0  113.54    3.67
   1 -13   0  108.77    2.32
  13   1   1    0.66    0.45
   1 -13   1    0.56    0.13
  13   1  -1    0.90    0.46
   1 -13  -1    0.44    0.24
  13   1  -2    1.64    0.60
  13   1   2    2.30    0.60
   1 -13  -2    1.11    0.35
  13   1   3   26.07    1.78
   1 -13  -3   24.51    1.47
  13   1   4    7.83    1.05
   1 -13  -4    6.80    0.90
  13   1   5   20.99    1.68
   1 -13  -5   23.57    1.68
  13   1   6   39.82    2.37
  13   1   7    0.29    0.49
  13   1   8   32.07    2.31
  13   1   9    3.15    0.96
  13   1  10    3.88    1.03
  13   1  11    3.58    1.01
  13   1  12   -0.03    0.62
  13   2   0    0.61    0.45
   2 -13   0   -0.12    0.22
  13   2  -1  443.21    8.46
  13   2   1  436.62    8.39
   2 -13   1  438.59    5.57
   2 -13  -1  437.35    6.86
  13   2  -2   28.77    1.86
  13   2   2   29.34    1.87
   2 -13  -2   29.47    1.49
  13   2  -3  223.02    5.68
  13   2   3  232.59    5.70
   2 -13  -3  217.63    4.97
  13   2   4    8.91    1.08
  13   2  -4    9.20    1.00
   2 -13  -4    8.73    0.99
  13   2   5  245.84    6.19
  13   2  -5  235.62    5.65
   2 -13  -5  243.61    5.94
  13   2   6    0.46    0.51
  13   2  -6    0.77    0.56
  13   2  -7  255.47    6.59
  13   2   7  247.11    6.60
  13   2  -8    4.06    0.85
  13   2   8    4.42    1.04
  13   2  -9   51.37    3.09
  13   2   9   51.38    3.09
  13   2 -10    0.35    0.62
  13   2  10    0.82    0.77
  13   2  11   18.41    2.04
  13   2  12    0.86    0.67
  13   3   0   95.57    3.39
   3 -13   0   95.45    2.25
  13   3  -1   -0.77    0.57
  13   3   1   -0.33    0.41
   3 -13   1    0.01    0.14
   3 -13  -1   -0.11    0.22
  13   3   2   76.94    3.08
  13   3  -2   77.30    3.04
  13   3  -2   76.26    2.35
   3 -13  -2   71.71    2.44
  13   3   3    1.34    0.56
  13   3  -3    2.22    0.61
  13   3  -3    2.58    0.53
   3 -13  -3    2.66    0.55
  13   3   4    5.23    0.87
  13   3  -4    4.27    0.70
   3 -13  -4    4.06    0.69
  13   3   5    3.55    0.69
  13   3  -5    2.13    0.47
   3 -13  -5    3.27    0.68
  13   3  -6   26.99    1.90
  13   3   6   29.25    2.11
  13   3   7   17.74    1.72
  13   3  -7   16.89    1.62
  13   3  -8  108.98    4.36
  13   3   8  109.21    4.40
  13   3  -9    0.46    0.57
  13   3   9    1.43    0.83
  13   3 -10   -0.38    0.61
  13   3  10    2.14    0.94
  13   3 -11    2.41    1.04
  13   3  11    1.66    0.86
  13   4   0   -0.37    0.40
   4 -13   0    0.07    0.21
  13   4   1   27.06    1.80
  13   4  -1   26.42    1.75
  13   4  -1   26.82    1.20
   4 -13  -1   25.14    1.32
   4 -13   1   27.24    0.95
  13   4  -2    7.54    1.03
  13   4   2    6.87    0.93
  13   4  -2    7.80    0.75
   4 -13  -2    8.34    0.86
  13   4   3    4.34    0.81
  13   4  -3    3.71    0.76
  13   4  -3    5.30    0.72
   4 -13  -3    4.22    0.71
  13   4   4    1.05    0.67
  13   4  -4   -0.39    0.50
  13   4  -4   -0.04    0.35
   4 -13  -4    0.36    0.35
  13   4   5   48.43    2.63
  13   4  -5   48.30    2.41
   4 -13  -5   50.04    2.57
  13   4  -6   36.46    2.25
  13   4   6   38.05    2.39
  13   4   7    3.94    0.84
  13   4  -7    6.84    1.09
  13   4  -8   10.41    1.37
  13   4   8   11.32    1.47
  13   4  -9    0.84    0.66
  13   4   9    1.12    0.75
  13   4 -10   34.91    2.69
  13   4  10   32.00    2.59
  13   4 -11    0.23    0.83
  13   4  11   -0.85    0.83
  13   5   0   44.82    1.38
   5 -13   0   43.11    1.61
  13   5   0   43.31    2.27
  13   5  -1   13.66    0.91
   5 -13  -1   10.95    0.91
   5 -13   1   12.94    0.74
  13   5  -1   11.97    1.23
  13   5   1   11.87    1.23
  13   5   2   82.29    3.26
   5 -13   2   85.62    1.55
  13   5  -2   80.48    3.15
  13   5  -2   80.42    2.55
   5 -13   2   84.98    1.61
   5 -13  -2   81.10    2.76
  13   5   3    6.62    1.00
  13   5  -3    6.39    0.92
  13   5  -3    8.01    0.86
   5 -13  -3    7.57    0.90
  13   5   4  154.22    4.76
  13   5  -4  152.17    4.64
  13   5  -4  153.77    4.28
   5 -13  -4  163.08    4.75
  13   5   5    0.72    0.50
  13   5  -5    0.55    0.42
   5 -13  -5   -0.08    0.52
  13   5   6    6.65    1.09
  13   5  -6    7.28    1.06
  13   5   7    1.07    0.62
  13   5  -7   -0.13    0.49
  13   5  -8   15.86    1.69
  13   5   8   14.44    1.65
  13   5  -9   10.91    1.57
  13   5   9   12.10    1.64
  13   5 -10   18.67    2.04
  13   5  10   18.12    2.02
  13   5 -11    0.18    0.70
  13   5  11    0.96    0.68
  13   6   0   -0.03    0.20
  13   6   0    0.00    0.46
  13   6   1  406.71    8.26
  13   6   1  423.96    5.59
  13   6  -1  417.90    6.81
   6 -13   1  415.33    6.19
  13   6  -1  407.34    8.18
  13   6   2    2.24    0.64
  13   6  -2    2.73    0.71
   6 -13   2    1.35    0.25
  13   6  -2    1.88    0.49
  13   6   3  561.07   10.52
  13   6  -3  580.49   10.40
   6 -13  -3  574.54    9.96
  13   6  -3  571.27    9.59
   6 -13   3  576.72    7.09
  13   6   4    0.41    0.51
  13   6  -4   -0.40    0.56
  13   6  -4    0.93    0.52
   6 -13  -4   -0.26    0.52
  13   6   5   73.82    3.36
  13   6  -5   82.47    3.29
  13   6  -5   77.16    3.27
  13   6   6    4.37    0.91
  13   6  -6    4.53    0.94
  13   6  -7  114.08    4.34
  13   6   7  110.89    4.46
  13   6  -8    1.66    0.75
  13   6   8    1.82    0.76
  13   6  -9   51.78    3.23
  13   6   9   55.56    3.34
  13   6 -10   -0.01    0.72
  13   6  10    0.87    0.74
  13   6 -11    6.40    1.34
  13   6  11    6.88    1.47
  13   7   0   54.62    2.60
  13   7   1    2.37    0.71
   7 -13   1    1.90    0.37
  13   7  -1    4.01    0.81
  13   7   2   12.09    1.33
  13   7   2   11.95    0.43
  13   7  -2   12.49    1.28
   7 -13   2   11.69    0.69
  13   7   3    0.18    0.48
   7 -13   3    0.75    0.22
  13   7  -3    1.64    0.59
  13   7  -3    1.24    0.51
  13   7   4   24.22    1.85
  13   7  -4   26.91    1.84
  13   7  -4   23.24    1.63
   7 -13   4   25.18    0.84
  13   7   5    2.89    0.83
  13   7  -5    1.27    0.50
  13   7  -5    2.48    0.67
   7 -13   5    2.38    0.27
  13   7  -6   27.57    2.04
  13   7   6   24.57    2.04
  13   7  -7   -0.34    0.55
  13   7   7    0.77    0.63
  13   7  -8    3.69    0.99
  13   7   8    1.90    0.87
  13   7  -9    9.96    1.51
  13   7   9    9.14    1.43
  13   7 -10   -0.36    0.68
  13   7  10    0.28    0.64
  13   7 -11    6.82    1.38
  13   8   0   -0.91    0.53
  13   8   1    9.15    1.16
   8 -13   1    8.77    0.74
  13   8  -1    9.65    1.13
  13   8   2   33.91    2.16
   8 -13   2   31.95    1.29
  13   8  -2   31.73    1.98
   8 -13   3    1.58    0.31
  13   8   3    1.50    0.58
  13   8  -3    0.85    0.45
  13   8   3    1.64    0.17
  13   8  -4    9.49    1.12
  13   8   4    9.35    1.23
   8 -13   4    8.06    0.59
  13   8   5    2.22    0.81
  13   8  -5    1.96    0.64
  13   8  -5    2.21    0.61
   8 -13   5    1.84    0.32
  13   8   6    3.22    0.89
  13   8  -6    2.54    0.76
  13   8  -6    2.37    0.70
   8 -13   6    4.19    0.44
  13   8  -7   12.18    1.49
  13   8   7   12.77    1.55
  13   8  -8   10.64    1.51
  13   8   8    8.03    1.34
  13   8  -9    0.74    0.85
  13   8   9   -0.13    0.67
  13   8 -10   22.01    2.26
  13   8  10   23.84    2.36
  13   8 -11    1.98    0.97
  13   9   0  176.68    5.00
   9 -13   1    2.77    0.47
  13   9  -1    2.09    0.64
  13   9   1    2.36    0.70
  13   9  -2  138.47    4.31
   9 -13   2  142.26    3.24
  13   9   2  139.63    4.53
  13   9  -3    0.73    0.51
  13   9   3    1.13    0.54
   9 -13   3    2.42    0.40
   9 -13   4   95.59    2.42
  13   9  -4   92.38    3.50
  13   9   4   98.62    1.84
  13   9   4   95.83    3.88
  13   9  -5    8.40    1.11
  13   9   5    8.33    1.20
   9 -13   5    8.81    0.69
  13   9  -6   11.79    1.33
  13   9   6   14.01    1.65
   9 -13   6   12.34    0.83
  13   9  -7    1.66    0.52
  13   9  -7    4.23    0.94
  13   9   7    2.01    0.92
  13   9  -8   39.00    2.76
  13   9   8   39.87    2.87
  13   9  -9    1.01    0.85
  13   9   9   -0.80    0.65
  13   9 -10    8.86    1.55
  13   9  10    7.50    1.50
  13  10   0   -0.30    0.54
  10 -13   1  287.69    5.59
  13  10   1  291.13    6.84
  13  10  -1  287.93    6.68
  10 -13   2   18.24    1.14
  13  10  -2   18.42    1.57
  13  10   2   19.32    1.66
  13  10  -3  169.89    4.92
  10 -13   3  175.07    3.80
  13  10   3  171.69    5.28
  10 -13   4   23.26    1.21
  13  10  -4   20.29    1.63
  13  10   4   21.06    0.92
  13  10   4   24.39    1.98
  13  10  -5  100.42    3.71
  13  10   5  108.46    4.31
  10 -13   5  101.88    2.62
  13  10  -6    0.39    0.57
  13  10   6    0.51    0.61
  10 -13   6    0.56    0.33
  13  10  -7   59.78    2.96
  13  10   7   62.83    3.50
  13  10  -8   -0.08    0.53
  13  10  -8    0.04    0.66
  13  10   8   -0.11    0.68
  13  10  -9   24.87    2.13
  13  10  -9   30.47    2.65
  13  10   9   25.95    2.44
  13  10 -10    0.69    0.81
  11 -13   0   74.43    2.77
  13  11   0   75.57    3.22
  11 -13   1    0.30    0.41
  13  11   1    0.74    0.59
  13  11  -1   -0.11    0.45
  13  11  -2   13.96    1.38
  11 -13   2   13.45    1.06
  13  11   2   12.71    1.40
  11 -13   3    0.22    0.33
  13  11  -3    0.46    0.41
  13  11   3    0.51    0.47
  13  11  -4    0.29    0.43
  13  11   4    0.65    0.64
  11 -13   4    0.01    0.28
  13  11  -5    6.38    0.96
  13  11   5    8.31    1.34
  11 -13   5    8.55    0.82
  13  11  -6   20.69    1.70
  13  11   6   20.41    2.00
  11 -13   6   20.97    1.26
  13  11  -7    2.27    0.70
  13  11   7    1.09    0.59
  13  11  -8    1.72    0.72
  13  11   8    0.43    0.68
  13  11  -9    2.96    0.79
  13  11  -9    4.95    1.27
  13  11   9    3.31    1.10
  13  11 -10    5.56    1.31
  13  11 -10    1.62    0.79
  12 -13   0    0.94    0.52
  13  12   0    0.09    0.49
  12 -13   1    9.66    0.99
  13  12  -1    6.42    0.97
  13  12   1    8.88    1.18
  12 -13   2    0.33    0.32
  13  12  -2    0.36    0.49
  13  12   2    0.67    0.55
  13  12  -3   73.08    3.13
  12 -13   3   70.99    2.55
  13  12   3   68.65    3.30
  12 -13   4   22.64    1.37
  13  12  -4   19.58    1.64
  13  12   4   20.37    1.92
  13  12  -5   15.91    1.52
  13  12   5   14.40    1.66
  12 -13   5   14.79    1.12
  13  12  -6    7.00    1.05
  13  12   6    6.87    1.25
  13  12  -7   -0.41    0.60
  13  12   7    0.12    0.70
  13  12  -8    8.93    1.16
  13  12   8    8.36    1.49
  13  12  -9    0.35    0.45
  13  12  -9    0.67    0.65
  13  12   9    1.03    0.73
  13 -13   0   60.74    2.69
  13  13   0   60.96    2.92
  13 -13   1    6.40    0.89
  13  13   1    7.07    1.06
  13  13  -1    6.05    0.99
  13 -13   2   95.81    3.19
  13  13  -2   91.03    3.55
  13  13   2   92.62    3.82
  13  13  -3   14.76    1.47
  13 -13   3   13.55    1.17
  13  13   3   11.76    1.34
  13  13  -4   92.13    3.57
  13 -13   4   97.18    3.13
  13  13   4   90.26    4.02
  13  13  -5    1.17    0.51
  13 -13   5    1.58    0.48
  13  13   5    0.79    0.56
  13  13  -6   46.28    2.50
  13  13   6   43.88    2.95
  13  13  -7    0.60    0.43
  13  13   7    0.34    0.59
  13  13  -8   18.70    1.63
  13  13   8   22.34    2.32
  14 -13   0   -0.31    0.41
  13  14   0    0.83    0.54
  14 -13  -1   60.47    2.92
  14 -13   1   63.30    2.77
  13  14   1   61.89    3.08
  13  14  -1   63.95    2.98
  14 -13   2    1.43    0.58
  13  14  -2    0.34    0.47
  13  14   2   -0.36    0.61
  14 -13   3   90.81    3.22
  13  14  -3   91.86    3.55
  13  14   3   93.12    3.98
  13  14  -4    6.72    0.99
  14 -13   4    5.09    0.78
  13  14   4    5.33    1.12
  13  14  -5   57.63    2.78
  14 -13   5   55.78    2.44
  13  14   5   57.23    3.32
  13  14  -6    0.03    0.45
  13  14   6    1.64    0.89
  13  14  -7   36.13    2.21
  13  14   7   32.81    2.67
  13  14   8    3.06    1.16
  14 -12   0    2.84    0.69
  12  14   0    3.71    0.78
  14 -12  -1    0.87    0.54
  14 -12   1    2.32    0.66
  12  14  -1    1.90    0.59
  12  14   1    2.01    0.67
  14 -12   2    4.41    0.76
  12  14  -2    4.93    0.83
  12  14   2    5.79    0.99
  14 -12   3    1.57    0.46
  12  14   3    1.83    0.67
  12  14  -3    1.06    0.50
  12  14  -4   12.27    1.21
  14 -12   4   11.84    1.16
  12  14   4   12.23    1.47
  12  14  -5    3.53    0.74
  14 -12   5    4.38    0.76
  12  14   5    5.67    1.19
  12  14  -6   -0.35    0.47
  14 -12   6    0.66    0.51
  12  14   6   -0.60    0.71
  12  14  -7    0.45    0.50
  12  14   7    0.36    0.63
  12  14   8    0.50    0.84
  14 -11   0    0.72    0.48
  11  14   0   -0.19    0.47
  14 -11  -1    1.16    0.61
  14 -11   1   -0.31    0.49
  11  14  -1    0.84    0.48
  11  14   1    0.10    0.48
  14 -11   2    0.73    0.53
  11  14  -2    0.66    0.53
  11  14   2    1.47    0.69
  14 -11   3    2.69    0.66
  11  14   3    2.69    0.74
  11  14  -3    1.92    0.51
  11  14  -4   17.76    1.38
  14 -11   4   17.49    1.43
  11  14   4   14.48    1.57
  11  14  -5    6.75    0.95
  14 -11   5    4.96    0.77
  11  14   5    5.32    1.08
  11  14  -6   18.23    1.46
  14 -11   6   19.16    1.51
  11  14   6   19.13    1.94
  11  14  -7    7.56    1.00
  14 -11   7    6.48    0.92
  11  14   7    6.96    1.31
  11  14   8    3.95    1.02
  11  14   9    1.77    0.84
  14 -10   0    0.19    0.41
  10  14   0    0.98    0.60
  14 -10   1    5.94    0.90
  14 -10  -1    6.84    1.02
 -10 -14  -1    7.08    0.98
  10  14  -1    6.81    0.90
  10  14   1    6.85    0.94
  14 -10   2  137.79    4.14
  10  14  -2  139.37    3.96
  10  14   2  134.94    4.37
  14 -10   3    5.20    0.83
  10  14  -3    4.28    0.67
  10  14   3    4.30    0.83
  14 -10   4  130.46    4.00
  10  14  -4  131.21    3.77
  10  14   4  134.64    4.69
  10  14  -5   10.47    1.03
  14 -10   5   10.32    1.12
  10  14   5   10.94    1.42
  10  14  -6   34.53    1.86
  14 -10   6   31.38    1.96
  10  14   6   34.23    2.48
  10  14  -7   -0.51    0.45
  14 -10   7   -0.46    0.49
  10  14   7   -0.46    0.66
  10  14   8   27.90    2.46
  14 -10   8   27.25    1.90
  10  14   9    1.64    0.96
  14  -9   0   -0.23    0.40
  -9 -14   0   -0.16    0.38
   9  14   0    0.99    0.52
  14  -9  -1   26.10    1.89
  -9 -14  -1   28.43    1.76
  14  -9   1   26.69    1.75
   9  14  -1   27.81    1.66
   9  14   1   29.21    1.81
  14  -9   2   31.96    1.93
  -9 -14  -2   32.91    1.97
   9  14  -2   34.32    1.79
   9  14   2   34.66    2.07
   9  14  -3  194.90    4.57
  14  -9   3  187.59    4.98
   9  14   3  194.10    5.38
   9  14  -4    0.14    0.38
  14  -9   4    0.55    0.51
   9  14   4    0.72    0.61
   9  14  -5  105.21    3.14
  14  -9   5  100.21    3.55
   9  14   5   97.88    4.03
   9  14  -6   -0.21    0.34
  14  -9   6    0.72    0.57
   9  14   6    0.10    0.52
   9  14  -7   23.09    1.46
  14  -9   7   20.24    1.61
   9  14   7   22.07    2.12
   9  14   8    0.08    0.64
  14  -9   8    0.42    0.43
   9  14   9   44.24    3.24
  14  -9   9   42.49    2.56
  14  -8   0   38.34    2.17
  -8 -14   0   41.00    1.96
   8  14   0   40.29    1.93
  -8 -14  -1   39.69    1.99
  14  -8  -1   40.33    2.28
  14  -8   1   38.14    2.11
   8  14   1   40.31    2.06
   8  14  -1   40.31    1.89
  14  -8   2    7.33    0.96
  -8 -14  -2    9.62    1.06
   8  14  -2    9.19    0.88
   8  14   2   10.13    1.12
  14  -8   3   16.53    1.41
   8  14  -3   16.32    1.15
   8  14   3   16.17    1.45
  14  -8   4    3.82    0.78
   8  14  -4    4.20    0.58
   8  14   4    5.01    0.97
   8  14  -5   15.10    1.07
  14  -8   5   14.51    1.35
   8  14   5   15.86    1.64
   8  14  -6    1.23    0.32
  14  -8   6    1.61    0.65
   8  14   6    2.75    0.83
   8  14  -7   42.93    1.87
   8  14   7   43.55    2.86
  14  -8   7   37.50    2.22
  14  -8   8   -0.03    0.48
   8  14   8    0.04    0.69
   8  14   9    1.93    0.89
  14  -8   9    0.98    0.64
   8  14  10    0.62    0.67
  14  -8  10    1.74    0.74
  14  -7   0   -0.15    0.38
  -7 -14   0    0.07    0.34
   7  14   0   -0.04    0.31
  14  -7  -1   13.28    1.35
  -7 -14  -1   12.35    1.08
  14  -7   1   11.22    1.17
   7  14  -1   13.65    1.04
   7  14   1   11.87    1.09
  -7 -14  -2   40.89    2.05
  14  -7   2   40.40    2.17
   7  14  -2   41.40    1.76
   7  14   2   38.32    2.04
   7  14  -3    4.64    0.59
  14  -7   3    4.88    0.84
  -7 -14  -3    5.33    0.88
 -14   7   3    4.39    0.80
   7  14   3    4.32    0.80
   7  14  -4    2.07    0.45
  14  -7   4    1.74    0.53
   7  14   4    1.96    0.63
   7  14  -5    3.13    0.54
  14  -7   5    2.30    0.67
   7  14   5    2.21    0.66
   7  14  -6   45.40    1.75
  14  -7   6   42.67    2.35
   7  14   6   40.61    2.58
   7  14  -7    0.76    0.40
  14  -7   7    0.45    0.50
   7  14   7    0.40    0.67
  14  -7   8    4.38    0.86
   7  14   8    3.43    0.97
   7  14   9    3.68    1.11
  14  -7   9    3.58    0.93
  14  -7  10    6.06    1.15
  14  -7  11    2.19    0.81
  14  -6   0   28.45    1.85
  -6 -14   0   27.45    1.43
   6  14   0   26.91    1.48
  14  -6  -1   61.87    2.83
  -6 -14  -1   70.03    2.49
  14  -6   1   68.20    2.86
   6  14   1   69.76    2.57
   6  14  -1   69.46    2.28
  -6 -14  -2  227.65    5.17
  14  -6   2  216.42    5.44
 -14   6   2  216.00    5.20
   6  14  -2  218.66    4.26
   6  14   2  227.52    5.27
   6  14  -3    0.71    0.34
  -6 -14  -3    0.27    0.42
  14  -6   3   -0.30    0.51
 -14   6   3    0.11    0.33
   6  14   3    1.25    0.57
  14  -6   4  148.63    4.43
   6  14  -4  154.73    3.23
   6  14   4  146.51    4.58
  14  -6   5    5.49    0.89
   6  14  -5    5.75    0.56
   6  14   5    4.36    0.85
   6  14  -6   81.18    2.23
  14  -6   6   77.90    3.22
   6  14   6   89.81    3.97
   6  14  -7    9.45    0.73
  14  -6   7    9.51    1.18
   6  14   7    8.79    1.34
   6  14   8   80.72    3.96
  14  -6   8   71.73    3.31
  14  -6   9    0.47    0.70
  14  -6  10    7.89    1.17
  14  -6  11   -0.78    0.74
  14  -6  12   13.78    1.75
  -5 -14   0    0.10    0.25
  14  -5   0    1.14    0.62
   5  14   0   -0.29    0.35
  14  -5  -1   82.89    3.26
  -5 -14  -1   78.48    2.57
  14  -5   1   81.62    3.15
 -14   5   1   79.12    2.72
   5  14  -1   86.60    2.42
   5  14   1   81.92    2.70
  -5 -14  -2   14.99    1.18
  14  -5   2   14.67    1.32
 -14   5   2   15.62    1.25
   5  14   2   15.46    1.25
   5  14  -2   16.01    0.91
  14  -5   3   78.28    3.11
  -5 -14  -3   74.86    2.85
 -14   5   3   78.96    3.02
   5  14  -3   79.23    1.97
   5  14   3   74.28    2.95
   5  14  -4    0.02    0.22
  14  -5   4    0.83    0.57
  -5 -14  -4    0.39    0.45
 -14   5   4    0.34    0.41
   5  14   4   -0.12    0.53
   5  14  -5  122.14    2.47
  14  -5   5  124.39    4.09
   5  14   5  125.07    4.39
   5  14  -6    0.53    0.22
  14  -5   6    0.03    0.47
   5  14   6   -0.55    0.58
   5  14  -7   34.15    1.25
   5  14   7   27.36    2.17
  14  -5   7   29.97    2.06
  14  -5   8    2.27    0.71
  14  -5   9   30.01    2.22
  14  -5  10    1.78    0.74
  14  -5  11    8.83    1.34
  14  -5  12   -0.48    0.81
  14  -4   0   23.00    1.67
  -4 -14   0   24.69    1.23
 -14   4   0   24.12    1.31
   4  14   0   24.46    1.26
  -4 -14  -1  147.56    3.58
  -4 -14   1  147.69    3.09
  14  -4   1  142.84    4.29
  14  -4  -1  142.79    4.43
 -14   4   1  141.76    3.66
   4  14   1  145.41    3.66
   4  14  -1  147.28    3.16
  -4 -14  -2   41.85    1.91
  14  -4   2   39.91    2.17
 -14   4   2   43.24    2.02
   4  14   2   42.43    2.00
   4  14  -2   43.58    1.40
  -4 -14  -3   33.75    1.83
  14  -4   3   33.63    2.01
 -14   4   3   34.64    1.93
   4  14   3   37.03    2.08
   4  14  -3   33.85    1.08
  -4 -14  -4    0.91    0.44
   4  14  -4    0.53    0.18
  14  -4   4    1.11    0.50
 -14   4   4    1.62    0.60
   4  14   4    0.34    0.48
   4  14  -5    3.59    0.29
  14  -4   5    3.00    0.73
   4  14   5    2.88    0.71
  14  -4   6   -0.58    0.58
   4  14  -6    0.08    0.14
   4  14   6   -0.95    0.52
   4  14  -6   -0.07    0.15
   4  14  -7   35.40    1.08
  14  -4   7   32.05    2.19
  14  -4   8   19.37    1.78
  14  -4   9   10.57    1.40
  14  -4  10    2.67    0.91
  14  -4  11    7.84    1.34
  14  -4  12    1.88    0.90
  -3 -14   0    0.01    0.24
  14  -3   0   -0.62    0.47
 -14   3   0    0.30    0.27
   3  14   0    0.54    0.33
  -3 -14  -1   33.25    1.53
   3  14   1   34.37    1.64
 -14   3  -1   32.66    1.42
 -14   3   1   33.04    1.61
   3  14  -1   36.25    1.39
  14  -3   1   33.91    2.01
  14  -3  -1   33.19    2.05
  -3 -14   1   33.30    1.21
  -3 -14  -2   49.53    2.04
  14  -3   2   50.25    2.46
   3  14  -2   61.30    1.57
 -14   3   2   48.69    2.12
   3  14   2   50.64    2.15
  -3 -14  -3    0.95    0.37
  14  -3   3    0.73    0.45
 -14   3   3    1.90    0.57
   3  14   3    0.50    0.36
  -3 -14  -4    0.74    0.34
  14  -3   4    0.31    0.49
 -14   3   4    0.45    0.42
   3  14   4    0.31    0.41
  14  -3   5    5.47    0.89
  14  -3   6    8.11    1.14
  14  -3   7    9.46    1.22
 -14   3  -7    9.38    0.78
  14  -3   8   15.93    1.60
 -14   3  -8   19.18    1.20
  14  -3   9    2.49    0.94
  14  -3  10    4.75    1.12
  14  -3  11    0.86    0.74
  14  -3  12    2.38    0.92
 -14   2   0  179.94    3.74
  14  -2   0  178.29    4.92
  -2 -14   0  186.71    3.54
  -2 -14  -1   84.07    2.42
 -14   2  -1   80.29    2.08
 -14   2   1   82.14    2.54
  14  -2  -1   86.16    3.33
  -2 -14   1   85.20    1.88
  14  -2   1   84.58    3.24
  14  -2   2  297.94    6.65
  -2 -14  -2  286.30    5.58
 -14   2  -2  288.71    4.40
 -14   2   2  280.93    5.73
  14  -2  -2  282.95    6.69
  -2 -14  -3   -0.13    0.36
 -14   2  -3    0.65    0.19
 -14   2   3    0.38    0.32
  14  -2   3    0.33    0.51
  -2 -14  -4  132.88    3.96
  14  -2   4  131.69    4.23
  14  -2   5    4.00    0.81
  -2 -14  -5    2.79    0.58
  14  -2   6   71.89    3.20
 -14   2  -6   72.54    1.72
  14  -2   7    0.16    0.51
 -14   2  -7   -0.29    0.24
 -14   2  -8  114.16    2.79
  14  -2   8  107.42    4.25
  14  -2   9   -0.52    0.72
  14  -2  10   32.11    2.52
  14  -2  11    2.10    0.86
  14  -2  12   17.82    2.03
  14  -1   0   -0.43    0.44
  -1 -14   0   -0.12    0.19
  14  -1   1   33.06    2.01
  -1 -14   1   33.76    0.99
  14  -1  -1   32.54    2.00
  -1 -14  -1   33.41    1.44
  14  -1   2    0.38    0.46
  14  -1  -2   -0.06    0.44
  -1 -14  -2   -0.20    0.40
  14  -1   3  117.85    3.95
  -1 -14  -3  118.78    3.46
  -1 -14  -4    0.82    0.40
  14  -1   4    0.61    0.55
  14  -1   5   27.11    1.91
  -1 -14  -5   25.13    1.69
  14  -1   6    0.58    0.53
  14  -1   7   21.90    1.83
  14  -1   8   -0.27    0.59
  14  -1   9   11.15    1.48
  14  -1  10    0.95    0.68
  14  -1  11    9.91    1.52
  14  -1  12   -0.04    0.80
  14   0   0    7.46    0.99
   0 -14   0    6.80    0.55
  14   0   1    0.21    0.46
  14   0  -1    0.52    0.49
   0 -14   1    0.12    0.12
   0 -14  -1    0.20    0.23
  14   0  -2    9.61    1.15
  14   0   2    9.70    1.15
   0 -14  -2    7.77    0.78
  14   0   3   38.14    2.20
   0 -14  -3   31.82    1.67
  14   0   4   23.70    1.78
   0 -14  -4   25.69    1.65
   0 -14  -5    2.58    0.62
  14   0   5    3.08    0.76
  14   0   6   16.36    1.60
  14   0   7   34.85    2.31
  14   0   8    2.20    0.77
  14   0   9   20.39    1.97
  14   0  10    4.05    1.09
  14   0  11    1.49    0.81
  14   0  12    6.61    1.31
  14   1   0    0.11    0.44
   1 -14   0    0.13    0.20
  14   1  -1   30.39    1.95
   1 -14   1   26.33    0.71
  14   1   1   24.15    1.75
   1 -14  -1   26.18    1.26
  14   1  -2    1.86    0.64
  14   1   2    0.79    0.43
   1 -14  -2    1.87    0.46
  14   1  -3    1.20    0.64
  14   1   3    2.70    0.76
   1 -14  -3    2.56    0.53
  14   1   4   10.82    1.25
   1 -14  -4    9.31    1.03
  14   1   5   21.49    1.75
   1 -14  -5   22.09    1.67
  14   1   6   -0.22    0.58
  14   1   7    2.74    0.82
  14   1   8   12.61    1.48
  14   1   9   -0.04    0.63
  14   1  10    1.39    0.71
  14   1  11    2.72    0.98
  14   2   0  121.26    4.03
   2 -14   0  127.04    2.63
  14   2  -1    3.94    0.80
  14   2   1    5.68    0.91
   2 -14  -1    5.68    0.60
   2 -14   1    5.31    0.31
  14   2  -2  216.21    5.62
  14   2   2  213.19    5.61
   2 -14  -2  212.68    4.58
  14   2  -3    2.03    0.63
  14   2   3    3.09    0.78
   2 -14  -3    2.63    0.54
  14   2   4  194.43    5.46
   2 -14  -4  199.82    5.06
  14   2   5    1.48    0.70
   2 -14  -5    1.03    0.51
  14   2   6  192.85    5.69
  14   2  -6  190.65    5.35
  14   2   7   10.90    1.32
  14   2  -7   11.31    1.38
  14   2  -8   37.31    2.53
  14   2   8   37.72    2.60
  14   2   9    2.17    0.84
  14   2  10   20.22    2.08
  14   2  11    0.71    0.74
  14   3   0    0.23    0.48
   3 -14   0   -0.04    0.19
  14   3  -1   43.03    2.32
   3 -14   1   47.17    1.11
  14   3   1   47.10    2.44
   3 -14  -1   45.25    1.72
  14   3   2    1.56    0.67
  14   3  -2   -0.36    0.60
   3 -14  -2    0.58    0.37
  14   3   3   31.50    2.04
  14   3  -3   26.33    1.87
  14   3  -3   33.76    1.71
   3 -14  -3   29.07    1.69
  14   3   4    4.44    0.86
  14   3  -4    8.69    1.17
  14   3  -4    4.03    0.71
   3 -14  -4    4.51    0.77
  14   3   5    1.66    0.55
  14   3  -5    1.43    0.54
   3 -14  -5    2.01    0.56
  14   3   6   14.21    1.57
  14   3  -6   12.77    1.33
  14   3  -7   35.24    2.33
  14   3   7   35.38    2.43
  14   3   8    2.35    0.86
  14   3  -8    2.18    0.77
  14   3  -9    2.73    0.92
  14   3   9    2.56    0.90
  14   3 -10    0.57    0.68
  14   3  10   -0.48    0.72
  14   3 -11    0.06    0.67
  14   3  11    0.03    0.80
  14   4   0   43.73    2.38
   4 -14   0   47.31    1.58
  14   4   1   14.04    1.35
  14   4  -1   16.61    1.47
   4 -14   1   14.32    0.66
   4 -14  -1   14.83    1.02
  14   4   2    3.96    0.91
  14   4  -2    4.03    0.83
  14   4  -2    3.25    0.53
   4 -14  -2    3.03    0.57
  14   4   3    2.16    0.72
  14   4  -3    1.96    0.61
  14   4  -3    2.05    0.49
   4 -14  -3    1.28    0.47
  14   4   4   56.64    2.86
  14   4  -4   61.06    2.92
  14   4  -4   60.56    2.56
   4 -14  -4   61.79    2.71
  14   4   5    4.23    0.85
  14   4  -5    3.90    0.77
   4 -14  -5    3.42    0.78
  14   4   6    2.19    0.80
  14   4  -6    3.23    0.78
  14   4   7   12.82    1.49
  14   4  -7   13.47    1.49
  14   4  -8    4.75    1.03
  14   4   8    4.02    0.91
  14   4  -9   14.38    1.73
  14   4   9   13.41    1.71
  14   4 -10    5.36    1.17
  14   4  10    4.55    1.10
  14   4 -11   10.91    1.69
  14   4  11   13.36    1.82
  14   5   0    0.19    0.48
   5 -14   0   -0.04    0.24
  14   5   1   40.93    2.32
  14   5  -1   41.41    2.31
  14   5  -1   42.58    1.58
   5 -14  -1   41.83    1.80
   5 -14   1   41.47    1.31
  14   5   2    4.79    0.90
  14   5  -2    5.84    0.93
  14   5  -2    5.19    0.65
   5 -14  -2    7.14    0.87
  14   5   3   11.53    1.28
  14   5  -3    9.27    1.14
  14   5  -3    8.73    0.88
   5 -14  -3   11.99    1.17
  14   5   4    2.91    0.76
  14   5  -4    4.82    0.92
  14   5  -4    3.00    0.64
   5 -14  -4    4.02    0.74
  14   5   5   34.58    2.33
  14   5  -5   33.29    2.03
  14   5  -5   31.46    2.18
  14   5   6    7.29    1.16
  14   5  -6    5.43    0.94
  14   5   7    1.44    0.66
  14   5  -7    0.45    0.47
  14   5  -8    4.50    1.02
  14   5   8    3.68    0.93
  14   5  -9    3.85    0.94
  14   5   9    4.99    1.16
  14   5 -10    1.54    0.84
  14   5  10    2.05    0.81
  14   5 -11   11.80    1.75
  14   6   0  200.07    5.46
   6 -14   0  196.97    4.15
  14   6   0  210.26    3.68
  14   6  -1    4.11    0.78
   6 -14   1    3.76    0.41
  14   6   1    3.81    0.87
  14   6  -1    3.93    0.51
   6 -14   1    3.59    0.44
   6 -14  -1    4.46    0.65
  14   6   2  272.33    6.67
   6 -14   2  287.61    4.10
  14   6  -2  276.19    6.61
   6 -14  -2  265.35    5.79
  14   6  -2  276.94    5.50
   6 -14   2  288.02    4.24
  14   6   3    0.29    0.45
  14   6  -3    0.57    0.60
  14   6  -3    0.06    0.31
   6 -14  -3   -0.17    0.43
  14   6   4   49.01    2.70
   6 -14  -4   51.60    2.60
  14   6  -4   49.92    2.40
  14   6  -4   47.33    2.56
  14   6   5    1.01    0.62
  14   6  -5   -0.24    0.50
  14   6  -5    1.16    0.61
  14   6  -6  105.56    4.01
  14   6   6   98.75    4.10
  14   6   7   -0.15    0.59
  14   6  -7   -0.31    0.57
  14   6  -8   59.12    3.31
  14   6   8   57.77    3.36
  14   6  -9    2.36    0.97
  14   6   9    1.74    0.66
  14   6 -10   12.21    1.72
  14   6  10   12.80    1.77
  14   6 -11    1.50    0.96
  14   7   0    0.41    0.23
  14   7   0    0.09    0.51
  14   7   1   13.90    0.66
  14   7  -1   13.25    0.98
  14   7   1   11.62    1.27
   7 -14   1   10.96    0.75
  14   7  -1   12.39    1.31
  14   7   2   22.44    1.80
  14   7  -2   21.72    1.71
   7 -14   2   25.65    0.99
  14   7  -2   22.55    1.41
   7 -14   3    5.10    0.38
  14   7   3    6.94    1.10
  14   7  -3    7.48    1.10
  14   7  -3    5.77    0.81
   7 -14  -3    5.60    0.89
  14   7   4    0.27    0.50
  14   7  -4   -0.16    0.46
  14   7  -4    0.41    0.36
   7 -14  -4    0.76    0.48
  14   7   5    9.32    1.31
  14   7  -5    7.98    1.11
  14   7  -5    8.83    1.19
  14   7   6   -0.29    0.60
  14   7  -6   -0.61    0.49
  14   7  -6    0.21    0.49
  14   7   7    4.19    0.98
  14   7  -7    2.58    0.78
  14   7  -8    5.02    1.17
  14   7   8    6.24    1.15
  14   7  -9   -0.03    0.69
  14   7   9    0.94    0.77
  14   7 -10   -0.06    0.62
  14   7  10   -0.78    0.83
  14   7 -11    0.99    0.82
  14   8   0   60.36    2.90
  14   8   1    9.52    1.19
  14   8   1    8.94    0.62
   8 -14   1    8.89    0.74
  14   8  -1    9.36    1.20
  14   8   2    8.22    1.14
  14   8   2    8.42    0.41
  14   8  -2    9.80    1.18
   8 -14   2    8.82    0.66
   8 -14   3   19.07    0.87
  14   8   3   16.22    1.57
  14   8  -3   14.68    1.43
  14   8  -3   16.30    1.35
  14   8   4   28.71    2.15
  14   8  -4   30.82    2.06
  14   8  -4   25.94    1.81
   8 -14   4   31.93    1.02
  14   8   5    0.06    0.55
  14   8  -5    0.36    0.57
  14   8  -5   -0.41    0.50
   8 -14   5    0.06    0.16
  14   8   6   14.18    1.64
  14   8  -6   15.15    1.57
  14   8  -6   14.92    1.56
  14   8  -7    5.81    1.06
  14   8  -7    8.42    1.32
  14   8   7    7.05    1.28
  14   8  -8    0.58    0.65
  14   8   8   -0.70    0.72
  14   8  -9    6.14    1.28
  14   8   9    5.04    1.12
  14   8 -10    2.30    0.96
  14   9   0    0.47    0.51
  14   9  -1   83.52    3.41
  14   9   1   81.73    3.40
   9 -14   1   78.28    2.41
  14   9   2    0.43    0.44
   9 -14   2    0.58    0.31
  14   9  -2    0.34    0.51
   9 -14   3   41.89    1.47
  14   9   3   37.77    2.40
  14   9   3   37.02    0.82
  14   9  -3   37.77    2.28
  14   9  -4    1.08    0.56
   9 -14   4    1.08    0.30
  14   9   4    0.81    0.66
  14   9   5    1.26    0.66
  14   9  -5    2.62    0.74
  14   9  -5    1.08    0.55
   9 -14   5    1.59    0.31
  14   9   6    1.61    0.73
  14   9  -6    2.51    0.68
  14   9  -6    3.75    0.99
  14   9  -7   44.29    2.67
  14   9  -7   44.72    2.87
  14   9   7   46.28    3.02
  14   9  -8   -0.11    0.51
  14   9  -8    0.64    0.68
  14   9   8    0.85    0.68
  14   9  -9    8.32    1.46
  14   9   9    7.02    1.33
  14   9 -10    0.84    0.79
  14  10   0  148.11    4.72
  10 -14   1   -0.13    0.30
  14  10  -1   -0.47    0.54
  14  10   1    0.14    0.51
  10 -14   2  156.55    3.60
  14  10   2  153.25    4.96
  14  10  -2  154.05    4.80
  14  10  -3    2.46    0.70
  14  10   3    4.35    0.95
  10 -14   3    3.38    0.52
  14  10  -4   27.62    1.97
  10 -14   4   29.11    1.30
  14  10   4   29.01    2.21
  14  10  -5    0.66    0.56
  10 -14   5    1.25    0.36
  14  10   5    1.36    0.82
  14  10  -6   47.12    2.68
  14  10   6   47.92    3.05
  14  10  -7    0.43    0.48
  14  10  -7    0.31    0.60
  14  10   7    1.11    0.71
  14  10  -8   25.27    2.06
  14  10  -8   27.33    2.41
  14  10   8   32.93    2.71
  14  10  -9    0.89    0.56
  14  10  -9    1.56    0.83
  14  10   9    0.91    0.66
  14  10 -10    3.30    1.08
  14  10 -10    3.22    0.98
  11 -14   0    0.36    0.45
  14  11   0    0.06    0.49
  11 -14   1    0.12    0.34
  14  11  -1   -0.20    0.54
  14  11   1    0.77    0.65
  11 -14   2    1.53    0.45
  14  11  -2    2.41    0.72
  14  11   2    0.17    0.50
  11 -14   3    7.39    0.78
  14  11  -3    9.58    1.28
  14  11   3    9.00    1.23
  14  11  -4    0.48    0.53
  11 -14   4    1.21    0.36
  14  11   4    1.12    0.60
  14  11  -5    0.18    0.51
  14  11   5    0.34    0.59
  14  11  -6    0.16    0.60
  14  11   6   -0.05    0.74
  14  11  -7    2.17    0.74
  14  11   7    0.32    0.64
  14  11  -8    1.17    0.65
  14  11  -8    1.57    0.81
  14  11   8    0.44    0.78
  14  11  -9    0.86    0.82
  14  11  -9    0.71    0.52
  14  11 -10    1.86    0.74
  12 -14   0    2.29    0.56
  14  12   0    3.14    0.80
  12 -14   1   13.12    1.14
  14  12  -1   14.83    1.50
  14  12   1   13.09    1.44
  12 -14   2   22.39    1.41
  14  12  -2   22.28    1.80
  14  12   2   21.03    1.86
  12 -14   3    6.94    0.81
  14  12  -3    6.74    1.06
  14  12   3    7.06    1.15
  14  12  -4   12.78    1.39
  14  12   4   11.82    1.43
  12 -14   4   14.86    1.08
  14  12  -5    3.93    0.86
  14  12   5    3.09    0.97
  14  12  -6    2.42    0.68
  14  12   6    1.75    0.60
  14  12  -7    1.41    0.58
  14  12   7    1.52    0.90
  14  12  -8    5.04    0.97
  14  12  -8    5.20    1.21
  14  12   8    4.12    1.11
  14  12  -9    3.52    1.09
  14  12  -9    4.52    1.10
  13 -14   0    0.19    0.42
  14  13   0    0.18    0.53
  13 -14   1   43.82    2.17
  14  13  -1   49.02    2.74
  14  13   1   47.90    2.72
  13 -14   2   24.80    1.59
  14  13   2   23.22    1.96
  14  13  -2   22.97    1.84
  13 -14   3   45.16    2.07
  14  13  -3   40.55    2.42
  14  13   3   38.73    2.60
  14  13  -4    1.59    0.70
  14  13   4    1.44    0.75
  13 -14   4    1.70    0.44
  14  13  -5   11.95    1.35
  14  13   5   14.12    1.70
  14  13  -6   -0.11    0.43
  14  13   6    0.80    0.78
  14  13  -7   11.53    1.31
  14  13   7   12.94    1.79
  14  13  -8   -0.30    0.51
  14  13  -9    4.61    1.30
  14 -14   0   57.81    2.70
  14  14   0   55.37    2.93
  14 -14  -1    0.12    0.42
  14 -14   1    0.01    0.39
  14  14   1   -0.24    0.55
  14  14  -1    1.14    0.64
  14 -14   2   39.02    2.06
  14  14  -2   42.89    2.48
  14  14   2   40.71    2.65
  14 -14   3    3.93    0.72
  14  14   3    4.18    0.95
  14  14  -3    3.60    0.84
  14  14  -4   26.12    1.97
  14  14   4   22.44    2.15
  14  14  -5    3.48    0.85
  14  14   5    1.76    0.84
  14  14  -6   16.98    1.58
  14  14   6   19.22    2.07
  14  14  -7    1.89    0.70
  14  14   7    1.40    0.74
  15 -14   0   -0.20    0.49
  14  15   0    0.79    0.74
  15 -14  -1    5.26    0.95
  15 -14   1    5.17    0.90
  14  15  -1    5.02    1.01
  14  15   1    4.75    0.96
  15 -14   2   -0.17    0.41
  14  15   2   -0.70    0.48
  14  15  -2    0.66    0.56
  15 -14   3    8.53    1.06
  14  15   3    8.90    1.40
  14  15  -3    7.38    1.10
  14  15  -4    0.92    0.64
  14  15   4    1.15    0.82
  14  15  -5    2.01    0.64
  14  15   5    2.37    0.94
  14  15   6   -0.37    0.63
  14  15   7    0.02    0.68
  15 -13   0    0.55    0.47
  13  15   0    2.69    0.69
  15 -13  -1   -0.26    0.50
  15 -13   1    0.81    0.66
  13  15  -1    1.04    0.56
  13  15   1    2.59    0.84
  15 -13   2    0.98    0.55
  13  15   2    0.76    0.63
  13  15  -2    0.02    0.42
  15 -13   3   -0.20    0.44
  13  15   3   -0.21    0.57
  13  15  -3   -0.60    0.61
  13  15  -4   -0.61    0.46
  15 -13   4    0.06    0.41
  13  15   4   -0.66    0.78
  13  15  -5    2.75    0.74
  13  15   5    3.30    1.06
  13  15   6    2.59    0.89
  13  15   7    4.78    1.25
  15 -12   0    3.17    0.73
  12  15   0   -0.19    0.56
  15 -12  -1   50.62    2.73
  15 -12   1   56.70    2.73
  12  15  -1   56.08    2.71
  12  15   1   52.86    2.73
  15 -12   2    0.82    0.51
  12  15   2   -0.01    0.54
  12  15  -2    0.25    0.49
  12  15  -3   41.61    2.26
  15 -12   3   37.45    2.13
  12  15   3   40.00    2.61
  15 -12   4    4.21    0.75
  12  15  -4    3.64    0.70
  12  15   4    4.56    0.97
  12  15  -5   43.82    2.29
  15 -12   5   40.38    2.20
  12  15   5   42.60    2.82
  12  15  -6    1.58    0.60
  15 -12   6    2.04    0.62
  12  15   6    1.67    0.81
  12  15   7   14.53    1.81
  12  15   8    1.86    0.91
  15 -11   0   48.07    2.55
  11  15   0   42.64    2.33
  15 -11  -1    0.63    0.52
  15 -11   1    1.48    0.54
  11  15  -1    0.39    0.46
  11  15   1    0.38    0.43
  15 -11   2   98.07    3.59
  11  15  -2  102.48    3.50
  11  15   2  101.86    3.93
  15 -11   3    0.73    0.47
  11  15  -3    0.09    0.40
  11  15   3   -0.17    0.53
  15 -11   4  103.87    3.65
  11  15  -4  108.74    3.50
  11  15   4   99.65    4.18
  11  15  -5    0.96    0.47
  15 -11   5    0.75    0.48
  11  15   5    0.06    0.55
  11  15  -6   46.61    2.28
  15 -11   6   39.37    2.26
  11  15   6   47.17    3.20
  15 -11   7    1.04    0.55
  11  15   7    0.57    0.75
  11  15   8   23.52    2.35
  15 -10   0    0.19    0.42
  10  15   0    0.17    0.49
  15 -10  -1    2.85    0.73
  15 -10   1    4.13    0.81
  10  15   1    2.48    0.65
  10  15  -1    3.31    0.69
  15 -10   2    0.06    0.39
  10  15  -2    0.07    0.43
  10  15   2   -0.01    0.49
  15 -10   3    1.10    0.50
  10  15  -3    1.69    0.45
  10  15   3    0.88    0.61
  15 -10   4    6.03    0.94
  10  15  -4    7.18    0.88
  10  15   4    7.67    1.20
  10  15  -5    2.08    0.57
  15 -10   5    2.94    0.73
  10  15   5    3.03    0.89
  10  15  -6    6.75    0.85
  15 -10   6    6.35    0.97
  10  15   6    6.93    1.31
  15 -10   7   -0.13    0.49
  10  15   7    0.29    0.61
  15 -10   8    8.07    1.10
  10  15   8    8.58    1.50
  10  15   9    3.64    1.08
  -9 -15   0    0.43    0.34
  15  -9   0    0.37    0.44
   9  15   0    0.40    0.41
  15  -9  -1   16.54    1.56
  -9 -15  -1   18.25    1.42
  15  -9   1   12.75    1.29
   9  15  -1   17.61    1.38
   9  15   1   16.56    1.40
  15  -9   2    0.80    0.47
   9  15  -2    0.92    0.35
   9  15   2    0.46    0.47
  15  -9   3    1.06    0.50
   9  15  -3    0.67    0.31
   9  15   3    3.03    0.79
   9  15  -4   -0.03    0.33
  15  -9   4    0.57    0.48
   9  15   4   -0.05    0.55
   9  15  -5   22.31    1.38
  15  -9   5   21.78    1.72
   9  15   5   21.27    1.88
   9  15  -6    1.44    0.49
  15  -9   6    1.48    0.63
   9  15   6    1.05    0.79
  15  -9   7   12.92    1.35
   9  15   7   12.28    1.62
  15  -9   8    1.14    0.60
   9  15   8    1.63    0.80
   9  15   9    6.48    1.42
  15  -9   9    6.12    1.08
  -8 -15   0    0.70    0.44
  15  -8   0   -0.80    0.59
   8  15   0   -0.45    0.44
  -8 -15  -1   25.24    1.61
  15  -8   1   23.70    1.74
  15  -8  -1   24.99    1.87
   8  15  -1   26.09    1.50
   8  15   1   26.60    1.71
  15  -8   2    2.40    0.65
  -8 -15  -2    3.09    0.68
   8  15  -2    2.65    0.52
   8  15   2    3.06    0.75
  15  -8   3  161.66    4.78
   8  15  -3  170.79    3.97
   8  15   3  170.46    4.95
  15  -8   4    0.50    0.52
   8  15  -4   -0.02    0.32
   8  15   4    0.96    0.56
  15  -8   5  124.05    4.18
   8  15  -5  137.10    3.35
   8  15   5  124.14    4.59
   8  15  -6    0.31    0.34
  15  -8   6   -0.24    0.48
   8  15   6    0.42    0.61
   8  15   7   30.72    2.54
  15  -8   7   27.08    1.99
  15  -8   8    1.34    0.64
   8  15   8   -0.35    0.84
   8  15   9   29.09    2.63
  15  -8   9   29.63    2.22
  15  -8  10    1.94    0.80
  15  -7   0   57.45    2.79
  -7 -15   0   61.31    2.34
   7  15   0   61.90    2.42
  -7 -15  -1   -0.01    0.38
  15  -7  -1   -0.96    0.60
  15  -7   1   -0.69    0.51
   7  15  -1    0.27    0.33
   7  15   1   -0.10    0.42
  15  -7   2  100.65    3.64
  -7 -15  -2  104.51    3.44
 -15   7   2  101.44    3.51
   7  15  -2  103.67    2.83
   7  15   2  102.81    3.50
  -7 -15  -3   20.22    1.55
  15  -7   3   18.94    1.59
   7  15  -3   21.66    1.21
   7  15   3   20.09    1.59
   7  15  -4   95.91    2.57
  15  -7   4   91.80    3.51
   7  15   4   92.48    3.65
  15  -7   5    0.92    0.43
   7  15  -5    1.19    0.38
   7  15   5    1.30    0.71
  15  -7   6   81.47    3.40
   7  15  -6   83.78    2.35
   7  15   6   90.37    4.11
  15  -7   7    3.76    0.81
   7  15   7    3.18    0.98
   7  15   8   59.00    3.45
  15  -7   8   54.13    2.91
  15  -7   9    2.76    0.87
   7  15   9    2.85    1.00
  15  -7  10   10.57    1.45
  15  -7  11   -0.02    0.71
  -6 -15   0   -0.11    0.32
  15  -6   0    0.43    0.47
   6  15   0    0.40    0.35
  -6 -15  -1    7.68    0.88
  15  -6   1    8.06    1.07
  15  -6  -1    8.59    1.16
 -15   6   1    7.52    0.90
   6  15  -1    6.88    0.74
   6  15   1    7.60    0.89
  -6 -15  -2   14.53    1.20
  15  -6   2   14.58    1.40
 -15   6   2   15.57    1.32
   6  15   2   14.31    1.26
   6  15  -2   15.14    0.97
  15  -6   3   21.90    1.71
  -6 -15  -3   20.03    1.50
 -15   6   3   21.67    1.60
   6  15   3   22.22    1.65
   6  15  -3   20.53    1.02
  15  -6   4    2.56    0.68
   6  15  -4    2.44    0.40
   6  15   4    0.68    0.51
  15  -6   5    2.90    0.74
   6  15  -5    3.64    0.43
   6  15   5    3.12    0.80
   6  15  -6   37.31    1.31
  15  -6   6   34.26    2.21
   6  15   6   34.99    2.43
  15  -6   7    0.07    0.50
   6  15   7   -0.89    0.67
  15  -6   8   10.91    1.32
   6  15   8   12.00    1.57
  15  -6   9    1.72    0.82
  15  -6  10    2.25    0.80
  15  -6  11    1.10    0.82
  15  -6  12    3.83    1.11
  15  -5   0   37.22    2.22
  -5 -15   0   37.51    1.64
 -15   5   0   37.54    1.77
   5  15   0   41.13    1.78
  -5 -15  -1    0.34    0.35
  15  -5   1   -0.22    0.42
  15  -5  -1    1.02    0.63
 -15   5   1    0.92    0.44
   5  15   1    0.74    0.45
   5  15  -1    0.64    0.29
  -5 -15  -2    2.09    0.51
  15  -5   2    2.51    0.64
 -15   5   2    1.96    0.51
   5  15   2    1.66    0.52
   5  15  -2    2.79    0.41
  -5 -15  -3    4.63    0.75
  15  -5   3    7.05    1.01
 -15   5   3    4.51    0.77
   5  15  -3    6.04    0.51
   5  15   3    5.16    0.82
   5  15  -4    2.06    0.32
  15  -5   4    2.33    0.72
  -5 -15  -4    1.88    0.55
   5  15   4    1.80    0.61
  15  -5   5    0.99    0.56
   5  15  -5    0.64    0.21
   5  15   5    0.02    0.49
  15  -5   6    1.28    0.66
   5  15  -6    0.88    0.22
   5  15   6   -0.09    0.52
  15  -5   7   18.71    1.71
   5  15   7   18.30    1.83
  15  -5   8    0.77    0.59
  15  -5   9   10.89    1.45
  15  -5  10    2.11    0.82
  15  -5  11    3.07    0.87
  15  -5  12   -1.17    0.62
  -4 -15   0    0.25    0.29
  15  -4   0    0.02    0.43
 -15   4   0    0.04    0.29
   4  15   0    0.29    0.32
  -4 -15  -1  218.52    4.61
  15  -4  -1  216.94    5.79
  15  -4   1  210.03    5.59
 -15   4  -1  218.91    4.35
 -15   4   1  214.41    4.81
   4  15   1  224.75    4.91
   4  15  -1  217.28    4.16
  -4 -15  -2   52.94    2.19
  15  -4   2   49.44    2.54
  15  -4  -2   50.01    2.68
   4  15   2   52.93    2.36
 -15   4   2   47.73    2.20
   4  15  -2   50.28    1.52
  -4 -15  -3  193.73    4.80
  15  -4   3  186.54    5.24
   4  15   3  187.46    4.93
 -15   4   3  186.74    4.93
   4  15  -3  192.43    3.07
  -4 -15  -4   11.26    1.17
  15  -4   4   11.87    1.31
 -15   4   4    9.00    1.09
   4  15   4    9.42    1.13
  15  -4   5  117.07    4.17
   4  15   5  126.03    4.34
  15  -4   6   -0.02    0.51
  15  -4   7   77.69    3.53
  15  -4   8    0.29    0.59
  15  -4   9   39.46    2.65
  15  -4  10    0.01    0.61
  15  -4  11   25.73    2.30
  15  -4  12   -0.29    0.63
  15  -3   0   68.09    2.99
  -3 -15   0   70.56    2.07
   3  15   0   70.54    2.20
 -15   3   0   70.82    2.27
  15  -3  -1    0.74    0.52
  15  -3   1    1.12    0.53
  -3 -15  -1    1.71    0.46
 -15   3  -1    0.78    0.26
 -15   3   1    1.26    0.38
   3  15  -1    2.17    0.38
   3  15   1    0.90    0.41
  -3 -15  -2  105.05    3.13
  15  -3  -2  109.91    4.02
  15  -3   2  106.30    3.81
   3  15   2  108.01    3.30
 -15   3  -2  107.56    2.44
 -15   3   2   99.39    3.21
  -3 -15  -3    4.05    0.72
  15  -3   3    3.50    0.79
 -15   3   3    2.93    0.66
   3  15   3    3.17    0.66
  15  -3   4  150.78    4.69
  -3 -15  -4  155.61    4.44
 -15   3   4  153.66    4.58
  15  -3   5   17.20    1.60
  15  -3   6   62.80    3.07
  15  -3   7    0.29    0.66
  15  -3   8   21.68    1.94
  15  -3   9    0.62    0.68
  15  -3  10    8.86    1.46
  15  -3  11    1.49    0.82
  15  -3  12    5.99    1.22
 -15   2   0   -0.26    0.26
  15  -2   0    0.72    0.55
  -2 -15   0    0.31    0.25
 -15   2  -1    1.23    0.32
 -15   2   1    0.41    0.29
  -2 -15   1    0.73    0.21
  15  -2   1   -0.15    0.47
  -2 -15  -1    0.62    0.27
  15  -2  -1    1.05    0.57
  -2 -15  -2   47.24    1.98
  15  -2   2   44.28    2.44
 -15   2  -2   45.15    1.30
 -15   2   2   43.05    2.00
  15  -2  -2   42.64    2.45
  -2 -15  -3    1.14    0.39
 -15   2  -3    1.02    0.17
  15  -2   3    1.90    0.60
  -2 -15  -4    3.51    0.72
  15  -2   4    2.92    0.81
  15  -2   5    0.32    0.49
  15  -2   6   15.55    1.54
 -15   2  -6   13.59    0.50
  15  -2   7   -0.14    0.57
  15  -2   8    8.27    1.31
  15  -2   9   20.72    1.94
  15  -2  10   16.67    1.86
  15  -2  11    3.24    0.98
  15  -1   0   46.05    2.49
  -1 -15   0   47.90    1.54
  15  -1   1   -0.88    0.56
  -1 -15   1   -0.07    0.14
  15  -1  -1   -0.04    0.46
  -1 -15  -1   -0.21    0.36
  15  -1   2   12.40    1.32
  15  -1  -2   11.47    1.33
  -1 -15  -2   11.39    0.95
  15  -1   3   18.34    1.61
  -1 -15  -3   15.86    1.24
  15  -1   4    8.56    1.13
  -1 -15  -4    8.39    0.95
  15  -1   5    0.67    0.45
  15  -1   6   10.37    1.31
  15  -1   7   18.89    1.81
  15  -1   8    2.93    0.80
  15  -1   9    4.82    1.11
  15  -1  10    0.57    0.75
  15  -1  11    2.05    0.77
   0 -15   0   -0.13    0.19
  15   0   0   -0.56    0.54
  15   0  -1  152.44    4.74
   0 -15   1  155.96    2.41
  15   0   1  152.12    4.67
   0 -15  -1  156.35    3.44
  15   0  -2   -0.17    0.47
  15   0   2    0.22    0.46
   0 -15  -2    0.01    0.29
  15   0  -3  281.06    6.92
  15   0   3  286.31    6.81
   0 -15  -3  275.46    5.83
   0 -15  -4    4.21    0.71
  15   0   4    4.69    0.91
  15   0   5  220.77    6.09
   0 -15  -5  223.57    5.74
  15   0   6    1.88    0.60
  15   0   7  111.00    4.38
  15   0   8    1.75    0.85
  15   0   9   39.82    2.76
  15   0  10    1.41    0.78
  15   0  11   58.49    3.65
  15   1   0  122.95    4.19
   1 -15   0  130.37    2.66
  15   1  -1   26.25    1.90
  15   1   1   26.01    1.88
   1 -15   1   25.53    0.67
   1 -15  -1   26.26    1.26
  15   1  -2   47.20    2.55
  15   1   2   48.28    2.60
   1 -15  -2   45.63    1.88
  15   1  -3    3.34    0.84
  15   1   3    4.01    0.90
   1 -15  -3    3.11    0.55
  15   1   4   28.62    2.05
   1 -15  -4   28.09    1.77
  15   1   5    2.49    0.70
   1 -15  -5    2.69    0.69
  15   1   6   82.64    3.65
  15   1   7   -0.07    0.56
  15   1   8   17.92    1.83
  15   1   9   11.13    1.53
  15   1  10   15.34    1.79
  15   1  11    0.41    0.68
  15   2   0    0.58    0.62
   2 -15   0   -0.23    0.25
  15   2   1   14.01    1.43
  15   2  -1   13.32    1.35
   2 -15   1   13.75    0.47
   2 -15  -1   14.12    0.92
  15   2   2   12.76    1.36
  15   2  -2   10.45    1.24
   2 -15  -2   10.99    0.94
  15   2  -3   80.91    3.47
  15   2   3   83.84    3.47
   2 -15  -3   78.43    2.82
  15   2  -4   16.34    1.62
  15   2   4   18.19    1.66
   2 -15  -4   20.38    1.55
  15   2   5    6.88    1.10
  15   2   6   62.29    3.21
  15   2   7    1.78    0.82
  15   2   8   30.30    2.37
  15   2   9    1.33    0.82
  15   2  10    5.01    1.12
  15   2  11    3.02    1.03
  15   3   0   48.84    2.59
   3 -15   0   53.04    1.59
  15   3  -1    5.04    0.88
  15   3   1    4.97    0.90
   3 -15   1    4.25    0.29
   3 -15  -1    4.41    0.54
  15   3  -2   34.08    2.21
  15   3   2   31.22    2.10
   3 -15  -2   31.12    1.62
  15   3  -3    8.97    1.23
  15   3   3    7.31    1.09
   3 -15  -3    6.53    0.81
  15   3  -4   11.77    1.35
  15   3   4   10.64    1.33
   3 -15  -4   10.57    1.14
  15   3   5    7.81    1.15
  15   3  -5    7.57    1.02
  15   3   6   69.17    3.43
  15   3  -6   68.77    3.12
  15   3   7    3.70    0.89
  15   3  -7    3.26    0.82
  15   3   8   12.22    1.58
  15   3  -8   10.49    1.45
  15   3  -9    0.13    0.67
  15   3   9    1.63    0.82
  15   3  10    5.01    1.20
  15   4   0   -0.83    0.57
   4 -15   0    0.15    0.21
  15   4  -1  212.60    5.74
  15   4   1  216.36    5.85
   4 -15   1  208.94    3.21
   4 -15  -1  209.16    4.34
  15   4  -2    0.54    0.56
  15   4   2    0.63    0.62
   4 -15  -2   -0.21    0.29
  15   4   3  232.22    6.21
  15   4  -3  241.76    6.26
  15   4  -3  239.63    5.20
   4 -15  -3  227.20    5.35
  15   4   4    2.50    0.79
  15   4  -4    1.12    0.58
  15   4  -4    1.44    0.46
   4 -15  -4    2.01    0.61
  15   4   5  162.85    5.29
  15   4  -5  160.01    4.71
  15   4  -5  166.88    5.30
  15   4   6    1.87    0.82
  15   4  -6    1.41    0.71
  15   4  -7  126.71    4.64
  15   4   7  128.18    4.85
  15   4   8    1.14    0.66
  15   4  -8    0.19    0.55
  15   4  -9   57.55    3.41
  15   4   9   59.37    3.53
  15   4 -10    1.69    0.75
  15   4  10    2.66    0.91
  15   4 -11   25.08    2.51
  15   5   0   34.92    2.23
   5 -15   0   35.42    1.43
  15   5  -1    9.43    1.23
  15   5   1    9.79    1.21
   5 -15   1    9.17    0.55
   5 -15   1    8.67    0.56
   5 -15  -1    7.82    0.77
  15   5   2   64.65    3.09
  15   5  -2   64.94    3.03
  15   5  -2   62.21    2.21
   5 -15  -2   61.07    2.44
  15   5   3    1.09    0.53
  15   5  -3    0.34    0.53
  15   5  -3    1.49    0.43
   5 -15  -3    1.47    0.46
  15   5   4    9.58    1.25
  15   5  -4   11.27    1.31
  15   5  -4    9.89    1.08
   5 -15  -4    9.40    1.13
  15   5   5    0.56    0.59
  15   5  -5    0.38    0.53
  15   5  -5    0.14    0.49
  15   5  -6   36.13    2.30
  15   5   6   35.57    2.55
  15   5   7    8.10    1.31
  15   5  -7    6.73    1.06
  15   5  -8   10.22    1.46
  15   5   8   11.61    1.62
  15   5  -9    1.84    0.94
  15   5   9    2.36    1.01
  15   5 -10    0.56    0.60
  15   5  10    2.43    1.18
  15   5 -11    1.59    0.98
  15   6   0    0.44    0.60
   6 -15   0   -0.39    0.31
  15   6  -1    1.20    0.62
  15   6   1    0.75    0.55
   6 -15   1    0.37    0.24
  15   6  -1    0.75    0.32
   6 -15  -1    0.27    0.37
   6 -15   1    1.17    0.31
  15   6   2   25.41    1.94
   6 -15   2   26.00    0.74
  15   6  -2   22.33    1.80
   6 -15  -2   26.49    1.75
  15   6  -2   24.07    1.40
   6 -15   2   25.28    0.78
  15   6   3    9.69    1.26
  15   6  -3    9.60    1.20
  15   6  -3    8.26    0.87
   6 -15  -3    9.81    1.15
  15   6   4    5.51    1.00
  15   6  -4    5.22    0.99
  15   6  -4    4.83    0.81
   6 -15  -4    4.61    0.84
  15   6   5    0.19    0.61
  15   6  -5    0.07    0.45
  15   6  -5    0.96    0.65
  15   6   6    1.60    0.84
  15   6  -6    0.80    0.49
  15   6  -6    0.40    0.57
  15   6   7    3.50    0.98
  15   6  -7    2.36    0.74
  15   6  -8   28.43    2.35
  15   6   8   25.20    2.29
  15   6  -9    2.67    0.94
  15   6   9    3.41    1.12
  15   6 -10   10.25    1.56
  15   7   0   23.82    1.84
   7 -15   0   24.28    1.34
  15   7   0   25.70    1.12
   7 -15   1    0.37    0.27
  15   7   1    0.49    0.62
  15   7  -1    0.23    0.63
  15   7  -1    0.70    0.38
   7 -15   1    0.07    0.26
   7 -15  -1    0.16    0.35
  15   7   2  170.83    5.28
   7 -15   2  185.92    3.10
  15   7  -2  175.73    5.27
   7 -15   2  177.23    3.19
   7 -15  -2  171.46    4.58
  15   7  -2  181.07    4.28
  15   7   3    0.41    0.55
  15   7  -3    0.65    0.56
  15   7  -3    0.19    0.34
   7 -15  -3    1.13    0.47
  15   7   4   20.74    1.86
   7 -15  -4   22.34    1.79
  15   7  -4   17.92    1.48
  15   7  -4   22.72    1.85
  15   7   5    5.68    1.14
  15   7  -5    5.16    1.00
  15   7  -5    5.01    0.93
  15   7  -6   18.39    1.74
  15   7  -6   21.61    1.83
  15   7   6   21.21    1.91
  15   7   7    2.24    0.86
  15   7  -7    0.86    0.51
  15   7  -7    1.74    0.68
  15   7  -8   22.49    2.11
  15   7   8   21.61    2.18
  15   7  -9    2.32    0.86
  15   7   9    3.04    0.95
  15   7 -10   12.88    1.74
  15   8   0    0.09    0.26
  15   8   0    0.24    0.57
  15   8  -1  218.55    5.96
  15   8   1  217.46    6.02
  15   8   1  221.11    3.56
  15   8  -1  220.45    4.62
   8 -15   1  216.75    4.18
  15   8   2    0.38    0.56
  15   8  -2    0.14    0.38
  15   8  -2    0.83    0.57
   8 -15   2    0.88    0.30
   8 -15   3  225.72    3.57
  15   8   3  220.48    6.26
   8 -15  -3  222.14    5.74
  15   8  -3  225.52    5.45
  15   8  -3  227.69    6.12
  15   8   4   10.26    1.39
  15   8  -4    9.60    1.26
  15   8  -4    9.73    1.13
  15   8  -5  121.42    4.43
  15   8  -5  115.86    4.18
  15   8   5  114.60    4.62
  15   8   6    6.57    1.20
  15   8  -6    4.71    0.98
  15   8  -6    3.38    0.79
  15   8  -7   34.29    2.48
  15   8  -7   41.27    2.70
  15   8   7   40.61    2.87
  15   8  -8    1.13    0.65
  15   8  -8    1.06    0.62
  15   8   8    1.00    0.61
  15   8  -9   30.77    2.59
  15   8   9   31.65    2.72
  15   8 -10    0.78    0.80
  15   9   0    9.51    0.81
  15   9   0    9.13    1.19
  15   9   1   16.86    1.62
  15   9   1   15.71    0.86
   9 -15   1   15.70    1.02
  15   9  -1   16.25    1.56
  15   9  -2   45.89    2.62
  15   9   2   44.91    2.66
  15   9   2   45.47    1.06
  15   9  -2   45.21    2.14
   9 -15   2   46.17    1.63
   9 -15   3    0.67    0.25
  15   9   3   -0.11    0.53
  15   9  -3    1.68    0.59
  15   9  -3    0.57    0.46
  15   9   4   32.76    2.37
  15   9  -4   32.46    2.08
  15   9  -4   27.28    2.08
  15   9   5    4.02    1.01
  15   9  -5    4.84    0.95
  15   9  -5    3.38    0.81
  15   9   6   -0.39    0.77
  15   9  -6    0.14    0.62
  15   9  -6    0.28    0.59
  15   9  -7   15.79    1.75
  15   9  -7   17.26    1.84
  15   9   7   18.55    2.01
  15   9  -8    0.41    0.58
  15   9  -8    0.20    0.62
  15   9   8    1.02    0.71
  15   9  -9    2.70    0.94
  15   9  -9    2.15    0.92
  15   9 -10    0.11    0.76
  15  10   0    0.92    0.67
  10 -15   0    0.67    0.38
  15  10   1    5.02    0.96
  10 -15   1    4.62    0.62
  15  10  -1    2.96    0.78
  15  10   2   -0.09    0.69
  15  10  -2    0.50    0.56
  10 -15   2    0.45    0.35
  10 -15   3    2.45    0.40
  15  10   3    2.63    0.85
  15  10  -3    2.49    0.71
  15  10   4    4.36    1.05
  15  10  -4    2.74    0.76
  15  10   5    9.06    1.35
  15  10  -5   10.33    1.28
  15  10  -5   11.03    1.36
  15  10   6   13.13    1.65
  15  10  -6   11.73    1.44
  15  10  -6    9.41    1.29
  15  10  -7    1.05    0.63
  15  10  -7    0.53    0.59
  15  10   7    0.64    0.59
  15  10  -8    5.96    1.13
  15  10  -8    7.90    1.42
  15  10   8    7.27    1.37
  15  10  -9   -0.12    0.68
  15  10  -9   -1.15    0.74
  15  10 -10    3.44    1.00
  11 -15   0  108.45    3.36
  15  11   0  106.60    4.13
  11 -15   1    3.51    0.62
  15  11   1    0.67    0.54
  15  11  -1    1.90    0.66
  11 -15   2   50.85    1.98
  15  11  -2   48.37    2.71
  15  11   2   47.52    2.81
  15  11  -3    5.44    0.99
  15  11   3    5.87    1.13
  11 -15   3    5.65    0.66
  15  11  -4   29.22    2.13
  15  11   4   28.78    2.29
  15  11  -5    1.32    0.67
  15  11   5    3.15    1.08
  15  11  -6   54.99    2.99
  15  11  -6   64.54    3.40
  15  11   6   62.20    3.59
  15  11  -7    0.17    0.50
  15  11  -7    0.57    0.70
  15  11   7    0.64    0.72
  15  11  -8   21.02    1.95
  15  11  -8   20.97    2.18
  15  11   8   23.25    2.34
  15  11  -9    0.27    0.60
  15  11  -9   -0.50    0.74
  12 -15   0    0.19    0.35
  15  12   0    0.17    0.50
  12 -15   1  113.30    3.39
  15  12  -1  104.33    4.09
  15  12   1  109.94    4.30
  15  12  -2    6.05    1.07
  12 -15   2    6.60    0.81
  15  12   2    4.13    0.91
  15  12  -3   62.30    3.11
  15  12   3   56.79    3.17
  12 -15   3   63.94    2.30
  15  12  -4    0.64    0.55
  15  12   4    0.61    0.72
  15  12  -5   87.19    3.74
  15  12   5   88.00    4.22
  15  12  -6    3.28    0.89
  15  12   6    4.13    1.07
  15  12  -7   40.60    2.63
  15  12  -7   40.63    2.88
  15  12   7   41.98    3.06
  15  12  -8   -0.20    0.68
  15  12  -8    0.92    0.64
  15  12  -9   21.54    2.34
  15  12  -9   18.45    1.84
  13 -15   0    1.57    0.53
  15  13   0    1.71    0.69
  13 -15   1    5.43    0.81
  15  13   1    6.06    1.06
  15  13  -1    3.38    0.90
  13 -15   2    0.68    0.49
  15  13   2    0.06    0.62
  15  13  -2   -0.51    0.47
  15  13  -3    0.74    0.62
  15  13   3    0.14    0.73
  15  13  -4    1.36    0.65
  15  13   4    2.57    0.96
  15  13  -5    9.76    1.26
  15  13   5    9.89    1.54
  15  13  -6    1.72    0.67
  15  13   6    1.96    0.85
  15  13  -7    2.31    0.71
  15  13   7    3.56    1.08
  15  13  -8    3.01    1.15
  14 -15   0    0.48    0.57
  15  14   0    0.13    0.53
  14 -15   1    0.62    0.38
  14 -15  -1   -0.54    0.46
  15  14  -1   -0.81    0.53
  15  14   1   -0.06    0.55
  14 -15   2    1.40    0.55
  15  14  -2   -0.23    0.61
  15  14   2   -0.56    0.63
  15  14   3    0.34    0.55
  15  14  -3    0.79    0.63
  15  14  -4    6.62    1.10
  15  14   4    6.65    1.29
  15  14  -5    0.15    0.52
  15  14   5    0.09    0.61
  15  14  -6    7.75    1.15
  15  14   6    7.71    1.37
  15 -15   0  141.87    4.55
  15  15   0  141.67    5.01
  15 -15   1    3.21    0.82
  15 -15  -1    1.92    0.65
  15  15  -1    1.61    0.77
  15  15   1    2.77    0.96
  15  15  -2   29.66    2.19
  15  15   2   27.54    2.24
  15  15   3    0.87    0.64
  15  15  -3    1.15    0.73
  15  15  -4   34.22    2.34
  15  15   4   31.51    2.53
  15  15  -5    0.86    0.64
  15  15   5    2.01    1.09
  15  15   6   39.47    3.05
  16 -15   0    0.01    0.48
  15  16   0    0.54    0.67
  16 -15  -1   58.22    3.03
  16 -15   1   57.66    2.83
  15  16  -1   56.51    3.08
  15  16   1   55.54    3.17
  16 -15  -2    1.29    0.71
  15  16   2    1.30    0.79
  15  16  -2    0.31    0.54
  15  16  -3   24.82    1.97
  15  16   3   21.35    2.05
  15  16  -4    0.31    0.55
  15  16   4    0.36    0.64
  15  16   5   37.17    2.86
  16 -14   0    0.65    0.56
  14  16   0    1.20    0.63
  16 -14  -1   10.25    1.34
  16 -14   1   11.05    1.32
  14  16  -1   13.34    1.49
  14  16   1   10.58    1.34
  16 -14  -2    2.25    0.80
  16 -14   2    2.94    0.79
  14  16   2    2.24    0.82
  14  16  -2    2.99    0.74
  14  16  -3    2.78    0.82
  14  16   3    1.33    0.74
  14  16  -4    0.86    0.42
  14  16   4    3.25    1.09
  14  16   5    0.04    0.66
  14  16   6   -0.24    0.73
  16 -13   0   -0.03    0.49
  13  16   0   -0.10    0.48
  16 -13   1    0.23    0.45
  16 -13  -1    1.23    0.67
  13  16  -1    0.80    0.52
  13  16   1    0.63    0.55
  16 -13  -2   10.93    1.44
  16 -13   2   14.01    1.37
  13  16   2   12.37    1.52
  13  16  -2   12.65    1.36
  16 -13   3    3.54    0.78
  13  16  -3    2.64    0.70
  13  16   3    5.37    1.06
  13  16  -4    0.20    0.49
  16 -13   4    0.74    0.50
  13  16   4   -0.61    0.71
  13  16   5    1.75    0.86
  13  16   6    0.64    0.69
  13  16   7    1.08    0.82
  16 -12   0   65.56    3.13
  12  16   0   69.64    3.11
  16 -12   1    0.69    0.58
  16 -12  -1    0.44    0.60
  12  16   1   -0.50    0.55
  12  16  -1    0.43    0.57
  16 -12   2   15.21    1.45
  12  16  -2   16.66    1.49
  12  16   2   15.13    1.57
  16 -12   3    1.27    0.67
  12  16  -3    0.96    0.54
  12  16   3    1.41    0.74
  12  16  -4   18.67    1.48
  16 -12   4   19.29    1.60
  12  16   4   17.31    1.85
  16 -12   5   -0.29    0.43
  12  16   5    0.60    0.67
  12  16   6   24.94    2.32
  12  16   7    0.85    0.78
  16 -11   0   -0.32    0.49
  11  16   0    0.34    0.44
  16 -11   1   62.13    2.98
  16 -11  -1   60.34    3.07
  11  16   1   69.38    3.12
  11  16  -1   69.47    2.94
  16 -11   2    0.31    0.44
  11  16  -2   -0.58    0.47
  11  16   2   -0.63    0.62
  11  16  -3   56.55    2.51
  16 -11   3   56.95    2.78
  11  16   3   57.59    3.05
  11  16  -4    0.79    0.49
  16 -11   4   -0.84    0.55
  11  16   4    0.32    0.70
  16 -11   5   45.91    2.52
  11  16   5   45.34    2.90
  16 -11   6    0.83    0.43
  11  16   6   -0.77    0.66
  11  16   7   17.96    2.04
  11  16   8    1.60    0.87
  16 -10   0   24.48    1.93
  10  16   0   29.71    1.91
  16 -10   1   -0.88    0.61
  16 -10  -1    0.82    0.63
  10  16  -1    0.44    0.42
  10  16   1    0.02    0.43
  16 -10   2    4.37    0.87
  10  16  -2    3.65    0.68
  10  16   2    5.17    0.95
  16 -10   3    1.16    0.59
  10  16  -3    0.23    0.35
  10  16   3    0.60    0.61
  16 -10   4    1.45    0.62
  10  16  -4    1.06    0.45
  10  16   4   -0.18    0.63
  16 -10   5    1.39    0.55
  10  16   5    1.99    0.84
  16 -10   6    0.40    0.44
  10  16   6   -0.48    0.59
  16 -10   7   14.68    1.45
  10  16   7   15.12    1.82
  10  16   8   -0.49    0.97
  16  -9   0    0.57    0.53
   9  16   0   -0.22    0.37
  -9 -16  -1    1.67    0.57
  16  -9   1    1.59    0.64
  16  -9  -1    0.28    0.48
   9  16  -1    1.49    0.51
   9  16   1    0.96    0.47
  16  -9   2    2.43    0.69
   9  16  -2    1.90    0.48
   9  16   2    3.40    0.83
  16  -9   3    3.66    0.78
   9  16  -3    3.69    0.61
   9  16   3    3.55    0.80
   9  16  -4    1.75    0.47
  16  -9   4    1.70    0.57
   9  16   4    1.85    0.82
  16  -9   5    0.36    0.46
   9  16   5    1.01    0.73
  16  -9   6    0.57    0.49
   9  16   6    2.50    0.90
  16  -9   7    1.79    0.72
   9  16   7    0.65    0.68
  16  -9   8   17.06    1.66
   9  16   8   16.27    2.03
  16  -9   9    2.09    0.77
   9  16   9    3.52    1.15
  16  -8   0   35.19    2.24
  -8 -16   0   33.59    1.83
   8  16   0   39.41    2.02
  16  -8  -1    1.51    0.61
  16  -8   1    1.13    0.60
  -8 -16  -1    0.88    0.53
   8  16  -1    1.36    0.46
   8  16   1    0.70    0.51
  16  -8  -2   37.56    2.50
  16  -8   2   44.54    2.47
  -8 -16  -2   42.38    2.25
   8  16  -2   46.70    1.96
   8  16   2   47.32    2.42
  16  -8   3   -0.60    0.57
   8  16  -3    0.22    0.29
   8  16   3    0.31    0.43
   8  16  -4  133.35    3.31
  16  -8   4  121.52    4.25
   8  16   4  125.46    4.47
  16  -8   5    1.96    0.67
   8  16   5    2.56    0.82
  16  -8   6   37.44    2.33
   8  16   6   41.65    2.81
  16  -8   7    0.81    0.57
   8  16   7    0.63    0.60
  16  -8   8   10.53    1.36
   8  16   8   12.17    1.70
   8  16   9    1.29    0.88
  16  -8   9   -0.30    0.70
  -7 -16   0    0.21    0.35
  16  -7   0    0.84    0.54
   7  16   0   -0.08    0.35
  -7 -16  -1   62.07    2.50
  16  -7  -1   63.25    3.10
  16  -7   1   63.73    2.99
 -16   7   1   63.33    2.67
   7  16  -1   63.39    2.35
   7  16   1   63.72    2.62
  -7 -16  -2    6.62    0.94
  16  -7  -2    7.50    1.15
  16  -7   2    6.43    0.98
 -16   7   2    6.01    0.92
   7  16  -2    6.67    0.71
   7  16   2    6.31    0.86
  16  -7   3   52.56    2.71
   7  16   3   56.72    2.74
   7  16  -3   54.69    1.91
   7  16  -4    4.98    0.59
  16  -7   4    3.75    0.84
   7  16   4    3.82    0.79
  16  -7   5   57.80    2.89
   7  16   5   62.11    3.22
  16  -7   6    5.03    0.94
   7  16   6    5.22    1.13
   7  16   7   43.28    2.92
  16  -7   7   39.08    2.52
  16  -7   8    1.66    0.67
   7  16   8    3.25    0.98
  16  -7   9    5.82    1.10
  16  -7  10    0.81    0.73
  -6 -16   0    3.25    0.56
  16  -6   0    3.11    0.79
   6  16   0    2.84    0.55
  16  -6  -1    1.38    0.62
  16  -6   1    1.35    0.56
  -6 -16  -1    0.75    0.36
 -16   6   1    1.61    0.53
   6  16   1    1.68    0.53
   6  16  -1    1.95    0.48
  -6 -16  -2   14.12    1.20
  16  -6  -2   14.64    1.55
  16  -6   2   13.64    1.37
 -16   6   2   13.07    1.24
   6  16  -2   14.05    0.96
   6  16   2   13.96    1.30
  16  -6   3    1.39    0.61
  -6 -16  -3    1.30    0.48
 -16   6   3    1.29    0.46
   6  16  -3    1.39    0.35
   6  16   3    0.83    0.46
   6  16  -4    2.29    0.39
  16  -6   4    1.64    0.63
   6  16   4    2.01    0.72
  16  -6   5    7.72    1.15
   6  16   5    8.70    1.29
  16  -6   6    2.43    0.72
   6  16   6    2.70    0.79
  16  -6   7    5.27    0.99
   6  16   7    5.21    1.11
  16  -6   8    7.16    1.17
  16  -6   9    6.72    1.18
  16  -6  10    3.70    1.11
  16  -6  11    0.19    0.58
  16  -5   0    0.86    0.61
  -5 -16   0    0.01    0.29
 -16   5   0    0.39    0.36
   5  16   0    0.30    0.38
  16  -5  -1    1.45    0.61
  -5 -16  -1    0.36    0.38
  16  -5   1    0.52    0.51
 -16   5   1    0.86    0.37
   5  16  -1   -0.02    0.29
   5  16   1    0.12    0.37
  16  -5  -2    0.74    0.58
  -5 -16  -2    0.78    0.40
  16  -5   2    1.63    0.61
 -16   5   2    1.10    0.44
   5  16  -2    1.22    0.31
   5  16   2    1.14    0.52
  -5 -16  -3   -0.11    0.40
  16  -5   3   -0.15    0.43
 -16   5   3    0.14    0.36
   5  16  -3   -0.24    0.23
   5  16   3    0.09    0.41
  16  -5   4    7.43    1.13
   5  16   4    5.69    0.94
   5  16  -4    5.42    0.39
  16  -5   5    1.31    0.58
   5  16   5    1.74    0.69
  16  -5   6    6.01    1.06
   5  16   6    5.78    1.06
  16  -5   7    2.59    0.78
  16  -5   8   10.54    1.37
  16  -5   9    0.88    0.59
  16  -5  10    3.35    0.94
  16  -5  11   -0.05    0.64
   4  16   0  382.82    6.60
 -16   4   0  375.19    6.71
  -4 -16   0  375.84    6.31
  16  -4   0  380.55    8.23
   4  16  -1   13.62    0.91
 -16   4  -1   14.55    0.99
 -16   4   1   15.63    1.22
   4  16   1   12.68    1.07
  -4 -16  -1   14.12    1.07
  16  -4   1   16.80    1.55
  16  -4  -1   15.65    1.54
  -4 -16  -2   19.40    1.36
 -16   4  -2   19.48    1.05
   4  16   2   20.41    1.47
 -16   4   2   17.93    1.37
   4  16  -2   19.46    0.90
  16  -4  -2   18.12    1.72
  16  -4   2   17.21    1.59
  16  -4   3   56.77    2.85
  -4 -16  -3   57.18    2.49
   4  16   3   55.60    2.57
 -16   4   3   54.26    2.56
  -4 -16  -4   75.24    3.08
  16  -4   4   76.60    3.34
   4  16   4   74.14    3.19
  16  -4   5   -0.42    0.52
  16  -4   6  112.92    4.25
  16  -4   7    5.19    1.03
  16  -4   8   20.86    1.94
  16  -4   9    1.08    0.69
  16  -4  10   23.64    2.20
  16  -4  11    0.25    0.55
 -16   3   0    0.11    0.30
  -3 -16   0   -0.36    0.27
  16  -3   0    0.88    0.56
  -3 -16  -1   42.02    1.76
 -16   3  -1   42.86    1.60
 -16   3   1   40.29    1.87
  16  -3  -1   44.20    2.52
  16  -3   1   41.33    2.41
 -16   3   2   10.04    1.03
 -16   3  -2    9.99    0.67
  16  -3  -2   11.43    1.38
  -3 -16  -2   10.42    0.99
  16  -3   2    9.61    1.20
  -3 -16  -3   16.25    1.33
  16  -3   3   18.11    1.63
 -16   3  -3   18.06    0.80
 -16   3   3   18.57    1.50
  16  -3   4   13.87    1.45
  -3 -16  -4   15.22    1.38
 -16   3  -4   15.57    0.64
  16  -3   5   75.61    3.42
  16  -3   6    0.96    0.64
  16  -3   7   21.53    1.94
  16  -3   8   -0.56    0.68
  16  -3   9   11.41    1.57
  16  -3  10   -0.04    0.61
  16  -3  11    2.80    0.99
 -16   2   0   26.29    1.32
  -2 -16   0   29.75    1.24
  16  -2   0   28.77    2.02
 -16   2  -1    2.64    0.41
  16  -2   1    2.39    0.72
  -2 -16  -1    2.77    0.47
  16  -2  -1    2.01    0.72
  16  -2  -2    6.68    1.05
  16  -2   2    6.78    1.06
  -2 -16  -2    5.58    0.71
  16  -2   3    4.27    0.87
  16  -2  -3    4.12    0.95
  -2 -16  -3    4.33    0.72
  16  -2   4   13.59    1.46
  -2 -16  -4   14.49    1.29
  16  -2   5   46.32    2.67
  16  -2   6    6.85    1.12
  16  -2   7    1.94    0.86
  16  -2   8    4.29    1.08
  16  -2   9   12.13    1.61
  16  -2  10   14.67    1.81
  16  -2  11    3.97    1.10
  16  -1   0    0.68    0.60
  -1 -16   0   -0.05    0.22
  16  -1   1    5.63    1.00
  16  -1  -1    5.31    0.98
  -1 -16  -1    5.36    0.61
  16  -1  -2    7.47    1.10
  16  -1   2    6.71    1.05
  -1 -16  -2    7.63    0.81
  16  -1  -3    0.15    0.49
  16  -1   3    0.64    0.58
  -1 -16  -3    0.33    0.41
  -1 -16  -4   -0.54    0.56
  16  -1   4   -0.22    0.60
  16  -1   5    0.29    0.62
  16  -1   6   21.13    1.89
  16  -1   7   -0.42    0.63
  16  -1   8    2.26    0.83
  16  -1   9   -0.56    0.65
  16  -1  10    0.73    0.74
  16  -1  11    0.40    0.60
  16   0   0  209.78    5.82
   0 -16   0  215.15    3.79
  16   0  -1   94.43    3.76
  16   0   1   91.28    3.70
   0 -16   1   97.15    1.63
   0 -16  -1   94.62    2.58
  16   0  -2   41.09    2.48
  16   0   2   36.52    2.33
   0 -16  -2   38.26    1.78
  16   0  -3   30.97    2.20
   0 -16  -3   32.60    1.79
  16   0   3   37.26    2.33
  16   0   4  150.63    4.91
   0 -16  -4  144.83    4.25
  16   0   5   15.72    1.62
  16   0   6  107.81    4.29
  16   0   7   -0.55    0.57
  16   0   8   31.16    2.42
  16   0   9    0.85    0.61
  16   0  10   37.70    2.83
  16   1   0    0.43    0.55
   1 -16   0   -0.21    0.23
  16   1   1   55.54    2.85
  16   1  -1   56.94    2.90
   1 -16  -1   57.47    1.93
  16   1   2    9.31    1.21
  16   1  -2   10.15    1.29
   1 -16  -2   10.14    0.92
  16   1  -3    0.77    0.64
  16   1   3    0.56    0.49
   1 -16  -3    0.79    0.35
  16   1  -4    3.82    0.99
   1 -16  -4    1.13    0.53
  16   1   4    1.88    0.59
  16   1   5   32.94    2.30
  16   1   6    4.78    0.99
  16   1   7    4.54    1.02
  16   1   8    5.78    1.20
  16   1   9    9.07    1.45
  16   1  10   -0.11    0.65
  16   2   0    3.49    0.78
   2 -16   0    3.01    0.38
  16   2  -1   -0.14    0.47
  16   2   1    0.67    0.52
   2 -16  -1    0.48    0.27
  16   2   2    6.00    1.06
  16   2  -2    5.95    1.03
   2 -16  -2    4.29    0.64
  16   2  -3    1.77    0.74
   2 -16  -3    1.59    0.50
  16   2   3    2.19    0.72
  16   2  -4   20.00    1.83
  16   2   4   21.09    1.86
   2 -16  -4   19.09    1.51
  16   2   5   22.55    1.97
  16   2   6   40.89    2.66
  16   2   7   18.44    1.88
  16   2   8    5.51    0.96
  16   2   9    7.22    1.35
  16   2  10   14.69    1.88
  16   3   0    0.67    0.59
   3 -16   0    0.13    0.20
  16   3  -1    0.60    0.48
  16   3   1    0.54    0.57
   3 -16  -1    0.78    0.33
  16   3  -2    0.37    0.52
  16   3   2   -0.26    0.50
   3 -16  -2    0.29    0.30
  16   3  -3   15.62    1.59
  16   3   3   17.81    1.66
   3 -16  -3   19.10    1.41
  16   3  -4    1.30    0.61
  16   3   4    1.73    0.72
   3 -16  -4    0.06    0.46
  16   3  -5   10.32    1.39
  16   3   5    7.53    1.14
  16   3   6    1.61    0.69
  16   3   7   -0.95    0.66
  16   3   8   -0.32    0.61
  16   3   9    2.59    0.89
  16   3  10    3.68    0.94
  16   4   0  101.34    3.94
   4 -16   0  103.61    2.46
   4 -16   1    2.92    0.26
  16   4   1    2.14    0.67
  16   4  -1    2.51    0.72
   4 -16   1    3.00    0.27
   4 -16  -1    2.62    0.46
  16   4  -2   45.14    2.62
  16   4   2   53.62    2.86
   4 -16  -2   50.29    2.12
  16   4  -3    6.23    1.10
  16   4   3    6.18    1.11
   4 -16  -3    6.71    0.88
  16   4  -4  160.19    5.26
  16   4   4  162.80    5.33
   4 -16  -4  157.10    4.63
  16   4   5    6.86    1.15
  16   4  -5    5.26    0.94
  16   4  -5    4.84    1.00
  16   4   6   60.36    3.31
  16   4  -6   63.03    3.04
  16   4   7    1.47    0.69
  16   4  -7    1.37    0.55
  16   4  -8   46.11    2.93
  16   4   8   50.98    3.27
  16   4  -9    4.30    1.05
  16   4   9    4.16    1.13
  16   4 -10   23.70    2.35
  16   5   0   -0.15    0.52
   5 -16   0    0.09    0.25
   5 -16   1    1.63    0.26
  16   5  -1    1.04    0.52
  16   5   1    1.48    0.67
   5 -16   1    1.91    0.29
   5 -16  -1    2.80    0.53
  16   5  -2    0.95    0.64
  16   5   2    0.62    0.51
   5 -16  -2    0.32    0.42
  16   5   3    4.67    0.99
  16   5  -3    2.43    0.66
  16   5  -3    4.23    0.75
   5 -16  -3    4.47    0.77
  16   5   4    5.93    1.12
  16   5  -4    4.65    0.97
  16   5  -4    4.33    0.83
   5 -16  -4    3.51    0.76
  16   5   5    9.59    1.34
  16   5  -5   11.57    1.29
  16   5  -5   10.01    1.34
  16   5   6    1.55    0.75
  16   5  -6    0.34    0.53
  16   5  -6   -0.06    0.66
  16   5   7    3.74    0.99
  16   5  -7    3.77    0.83
  16   5   8    0.55    0.62
  16   5  -8    0.91    0.74
  16   5  -9    1.45    0.86
  16   5   9    2.45    1.09
  16   5 -10    0.84    0.82
  16   6   0    7.89    1.19
   6 -16   0    7.31    0.70
  16   6   1    0.86    0.65
   6 -16   1    0.57    0.23
  16   6  -1    2.20    0.83
   6 -16  -1    1.72    0.50
   6 -16   1    1.03    0.31
  16   6   2   54.90    2.95
  16   6  -2   53.59    2.91
  16   6  -2   57.50    2.16
   6 -16  -2   55.17    2.39
  16   6   3   18.56    1.74
  16   6  -3   16.17    1.65
  16   6  -3   18.71    1.34
   6 -16  -3   17.28    1.44
  16   6   4    3.07    0.86
  16   6  -4    2.53    0.81
  16   6  -4    1.95    0.56
   6 -16  -4    3.25    0.75
  16   6   5   15.89    1.73
  16   6  -5   13.90    1.37
  16   6  -5   12.82    1.50
  16   6   6    7.42    1.19
  16   6  -6    8.36    1.19
  16   6  -6    7.37    1.22
  16   6   7    5.20    1.11
  16   6  -7    5.82    1.16
  16   6  -7    4.69    1.02
  16   6  -8   13.18    1.69
  16   6   8   13.95    1.79
  16   6  -9   10.31    1.54
  16   6   9   14.45    1.89
  16   6 -10   10.27    1.63
  16   7   0   -0.62    0.58
   7 -16   0    0.20    0.30
  16   7   1    9.23    1.29
   7 -16   1    7.35    0.59
  16   7  -1    6.83    1.05
  16   7  -1    8.70    0.77
   7 -16  -1    7.90    0.90
   7 -16   1    7.45    0.67
   7 -16   2    2.40    0.27
  16   7   2    2.52    0.91
  16   7  -2    2.02    0.74
  16   7  -2    2.97    0.57
   7 -16   2    2.45    0.30
   7 -16  -2    1.83    0.59
  16   7   3   12.75    1.51
  16   7  -3   14.10    1.53
  16   7  -3   13.13    1.17
   7 -16  -3   15.76    1.46
  16   7   4    0.12    0.55
  16   7  -4   -0.99    0.57
  16   7  -4   -0.13    0.50
  16   7   5    4.90    1.02
  16   7  -5    3.43    0.74
  16   7  -5    4.42    1.02
  16   7   6   -0.87    0.71
  16   7  -6   -0.29    0.49
  16   7  -6    0.23    0.63
  16   7   7    5.64    1.25
  16   7  -7    5.19    1.11
  16   7  -7    5.52    1.05
  16   7  -8    0.12    0.66
  16   7  -8    0.96    0.75
  16   7   8    1.04    0.66
  16   7  -9   15.18    1.85
  16   7 -10    0.14    0.60
  16   8   0  108.44    4.20
   8 -16   0  104.85    3.08
  16   8   0  109.34    2.54
  16   8   1    3.15    0.81
   8 -16   1    2.91    0.42
  16   8  -1    3.19    0.81
  16   8  -1    3.52    0.55
   8 -16   1    3.65    0.54
   8 -16  -1    2.86    0.56
  16   8   2   41.52    2.64
   8 -16   2   39.43    1.27
  16   8  -2   36.94    2.42
   8 -16  -2   38.78    2.10
  16   8  -2   38.84    1.88
  16   8   3    0.30    0.52
  16   8  -3    1.14    0.63
  16   8  -3    0.62    0.36
   8 -16  -3    0.85    0.59
  16   8   4   81.84    3.86
  16   8  -4   81.88    3.25
  16   8  -4   73.29    3.50
  16   8   5    6.67    1.31
  16   8  -5    4.12    0.93
  16   8  -5    4.96    0.98
  16   8  -6   30.44    2.30
  16   8  -6   33.72    2.33
  16   8   6   30.43    2.40
  16   8   7    0.21    0.76
  16   8  -7    0.38    0.69
  16   8  -7    0.49    0.65
  16   8  -8   13.93    1.73
  16   8  -8   16.67    1.83
  16   8   8   18.43    2.18
  16   8  -9   -0.11    0.64
  16   8  -9    0.01    0.77
  16   8 -10   30.24    2.70
  16   9   0    0.06    0.23
  16   9   0    0.55    0.57
  16   9   1    3.41    0.88
  16   9  -1    4.66    0.66
  16   9   1    3.21    0.36
   9 -16   1    4.77    0.59
  16   9  -1    2.89    0.78
  16   9   2    4.55    1.04
  16   9  -2    3.74    0.68
   9 -16   2    5.19    0.55
  16   9  -2    2.93    0.84
  16   9   3   12.03    1.47
  16   9  -3   14.21    1.32
  16   9  -3   13.83    1.51
  16   9   4    1.83    0.79
  16   9  -4    1.60    0.68
  16   9  -4    2.00    0.77
  16   9   5    3.54    0.95
  16   9  -5    5.60    1.01
  16   9  -5    4.00    0.98
  16   9   6    5.34    1.13
  16   9  -6    5.80    1.09
  16   9  -6    5.04    1.18
  16   9   7    0.62    0.61
  16   9  -7    0.09    0.57
  16   9  -7    0.85    0.60
  16   9  -8    0.00    0.64
  16   9  -8    1.98    0.99
  16   9   8   -0.45    0.87
  16   9  -9   -1.23    0.90
  16   9  -9    2.42    0.96
  16   9 -10    1.81    0.79
  16  10   0   29.92    2.27
  16  10   0   30.09    1.46
  10 -16   0   28.27    1.58
  16  10   1    1.01    0.71
  16  10  -1    1.39    0.47
  10 -16   1    0.74    0.37
  16  10  -1    0.31    0.57
  16  10   2    5.92    1.13
  16  10  -2    5.54    0.85
  16  10  -2    3.95    0.86
  10 -16   2    4.53    0.58
  16  10   3    1.34    0.71
  16  10  -3    1.14    0.52
  16  10  -3    1.55    0.68
  16  10   4   16.50    1.84
  16  10  -4   14.95    1.44
  16  10  -4   15.54    1.61
  16  10   5    2.39    0.88
  16  10  -5    2.33    0.68
  16  10  -5    2.60    0.82
  16  10   6   15.08    1.81
  16  10  -6   11.04    1.43
  16  10  -6   12.22    1.52
  16  10  -7    5.43    1.10
  16  10  -7    5.45    1.17
  16  10   7    6.22    1.38
  16  10  -8    0.83    0.66
  16  10  -8    2.99    0.87
  16  10  -9    3.91    1.13
  16  10  -9    5.14    1.16
  16  10 -10    4.72    1.01
  16  11   0    0.05    0.52
  11 -16   0   -0.25    0.45
  16  11   1   26.03    2.14
  16  11  -1   23.69    1.99
  11 -16   1   26.83    1.49
  16  11   2    1.91    0.79
  16  11  -2   -0.23    0.54
  16  11   3   10.33    1.43
  16  11  -3    8.45    1.20
  16  11   4   -0.60    0.66
  16  11  -4   -0.52    0.45
  16  11  -4    0.71    0.54
  16  11   5    7.74    1.38
  16  11  -5    7.99    1.14
  16  11  -5    8.19    1.23
  16  11   6    3.29    1.06
  16  11  -6    5.75    1.09
  16  11  -6    3.83    1.02
  16  11  -7    6.51    1.16
  16  11  -7    5.44    1.08
  16  11   7    8.28    1.47
  16  11  -8    1.00    0.93
  16  11  -8    0.16    0.59
  16  11  -9    3.05    1.33
  16  11  -9    4.82    1.04
  12 -16   0   29.69    1.77
  16  12   0   28.32    2.21
  12 -16   1    0.59    0.41
  16  12  -1    1.28    0.61
  16  12   1    0.94    0.70
  16  12  -2   57.47    3.07
  16  12   2   55.62    3.16
  16  12  -3    0.80    0.51
  16  12   3    1.23    0.74
  16  12  -4   29.77    2.22
  16  12   4   25.35    2.25
  16  12  -5    0.69    0.64
  16  12   5   -1.04    1.04
  16  12  -6   12.13    1.46
  16  12  -6   11.55    1.51
  16  12   6   13.00    1.74
  16  12  -7    0.55    0.69
  16  12  -7    0.29    0.64
  16  12  -8    7.73    1.44
  16  12  -8    9.58    1.31
  16  12  -9    1.65    0.80
  13 -16   0   -0.38    0.39
  16  13   0    0.31    0.59
  13 -16   1    5.17    0.78
  13 -16  -1    4.75    0.90
  16  13   1    7.16    1.22
  16  13  -1    4.72    1.02
  16  13   2    6.43    1.27
  16  13  -2    7.00    1.15
  16  13  -3    0.28    0.54
  16  13   3    0.98    0.76
  16  13  -4    6.60    1.17
  16  13   4    7.88    1.42
  16  13  -5    8.17    1.24
  16  13   5    6.75    1.33
  16  13  -6    0.60    0.56
  16  13   6    1.18    0.81
  16  13  -7    2.38    0.94
  16  13  -7    1.70    0.73
  16  13  -8   -0.11    0.70
  14 -16   0   16.10    1.41
  16  14   0   15.53    1.71
  14 -16  -1    1.61    0.56
  16  14  -1    0.71    0.58
  16  14   1    4.77    1.07
  16  14  -2    1.16    0.65
  16  14   2    2.18    0.80
  16  14   3    1.72    0.74
  16  14  -3    1.02    0.59
  16  14  -4    6.55    1.11
  16  14   4    8.08    1.37
  16  14  -5    3.37    0.84
  16  14   5    3.51    0.96
  16  14  -6    2.69    0.75
  16  14  -7    0.86    0.76
  16  14  -8    2.26    1.16
  15 -16   0    1.11    0.56
  16  15   0   -0.01    0.58
  15 -16  -1   13.69    1.46
  16  15  -1   15.58    1.73
  16  15   1   17.95    1.89
  16  15  -2    0.58    0.51
  16  15   2   -0.15    0.79
  16  15   3   10.10    1.52
  16  15  -3   14.09    1.60
  16  15   4    1.36    0.86
  16  15  -4    1.12    0.71
  16  15  -5    7.77    1.23
  16  15   5    9.75    1.65
  16  16   0   14.16    1.71
  16 -16  -1   -0.36    0.54
  16  16  -1    0.38    0.74
  16  16   1    0.79    0.75
  16 -16  -2   12.70    1.55
  16  16   2   13.48    1.67
  16  16  -2   13.96    1.60
  16  16  -3    0.16    0.70
  16  16   3    0.20    0.57
  16  16   4    4.81    1.19
  16  17   0    1.91    0.80
  16  17  -1    5.87    1.20
  16  17   1    5.58    1.08
  17 -16  -2   -0.47    0.56
  16  17  -2   -0.33    0.60
  16  17   2    0.59    0.70
  16  17   3    4.92    1.27
  16  17   4    4.57    1.14
  17 -15   0    1.65    0.71
  15  17   0    0.61    0.56
  17 -15  -1    0.72    0.71
  15  17   1    0.11    0.56
  15  17  -1    0.21    0.57
  17 -15  -2    0.99    0.70
  15  17  -2    0.04    0.49
  15  17   2    1.29    0.78
  15  17   3   -1.01    0.67
  15  17   4    2.10    1.10
  15  17   5    1.32    0.94
  17 -14   0   -0.12    0.48
  14  17   0    0.51    0.59
  17 -14  -1   40.55    2.60
  17 -14   1   40.18    2.45
  14  17  -1   37.18    2.45
  14  17   1   39.27    2.61
  17 -14  -2    4.84    1.01
  17 -14   2    4.79    0.90
  14  17  -2    6.46    1.09
  14  17   2    6.56    1.20
  14  17   3    7.80    1.40
  14  17   4    0.45    0.63
  14  17   5   14.82    1.86
  14  17   6    2.81    1.10
  17 -13   0   61.49    3.11
  13  17   0   57.32    2.91
  17 -13  -1   -0.15    0.48
  17 -13   1    0.28    0.55
  13  17   1   -0.03    0.57
  13  17  -1   -0.43    0.53
  17 -13  -2   62.21    3.39
  13  17  -2   75.02    3.25
  17 -13   2   72.81    3.27
  13  17   2   69.02    3.49
  17 -13   3    1.68    0.66
  13  17  -3    1.25    0.63
  13  17   3   -0.56    0.81
  13  17   4   54.81    3.27
  13  17   5    1.39    0.76
  13  17   6   23.58    2.33
  17 -12   0   -0.29    0.47
  12  17   0   -0.10    0.49
  17 -12  -1    6.48    1.12
  17 -12   1    6.27    1.07
  12  17   1    7.25    1.16
  12  17  -1    4.43    0.80
  17 -12   2    5.81    1.01
  17 -12  -2    5.18    1.05
  12  17  -2    6.57    0.98
  12  17   2    6.38    1.11
  17 -12   3    2.53    0.67
  12  17  -3    2.24    0.68
  12  17   3    0.55    0.55
  17 -12   4    0.81    0.56
  12  17   4    0.82    0.67
  17 -12   5    2.28    0.70
  12  17   5    0.62    0.59
  12  17   6   -0.20    0.62
  12  17   7    1.61    0.75
  17 -11   0    3.84    0.90
  11  17   0    4.13    0.84
  17 -11  -1    1.37    0.67
  17 -11   1    2.02    0.72
  11  17  -1    1.54    0.56
  11  17   1    2.06    0.70
  17 -11  -2    5.82    1.16
  17 -11   2    4.66    0.92
  11  17  -2    5.79    0.91
  11  17   2    4.90    0.83
  17 -11   3    4.32    0.86
  11  17  -3    2.20    0.58
  11  17   3    2.33    0.85
  17 -11   4    2.79    0.74
  11  17   4    1.10    0.55
  17 -11   5    0.34    0.54
  11  17   5    0.84    0.65
  17 -11   6    1.03    0.48
  11  17   6    1.73    0.85
  11  17   7    3.47    1.08
  17 -10   0    0.65    0.58
  10  17   0   -0.14    0.41
  17 -10  -1   23.76    1.99
  17 -10   1   23.32    1.93
  10  17   1   26.65    1.89
  10  17  -1   25.71    1.74
  17 -10  -2   -0.29    0.57
  17 -10   2    0.39    0.61
  10  17  -2    1.16    0.50
  10  17   2   -0.50    0.49
  17 -10   3   85.99    3.62
  10  17   3   86.64    3.74
  10  17  -3   93.11    3.10
  17 -10   4    8.56    1.14
  10  17   4   10.95    1.40
  17 -10   5   35.14    2.29
  10  17   5   39.52    2.72
  17 -10   6   -0.61    0.48
  10  17   6   -0.42    0.70
  17 -10   7   13.87    1.49
  10  17   7   16.19    2.00
  10  17   8    1.02    0.95
  17  -9   0   70.07    3.30
   9  17   0   73.45    2.96
  17  -9  -1    0.82    0.57
  17  -9   1    0.97    0.59
   9  17  -1    0.58    0.40
   9  17   1    1.13    0.58
  17  -9  -2   89.27    3.91
  17  -9   2   87.89    3.66
   9  17  -2   95.49    3.08
   9  17   2   90.95    3.58
  17  -9   3    1.71    0.72
   9  17  -3    0.67    0.32
   9  17   3    1.60    0.68
  17  -9   4   85.27    3.57
   9  17   4   84.36    3.78
  17  -9   5    3.42    0.76
   9  17   5    2.59    0.88
  17  -9   6   28.44    2.12
   9  17   6   28.48    2.38
  17  -9   7    1.82    0.80
   9  17   7    1.38    0.81
  17  -9   8   15.43    1.60
   9  17   8   17.32    2.03
  17  -8   0   -0.06    0.56
   8  17   0    0.51    0.45
  17  -8  -1    2.94    0.77
  17  -8   1    1.84    0.61
  -8 -17  -1    2.69    0.65
 -17   8   1    3.19    0.75
   8  17  -1    3.00    0.61
   8  17   1    1.92    0.64
  17  -8  -2    2.74    0.79
  17  -8   2    0.35    0.61
   8  17  -2    0.23    0.31
   8  17   2    1.82    0.59
  17  -8   3    0.92    0.52
   8  17  -3    0.42    0.28
   8  17   3    1.03    0.59
  17  -8   4    0.37    0.54
   8  17   4    0.46    0.58
  17  -8   5   -0.78    0.53
   8  17   5   -0.33    0.54
  17  -8   6   15.40    1.72
   8  17   6   18.06    1.95
  17  -8   7    1.59    0.68
   8  17   7    0.70    0.73
  17  -8   8    6.38    1.26
   8  17   8    5.58    1.14
  17  -8   9    0.82    0.62
  17  -7   0    1.51    0.62
  -7 -17   0    1.86    0.53
   7  17   0    1.52    0.43
  17  -7  -1    1.55    0.78
  17  -7   1    1.43    0.59
  -7 -17  -1    1.23    0.47
 -17   7   1    2.22    0.61
   7  17  -1    1.66    0.52
   7  17   1    2.48    0.67
  17  -7  -2    1.64    0.75
  -7 -17  -2    2.23    0.63
  17  -7   2    1.25    0.58
   7  17   2    0.99    0.55
   7  17  -2    0.85    0.36
  17  -7   3    3.09    0.83
   7  17  -3    2.08    0.41
   7  17   3    2.56    0.73
  17  -7   4    0.02    0.53
   7  17   4   -0.51    0.55
  17  -7   5    3.34    0.82
   7  17   5    2.78    0.81
  17  -7   6   -0.40    0.60
   7  17   6   -0.11    0.55
  17  -7   7    9.26    1.34
   7  17   7    8.74    1.39
  17  -7   8    2.03    0.73
  17  -7   9    4.53    1.07
  17  -7  10   -0.36    0.64
  17  -6   0    0.22    0.49
  -6 -17   0   -0.08    0.29
 -17   6   0    0.28    0.38
   6  17   0    0.61    0.44
  17  -6  -1  153.51    5.09
  17  -6   1  158.05    5.07
  -6 -17  -1  151.21    4.02
 -17   6   1  151.78    4.29
   6  17   1  158.58    4.29
   6  17  -1  158.51    3.74
  -6 -17  -2    4.99    0.77
  17  -6  -2    6.42    1.09
  17  -6   2    5.79    1.01
 -17   6   2    4.75    0.77
   6  17  -2    6.06    0.62
   6  17   2    5.03    0.89
  17  -6   3   82.43    3.56
   6  17   3   94.09    3.73
   6  17  -3   83.87    2.17
  17  -6   4   -1.04    0.58
   6  17   4   -0.43    0.55
  17  -6   5   45.29    2.65
   6  17   5   46.26    2.74
  17  -6   6    4.13    0.93
   6  17   6    3.64    0.94
  17  -6   7   67.33    3.45
  17  -6   8   -0.25    0.56
  17  -6   9   21.28    2.02
  17  -6  10    1.01    0.81
  -5 -17   0  141.20    3.49
  17  -5   0  142.23    4.80
 -17   5   0  137.73    3.75
   5  17   0  160.36    4.08
  17  -5   1   -0.25    0.51
  -5 -17  -1    0.67    0.46
  17  -5  -1   -0.28    0.51
 -17   5  -1    0.44    0.41
 -17   5   1    0.07    0.32
   5  17   1    0.32    0.38
   5  17  -1    0.18    0.32
  17  -5   2   74.06    3.37
  -5 -17  -2   76.98    2.84
  17  -5  -2   79.49    3.65
   5  17   2   74.20    2.93
 -17   5  -2   74.51    2.34
   5  17  -2   80.53    2.15
 -17   5   2   73.06    2.92
  17  -5   3    1.55    0.63
  -5 -17  -3    0.33    0.41
 -17   5   3    0.72    0.48
   5  17   3    0.59    0.40
   5  17  -3    1.20    0.29
  17  -5   4  105.04    4.08
   5  17   4  106.46    3.97
  17  -5   5    0.08    0.55
   5  17   5   -0.37    0.76
  17  -5   6   50.27    2.88
  17  -5   7   -0.20    0.54
  17  -5   8   12.83    1.58
  17  -5   9    0.54    0.65
  17  -5  10    9.93    1.48
  17  -5  11    2.32    1.07
  -4 -17   0    0.19    0.32
  17  -4   0    0.89    0.65
 -17   4   0    0.22    0.34
   4  17   0    0.48    0.32
  17  -4   1   14.96    1.56
  -4 -17  -1   17.54    1.19
  17  -4  -1   15.84    1.60
   4  17   1   18.46    1.31
 -17   4  -1   17.75    1.09
 -17   4   1   18.01    1.33
  -4 -17  -2    0.43    0.35
  17  -4  -2    0.79    0.52
  17  -4   2    0.78    0.54
 -17   4   2    1.64    0.58
 -17   4  -2    1.24    0.35
   4  17   2    1.06    0.49
  -4 -17  -3   35.98    2.00
  17  -4   3   34.26    2.32
 -17   4   3   33.31    2.03
  17  -4  -3   31.49    2.36
  17  -4   4    7.94    1.22
  17  -4   5   -0.31    0.57
  17  -4   6    2.51    0.85
  17  -4   7    9.22    1.37
  17  -4   8    4.93    1.06
  17  -4   9    0.91    0.67
  17  -4  10    4.42    1.05
  17  -4  11   -0.45    0.68
 -17   3   0    5.76    0.67
  -3 -17   0    6.22    0.63
  17  -3   0    3.97    0.85
 -17   3  -1    1.19    0.37
 -17   3   1    0.76    0.36
  17  -3   1    0.44    0.49
  17  -3  -1    1.06    0.57
  -3 -17  -1    1.09    0.37
 -17   3  -2   10.07    0.68
 -17   3   2    9.88    1.03
  -3 -17  -2   11.45    1.05
  17  -3  -2   10.20    1.35
  17  -3   2   10.08    1.28
  17  -3  -3    2.00    0.81
  17  -3   3    1.81    0.66
  -3 -17  -3    2.44    0.62
  17  -3   4    5.77    1.03
  17  -3   5   10.59    1.41
  17  -3   6    3.09    0.89
  17  -3   7    9.09    1.32
  17  -3   8    2.13    0.86
  17  -3   9    3.41    1.03
  17  -3  10    1.94    0.90
  -2 -17   0   -0.20    0.25
  17  -2   0    0.67    0.54
  17  -2  -1  195.18    5.81
  17  -2   1  197.72    5.75
  -2 -17  -1  196.76    4.21
  17  -2  -2    2.63    0.79
  17  -2   2    3.78    0.86
  -2 -17  -2    3.44    0.60
  17  -2  -3  126.50    4.68
  -2 -17  -3  117.23    3.63
  17  -2   3  118.48    4.40
  17  -2   4   35.65    2.38
  -2 -17  -4   34.62    2.07
  17  -2   5  158.74    5.30
  17  -2   6    0.12    0.59
  17  -2   7   51.44    3.04
  17  -2   8    2.67    0.91
  17  -2   9   40.45    2.91
  17  -2  10   -0.90    0.63
  -1 -17   0   40.40    1.41
  17  -1   0   38.83    2.46
  17  -1   1    0.07    0.48
  17  -1  -1   -0.33    0.55
  -1 -17  -1   -0.36    0.35
  17  -1  -2   84.30    3.72
  -1 -17  -2   82.76    2.75
  17  -1   2   86.31    3.72
  17  -1  -3    0.82    0.54
  17  -1   3    3.57    0.91
  -1 -17  -3    0.90    0.36
  17  -1   4   83.05    3.67
  -1 -17  -4   87.13    3.27
  17  -1   5    0.51    0.67
  17  -1   6   31.99    2.36
  17  -1   7    0.31    0.60
  17  -1   8   14.80    1.71
  17  -1   9    0.33    0.60
  17  -1  10   13.06    1.77
  17   0   0    0.33    0.54
   0 -17   0    0.58    0.25
  17   0   1   15.97    1.62
  17   0  -1   18.50    1.73
   0 -17  -1   16.46    1.03
  17   0  -2   23.61    1.98
  17   0   2   28.23    2.11
   0 -17  -2   25.63    1.46
  17   0   3    8.45    1.26
  17   0  -3   10.24    1.40
   0 -17  -3   10.69    1.06
  17   0  -4   76.57    3.70
   0 -17  -4   79.63    3.11
  17   0   4   78.30    3.59
  17   0   5    3.02    0.82
  17   0   6   13.16    1.60
  17   0   7   16.18    1.82
  17   0   8   16.62    1.81
  17   0   9    1.04    0.82
  17   0  10    3.64    1.11
  17   1   0    0.79    0.62
   1 -17   0    1.47    0.31
  17   1  -1    0.82    0.58
  17   1   1    0.53    0.55
   1 -17  -1    0.27    0.30
  17   1   2    9.42    1.29
  17   1  -2    8.95    1.30
   1 -17  -2    9.42    0.92
  17   1  -3    1.16    0.66
   1 -17  -3    1.40    0.45
  17   1   3    3.25    0.83
  17   1  -4   47.35    2.90
  17   1   4   45.95    2.79
   1 -17  -4   44.03    2.23
  17   1   5   25.86    2.15
  17   1   6   19.44    1.90
  17   1   7    3.48    0.98
  17   1   8    2.68    1.05
  17   1   9    3.19    1.16
  17   2   0    0.75    0.61
   2 -17   0    0.06    0.18
  17   2  -1  187.87    5.68
   2 -17  -1  190.61    3.96
  17   2   1  193.45    5.79
  17   2  -2    4.81    1.02
  17   2   2    4.91    0.97
   2 -17  -2    5.49    0.69
  17   2  -3   53.69    2.99
  17   2   3   54.82    3.00
   2 -17  -3   50.56    2.29
  17   2  -4    1.15    0.78
   2 -17  -4    1.36    0.53
  17   2   4    1.44    0.71
  17   2  -5  259.53    7.27
  17   2   5  256.96    7.13
  17   2   6    0.35    0.56
  17   2   7  103.77    4.53
  17   2   8    1.05    0.85
  17   2   9   44.81    3.14
  17   3   0   37.31    2.41
   3 -17   0   33.25    1.21
  17   3  -1    0.53    0.52
  17   3   1    0.81    0.70
   3 -17  -1   -0.06    0.27
  17   3  -2   37.79    2.45
  17   3   2   39.78    2.54
   3 -17  -2   37.55    1.81
  17   3  -3    0.67    0.60
  17   3   3    2.16    0.86
   3 -17  -3    1.89    0.55
  17   3  -4   22.57    2.01
  17   3   4   21.90    1.96
   3 -17  -4   21.27    1.65
  17   3  -5   12.78    1.59
  17   3   5   13.28    1.56
  17   3   6   28.58    2.34
  17   3   7    6.19    1.18
  17   3   8   17.87    2.00
  17   3   9    1.57    0.90
  17   4   0    0.93    0.66
   4 -17   0   -0.28    0.24
  17   4  -1    7.94    1.20
  17   4   1    5.59    1.06
   4 -17  -1    5.60    0.65
  17   4   2    1.52    0.62
  17   4  -2    2.79    0.79
   4 -17  -2    1.22    0.47
  17   4  -3    6.36    1.13
  17   4   3    5.41    1.68
   4 -17  -3    5.31    0.80
  17   4  -4   45.82    2.82
  17   4   4   50.91    2.96
   4 -17  -4   44.03    2.39
  17   4  -5    4.11    1.06
  17   4   5    3.16    0.88
  17   4  -6   26.59    2.26
  17   4   6   23.48    2.15
  17   4   7    7.18    1.23
  17   4   8    7.90    1.39
  17   4   9    5.62    1.29
  17   5   0   72.02    3.47
   5 -17   0   72.95    2.07
   5 -17   1    0.52    0.19
  17   5  -1    1.56    0.76
  17   5   1    1.51    0.74
   5 -17   1    0.84    0.20
   5 -17  -1    0.79    0.36
  17   5  -2   26.69    2.08
  17   5   2   28.78    2.19
   5 -17  -2   24.96    1.54
  17   5  -3    0.34    0.55
  17   5   3    0.06    0.57
   5 -17  -3   -0.05    0.39
  17   5   4   42.34    2.75
  17   5  -4   41.37    2.72
  17   5  -4   40.87    2.18
   5 -17  -4   36.81    2.22
  17   5   5    1.39    0.74
  17   5  -5    2.59    0.71
  17   5  -5    2.50    0.82
  17   5   6   11.83    1.57
  17   5  -6    9.93    1.27
  17   5  -6   14.00    1.71
  17   5   7    0.50    0.57
  17   5  -7   -0.87    0.79
  17   5  -7    0.16    0.60
  17   5   8   15.35    1.93
  17   5  -8   10.98    1.55
  17   5  -9    3.19    1.07
  17   5 -10    2.37    0.85
  17   6   0   -0.52    0.58
  17   6  -1  190.92    5.87
   6 -17   1  196.59    3.25
  17   6   1  193.87    5.95
   6 -17  -1  196.99    4.42
  17   6  -2   -0.64    0.70
  17   6   2    0.22    0.52
   6 -17  -2    1.13    0.54
  17   6   3   98.20    4.17
  17   6  -3   94.20    4.01
  17   6  -3   94.22    3.12
   6 -17  -3   88.41    3.30
  17   6   4   23.65    2.07
  17   6  -4   27.07    1.83
  17   6  -4   22.95    2.02
  17   6   5  109.75    4.62
  17   6  -5  109.15    3.96
  17   6  -5  106.20    4.40
  17   6   6    0.44    0.68
  17   6  -6    0.22    0.55
  17   6  -6    0.58    0.54
  17   6  -7   70.65    3.71
  17   6  -7   73.84    3.64
  17   6   7   74.18    4.00
  17   6   8    2.02    0.95
  17   6  -8    1.28    0.77
  17   6  -8    0.49    0.76
  17   6  -9   39.24    2.90
  17   6 -10    3.73    1.13
  17   7   0   46.05    2.79
   7 -17   1    2.64    0.35
  17   7  -1    2.74    0.79
  17   7   1    2.03    0.68
  17   7   2    8.87    1.30
  17   7  -2    7.43    1.14
  17   7  -2    8.53    0.84
   7 -17  -2    7.57    0.96
  17   7   3    1.69    0.80
  17   7  -3    1.85    0.73
  17   7  -3    0.44    0.37
   7 -17  -3    0.49    0.48
  17   7   4   34.46    2.53
  17   7  -4   32.82    2.00
  17   7  -4   34.93    2.49
  17   7   5    1.65    0.87
  17   7  -5   -0.50    0.57
  17   7  -5    0.59    0.69
  17   7   6    6.80    1.38
  17   7  -6    5.78    1.06
  17   7  -6    3.98    1.02
  17   7   7    2.66    0.92
  17   7  -7    0.41    0.60
  17   7  -7    0.87    0.64
  17   7  -8    0.06    0.58
  17   7  -8   -0.25    0.59
  17   7   8    0.77    0.88
  17   7  -9    4.28    1.23
  17   7  -9    1.30    0.65
  17   7 -10    6.69    1.47
  17   8   0   -0.02    0.57
  17   8   1    1.99    0.66
  17   8  -1    3.16    0.53
  17   8  -1    2.94    0.86
   8 -17   1    3.70    0.47
  17   8   2   14.93    1.67
  17   8  -2   15.19    1.18
  17   8  -2   13.35    1.55
  17   8   3   11.79    1.50
  17   8  -3   14.50    1.24
  17   8  -3   14.61    1.62
  17   8   4    2.18    0.86
  17   8  -4    0.62    0.50
  17   8  -4    0.42    0.54
  17   8   5    7.86    1.39
  17   8  -5    5.41    0.91
  17   8  -5    6.14    1.19
  17   8   6   12.49    1.64
  17   8  -6   12.03    1.50
  17   8  -6   11.95    1.52
  17   8   7    4.17    1.17
  17   8  -7    3.51    0.90
  17   8  -7    1.47    0.68
  17   8  -8    8.62    1.39
  17   8  -8    7.10    1.28
  17   8  -9    1.99    0.84
  17   8  -9    1.82    0.88
  17   8 -10    7.18    1.45
  17   9   0   58.01    3.17
   9 -17   0   56.81    2.15
  17   9   1    8.02    1.22
  17   9  -1    7.69    0.83
  17   9  -1    8.39    1.29
  17   9   2   38.47    2.65
  17   9  -2   39.64    2.61
  17   9  -2   37.93    1.90
  17   9   3    0.59    0.73
  17   9  -3    0.02    0.36
  17   9  -3   -0.52    0.63
  17   9   4   35.25    2.66
  17   9  -4   38.14    2.23
  17   9  -4   36.01    2.52
  17   9   5    3.16    0.94
  17   9  -5    2.96    0.80
  17   9  -5    2.52    0.89
  17   9   6   13.78    1.83
  17   9  -6   15.43    1.67
  17   9  -6   15.17    1.79
  17   9   7    1.14    0.69
  17   9  -7    1.98    0.78
  17   9  -7    1.53    0.83
  17   9  -8   31.39    2.55
  17   9  -8   28.50    2.41
  17   9  -9    2.64    0.96
  17   9  -9   -0.21    0.75
  17   9 -10    8.56    1.55
  17  10   0   -0.35    0.63
  10 -17   0    0.41    0.44
  17  10   1  102.52    4.35
  17  10  -1   99.53    4.20
  17  10  -1  101.17    3.02
  17  10   2    0.15    0.56
  17  10  -2    0.66    0.48
  17  10  -2    0.65    0.62
  17  10  -3   72.42    3.57
  17  10   3   75.87    3.83
  17  10  -3   72.96    3.03
  17  10   4    4.11    0.99
  17  10  -4    3.34    1.00
  17  10  -4    2.98    0.75
  17  10  -5   48.38    2.96
  17  10  -5   54.00    2.93
  17  10   5   49.32    3.20
  17  10   6   -0.31    0.63
  17  10  -6    1.48    0.89
  17  10  -6   -1.14    0.72
  17  10  -7   59.44    3.42
  17  10  -7   56.68    3.27
  17  10  -8    2.33    0.96
  17  10  -8    1.53    0.83
  17  10  -9   26.00    2.45
  17  10  -9   28.25    2.41
  17  11   0    4.91    1.11
  11 -17   0    5.09    0.77
  17  11   1    2.82    0.95
  17  11  -1    1.09    0.61
  17  11   2    3.30    0.88
  17  11  -2    4.41    0.72
  17  11  -2    4.24    0.94
  17  11   3    3.32    1.07
  17  11  -3    3.27    0.81
  17  11  -3    2.13    0.84
  17  11   4    1.79    0.81
  17  11  -4    3.45    0.78
  17  11  -4    2.56    0.89
  17  11   5    9.15    1.44
  17  11  -5   11.27    1.45
  17  11  -5   12.50    1.54
  17  11   6    3.58    1.11
  17  11  -6    1.42    0.79
  17  11  -6    1.41    0.74
  17  11  -7    1.16    0.72
  17  11  -7    2.03    0.85
  17  11  -8   -0.72    0.64
  17  11  -8    1.27    0.78
  17  11  -9    2.61    0.96
  17  11  -9    1.73    0.81
  17  12   0    0.08    0.56
  17  12  -1    0.95    0.58
  17  12   1    0.89    1.23
  17  12   2    1.35    0.87
  17  12  -2    0.64    0.65
  17  12   3   -0.27    0.64
  17  12  -3    1.65    0.64
  17  12  -3   -0.13    0.63
  17  12   4   10.34    1.53
  17  12  -4   10.73    1.36
  17  12  -4    9.86    1.42
  17  12   5    0.83    0.81
  17  12  -5   -0.79    0.63
  17  12  -5    0.10    0.60
  17  12   6    1.96    0.90
  17  12  -6    2.29    0.82
  17  12  -6    3.61    0.98
  17  12  -7    1.16    0.87
  17  12  -7    1.05    0.66
  17  12  -8   12.57    1.84
  17  12  -8   10.13    1.48
  17  13   0   23.79    2.12
  17  13   1    1.62    0.82
  17  13  -1    1.31    0.71
  13 -17  -1    1.52    0.58
  17  13   2   31.52    2.54
  17  13  -2   33.81    2.48
  17  13   3   -0.63    0.76
  17  13  -3   -0.64    0.67
  17  13   4   21.70    2.09
  17  13  -4   22.57    2.09
  17  13   5    1.41    0.98
  17  13  -5   -0.02    0.60
  17  13  -5    0.73    0.55
  17  13  -6   38.03    2.76
  17  13  -6   32.82    2.43
  17  13  -7    0.28    0.60
  17  13  -7    1.17    0.72
  17  13  -8   15.70    1.98
  17  14   0   -0.75    0.67
  17  14  -1   47.93    2.98
  17  14   1   46.13    3.01
  17  14  -2    0.87    0.64
  17  14   2    2.02    0.98
  17  14  -3   36.32    2.58
  17  14   3   39.76    2.87
  17  14   4    3.42    0.99
  17  14  -4    3.29    1.05
  17  14  -5   26.65    2.25
  17  14  -6    0.06    0.63
  17  14  -6    1.55    0.75
  17  14  -7   29.56    2.60
  17  15   0    0.41    0.74
  17  15   1   -0.35    0.69
  17  15  -1    0.14    0.65
  15 -17  -2    2.79    0.74
  17  15  -2    3.32    0.92
  17  15   2    3.60    1.08
  17  15   3    0.51    0.71
  17  15  -3   -0.04    0.56
  17  15   4   -1.41    0.85
  17  15  -4    0.17    0.66
  17  16   0   -0.67    0.78
  17  16  -1    0.94    0.68
  17  16   1    0.38    0.60
  17  16   2    1.43    1.00
  17  16  -2    1.71    0.77
  17  16  -3   -0.22    0.57
  17  16   3    1.43    0.79
  17  17   0   33.86    2.60
  17  17  -1   -0.17    0.56
  17  17   1   -0.20    0.61
  17  17   2   24.82    2.28
  17  17   3   -0.95    0.83
  17  18   1   28.06    2.44
  17  18   2    0.34    0.75
  16  18   0   -0.14    0.53
  16  18   1    1.25    0.67
  16  18   2    3.73    1.06
  18 -16  -3    5.00    1.16
  16  18   3    4.21    1.11
  18 -15   0   -0.26    0.64
  15  18   0   -0.02    0.60
  18 -15  -1    4.26    1.04
  15  18   1    2.69    0.86
  18 -15  -2   -0.25    0.67
  15  18   2   -0.49    0.82
  18 -15  -3    0.12    0.66
  15  18   3   -0.56    0.60
  15  18   4    3.08    0.89
  18 -14   0    9.48    1.34
  14  18   0    9.25    1.27
  18 -14   1    0.35    0.59
  18 -14  -1    0.65    0.68
  14  18   1    0.58    0.63
  14  18  -1    0.55    0.57
  18 -14  -2    6.18    1.20
  14  18   2    9.11    1.39
  18 -14  -3    1.37    0.75
  14  18   3    2.49    0.91
  14  18   4    8.04    1.40
  14  18   5   -0.03    0.72
  18 -13   0    0.48    0.74
  13  18   0   -0.74    0.66
  18 -13  -1   33.82    2.46
  18 -13   1   29.93    2.25
  13  18   1   32.24    2.35
  13  18  -1   29.47    2.05
  18 -13  -2    1.32    0.84
  18 -13   2    0.48    0.52
  13  18   2    0.57    0.56
  18 -13  -3   37.60    2.85
  18 -13   3   46.45    2.70
  13  18   3   42.80    2.89
  13  18   4    1.13    0.67
  13  18   5   14.02    1.84
  13  18   6    0.98    0.78
  18 -12   0   -0.17    0.52
  12  18   0   -0.91    0.58
  18 -12   1   -0.14    0.51
  18 -12  -1    0.09    0.65
  12  18  -1   -0.73    0.50
  12  18   1   -0.19    0.48
  18 -12   2    0.92    0.57
  18 -12  -2    0.18    0.56
  12  18   2    2.72    0.79
  18 -12  -3    2.60    0.88
  18 -12   3    3.14    0.84
  12  18   3    3.25    0.88
  18 -12   4    2.97    0.73
  12  18   4    2.63    0.94
  12  18   5   -0.50    0.71
  12  18   6   -0.29    0.69
  18 -11   0    0.00    0.52
  11  18   0    0.01    0.43
  18 -11   1    0.64    0.68
  18 -11  -1    0.81    0.56
  11  18  -1    0.96    0.54
  11  18   1    0.67    0.44
  18 -11   2    0.84    0.60
  18 -11  -2    1.13    0.72
  11  18   2    1.57    0.62
  18 -11  -3   12.67    1.62
  18 -11   3   10.95    1.38
  11  18   3   11.51    1.46
  18 -11   4    0.18    0.55
  11  18   4    1.36    0.63
  18 -11   5    5.00    1.00
  11  18   5    3.50    1.09
  11  18   6    0.65    0.71
  11  18   7    0.91    0.79
  18 -10   0   13.28    1.56
  10  18   0   14.49    1.36
  18 -10   1    1.03    0.53
  18 -10  -1    2.36    0.79
  10  18   1    2.71    0.79
  10  18  -1    2.62    0.68
  18 -10  -2   30.07    2.37
  18 -10   2   32.10    2.28
  10  18   2   31.86    2.17
  18 -10   3    2.36    1.01
  18 -10  -3    2.66    0.97
  10  18   3    2.59    1.01
  18 -10   4   22.01    1.90
  10  18   4   26.61    2.24
  18 -10   5   -0.27    0.53
  10  18   5    0.80    0.66
  18 -10   6    4.87    0.94
  10  18   6    4.72    1.11
  18 -10   7    3.93    0.92
  10  18   7    3.43    1.08
  18  -9   0   -0.30    0.54
   9  18   0    0.00    0.38
  18  -9  -1   76.67    3.68
  18  -9   1   75.70    3.54
   9  18  -1   78.64    2.92
   9  18   1   82.10    3.27
  18  -9   2    1.56    0.67
  18  -9  -2    0.74    0.74
   9  18   2    1.72    0.70
  18  -9  -3   39.51    2.80
  18  -9   3   39.33    2.53
   9  18   3   34.14    2.32
  18  -9   4    0.04    0.50
   9  18   4    0.46    0.59
  18  -9   5   14.09    1.57
   9  18   5   15.18    1.72
  18  -9   6   -0.31    0.52
   9  18   6   -0.46    0.88
  18  -9   7    6.30    1.10
   9  18   7    9.55    1.63
  18  -9   8    0.25    0.63
   9  18   8   -0.44    0.71
  18  -8   0   -0.93    0.66
   8  18   0   -0.76    0.50
  18  -8   1    0.54    0.62
  18  -8  -1    0.12    0.52
   8  18   1    0.78    0.43
   8  18  -1    0.29    0.44
  18  -8  -2    1.11    0.86
  18  -8   2    0.36    0.50
   8  18   2    0.48    0.56
  18  -8   3    0.70    0.51
  18  -8  -3   -1.09    0.81
   8  18   3    0.68    0.52
  18  -8   4   17.02    1.68
   8  18   4   18.39    1.79
  18  -8   5   -0.26    0.54
   8  18   5    1.25    0.68
  18  -8   6   -0.29    0.53
   8  18   6   -0.89    0.72
  18  -8   7    1.00    0.70
   8  18   7    0.77    0.59
  18  -8   8    1.04    0.67
   8  18   8    1.05    0.79
  18  -8   9    2.79    0.91
  18  -7   0    0.11    0.62
   7  18   0    0.06    0.33
  18  -7   1    4.26    0.89
  18  -7  -1    5.79    1.08
   7  18   1    8.93    1.09
   7  18  -1    6.37    0.79
  18  -7  -2    0.98    0.57
  18  -7   2    2.49    0.81
   7  18   2    2.01    0.65
  18  -7  -3    0.13    0.60
  18  -7   3   -0.78    0.59
   7  18   3    1.73    0.72
  18  -7   4    1.34    0.74
   7  18   4    0.22    0.47
  18  -7   5    8.86    1.27
   7  18   5    8.48    1.28
  18  -7   6    0.74    0.60
   7  18   6    0.90    0.75
  18  -7   7    0.29    0.55
   7  18   7   -0.56    0.69
  18  -7   8    1.22    0.74
  18  -7   9    0.96    0.71
  18  -6   0   48.93    2.85
   6  18   0   52.27    2.20
  18  -6   1    8.04    1.21
  18  -6  -1    7.46    1.30
   6  18   1    9.12    1.13
   6  18  -1    9.45    0.86
  18  -6   2   78.70    3.62
  18  -6  -2   75.72    3.69
   6  18   2   84.24    3.27
  18  -6   3   -0.47    0.62
  18  -6  -3   -0.37    0.69
   6  18   3    1.19    0.61
  18  -6   4   23.40    1.98
   6  18   4   20.19    1.79
  18  -6   5   -0.20    0.63
   6  18   5    1.26    0.76
  18  -6   6   27.28    2.16
  18  -6   7    1.60    0.81
  18  -6   8   13.27    1.59
  18  -6   9    0.27    0.77
  18  -6  10    8.17    1.40
  18  -5   0   -0.30    0.57
   5  18   0    0.05    0.36
  18  -5  -1   21.71    1.94
  18  -5   1   23.42    1.97
   5  18  -1   25.89    1.30
   5  18   1   25.03    1.59
 -18   5   1   24.81    1.62
  -5 -18  -2    0.39    0.36
  18  -5  -2    0.10    0.54
  18  -5   2   -0.45    0.61
 -18   5   2    0.27    0.41
   5  18   2   -0.09    0.41
  18  -5   3   54.76    3.02
   5  18   3   55.41    2.70
  18  -5  -3   56.79    3.29
  18  -5   4    3.97    0.87
  18  -5   5   29.81    2.27
  18  -5   6    2.98    0.96
  18  -5   7    8.96    1.36
  18  -5   8   -0.20    0.52
  18  -5   9    3.95    1.08
  18  -5  10    1.43    0.86
  18  -4   0  150.25    5.14
 -18   4   1    1.30    0.39
  18  -4   1    2.99    0.87
  18  -4  -1    1.86    0.77
 -18   4   2   -0.16    0.43
  18  -4  -2    0.00    0.54
  18  -4   2   -0.13    0.58
  -4 -18  -2    0.37    0.40
  18  -4   3    7.97    1.28
  18  -4  -3    7.46    1.26
  18  -4   4    0.37    0.53
  18  -4   5    2.17    0.84
  18  -4   6    4.77    1.01
  18  -4   7    2.13    0.84
  18  -4   8    3.83    0.95
  18  -4   9    2.26    0.96
  18  -4  10    1.31    0.79
  18  -3   0    0.36    0.56
  18  -3   1    3.25    0.82
  -3 -18  -1    4.13    0.59
  18  -3  -1    3.02    0.75
  18  -3   2   15.99    1.63
  18  -3  -2   16.16    1.71
  -3 -18  -2   14.17    1.16
  18  -3  -3    0.92    0.74
  18  -3   3    1.74    0.66
  -3 -18  -3    1.28    0.54
  18  -3  -4    7.97    1.30
  18  -3   4    9.26    1.33
  18  -3   5    0.02    0.53
  18  -3   6    3.61    1.02
  18  -3   7   -0.56    0.57
  18  -3   8    0.95    0.53
  18  -3   9   -0.31    0.96
  18  -3  10    3.31    1.01
  18  -2   0   18.74    1.81
  18  -2   1    8.94    1.28
  18  -2  -1    9.40    1.32
  -2 -18  -1    8.08    0.77
  18  -2  -2  131.98    4.88
  -2 -18  -2  128.51    3.59
  18  -2   2  127.69    4.74
  18  -2   3    0.16    0.54
  18  -2  -3    0.11    0.67
  -2 -18  -3    0.54    0.38
  18  -2  -4   46.00    2.98
  18  -2   4   42.44    2.71
  18  -2   5    3.61    0.93
  18  -2   6   31.02    2.39
  18  -2   7    1.12    0.80
  18  -2   8   33.59    2.53
  18  -2   9    0.17    0.75
  18  -1   0   -0.04    0.53
  18  -1   1   16.73    1.69
  18  -1  -1   16.09    1.64
  -1 -18  -1   15.41    1.02
  18  -1   2    7.42    1.23
  18  -1  -2    6.51    1.17
  -1 -18  -2    6.28    0.77
  18  -1  -3   52.60    3.09
  18  -1   3   47.63    2.83
  -1 -18  -3   47.13    2.25
  18  -1  -4   -0.34    0.72
  18  -1   4   -1.08    0.76
  18  -1   5    1.26    0.70
  18  -1   6   -0.14    0.60
  18  -1   7   16.69    1.86
  18  -1   8   -0.88    0.62
  18  -1   9    0.16    0.63
  18   0   0   25.13    2.06
  18   0   1   18.83    1.81
  18   0  -1   17.89    1.75
   0 -18  -1   18.94    1.12
  18   0  -2   12.75    1.55
  18   0   2   12.41    1.54
   0 -18  -2   13.73    1.09
  18   0  -3    0.83    0.69
  18   0   3    0.47    0.60
   0 -18  -3   -0.05    0.36
  18   0  -4   11.78    1.56
  18   0   4   11.81    1.47
  18   0  -5    5.04    1.13
  18   0   5    6.88    1.14
  18   0   6   24.45    2.17
  18   0   7    9.82    1.49
  18   0   8    9.71    1.54
  18   0   9   -0.96    0.76
  18   1   0   -0.37    0.60
  18   1  -1    1.14    0.67
  18   1   1    0.69    0.59
  18   1  -2   -0.11    0.49
  18   1   2    0.47    0.66
   1 -18  -2   -0.14    0.35
  18   1  -3    2.90    0.83
   1 -18  -3    3.48    0.68
  18   1   3    4.07    0.94
  18   1  -4    1.39    0.72
  18   1   4    1.79    0.80
  18   1  -5    2.66    0.80
  18   1   5    2.81    0.87
  18   1   6    1.44    0.56
  18   1   7    0.08    0.70
  18   1   8   -0.46    0.65
  18   1   9   -0.03    0.72
  18   2   0   34.37    2.59
  18   2  -1   13.42    1.56
  18   2   1   13.00    1.55
  18   2  -2  108.05    4.40
   2 -18  -2  107.51    3.17
  18   2   2  105.83    4.34
  18   2  -3    0.98    0.58
  18   2   3    0.89    0.60
   2 -18  -3    1.17    0.35
  18   2  -4   43.84    2.86
  18   2   4   45.85    2.91
  18   2  -5    3.02    0.98
  18   2   5    2.71    0.88
  18   2  -6   55.08    3.37
  18   2   6   58.31    3.40
  18   2   7    7.63    1.38
  18   2   8   36.28    2.86
  18   3   0   -0.18    0.57
  18   3  -1    0.32    0.59
  18   3   1    1.40    2.20
  18   3   2    0.17    0.59
  18   3  -2    0.33    0.65
  18   3  -3   24.44    2.11
  18   3   3   22.74    2.01
   3 -18  -3   22.30    1.54
  18   3  -4    5.02    1.00
  18   3   4    5.89    1.16
  18   3  -5    1.07    0.72
  18   3   5    0.02    0.57
  18   3  -6    4.41    1.12
  18   3   6    4.14    1.07
  18   3   7    1.37    0.77
  18   3   8    1.50    0.84
  18   4   0   59.82    3.24
  18   4  -1   -0.08    0.60
  18   4   1    0.27    0.56
  18   4   2   16.19    1.73
  18   4  -2   15.69    1.70
  18   4  -3    1.67    0.70
  18   4   3    1.80    0.80
  18   4  -4    3.68    0.89
  18   4   4    4.04    1.05
  18   4  -5   17.15    1.84
  18   4   5   20.41    1.99
  18   4  -6   17.80    1.92
  18   4   6   19.28    2.01
  18   4  -7    3.64    1.10
  18   4   7    5.79    1.22
  18   4   8   30.16    2.64
  18   5   0   -0.42    0.57
  18   5   1   -0.19    0.56
  18   5  -1    0.04    0.52
  18   5   2    3.05    0.92
  18   5  -2    2.66    0.91
  18   5   3    8.76    1.32
  18   5  -3    8.21    1.31
  18   5   4    4.65    1.06
  18   5  -4    2.78    0.89
  18   5   5    1.79    0.71
  18   5  -5    2.55    0.93
  18   5   6    0.03    0.66
  18   5  -6    0.51    0.69
  18   5   7    4.70    1.18
  18   5  -7    4.33    1.08
  18   5  -8    0.00    0.64
  18   6   0   14.77    1.68
  18   6   1    0.43    0.65
  18   6  -1   -0.06    0.54
  18   6   2   70.22    3.58
  18   6  -2   70.72    3.57
  18   6   3    3.24    1.02
  18   6  -3    3.03    0.88
  18   6   4   33.42    2.55
  18   6  -4   35.46    2.06
  18   6  -4   33.44    2.49
  18   6   5    1.65    0.77
  18   6  -5    3.21    0.96
  18   6  -5    3.96    0.86
  18   6  -6   36.73    2.70
  18   6  -6   32.29    2.29
  18   6   6   38.45    2.84
  18   6   7    2.37    1.02
  18   6  -7    2.16    0.79
  18   6  -7    2.60    0.88
  18   6  -8   27.52    2.38
  18   6  -8   29.63    2.58
  18   6  -9    0.40    0.60
  18   6  -9    1.50    0.94
  18   7   0    0.98    0.71
  18   7   1    0.83    0.59
  18   7  -1    0.98    0.54
  18   7   2    0.88    0.72
  18   7  -2    1.50    0.68
  18   7   3    0.78    0.65
  18   7  -3    0.11    0.40
  18   7  -3   -0.56    0.59
  18   7   4    2.07    0.84
  18   7  -4    4.54    0.87
  18   7  -4    3.38    0.96
  18   7   5    8.32    1.40
  18   7  -5    7.66    1.14
  18   7  -5    5.83    1.16
  18   7   6    2.77    0.93
  18   7  -6    1.51    0.75
  18   7  -6   -0.51    0.76
  18   7   7    7.23    1.43
  18   7  -7    6.36    1.22
  18   7  -7    6.85    1.22
  18   7  -8    0.03    0.72
  18   7  -8   -1.41    0.90
  18   7  -9    2.48    0.96
  18   7  -9    1.57    0.86
  18   8   0   65.59    3.48
  18   8   1   -0.33    0.69
  18   8  -1    0.26    0.53
  18   8   2    5.00    1.03
  18   8  -2    7.47    0.80
  18   8  -2    6.51    1.19
  18   8   3   -0.06    0.65
  18   8  -3   -0.05    0.38
  18   8  -3   -0.04    0.54
  18   8   4    7.77    1.35
  18   8  -4    3.50    0.74
  18   8  -4    6.57    1.20
  18   8   5   17.38    1.96
  18   8  -5   20.39    1.74
  18   8  -5   17.85    2.11
  18   8   6   15.34    1.90
  18   8  -6   14.72    1.55
  18   8  -6   15.00    1.83
  18   8  -7    5.04    0.99
  18   8  -7    4.78    1.06
  18   8  -8   10.26    1.54
  18   8  -8    9.34    1.49
  18   8  -9    2.11    0.90
  18   8  -9    3.19    1.07
  18   9   0    0.25    0.77
  18   9   1    2.50    0.84
  18   9  -1    3.95    0.99
  18   9   2   -0.29    0.71
  18   9  -2   -0.06    0.65
  18   9   3    3.57    0.94
  18   9  -3    3.83    0.70
  18   9  -3    4.22    1.08
  18   9   4    4.85    1.14
  18   9  -4    3.73    0.67
  18   9  -4    4.90    1.16
  18   9   5    3.17    0.94
  18   9  -5    2.54    0.64
  18   9  -5    2.38    0.85
  18   9   6    1.95    1.04
  18   9  -6   -0.72    0.60
  18   9  -6   -0.28    0.81
  18   9  -7    6.20    1.15
  18   9  -7    8.94    1.48
  18   9  -8    2.49    0.96
  18   9  -8    0.68    0.96
  18   9  -9    0.43    0.89
  18   9  -9    4.12    1.19
  18  10   0   41.38    2.79
  18  10   1    0.65    0.84
  18  10  -1    0.29    0.58
  18  10  -2   24.14    2.23
  18  10   2   24.04    2.14
  18  10   3    9.16    1.47
  18  10  -3    8.55    1.36
  18  10   4   17.86    2.01
  18  10  -4   20.40    1.66
  18  10  -4   16.11    1.77
  18  10   5    0.72    0.61
  18  10  -5    2.40    0.76
  18  10  -5    1.89    0.82
  18  10  -6   23.52    2.09
  18  10  -6   21.14    2.09
  18  10  -7    4.27    1.05
  18  10  -7    4.40    1.05
  18  10  -8   17.06    1.98
  18  10  -8   16.29    1.91
  18  10  -9   -0.94    0.76
  18  11   0    0.15    0.64
  18  11   1    0.89    0.77
  18  11  -1    0.71    1.13
  18  11   2    1.23    0.81
  18  11  -2    0.00    0.58
  18  11   3    1.67    0.72
  18  11  -3    1.28    0.71
  18  11   4   -0.26    0.66
  18  11  -4    0.82    0.70
  18  11   5    0.50    0.72
  18  11  -5    0.47    0.44
  18  11  -5    0.70    0.62
  18  11  -6    1.50    0.83
  18  11  -6    1.06    0.79
  18  11  -7   11.51    1.55
  18  11  -7    8.27    1.32
  18  11  -8    0.78    0.84
  18  11  -8   -0.45    0.73
  18  12   0    6.35    1.25
  18  12  -1    0.33    0.60
  18  12   1    1.94    1.06
  18  12   2   10.54    1.51
  18  12  -2    8.05    1.32
  18  12   3   -0.50    0.61
  18  12  -3    0.14    0.68
  18  12   4    4.69    1.08
  18  12  -4    4.37    1.13
  18  12  -5    2.33    0.80
  18  12  -6    9.69    1.45
  18  12  -6    7.73    1.31
  18  12  -7    5.49    1.20
  18  12  -7    4.56    1.11
  18  12  -8    3.91    1.24
  18  13   0   -0.67    0.71
  18  13   1    2.70    0.88
  18  13  -1    5.35    1.08
  18  13   2    0.87    0.83
  18  13  -2    0.70    0.76
  18  13  -3    3.30    1.05
  18  13   3    3.40    1.09
  18  13  -4    1.95    0.88
  18  13   4    4.47    1.10
  18  13  -5    9.98    1.47
  18  13  -6   -0.31    0.68
  18  13  -7    5.44    1.21
  18  14   0   13.08    1.68
  18  14  -1    0.15    0.71
  18  14   1   -0.28    0.59
  18  14  -2    8.74    1.40
  18  14   2    8.34    1.44
  18  14  -3    1.37    0.79
  18  14   3   -0.91    0.89
  18  14  -4   10.91    1.57
  18  14  -5    0.16    0.71
  18  15   0    0.10    0.79
  18  15   1    2.98    0.87
  18  15  -1    2.89    1.02
  18  15  -2    1.37    0.77
  18  15   2   -0.41    0.73
  18  15   3    2.36    0.90
  18  15  -3    3.75    0.99
  18  15  -4   -0.67    0.73
  18  16   0    7.39    1.37
  18  16  -1    0.96    0.80
  18  16   1   -0.27    0.56
  18  16   2    7.34    1.37
  18  16  -2    5.93    1.26
  18  16  -3    0.71    0.75
  18  17   0    0.36    0.82
  18  17  -1    2.71    1.06
  18  17   1    4.64    1.24
  19 -15  -1    0.03    0.61
  19 -15  -2   38.36    2.79
  15  19   2   29.90    2.48
  19 -15  -3    2.25    0.91
  15  19   3    0.19    0.60
  15  19   4   10.83    1.59
  19 -14   0   -0.09    0.56
  19 -14   1    6.47    1.16
  19 -14  -1    8.11    1.32
  14  19   1    8.11    1.32
  19 -14  -2    3.10    0.92
  14  19   2    1.78    0.87
  19 -14  -3    2.23    0.82
  14  19   3    1.05    0.68
  14  19   4   -0.35    0.68
  19 -13   0    0.98    0.78
  19 -13   1    1.74    0.78
  19 -13  -1    1.08    0.69
  13  19   1    1.15    0.66
  19 -13  -2    0.26    0.64
  19 -13   2    3.08    0.91
  13  19   2    0.31    0.71
  19 -13  -3    0.43    0.69
  13  19   3    0.78    0.73
  13  19   4    0.06    0.63
  13  19   5    0.44    0.62
  19 -12   0   -0.50    0.69
  19 -12  -1   20.32    2.02
  19 -12   1   22.12    1.99
  12  19   1   20.66    1.86
  19 -12  -2    1.57    0.77
  19 -12   2    0.50    0.67
  12  19   2    0.77    0.56
  19 -12  -3   25.89    2.37
  19 -12   3   30.09    2.28
  12  19   3   27.66    2.27
  19 -12   4    1.44    0.65
  12  19   4    2.40    1.02
  12  19   5   13.52    1.78
  12  19   6    1.08    0.86
  19 -11   0   54.69    3.16
  19 -11   1   -0.53    0.61
  19 -11  -1    0.37    0.71
  11  19   1   -0.39    0.47
  19 -11  -2   70.94    3.74
  19 -11   2   66.76    3.44
  11  19   2   69.13    3.35
  19 -11   3    2.41    0.80
  19 -11  -3    3.80    1.04
  11  19   3    5.57    1.13
  19 -11   4   30.24    2.26
  11  19   4   29.30    2.37
  19 -11   5    0.37    0.67
  11  19   5    0.92    0.75
  11  19   6   19.40    2.13
  19 -10   0    0.30    0.56
  10  19   0    0.96    0.70
  19 -10   1    4.57    1.01
  19 -10  -1    3.64    1.01
  10  19   1    2.07    0.55
  19 -10  -2   -0.12    0.68
  19 -10   2    2.12    0.90
  10  19   2    0.21    0.58
  19 -10   3    1.16    0.69
  19 -10  -3    0.21    0.73
  10  19   3    0.50    0.66
  19 -10   4    0.92    0.67
  10  19   4    1.29    0.72
  19 -10   5    4.43    0.98
  10  19   5    4.01    1.14
  19 -10   6    7.68    1.21
  10  19   6    8.24    1.45
  10  19   7   -1.54    1.02
  19  -9   0    9.26    1.35
   9  19   0   11.00    1.17
  19  -9   1    0.63    0.58
  19  -9  -1    1.57    0.84
   9  19   1    1.18    0.56
  19  -9  -2   -0.74    0.74
  19  -9   2    1.02    0.60
   9  19   2    1.36    0.78
  19  -9   3    3.83    0.98
  19  -9  -3    4.33    1.20
   9  19   3    3.04    0.84
  19  -9   4    1.19    0.58
   9  19   4    0.47    0.54
  19  -9   5    1.18    0.64
   9  19   5    2.31    0.81
  19  -9   6    2.70    0.90
   9  19   6    0.38    0.78
  19  -9   7    3.18    0.96
   9  19   7    3.18    0.87
  19  -8   0   -0.21    0.68
   8  19   0    0.98    0.58
  19  -8  -1   50.77    3.06
  19  -8   1   52.95    3.07
   8  19   1   57.55    2.67
  19  -8  -2    3.55    1.00
  19  -8   2    4.14    0.91
   8  19   2    2.83    0.63
  19  -8   3   57.24    3.18
  19  -8  -3   56.66    3.37
   8  19   3   61.21    3.12
  19  -8   4    0.17    0.59
   8  19   4   -0.62    0.74
  19  -8   5   22.95    2.06
   8  19   5   30.12    2.37
  19  -8   6   -1.35    0.78
   8  19   6   -0.72    0.69
  19  -8   7   22.11    2.02
   8  19   7   19.33    2.11
  19  -8   8    1.98    0.88
  19  -7   0  102.95    4.36
   7  19   0  107.66    3.41
  19  -7   1    0.20    0.53
  19  -7  -1    0.49    0.63
   7  19   1    0.59    0.45
  19  -7   2   97.35    4.18
  19  -7  -2   97.96    4.35
   7  19   2   97.84    3.71
  19  -7  -3    2.78    0.86
  19  -7   3    2.20    0.98
   7  19   3    3.79    0.85
  19  -7   4   26.37    2.15
   7  19   4   27.18    2.09
  19  -7   5    2.78    0.81
   7  19   5    3.96    1.15
  19  -7   6   33.17    2.47
  19  -7   7   -0.73    0.78
  19  -7   8   12.72    1.57
  19  -7   9   -0.18    0.60
  19  -6   0    0.00    0.54
   6  19   0   -0.10    0.33
  19  -6   1    0.84    0.59
  19  -6  -1    1.15    0.75
   6  19   1    1.85    0.57
  19  -6  -2    1.15    0.77
  19  -6   2   -0.66    0.58
   6  19   2    0.67    0.46
  19  -6  -3    6.37    1.29
  19  -6   3    5.99    1.14
   6  19   3    5.27    0.92
  19  -6  -4    7.00    1.33
  19  -6   4    7.75    1.26
   6  19   4    8.82    1.23
  19  -6   5    0.02    0.64
  19  -6   6    1.76    0.97
  19  -6   7    1.93    0.84
  19  -6   8    0.38    0.58
  19  -6   9   -0.64    0.61
  19  -5   0    0.78    0.68
  19  -5   1    9.30    1.37
  19  -5  -1   13.61    1.61
  19  -5   2    2.21    0.77
  19  -5  -2    3.33    1.01
  19  -5   3    0.83    0.59
  19  -5  -3   -0.43    0.72
  19  -5  -4    0.20    0.63
  19  -5   4    0.42    0.69
  19  -5   5    2.59    0.83
  19  -5   6    1.12    0.86
  19  -5   7    3.83    1.01
  19  -5   8    0.21    0.73
  19  -5   9    2.70    0.90
  19  -4   0   -0.44    0.75
  19  -4   1  172.90    5.72
  19  -4  -1  177.56    5.84
  19  -4   2    0.45    0.70
  19  -4  -2   -0.46    0.69
  19  -4  -3   69.46    3.69
  19  -4   3   69.75    3.55
  19  -4  -4    1.66    0.84
  19  -4   4   -0.30    0.64
  19  -4   5   52.22    3.12
  19  -4   6   -0.24    0.58
  19  -4   7   23.59    2.21
  19  -4   8    0.79    0.68
  19  -4   9   10.09    1.51
  19  -3   0   52.35    3.05
  19  -3   1   -0.16    0.67
  19  -3  -1    1.63    0.88
  19  -3  -2  128.63    5.00
  19  -3   2  130.69    4.93
  19  -3   3    4.08    0.96
  19  -3  -3    4.47    1.07
  19  -3  -4   51.66    3.23
  19  -3   4   42.90    2.80
  19  -3   5   -0.12    0.58
  19  -3   6   18.91    1.92
  19  -3   7    0.48    0.73
  19  -3   8   13.34    1.62
  19  -3   9    0.89    0.91
  19  -2   0    0.07    0.57
  19  -2  -1    3.36    0.96
  19  -2   1    4.15    1.03
  19  -2  -2   -0.72    0.70
  19  -2   2    1.16    0.77
  19  -2  -3   -0.26    0.63
  19  -2   3   -0.19    0.53
  19  -2  -4    3.04    0.86
  19  -2   4    3.61    1.01
  19  -2  -5    0.93    0.73
  19  -2   5    1.85    0.79
  19  -2   6    3.34    0.96
  19  -2   7   -1.33    0.78
  19  -2   8    2.59    0.90
  19  -1   0    1.49    0.74
  19  -1  -1   11.04    1.49
  19  -1   1    9.41    1.38
  19  -1  -2    9.97    1.42
  19  -1   2    9.13    1.34
  19  -1   3    0.32    0.59
  19  -1  -3    1.62    0.85
  19  -1  -4   23.75    2.19
  19  -1   4   16.48    1.79
  19  -1  -5    2.25    0.94
  19  -1   5    0.42    0.65
  19  -1   6    0.16    0.68
  19  -1   7   10.25    1.52
  19  -1   8    5.20    1.13
  19   0   0   -0.42    0.59
  19   0  -1   95.85    4.20
  19   0   1   96.75    4.28
  19   0  -2    2.52    0.89
  19   0   2    2.78    0.93
  19   0  -3  178.41    6.03
  19   0   3  184.90    6.03
  19   0  -4    3.34    1.05
  19   0   4    2.66    0.89
  19   0  -5   73.60    3.93
  19   0   5   79.10    3.93
  19   0   6   -0.41    0.64
  19   0   7   48.97    3.20
  19   0   8    1.12    0.69
  19   1   0   79.63    3.83
  19   1  -1    8.27    1.30
  19   1   1    8.01    1.29
  19   1   2   20.67    1.98
  19   1  -2   25.04    2.17
  19   1  -3    3.34    1.05
  19   1   3    1.79    0.79
  19   1  -4   31.75    2.48
  19   1   4   29.28    2.39
  19   1  -5    3.68    1.01
  19   1   5    2.89    0.97
  19   1  -6   24.67    2.34
  19   1   6   21.22    2.12
  19   1   7    1.70    0.92
  19   1   8   11.69    1.61
  19   2   0    0.46    0.57
  19   2  -1    1.02    0.69
  19   2   1    1.60    0.81
  19   2   2    2.92    0.85
  19   2  -2    2.90    0.91
  19   2  -3   16.12    1.78
  19   2   3   14.13    1.68
  19   2  -4    0.97    0.79
  19   2   4    0.56    0.59
  19   2  -5    0.13    0.62
  19   2   5    0.50    0.83
  19   2  -6   25.15    2.37
  19   2   6   27.77    2.38
  19   2   7    3.67    1.04
  19   3   0   14.01    1.61
  19   3  -1    6.39    1.20
  19   3   1    5.64    1.14
  19   3   2   17.23    1.82
  19   3  -2   15.05    1.74
  19   3  -3    1.47    0.73
  19   3   3    1.20    0.74
  19   3  -4   20.07    2.04
  19   3   4   21.51    2.09
  19   3  -5    8.61    1.39
  19   3   5    8.49    1.45
  19   3  -6   10.65    1.60
  19   3   6    8.68    1.40
  19   3  -7    0.14    0.61
  19   3   7    2.12    0.95
  19   4   0    0.29    0.68
  19   4  -1   90.38    4.17
  19   4   1   96.49    4.32
  19   4  -2   10.73    1.44
  19   4   2   10.86    1.55
  19   4  -3  185.90    6.17
  19   4   3  187.11    6.22
  19   4  -4    1.60    0.80
  19   4   4    1.74    0.86
  19   4  -5   53.43    3.29
  19   4   5   51.79    3.30
  19   4  -6    1.21    0.80
  19   4   6    0.86    0.78
  19   4  -7   67.12    3.83
  19   4   7   70.88    3.95
  19   5   0   25.24    2.19
  19   5   1    4.39    1.10
  19   5  -1    2.03    0.71
  19   5   2   17.81    1.91
  19   5  -2   13.83    1.60
  19   5   3   -0.12    0.63
  19   5  -3    0.39    0.86
  19   5   4   24.02    2.26
  19   5  -4   22.97    2.15
  19   5   5    3.48    1.05
  19   5  -5    3.77    1.12
  19   5   6    8.24    1.37
  19   5  -6    9.62    1.47
  19   5  -7   -1.49    0.88
  19   6   0    0.53    0.66
  19   6   1    0.36    0.62
  19   6  -1   -0.22    0.69
  19   6   2   -0.01    0.62
  19   6  -2   -0.25    0.61
  19   6   3    9.61    1.50
  19   6  -3   11.58    1.54
  19   6   4    6.21    1.24
  19   6  -4    6.74    1.24
  19   6   5    1.36    0.59
  19   6  -5    2.18    0.93
  19   6   6   13.13    1.78
  19   6  -6   10.25    1.56
  19   6  -7    5.24    1.25
  19   7   0   28.09    2.35
  19   7   1    3.72    1.08
  19   7  -1    1.60    0.83
  19   7   2   40.06    2.85
  19   7  -2   37.54    2.71
  19   7   3   -0.26    0.74
  19   7  -3    0.77    0.82
  19   7   4   23.87    2.28
  19   7  -4   24.37    2.21
  19   7   5    1.40    0.75
  19   7  -5    0.97    0.60
  19   7  -5    1.01    0.76
  19   7   6   14.52    1.89
  19   7  -6   14.93    1.63
  19   7  -6   16.52    1.94
  19   7  -7    0.03    0.62
  19   7  -7   -0.26    0.61
  19   7  -8    3.81    1.02
  19   7  -9   10.67    1.67
  19   8   0   -0.43    0.58
  19   8  -1   77.38    3.88
  19   8   1   68.90    3.73
  19   8   2   -0.15    0.64
  19   8  -2    1.77    0.85
  19   8   3  111.81    4.86
  19   8  -3  106.91    4.64
  19   8   4    0.30    0.61
  19   8  -4    0.01    0.60
  19   8   5   51.21    3.39
  19   8  -5   46.90    2.63
  19   8  -5   47.23    3.11
  19   8  -6    5.47    1.06
  19   8  -6    5.53    1.15
  19   8  -7   28.79    2.31
  19   8  -7   26.39    2.49
  19   8  -8    3.11    1.10
  19   8  -9   23.57    2.39
  19   9   0   -0.59    0.66
  19   9   1    7.05    1.26
  19   9  -1    6.58    1.30
  19   9   2   15.52    1.82
  19   9  -2   13.60    1.74
  19   9   3   -0.27    0.64
  19   9  -3   -0.61    0.72
  19   9   4    8.95    1.50
  19   9  -4    4.41    1.15
  19   9   5    1.64    0.83
  19   9  -5    3.00    1.00
  19   9  -6    0.71    0.50
  19   9  -6    0.84    0.74
  19   9  -7    2.24    0.97
  19   9  -7    0.62    0.77
  19   9  -8    3.04    0.95
  19  10   0   -0.13    0.61
  19  10  -1   -0.29    0.61
  19  10   1   -0.21    0.66
  19  10  -2    7.87    1.37
  19  10   2    8.05    1.40
  19  10  -3   -0.09    0.62
  19  10   3    0.45    0.73
  19  10  -4    0.19    0.70
  19  10   4    0.77    0.72
  19  10  -5    1.26    0.75
  19  10  -6   13.12    1.75
  19  10  -7    2.02    0.99
  19  11   0   24.05    2.20
  19  11   1   -0.88    0.71
  19  11  -1   -0.14    0.72
  19  11  -2   21.67    2.11
  19  11   2   20.71    2.12
  19  11  -3    5.25    1.51
  19  11   3    0.06    0.75
  19  11  -4   19.77    2.06
  19  11   4   18.74    2.14
  19  11  -5    1.44    0.68
  19  11  -6   25.95    2.35
  19  11  -7    1.32    0.89
  19  12   0    0.19    0.61
  19  12  -1   32.83    2.58
  19  12   1   37.52    2.86
  19  12   2    1.05    0.81
  19  12  -2   -1.30    0.79
  19  12  -3   43.30    2.97
  19  12   3   42.39    3.10
  19  12  -4    0.05    0.68
  19  12  -5   33.53    2.65
  19  12  -6    3.69    1.24
  19  12  -7   20.99    2.23
  19  13   0    6.90    1.33
  19  13   1    0.06    0.62
  19  13  -1    0.86    0.63
  19  13   2    1.74    0.74
  19  13  -2    1.23    0.68
  19  13  -3   -0.23    0.68
  19  13  -4   -0.10    0.62
  19  13  -5    4.36    1.11
  19  13  -6    0.31    0.66
  19  14   0   -0.79    0.73
  19  14  -1    2.24    1.16
  19  14   1   -0.15    0.82
  19  14  -2   -0.91    0.64
  19  14  -3    0.17    0.68
  19  14  -4    1.00    0.69
  19  14  -5    0.32    0.92
  19  15   0    5.58    1.28
  19  15   1    0.71    0.68
  19  15  -1    1.77    0.91
  19  15  -2   20.30    2.14
  19  15  -3    0.62    0.78
  19  16   0    0.03    0.68
  19  16  -1   19.96    2.23
  19  16  -2    1.10    1.13
  20 -14   0    2.08    0.84
  20 -14  -1    2.55    0.91
  20 -14  -2    0.57    0.60
  20 -13   0    0.48    0.62
  20 -13  -1    4.73    1.11
  20 -13   1    5.86    1.14
  20 -13   2    1.23    0.74
  20 -13  -2    1.06    0.63
  20 -13  -3    2.01    0.87
  13  20   4    0.37    0.78
  13  20   5    0.58    0.78
  20 -12   0    2.74    0.94
  20 -12   1    1.85    0.80
  20 -12  -1    1.52    0.70
  20 -12   2   11.44    1.52
  20 -12  -2   10.37    1.51
  20 -12   3    3.30    0.97
  20 -12  -3    3.01    0.99
  12  20   3    4.00    1.08
  12  20   4    5.44    1.13
  12  20   5    0.47    0.66
  20 -11   0   -0.40    0.55
  20 -11  -1   32.01    2.50
  20 -11   1   33.59    2.50
  20 -11   2    0.79    0.68
  20 -11  -2    2.03    0.86
  20 -11  -3   20.41    2.14
  20 -11   3   21.94    2.00
  11  20   3   23.34    2.06
  20 -11  -4    0.75    0.79
  20 -11   4    0.70    0.61
  11  20   4    0.26    0.60
  11  20   5    3.33    1.13
  11  20   6   -0.27    0.66
  20 -10   0    5.60    1.13
  20 -10   1    0.04    0.57
  20 -10  -1    0.61    0.55
  20 -10   2    6.70    1.24
  20 -10  -2    6.22    1.25
  20 -10   3    1.50    0.75
  20 -10  -3    3.20    1.08
  10  20   3    2.98    0.96
  20 -10  -4    2.17    0.96
  20 -10   4    0.70    0.59
  10  20   4   -0.22    0.62
  20 -10   5    2.59    0.89
  10  20   5    2.91    1.04
  20 -10   6    2.77    0.88
  10  20   6    0.40    0.80
  20  -9   0    0.09    0.57
  20  -9   1    6.93    1.25
  20  -9  -1    9.35    1.46
  20  -9   2   -0.49    0.60
  20  -9  -2    1.71    0.88
   9  20   2    0.12    0.50
  20  -9   3    1.62    0.81
  20  -9  -3    1.86    0.87
   9  20   3    0.81    0.56
  20  -9  -4    0.72    0.75
  20  -9   4    1.10    0.64
   9  20   4    0.55    0.60
  20  -9   5    1.06    0.63
   9  20   5    0.12    0.69
  20  -9   6    1.25    0.75
   9  20   6    0.02    0.71
  20  -9   7    6.11    1.22
   9  20   7    6.98    1.38
  20  -8   0   32.03    2.47
  20  -8   1    0.36    0.65
  20  -8  -1    0.81    0.67
  20  -8   2   29.90    2.37
  20  -8  -2   26.54    2.36
   8  20   2   32.00    2.18
  20  -8   3    3.15    1.09
  20  -8  -3    1.93    0.86
   8  20   3    2.04    0.76
  20  -8  -4    4.03    1.23
  20  -8   4    4.26    0.98
   8  20   4    2.70    0.84
  20  -8   5    2.27    0.86
   8  20   5    1.43    0.69
  20  -8   6    5.89    1.21
   8  20   6    5.55    1.23
  20  -8   7    0.38    0.62
  20  -7   0    0.84    0.79
  20  -7   1   55.17    3.25
  20  -7  -1   52.09    3.20
  20  -7   2    4.67    1.08
  20  -7  -2    4.26    1.04
   7  20   2    4.50    0.85
  20  -7   3   14.39    1.73
  20  -7  -3   13.15    1.70
   7  20   3   13.41    1.50
  20  -7  -4    2.09    1.00
  20  -7   4    1.74    0.75
   7  20   4    1.80    0.70
  20  -7   5    5.70    1.12
  20  -7   6    1.83    0.67
  20  -7   7    9.49    1.44
  20  -7   8    0.73    0.69
  20  -6   0    8.86    1.35
  20  -6   1    0.27    0.71
  20  -6  -1    1.51    0.64
  20  -6   2   14.04    1.67
  20  -6  -2   15.38    1.78
  20  -6   3    1.09    0.70
  20  -6  -3    1.68    0.82
  20  -6  -4    1.04    0.91
  20  -6   4   -0.70    0.74
  20  -6   5    2.88    0.91
  20  -6   6    9.96    1.42
  20  -6   7    1.48    0.96
  20  -6   8    0.56    0.53
  20  -5   0   -0.37    0.59
  20  -5   1    5.00    1.16
  20  -5  -1    4.97    1.10
  20  -5  -2   -0.46    0.66
  20  -5   2    0.23    0.61
  20  -5  -3   10.31    1.52
  20  -5   3    9.01    1.42
  20  -5  -4    0.33    0.62
  20  -5   4   -0.28    0.76
  20  -5   5    0.35    0.68
  20  -5   6    1.72    0.65
  20  -5   7    3.58    0.97
  20  -5   8    1.06    0.60
  20  -4   0  123.05    4.97
  20  -4  -1    1.52    0.86
  20  -4   1    2.62    0.88
  20  -4  -2   15.22    1.82
  20  -4   2   19.70    1.98
  20  -4  -3    0.91    0.72
  20  -4   3    2.65    0.94
  20  -4  -4   13.36    1.78
  20  -4   4   11.79    1.61
  20  -4  -5    1.00    0.69
  20  -4   5    0.79    0.77
  20  -4   6   19.03    1.95
  20  -4   7   -0.30    0.59
  20  -4   8    6.02    1.18
  20  -3   0    0.63    0.76
  20  -3   1   25.55    2.21
  20  -3  -1   26.73    2.31
  20  -3  -2    0.48    0.64
  20  -3   2    0.16    0.64
  20  -3   3   17.60    1.88
  20  -3  -3   16.64    1.89
  20  -3  -4    3.19    0.97
  20  -3   4    1.02    0.69
  20  -3  -5    4.98    1.26
  20  -3   5    3.39    0.93
  20  -3   6    1.28    0.70
  20  -3   7    2.97    0.96
  20  -2   0   23.05    2.11
  20  -2  -1   -0.31    0.68
  20  -2   1   -0.02    0.63
  20  -2  -2   21.58    2.09
[truncated: 187,574 more chars]
