# Supplementary material
Source: MDPI journal article supplement (https://www.mdpi.com/2304-6740/11/7/264)
Supplement: s1 [file s1 › Supplementary materials.pdf]

## Supplementary Materials

### Synthesis, crystal structure, and luminescence sensing properties of the supramolecular 3D zinc(II) coordination polymer with bis(1H-imidazol-1-yl)methane

Vladislava V. Matveevskaya <sup>1</sup>, Dmitry I. Pavlov <sup>1</sup>, Alexei A. Ryadun <sup>1</sup>, Vladimir P. Fedin <sup>1,\*</sup> and Andrei S. Potapov <sup>1,\*</sup>

<sup>1</sup> Nikolaev Institute of Inorganic Chemistry, 3 Lavrentiev Ave., 630090 Novosibirsk, Russia; matveevskaya@niic.nsc.ru (V.V.M.); pavlov@niic.nsc.ru (D.I.P.); cluster@niic.nsc.ru (V.P.F.); potapov@niic.nsc.ru (A.S.P.)

\* Correspondence: potapov@niic.nsc.ru (A.S.P.), cluster@niic.nsc.ru (V.P.F.); Tel.: +7(383)330-92-56

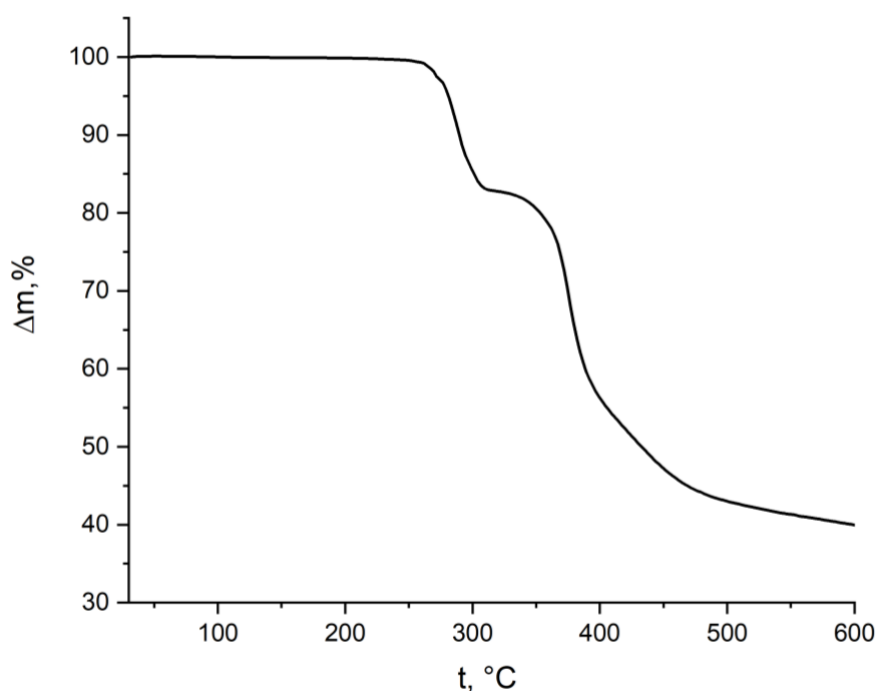

**Figure S1.** Thermogravimetric plot for Zn-MOF.

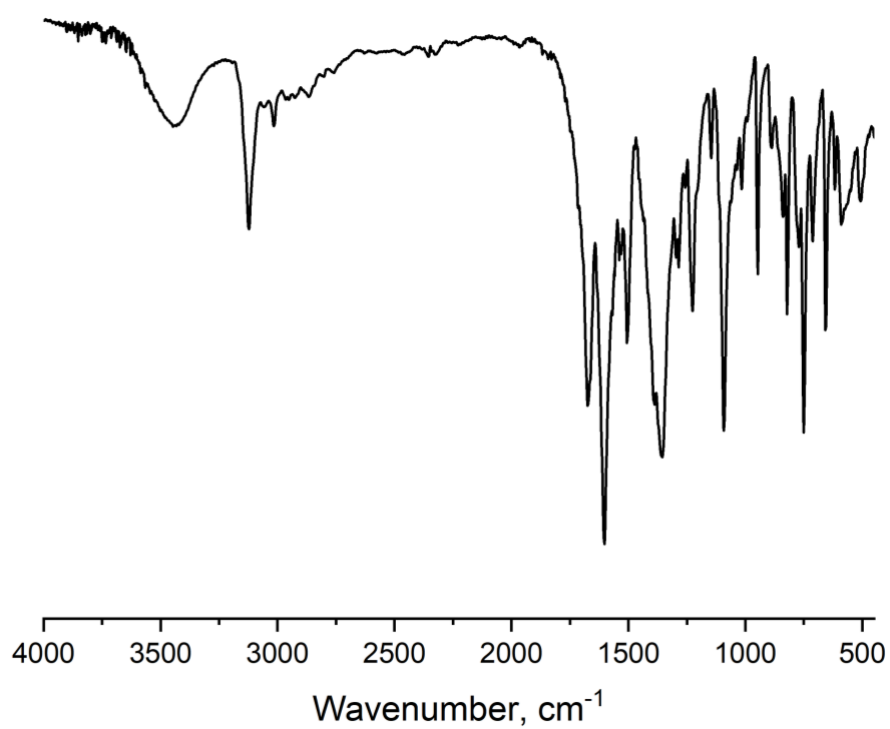

**Figure S2.** FT-IR spectrum of **Zn-MOF**.

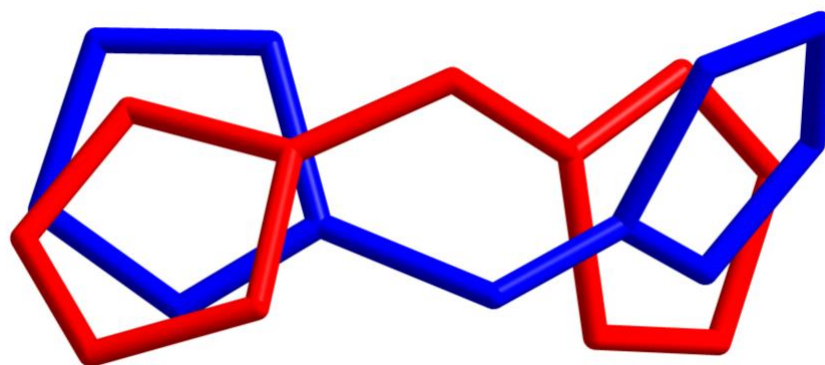

**Figure S3.** Two disordered positions of bim ligand in the structure of **Zn-MOF**.

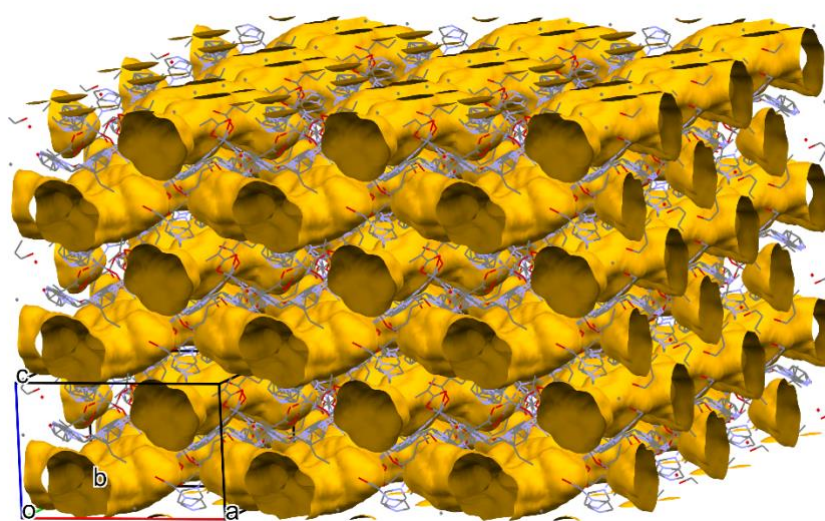

**Figure S4.** Crystal packing representation ( $3 \times 3 \times 3$  unit cells) of **Zn-MOF** showing isolated voids.

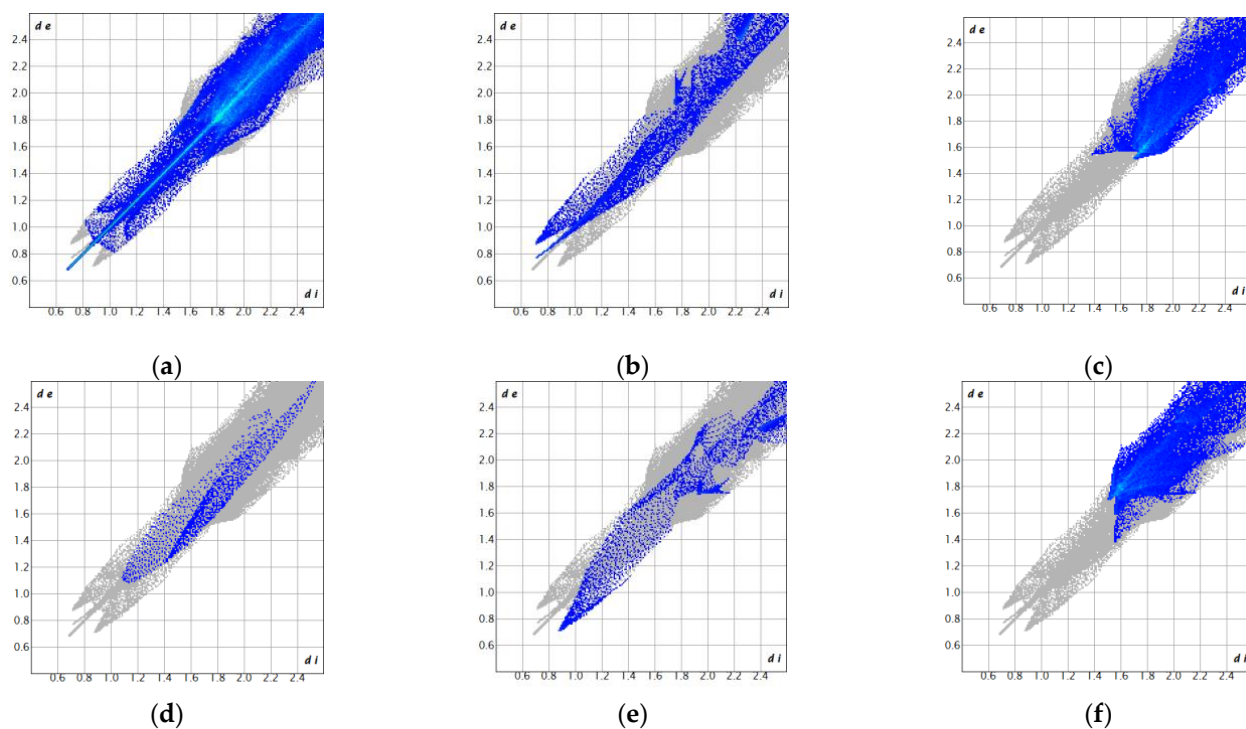

**Figure S5.** Fingerprint plots from Hirshfeld surface analysis of the crystal structure of **Zn-MOF**: (a) C...C contacts; (b) C...N contacts; (c) C...O contacts; (d) N...N contacts; (e) N...C contacts; (f) O...C contacts.

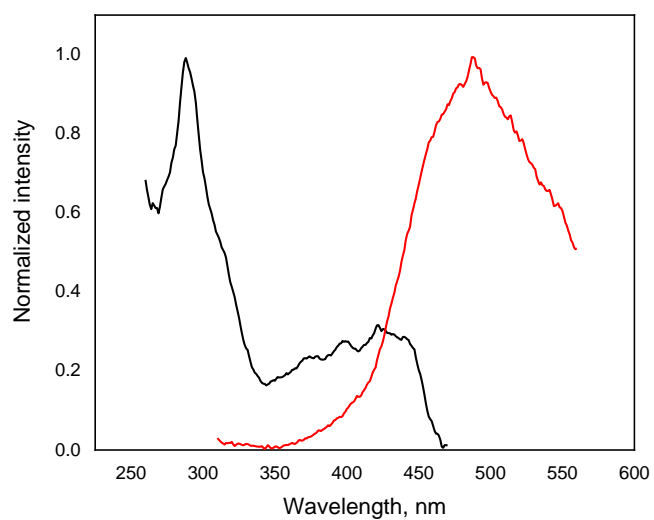

**Figure S6.** Luminescence excitation spectrum of H<sub>2</sub>bdc ligand in the solid phase at an emission wavelength of 490 nm (black line) and emission spectrum of H<sub>2</sub>BDC upon excitation at 290 nm (red line).

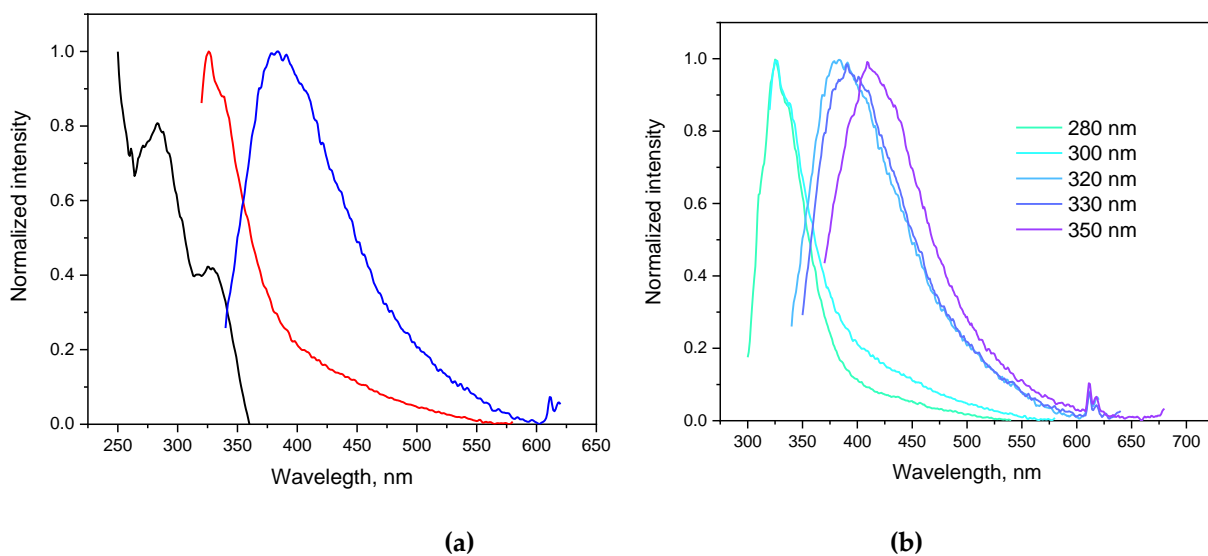

**Figure S7.** Luminescence excitation and emission spectra of bim ligand in the solid phase: (a) Excitation spectrum of bim at an emission wavelength of 380 nm (black line) and emission spectra of bim upon excitation at 300 nm (red line) and 320 nm (blue line); (b) Emission spectra of bim at different excitation wavelengths.

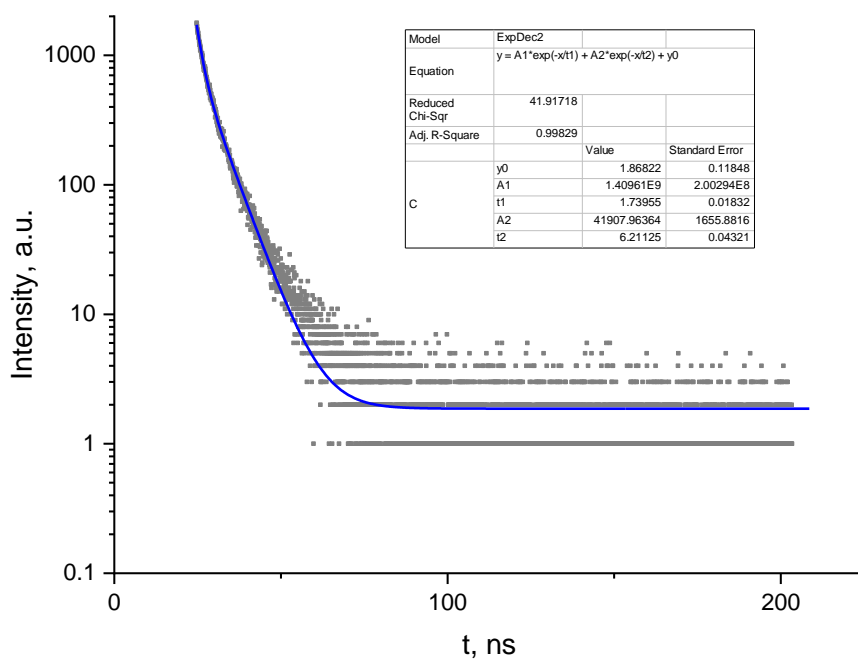

**Figure S8.** Luminescence decay kinetics Zn-MOF.

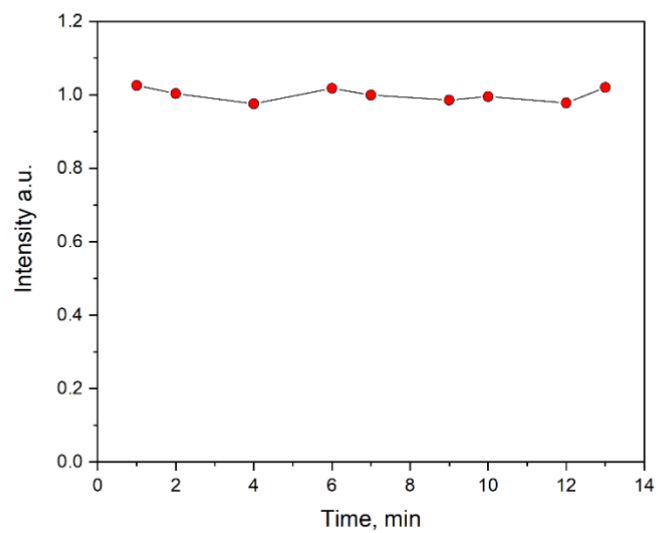

**Figure S9.** Luminescence emission intensity of **Zn-MOF** versus time plot.

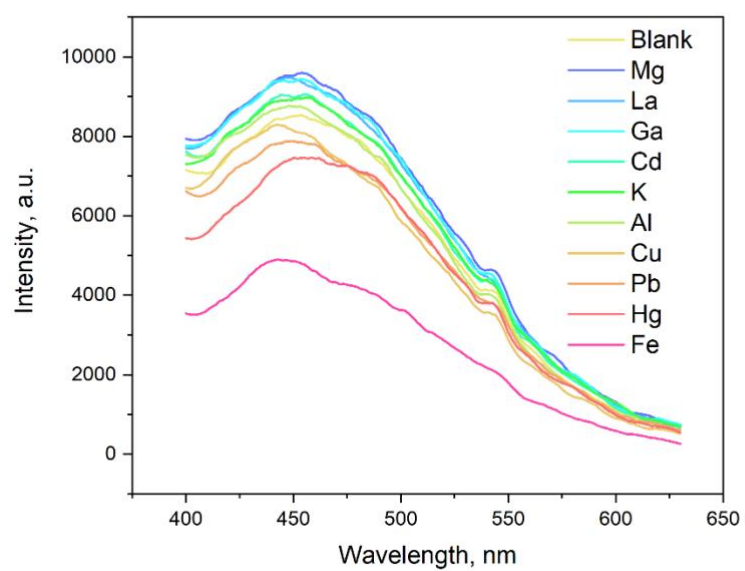

**Figure S10.** Luminescence emission spectra of **Zn-MOF** ethanol suspensions in the presence of metal cations.

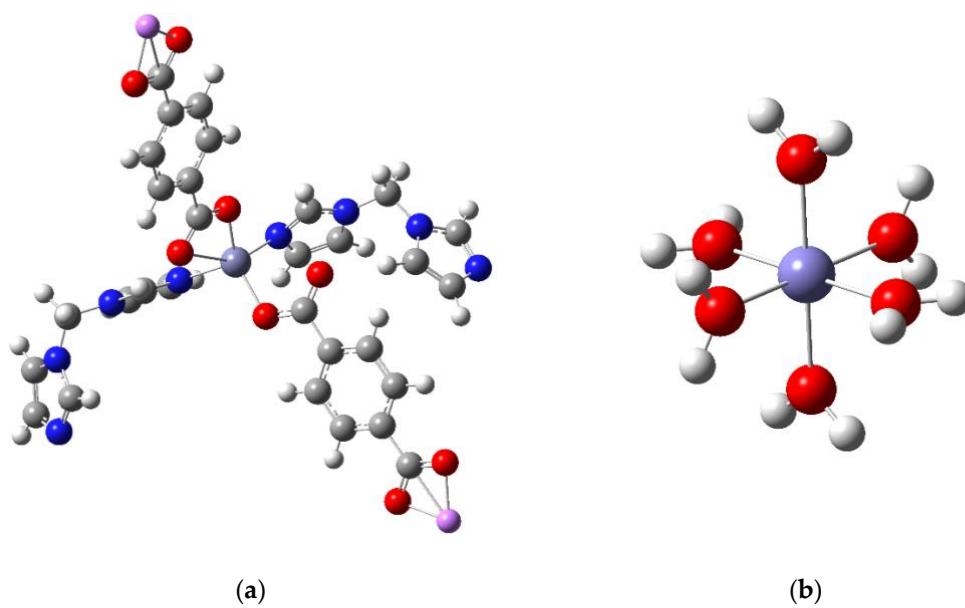

**Figure S11.** DFT B3LYP 6-311+G(2d,p) optimized structures: (a) **Zn-MOF** model; (b)  $[\text{Fe}(\text{H}_2\text{O})_6]^{3+}$ .
